# Supplementary material
Source: publisher figshare collection journal article supplement (https://diabetesjournals.figshare.com/articles/dataset/_/13103045)
Supplement: Supplementary file 1 [file 1]

Supplementary Table 4

Pathway analysis of upregulated gene expression at ZT 4 in Bmal1<sup>0V</sup> (HFD) vs. Control (HFD)

| GO: Pathway Name                                                          | P-value   | Genes                                                                                                                                  |
|---------------------------------------------------------------------------|-----------|----------------------------------------------------------------------------------------------------------------------------------------|
| regulation of hormone levels(4)                                           | 2.93E-07  | ABCC8,ARNTL,ATP1A1,ATP6AP2,CPE,ERO1LB,G6PC2,GLP1R,HADH,HSD17B11,ICA1,INHA,KCNMA1,PCSK1,PCSK2,PTPRN,PTPRN2,SCG5,SLC30A8,SNAP25,TTR,UCN3 |
| monocarboxylic acid metabolic process(7)                                  | 1.24E-04  | ACAA2,ALDOB,APOA1,ATP8B1,CD74,CYP2C65,CYP2C66,CYP2C68,CYP2D26,CYP4F14,DGAT2,EGLN3,ERO1LB,FABP1,FABP2,GGT1,GPD1,HADH,P4HB,UGT2B34       |
| peptide hormone processing(4)                                             | 1.24E-04  | ATP6AP2,CPE,ERO1LB,PCSK1,PCSK2,SCG5                                                                                                    |
| nitrogen compound transport(5)                                            | 6.96E-04  | ABCC8,ACE2,ARNTL,CADPS,CD74,CDH17,CHGA,G6PC2,GLP1R,HADH,ICA1,MAOB,PTPRN,PTPRN2,SLC16A12,SLC30A8,SLC38A4,SLC7A14,SLC7A8,TTR,UCN3        |
| regulation of secretion by cell(5)                                        | 7.82E-04  | ABCC8,APOA1,ARNTL,ATP2A2,CADPS,CASP1,CHGA,G6PC2,GLP1R,HADH,ICA1,INHA,KRT20,MAOB,SCG5,SLC30A8,SNAP25,SPINK1,TRIM9,UCN3                  |
| signal release(5)                                                         | 7.82E-04  | ABCC8,ARNTL,ATP2A2,CADPS,G6PC2,GLP1R,HADH,ICA1,INHA,PTPRN,PTPRN2,SCG5,SLC30A8,SNAP25,TRIM9,UCN3                                        |
| hormone metabolic process(3)                                              | 1.07E-03  | ATP1A1,ATP6AP2,CPE,ERO1LB,HSD17B11,KCNMA1,PCSK1,PCSK2,SCG5,TTR                                                                         |
| hormone transport(5)                                                      | 1.07E-03  | ABCC8,ARNTL,G6PC2,GLP1R,HADH,ICA1,INHA,PTPRN,PTPRN2,SCG5,SLC30A8,SNAP25,TTR,UCN3                                                       |
| protein maturation(5)                                                     | 2.40E-03  | AGA,ATP6AP2,CASP1,CD55,CPE,CR1L,ERO1LB,GGT1,PCSK1,PCSK2,PSENEN,SCG5,XDH                                                                |
| hormone secretion(6)                                                      | 3.75E-03  | ABCC8,ARNTL,G6PC2,GLP1R,HADH,ICA1,INHA,PTPRN,PTPRN2,SCG5,SLC30A8,SNAP25,UCN3                                                           |
| protein processing(6)                                                     | 5.43E-03  | ATP6AP2,CASP1,CD55,CPE,CR1L,ERO1LB,GGT1,PCSK1,PCSK2,PSENEN,SCG5,XDH                                                                    |
| insulin secretion(6)                                                      | 9.31E-03  | ABCC8,ARNTL,G6PC2,GLP1R,HADH,ICA1,PTPRN,PTPRN2,SLC30A8,UCN3                                                                            |
| digestion(4)                                                              | 0.0096529 | APOA1,FABP1,FABP2,KCNMA1,MUC13,PLS1,SLC5A1,UCN3                                                                                        |
| peptide secretion(6)                                                      | 0.0104469 | ABCC8,ARNTL,CD74,G6PC2,GLP1R,HADH,ICA1,PTPRN,PTPRN2,SLC30A8,UCN3                                                                       |
| peptide transport(6)                                                      | 0.0104469 | ABCC8,ARNTL,CD74,CDH17,G6PC2,GLP1R,HADH,ICA1,PTPRN,PTPRN2,SLC30A8,UCN3                                                                 |
| fatty acid metabolic process(5)                                           | 0.0105527 | ACAA2,APOA1,CD74,CYP2C65,CYP2C66,CYP2C68,CYP2D26,CYP4F14,DGAT2,FABP1,FABP2,GGT1,HADH                                                   |
| antigen processing and presentation of exogenous antigen(4)               | 0.0108576 | AP3D1,B2M,CD74,H2-AA,H2-AB1                                                                                                            |
| intestinal absorption(5)                                                  | 0.0108576 | APOA1,FABP1,FABP2,PLS1,SLC5A1                                                                                                          |
| regulation of hormone secretion(4)                                        | 0.0108576 | ABCC8,ARNTL,G6PC2,GLP1R,HADH,ICA1,INHA,SCG5,SLC30A8,SNAP25,UCN3                                                                        |
| amide transport(5)                                                        | 0.0136476 | ABCC8,ARNTL,CD74,CDH17,G6PC2,GLP1R,HADH,ICA1,PTPRN,PTPRN2,SLC30A8,UCN3                                                                 |
| digestive system process(5)                                               | 0.0153102 | APOA1,FABP1,FABP2,KCNMA1,MUC13,PLS1,SLC5A1                                                                                             |
| single organism membrane organization(4)                                  | 0.019579  | ACAA2,AP3D1,ATP1B3,ATP2A2,ATP8B1,BSG,CDH1,CPE,GPR158,PIGR,PIK3R1,PLS1,SAMD9L,SNAP25,SOD1,SRP54A,TRIM9                                  |
| peptide hormone secretion(7)                                              | 0.0297201 | ABCC8,ARNTL,G6PC2,GLP1R,HADH,ICA1,PTPRN,PTPRN2,SLC30A8,UCN3                                                                            |
| response to organonitrogen compound(4)                                    | 0.0297201 | AKT3,ALDOB,APLP1,ATP2A2,CASP1,CDH1,GNAO1,GPD1,HSP90B1,MIR103-2,MIR421,MIR669C,PDGFD,PIK3R1,SELL,VKORC1                                 |
| response to metal ion(5)                                                  | 0.030642  | ABCC8,ALDOB,B2M,CDH1,KCNMA1,LCT,SLC30A8,SOD1,XDH                                                                                       |
| fatty acid derivative metabolic process(4)&icosanoid metabolic process(5) | 0.037621  | CD74,CYP2C65,CYP2C66,CYP2C68,CYP2D26,CYP4F14,GGT1                                                                                      |
| response to transition metal nanoparticle(4)                              | 0.037621  | ABCC8,ALDOB,B2M,LCT,SLC30A8,SOD1                                                                                                       |
| regulation of peptide secretion(6)                                        | 0.0391577 | ABCC8,ARNTL,CD74,G6PC2,GLP1R,HADH,ICA1,SLC30A8,UCN3                                                                                    |
| response to endoplasmic reticulum stress(5)                               | 0.0392982 | DNAJB9,DNAJC3,EDEM2,HSP90B1,P4HB,PIK3R1,SDF2L1,SERINC3,UFM1                                                                            |
| unsaturated fatty acid metabolic process(6)                               | 0.0449138 | CD74,CYP2C65,CYP2C66,CYP2C68,CYP2D26,CYP4F14,GGT1                                                                                      |
| regulation of insulin secretion(6)                                        | 0.0468611 | ABCC8,ARNTL,G6PC2,GLP1R,HADH,ICA1,SLC30A8,UCN3                                                                                         |
| response to drug(4)                                                       | 0.0468611 | ATP1A1,ATP8B1,CASP1,CYP2C65,CYP2C66,CYP2C68,CYP2D26,HADH,LCT,SOD1                                                                      |
| steroid metabolic process(5)                                              | 0.0499935 | APOA1,APOB,ATP1A1,ATP8B1,DGAT2,GC,HSD17B11,KCNMA1,MTTP,SOD1                                                                            |

| KEGG: Pathway Name                          | P-value    | Genes                                                                   |
|---------------------------------------------|------------|-------------------------------------------------------------------------|
| Carbohydrate digestion and absorption       | 3.34E-07   | AKT3,ATP1A1,ATP1B3,G6PC2,LCT,MGAM,PIK3R1,SIS,SLC5A1                     |
| Energy Metabolism                           | 6.56E-06   | ACAA2,AKP3,ALDOB,ALPI,CYP3A13,GALM,GAPDH-PS15,HADH,MCEE,MDH2,PAPSS2,XDH |
| Fat digestion and absorption                | 2.27E-05   | APOA1,APOB,DGAT2,FABP1,FABP2,MTTP,PLPP3                                 |
| Starch and sucrose metabolism               | 0.00173621 | ENPP3,G6PC2,MGAM,SIS,TREH,UGT2B34                                       |
| Type I diabetes mellitus                    | 0.00250559 | CPE,H2-AA,H2-AB1,ICA1,PTPRN,PTPRN2                                      |
| Ribosome                                    | 0.00511998 | GM11703,GM15501,RPL29,RPL31-PS12,RPL4,RPL1,RPS26,RPS6-PS4               |
| Alzheimer's disease                         | 0.00939374 | ATP2A2,ATP2A3,COX7A2,GAPDH-PS15,GM3873,MME,NDUFA1,PSENEN                |
| Insulin secretion                           | 9.39E-03   | ABCC8,ATP1A1,ATP1B3,GLP1R,KCNMA1,SNAP25                                 |
| Lysosome                                    | 9.39E-03   | AGA,AP3D1,CD164,CD63,CTSB,GNPTG,PSAP                                    |
| Protein processing in endoplasmic reticulum | 9.39E-03   | DNAJC3,EDEM2,ERO1LB,GM10177,HSP90B1,P4HB,RPN1,SSR2                      |
| Steroid hormone biosynthesis                | 0.00939374 | CYP2C65,CYP2C66,CYP2C68,CYP2D26,CYP3A13,UGT2B34                         |
| Serotonergic synapse                        | 0.0117866  | CYP2C65,CYP2C66,CYP2C68,CYP2D26,GNAO1,GNG12,MAOB                        |
| Galactose metabolism                        | 0.0148177  | G6PC2,LCT,MGAM,SIS                                                      |
| Pancreatic secretion                        | 0.0163437  | ATP1A1,ATP1B3,ATP2A2,ATP2A3,CLCA4B,KCNMA1                               |
| HIF-1 signaling pathway                     | 0.0227949  | AKT3,EGLN3,GAPDH-PS15,PIK3R1,RPS6-PS4,TCEB1                             |
| Influenza A                                 | 0.0317502  | AKT3,CASP1,DNAJC3,H2-AA,H2-AB1,IFNAR2,PIK3R1                            |
| PI3K-Akt signaling pathway                  | 0.0331565  | AKT3,CND2,G6PC2,GNG12,HSP90B1,IFNAR2,PDGFD,PGF,PIK3R1,RPS6-PS4          |
| Antigen processing and presentation         | 0.0363388  | B2M,CD74,CTSB,H2-AA,H2-AB1                                              |
| Retinol metabolism                          | 0.0427719  | CYP2C65,CYP2C66,CYP2C68,CYP3A13,UGT2B34                                 |
| Protein digestion and absorption            | 0.0474683  | ACE2,ATP1A1,ATP1B3,MME,SLC7A8                                           |
| Chemical carcinogenesis                     | 0.0499823  | CYP2C65,CYP2C66,CYP2C68,CYP3A13,UGT2B34                                 |
