# Supplementary material
Source: publisher figshare collection journal article supplement (https://diabetesjournals.figshare.com/articles/dataset/_/13103045)
Supplement: Supplementary file 2 [file 1]

Supplementary Table 3

## Differential islet gene expression at ZT 16 in Bmal1OV (HFD) vs. Control (HFD)

| Fold change vs. Control | GeneSymbol   | mRNA_Description                                                                                                                      |
|-------------------------|--------------|---------------------------------------------------------------------------------------------------------------------------------------|
| 81.95                   | Arntl        | Mus musculus aryl hydrocarbon receptor nuclear translocator-like (Arntl), transcript variant 2, mRNA.                                 |
| 21.20                   | Serpina3n    | Mus musculus serine (or cysteine) peptidase inhibitor, clade A, member 3N (Serpina3n), mRNA.                                          |
| 16.11                   | LOC100861894 | PREDICTED: uncharacterized LOC100861894 (LOC100861894), miscRNA.                                                                      |
| 13.23                   | Gm24112      | predicted gene, 24112 [gene_biotype:miRNA transcript_biotype:miRNA]                                                                   |
| 12.43                   | Reg3b        | Mus musculus regenerating islet-derived 3 beta (Reg3b), mRNA.                                                                         |
| 11.37                   | Gm25931      | predicted gene, 25931 [gene_biotype:miRNA transcript_biotype:miRNA]                                                                   |
| 11.20                   | Rgs4         | Mus musculus regulator of G-protein signaling 4 (Rgs4), mRNA.                                                                         |
| 8.81                    | ---          | Non-coding transcript identified by NONCODE: Sense No Exonic                                                                          |
| 8.67                    | Rgs2         | Mus musculus regulator of G-protein signaling 2 (Rgs2), mRNA.                                                                         |
| 8.58                    | ---          | Mus musculus non-coding RNA, oocyte_piRNA2380, complete sequence.                                                                     |
| 8.17                    | ---          | Mus musculus cDNA clone IMAGE:5123675.                                                                                                |
| 7.83                    | Serpina3h    | Mus musculus serine (or cysteine) peptidase inhibitor, clade A, member 3H (Serpina3h), non-coding RNA.                                |
| 7.28                    | Steap4       | Mus musculus STEAP family member 4 (Steap4), mRNA.                                                                                    |
| 6.85                    | Fam107a      | Mus musculus family with sequence similarity 107, member A (Fam107a), mRNA.                                                           |
| 6.26                    | Cebpd        | Mus musculus CCAAT/enhancer binding protein (C/EBP), delta (Cebpd), mRNA.                                                             |
| 6.17                    | ---          | Mus musculus piRNA piR-139743, complete sequence.                                                                                     |
| 5.98                    | Ccl28        | Mus musculus chemokine (C-C motif) ligand 28 (Ccl28), mRNA.                                                                           |
| 5.66                    | ---          | Non-coding transcript identified by NONCODE: Sense No Exonic                                                                          |
| 5.36                    | ---          | Non-coding transcript identified by NONCODE: Linc                                                                                     |
| 5.16                    | Cdkn1a       | Mus musculus cyclin-dependent kinase inhibitor 1A (P21) (Cdkn1a), transcript variant 2, mRNA.                                         |
| 5.07                    | ---          | Mus musculus non-coding RNA, oocyte_clustered_small_RNA7235, complete sequence.                                                       |
| 5.04                    | Reg3a        | Mus musculus regenerating islet-derived 3 alpha (Reg3a), mRNA.                                                                        |
| 5.03                    | Mir5128      | Mus musculus microRNA 5128 (Mir5128), microRNA.                                                                                       |
| 4.95                    | Serpina10    | Mus musculus serine (or cysteine) peptidase inhibitor, clade A (alpha-1 antiproteinase, antitrypsin), member 10 (Serpina10),          |
| 4.95                    | Gm23136      | predicted gene, 23136 [gene_biotype:snoRNA transcript_biotype:snoRNA]                                                                 |
| 4.93                    | Gm24264      | predicted gene, 24264 [gene_biotype:snoRNA transcript_biotype:snoRNA]                                                                 |
| 4.89                    | Mir3108      | Mus musculus microRNA 3108 (Mir3108), microRNA.                                                                                       |
| 4.82                    | Gm24041      | predicted gene, 24041 [gene_biotype:snoRNA transcript_biotype:snoRNA]                                                                 |
| 4.81                    | Gm25716      | predicted gene, 25716 [gene_biotype:snoRNA transcript_biotype:snoRNA]                                                                 |
| 4.80                    | ---          | Non-coding transcript identified by NONCODE: Antisense                                                                                |
| 4.55                    | Gm22067      | predicted gene, 22067 [gene_biotype:snoRNA transcript_biotype:snoRNA]                                                                 |
| 4.53                    | ---          | ensembl:novel scaffold:GRCm38:GL456233.1:25190:25788:1 gene:ENSMUSG00000090805 gene_biotype:                                          |
| 4.42                    | Gm25474      | predicted gene, 25474 [gene_biotype:snoRNA transcript_biotype:snoRNA]                                                                 |
| 4.42                    | Gm22047      | predicted gene, 22047 [gene_biotype:snoRNA transcript_biotype:snoRNA]                                                                 |
| 4.42                    | Gm23619      | predicted gene, 23619 [gene_biotype:snoRNA transcript_biotype:snoRNA]                                                                 |
| 4.39                    | Mir5123      | Mus musculus microRNA 5123 (Mir5123), microRNA.                                                                                       |
| 4.30                    | ---          | Non-coding transcript identified by NONCODE: Linc                                                                                     |
| 4.26                    | ---          | Non-coding transcript identified by NONCODE: Sense No Exonic                                                                          |
| 4.25                    | ---          | Mus musculus non-coding RNA, oocyte_clustered_small_RNA4296, complete sequence.                                                       |
| 4.25                    | ---          | Mus musculus non-coding RNA, oocyte_clustered_small_RNA6783, complete sequence.                                                       |
| 4.19                    | Thrsp        | Mus musculus thyroid hormone responsive (Thrsp), mRNA.                                                                                |
| 4.10                    | Scnn1g       | Mus musculus sodium channel, nonvoltage-gated 1 gamma (Scnn1g), mRNA.                                                                 |
| 4.08                    | Gm22584      | predicted gene, 22584 [gene_biotype:snoRNA transcript_biotype:snoRNA]                                                                 |
| 4.06                    | ---          | Non-coding transcript identified by NONCODE: Sense No Exonic                                                                          |
| 4.03                    | ---          | Non-coding transcript identified by NONCODE: Linc                                                                                     |
| 3.95                    | Nfkbiz       | Mus musculus nuclear factor of kappa light polypeptide gene enhancer in B cells inhibitor, zeta (Nfkbiz), transcript variant 2, mRNA. |
| 3.95                    | ---          | Non-coding transcript identified by NONCODE: Sense No Exonic                                                                          |
| 3.87                    | Gm6877       | predicted pseudogene 6877 [gene_biotype:processed_pseudogene transcript_biotype:processed_pseudogene]                                 |
| 3.86                    | ---          | Non-coding transcript identified by NONCODE: Sense No Exonic                                                                          |
| 3.84                    | Errfi1       | Mus musculus ERBB receptor feedback inhibitor 1 (Errfi1), mRNA.                                                                       |
| 3.79                    | ---          | Non-coding transcript identified by NONCODE: Sense No Exonic                                                                          |
| 3.72                    | Gadd45b      | Mus musculus growth arrest and DNA-damage-inducible 45 beta (Gadd45b), mRNA.                                                          |
| 3.68                    | Gm25350      | predicted gene, 25350 [gene_biotype:snoRNA transcript_biotype:snoRNA]                                                                 |
| 3.68                    | Gm22128      | predicted gene, 22128 [gene_biotype:snoRNA transcript_biotype:snoRNA]                                                                 |
| 3.68                    | Gm26246      | predicted gene, 26246 [gene_biotype:snoRNA transcript_biotype:snoRNA]                                                                 |
| 3.68                    | Gm25597      | predicted gene, 25597 [gene_biotype:snoRNA transcript_biotype:snoRNA]                                                                 |
| 3.68                    | Gm26201      | predicted gene, 26201 [gene_biotype:snoRNA transcript_biotype:snoRNA]                                                                 |
| 3.68                    | Gm22812      | predicted gene, 22812 [gene_biotype:snoRNA transcript_biotype:snoRNA]                                                                 |
| 3.68                    | Gm26433      | predicted gene, 26433 [gene_biotype:snoRNA transcript_biotype:snoRNA]                                                                 |
| 3.68                    | Gm23357      | predicted gene, 23357 [gene_biotype:snoRNA transcript_biotype:snoRNA]                                                                 |
| 3.68                    | Gm22110      | predicted gene, 22110 [gene_biotype:snoRNA transcript_biotype:snoRNA]                                                                 |
| 3.68                    | Gm23724      | predicted gene, 23724 [gene_biotype:snoRNA transcript_biotype:snoRNA]                                                                 |
| 3.68                    | Gm23549      | predicted gene, 23549 [gene_biotype:snoRNA transcript_biotype:snoRNA]                                                                 |
| 3.68                    | Gm26223      | predicted gene, 26223 [gene_biotype:snoRNA transcript_biotype:snoRNA]                                                                 |
| 3.68                    | Gm23524      | predicted gene, 23524 [gene_biotype:snoRNA transcript_biotype:snoRNA]                                                                 |
| 3.68                    | Gm26136      | predicted gene, 26136 [gene_biotype:snoRNA transcript_biotype:snoRNA]                                                                 |
| 3.68                    | Gm24658      | predicted gene, 24658 [gene_biotype:snoRNA transcript_biotype:snoRNA]                                                                 |
| 3.68                    | Gm23359      | predicted gene, 23359 [gene_biotype:snoRNA transcript_biotype:snoRNA]                                                                 |
| 3.68                    | Gm24742      | predicted gene, 24742 [gene_biotype:snoRNA transcript_biotype:snoRNA]                                                                 |
| 3.68                    | Gm23696      | predicted gene, 23696 [gene_biotype:snoRNA transcript_biotype:snoRNA]                                                                 |
| 3.68                    | Gm26094      | predicted gene, 26094 [gene_biotype:snoRNA transcript_biotype:snoRNA]                                                                 |

|      |               |                                                                                                            |
|------|---------------|------------------------------------------------------------------------------------------------------------|
| 3.64 | ---           | Non-coding transcript identified by NONCODE: Sense No Exonic                                               |
| 3.60 | ---           | Mus musculus non-coding RNA, oocyte clustered_small_RNA6127, complete sequence.                            |
| 3.59 | Gm25993       | predicted gene, 25993 [gene_biotype:miRNA transcript_biotype:miRNA]                                        |
| 3.59 | ---           | Non-coding transcript identified by NONCODE: Linc                                                          |
| 3.57 | Gm23089       | predicted gene, 23089 [gene_biotype:snoRNA transcript_biotype:snoRNA]                                      |
| 3.57 | Gm24711       | predicted gene, 24711 [gene_biotype:snoRNA transcript_biotype:snoRNA]                                      |
| 3.57 | Gm26188       | predicted gene, 26188 [gene_biotype:snoRNA transcript_biotype:snoRNA]                                      |
| 3.53 | Gm26502       | predicted gene, 26502 [gene_biotype:snoRNA transcript_biotype:snoRNA]                                      |
| 3.53 | Gm23313       | predicted gene, 23313 [gene_biotype:snoRNA transcript_biotype:snoRNA]                                      |
| 3.53 | Gm23446       | predicted gene, 23446 [gene_biotype:snoRNA transcript_biotype:snoRNA]                                      |
| 3.50 | Cyp39a1       | Mus musculus cytochrome P450, family 39, subfamily a, polypeptide 1 (Cyp39a1), transcript variant 2, mRNA. |
| 3.50 | S100a8        | Mus musculus S100 calcium binding protein A8 (calgranulin A) (S100a8), mRNA.                               |
| 3.49 | ---           | Non-coding transcript identified by Luo, et al.                                                            |
| 3.49 | Mir6541       | Mus musculus microRNA 6541 (Mir6541), microRNA.                                                            |
| 3.47 | ---           | Mus musculus non-coding RNA, oocyte clustered_small_RNA10462, complete sequence.                           |
| 3.47 | ---           | Non-coding transcript identified by Luo, et al.                                                            |
| 3.46 | ---           | Non-coding transcript identified by NONCODE: Sense No Exonic                                               |
| 3.46 | Serpina3i     | Mus musculus serine (or cysteine) peptidase inhibitor, clade A, member 3i (Serpina3i), mRNA.               |
| 3.45 | ---           | Non-coding transcript identified by NONCODE: Sense No Exonic                                               |
| 3.42 | ---           | Non-coding transcript identified by NONCODE: Sense No Exonic                                               |
| 3.42 | ---           | Non-coding transcript identified by NONCODE: Linc                                                          |
| 3.41 | ---           | Non-coding transcript identified by NONCODE: Sense No Exonic                                               |
| 3.40 | B230119M05Rik | Mus musculus RIKEN cDNA B230119M05 gene (B230119M05Rik), long non-coding RNA.                              |
| 3.37 | Snord11611    | small nucleolar RNA, C/D box 116-like 1 (Snord11611), small nucleolar RNA.                                 |
| 3.37 | Snord11611    | small nucleolar RNA, C/D box 116-like 1 (Snord11611), small nucleolar RNA.                                 |
| 3.37 | Snord11611    | small nucleolar RNA, C/D box 116-like 1 (Snord11611), small nucleolar RNA.                                 |
| 3.37 | Snord11611    | small nucleolar RNA, C/D box 116-like 1 (Snord11611), small nucleolar RNA.                                 |
| 3.37 | Snord11611    | small nucleolar RNA, C/D box 116-like 1 (Snord11611), small nucleolar RNA.                                 |
| 3.37 | Snord11611    | small nucleolar RNA, C/D box 116-like 1 (Snord11611), small nucleolar RNA.                                 |
| 3.37 | Snord11611    | small nucleolar RNA, C/D box 116-like 1 (Snord11611), small nucleolar RNA.                                 |
| 3.37 | Snord11611    | small nucleolar RNA, C/D box 116-like 1 (Snord11611), small nucleolar RNA.                                 |
| 3.37 | Snord11611    | Mus musculus small nucleolar RNA, C/D box 116-like 1 (Snord11611), small nucleolar RNA.                    |
| 3.37 | Snord11611    | small nucleolar RNA, C/D box 116-like 1 (Snord11611), small nucleolar RNA.                                 |
| 3.37 | Snord11612    | small nucleolar RNA, C/D box 116-like 2                                                                    |
| 3.37 | Snord11611    | small nucleolar RNA, C/D box 116-like 1                                                                    |
| 3.33 | ---           | Mus musculus non-coding RNA, oocyte clustered_small_RNA7174, complete sequence.                            |
| 3.33 | Gm26032       | predicted gene, 26032 [gene_biotype:snoRNA transcript_biotype:snoRNA]                                      |
| 3.33 | Gm22046       | predicted gene, 22046 [gene_biotype:snoRNA transcript_biotype:snoRNA]                                      |
| 3.33 | Gm25471       | predicted gene, 25471 [gene_biotype:snoRNA transcript_biotype:snoRNA]                                      |
| 3.33 | Gm25210       | predicted gene, 25210 [gene_biotype:snoRNA transcript_biotype:snoRNA]                                      |
| 3.33 | ---           | Non-coding transcript identified by NONCODE: Sense No Exonic                                               |
| 3.29 | Mir6928       | Mus musculus microRNA 6928 (Mir6928), microRNA.                                                            |
| 3.26 | Car8          | Mus musculus carbonic anhydrase 8 (Car8), mRNA.                                                            |
| 3.26 | Mir6399       | Mus musculus microRNA 6399 (Mir6399), microRNA.                                                            |
| 3.25 | Gm22188       | predicted gene, 22188 [gene_biotype:snoRNA transcript_biotype:snoRNA]                                      |
| 3.24 | ---           | Non-coding transcript identified by NONCODE: Linc                                                          |
| 3.22 | D730005E14Rik | Mus musculus RIKEN cDNA D730005E14 gene (D730005E14Rik), long non-coding RNA.                              |
| 3.22 | ---           | Non-coding transcript identified by NONCODE: Sense No Exonic                                               |
| 3.20 | Gm11588       | predicted gene 11588 [gene_biotype:lincRNA transcript_biotype:lincRNA]                                     |
| 3.19 | ---           | Non-coding transcript identified by NONCODE: Sense No Exonic                                               |
| 3.19 | 9130213A22Rik | RIKEN cDNA 9130213A22 gene                                                                                 |
| 3.18 | Mir3058       | Mus musculus microRNA 3058 (Mir3058), microRNA.                                                            |
| 3.17 | ---           | Non-coding transcript identified by NONCODE: Sense No Exonic                                               |
| 3.17 | Gm26446       | predicted gene, 26446 [gene_biotype:snRNA transcript_biotype:snRNA]                                        |
| 3.15 | ---           | Non-coding transcript identified by Luo, et al.                                                            |
| 3.12 | LOC100862096  | PREDICTED: uncharacterized LOC100862096 (LOC100862096), miscRNA.                                           |
| 3.11 | Reg3d         | Mus musculus regenerating islet-derived 3 delta (Reg3d), transcript variant 2, mRNA.                       |
| 3.10 | Gm23767       | predicted gene, 23767 [gene_biotype:snoRNA transcript_biotype:snoRNA]                                      |
| 3.10 | Ripk2         | Mus musculus receptor (TNFRSF)-interacting serine-threonine kinase 2 (Ripk2), mRNA.                        |
| 3.09 | Gm22631       | predicted gene, 22631 [gene_biotype:snoRNA transcript_biotype:snoRNA]                                      |
| 3.08 | Pex11a        | Mus musculus peroxisomal biogenesis factor 11 alpha (Pex11a), mRNA.                                        |
| 3.08 | ---           | Non-coding transcript identified by NONCODE: Sense No Exonic                                               |
| 3.07 | LOC100861976  | PREDICTED: uncharacterized LOC100861976, transcript variant 1 (LOC100861976), miscRNA.                     |
| 3.06 | ---           | Non-coding transcript identified by NONCODE: Sense No Exonic                                               |
| 3.06 | ---           | Non-coding transcript identified by NONCODE: Sense No Exonic                                               |
| 3.05 | ---           | Mus musculus RNA for germline small RNA gsRNA276, complete sequence.                                       |
| 3.04 | Ifit1         | Mus musculus interferon-induced protein with tetratricopeptide repeats 1 (Ifit1), mRNA.                    |
| 3.03 | ---           | Non-coding transcript identified by NONCODE: Sense No Exonic                                               |
| 3.03 | Gm13574       | predicted gene 13574 [gene_biotype:processed_pseudogene transcript_biotype:processed_pseudogene]           |
| 3.03 | Sox4          | Mus musculus SRY (sex determining region Y)-box 4 (Sox4), mRNA.                                            |
| 3.02 | Gm25074       | predicted gene, 25074 [gene_biotype:snoRNA transcript_biotype:snoRNA]                                      |
| 3.01 | Gm22173       | predicted gene, 22173 [gene_biotype:snoRNA transcript_biotype:snoRNA]                                      |
| 3.01 | ---           | Non-coding transcript identified by NONCODE: Linc                                                          |
| 3.01 | ---           | Non-coding transcript identified by NONCODE: Sense No Exonic                                               |
| 2.99 | LOC100862355  | PREDICTED: uncharacterized LOC100862355 (LOC100862355), miscRNA.                                           |
| 2.98 | Kcnf1         | Mus musculus potassium voltage-gated channel, subfamily F, member 1 (Kcnf1), mRNA.                         |
| 2.98 | Ighv1-77      | immunoglobulin heavy variable 1-77                                                                         |

|      |               |                                                                                                                        |
|------|---------------|------------------------------------------------------------------------------------------------------------------------|
| 2.97 | Gm25720       | predicted gene, 25720 [gene_biotype:snRNA transcript_biotype:snRNA]                                                    |
| 2.93 | Gm24336       | predicted gene, 24336 [gene_biotype:snoRNA transcript_biotype:snoRNA]                                                  |
| 2.93 | Gm25909       | predicted gene, 25909 [gene_biotype:snoRNA transcript_biotype:snoRNA]                                                  |
| 2.93 | Gm379         | predicted gene 379 [gene_biotype:protein_coding transcript_biotype:protein_coding]                                     |
| 2.92 | Ptpn1         | Mus musculus protein tyrosine phosphatase, non-receptor type 1 (Ptpn1), mRNA.                                          |
| 2.91 | ---           | Non-coding transcript identified by Luo, et al.                                                                        |
| 2.91 | Tacc2         | Mus musculus transforming, acidic coiled-coil containing protein 2 (Tacc2), transcript variant 3, mRNA.                |
| 2.91 | ---           | Non-coding transcript identified by NONCODE: Sense No Exonic                                                           |
| 2.90 | Junb          | Mus musculus jun B proto-oncogene (Junb), mRNA.                                                                        |
| 2.90 | Gm26366       | predicted gene, 26366 [gene_biotype:snoRNA transcript_biotype:snoRNA]                                                  |
| 2.89 | ---           | Non-coding transcript identified by Luo, et al.                                                                        |
| 2.88 | 4833438C02Rik | PREDICTED: RIKEN cDNA 4833438C02 gene, transcript variant 1 (4833438C02Rik), miscRNA.                                  |
| 2.86 | Gbp10         | Mus musculus guanylate-binding protein 10 (Gbp10), mRNA.                                                               |
| 2.86 | Gm15206       | predicted gene 15206 [gene_biotype:processed_pseudogene transcript_biotype:processed_pseudogene]                       |
| 2.86 | Gm22776       | predicted gene, 22776 [gene_biotype:snoRNA transcript_biotype:snoRNA]                                                  |
| 2.86 | ---           | Non-coding transcript identified by Luo, et al.                                                                        |
| 2.84 | ---           | Non-coding transcript identified by NONCODE: Sense No Exonic                                                           |
| 2.84 | Reg2          | Mus musculus regenerating islet-derived 2 (Reg2), mRNA.                                                                |
| 2.83 | ---           | Mus musculus non-coding RNA, oocyte_clustered_small_RNA5118, complete sequence.                                        |
| 2.83 | ---           | Mus musculus non-coding RNA, oocyte_clustered_small_RNA5118, complete sequence.                                        |
| 2.83 | ---           | Mus musculus non-coding RNA, oocyte_clustered_small_RNA5120, complete sequence.                                        |
| 2.83 | ---           | Mus musculus non-coding RNA, oocyte_clustered_small_RNA5120, complete sequence.                                        |
| 2.81 | Gm10047       | predicted gene 10047                                                                                                   |
| 2.81 | Gdpd3         | Mus musculus glycerophosphodiester phosphodiesterase domain containing 3 (Gdpd3), mRNA.                                |
| 2.80 | ---           | Non-coding transcript identified by Luo, et al.                                                                        |
| 2.80 | Gm14863       | predicted gene 14863 [gene_biotype:processed_pseudogene transcript_biotype:processed_pseudogene]                       |
| 2.79 | Gm13511       | predicted gene 13511 [gene_biotype:processed_pseudogene transcript_biotype:processed_pseudogene]                       |
| 2.79 | Gm26414       | predicted gene, 26414                                                                                                  |
| 2.78 | Gm16044       | predicted gene 16044 [gene_biotype:processed_pseudogene transcript_biotype:processed_pseudogene]                       |
| 2.78 | Gm25615       | predicted gene, 25615 [gene_biotype:snoRNA transcript_biotype:snoRNA]                                                  |
| 2.77 | ---           | Non-coding transcript identified by NONCODE: Sense No Exonic                                                           |
| 2.77 | Mt1           | Mus musculus metallothionein 1 (Mt1), mRNA.                                                                            |
| 2.77 | Gm23862       | predicted gene, 23862 [gene_biotype:snoRNA transcript_biotype:snoRNA]                                                  |
| 2.76 | Gm23953       | predicted gene, 23953 [gene_biotype:snoRNA transcript_biotype:snoRNA]                                                  |
| 2.76 | Gm26332       | predicted gene, 26332 [gene_biotype:snoRNA transcript_biotype:snoRNA]                                                  |
| 2.76 | Gm22863       | predicted gene, 22863 [gene_biotype:snoRNA transcript_biotype:snoRNA]                                                  |
| 2.76 | Gm24618       | predicted gene, 24618 [gene_biotype:snoRNA transcript_biotype:snoRNA]                                                  |
| 2.75 | Gm23589       | predicted gene, 23589 [gene_biotype:snRNA transcript_biotype:snRNA]                                                    |
| 2.75 | ---           | Mus musculus non-coding RNA, oocyte_clustered_small_RNA10459, complete sequence.                                       |
| 2.74 | ---           | Non-coding transcript identified by NONCODE: Linc                                                                      |
| 2.74 | ---           | Non-coding transcript identified by NONCODE: Sense No Exonic                                                           |
| 2.74 | Rtp4          | Mus musculus receptor transporter protein 4 (Rtp4), mRNA.                                                              |
| 2.74 | Gm20659       | predicted gene 20659 [gene_biotype:antisense transcript_biotype:antisense]                                             |
| 2.74 | Elf3          | Mus musculus E74-like factor 3 (Elf3), transcript variant 1, mRNA.                                                     |
| 2.73 | Fcgr4         | Mus musculus Fc receptor, IgG, low affinity IV (Fcgr4), mRNA.                                                          |
| 2.72 | Trib1         | Mus musculus tribbles homolog 1 (Drosophila) (Trib1), mRNA.                                                            |
| 2.72 | ---           | Non-coding transcript identified by NONCODE: Sense No Exonic                                                           |
| 2.72 | Tram2         | Mus musculus translocating chain-associating membrane protein 2 (Tram2), mRNA.                                         |
| 2.71 | ---           | Non-coding transcript identified by NONCODE: Antisense                                                                 |
| 2.71 | ---           | Non-coding transcript identified by NONCODE: Sense No Exonic                                                           |
| 2.70 | 2010110E17Rik | RIKEN cDNA 2010110E17 gene [gene_biotype:lincRNA transcript_biotype:lincRNA]                                           |
| 2.70 | Gm23734       | predicted gene, 23734 [gene_biotype:snoRNA transcript_biotype:snoRNA]                                                  |
| 2.70 | ---           | Non-coding transcript identified by Luo, et al.                                                                        |
| 2.68 | ---           | Non-coding transcript identified by NONCODE: Linc                                                                      |
| 2.68 | ---           | Non-coding transcript identified by NONCODE: Linc                                                                      |
| 2.68 | Scarna8       | Mus musculus small Cajal body-specific RNA 8 (Scarna8), guide RNA.                                                     |
| 2.68 | Hes7          | Mus musculus hairy and enhancer of split 7 (Drosophila) (Hes7), mRNA.                                                  |
| 2.67 | ---           | Non-coding transcript identified by NONCODE: Sense No Exonic                                                           |
| 2.67 | ---           | Non-coding transcript identified by NONCODE: Sense No Exonic                                                           |
| 2.67 | ---           | Non-coding transcript identified by NONCODE: Sense No Exonic                                                           |
| 2.66 | Arl9          | Mus musculus ADP-ribosylation factor-like 9 (Arl9), mRNA.                                                              |
| 2.66 | Nsg1          | Mus musculus neuron specific gene family member 1 (Nsg1), mRNA.                                                        |
| 2.65 | ---           | Mus musculus non-coding RNA, oocyte_piRNA3120, complete sequence.                                                      |
| 2.65 | ---           | Non-coding transcript identified by NONCODE: Sense No Exonic                                                           |
| 2.64 | Apobec3       | Mus musculus apolipoprotein B mRNA editing enzyme, catalytic polypeptide 3 (Apobec3), transcript variant 1, mRNA.      |
| 2.64 | Hddc3         | Mus musculus HD domain containing 3 (Hddc3), mRNA.                                                                     |
| 2.64 | Alpk1         | Mus musculus alpha-kinase 1 (Alpk1), mRNA.                                                                             |
| 2.63 | Gm16462       | predicted gene 16462                                                                                                   |
| 2.63 | ---           | Mus musculus non-coding RNA, oocyte_clustered_small_RNA10430, complete sequence.                                       |
| 2.63 | ---           | Mus musculus non-coding RNA, oocyte_clustered_small_RNA4866, complete sequence.                                        |
| 2.62 | Gm22519       | predicted gene, 22519 [gene_biotype:snoRNA transcript_biotype:snoRNA]                                                  |
| 2.62 | ---           | Non-coding transcript identified by NONCODE: Sense No Exonic                                                           |
| 2.62 | ---           | Non-coding transcript identified by NONCODE: Sense No Exonic                                                           |
| 2.62 | ---           | Non-coding transcript identified by NONCODE: Sense No Exonic                                                           |
| 2.62 | Vmn2r-ps18    | vomer nasal 2, receptor, pseudogene 18 [gene_biotype:unprocessed_pseudogene transcript_biotype:unprocessed_pseudogene] |
| 2.62 | Gm11914       | predicted gene 11914 [gene_biotype:processed_pseudogene transcript_biotype:processed_pseudogene]                       |

|      |               |                                                                                                                  |
|------|---------------|------------------------------------------------------------------------------------------------------------------|
| 2.61 | Gm25831       | predicted gene, 25831 [gene_biotype:snRNA transcript_biotype:snRNA]                                              |
| 2.60 | ---           | Non-coding transcript identified by NONCODE: Sense No Exonic                                                     |
| 2.59 | ---           | Non-coding transcript identified by Luo, et al.                                                                  |
| 2.59 | ---           | Non-coding transcript identified by NONCODE: Linc                                                                |
| 2.58 | LOC100861833  | PREDICTED: uncharacterized LOC100861833 (LOC100861833), miscRNA.                                                 |
| 2.57 | ---           | Non-coding transcript identified by NONCODE: Sense No Exonic                                                     |
| 2.57 | ---           | Non-coding transcript identified by NONCODE: Sense No Exonic                                                     |
| 2.57 | 5830444B04Rik | Mus musculus RIKEN cDNA 5830444B04 gene (5830444B04Rik), transcript variant 1, long non-coding RNA.              |
| 2.56 | Gm15747       | predicted gene 15747 [gene_biotype:antisense transcript_biotype:antisense]                                       |
| 2.55 | ---           | Non-coding transcript identified by NONCODE: Linc                                                                |
| 2.55 | ---           | Non-coding transcript identified by NONCODE: Sense No Exonic                                                     |
| 2.55 | LOC100862325  | PREDICTED: uncharacterized LOC100862325 (LOC100862325), miscRNA.                                                 |
| 2.52 | Areg          | Mus musculus amphiregulin (Areg), mRNA.                                                                          |
| 2.52 | ---           | Non-coding transcript identified by NONCODE: Sense No Exonic                                                     |
| 2.51 | Gadd45g       | Mus musculus growth arrest and DNA-damage-inducible 45 gamma (Gadd45g), mRNA.                                    |
| 2.51 | ---           | Non-coding transcript identified by NONCODE: Sense No Exonic                                                     |
| 2.51 | ---           | Non-coding transcript identified by NONCODE: Sense No Exonic                                                     |
| 2.51 | ---           | Non-coding transcript identified by NONCODE: Sense No Exonic                                                     |
| 2.50 | Gm20195       | PREDICTED: predicted gene, 20195 (Gm20195), miscRNA.                                                             |
| 2.50 | ---           | Non-coding transcript identified by NONCODE: Sense No Exonic                                                     |
| 2.49 | Zbtb16        | Mus musculus zinc finger and BTB domain containing 16 (Zbtb16), mRNA.                                            |
| 2.49 | Gm25157       | predicted gene, 25157 [gene_biotype:snoRNA transcript_biotype:snoRNA]                                            |
| 2.49 | Gm22941       | predicted gene, 22941 [gene_biotype:snoRNA transcript_biotype:snoRNA]                                            |
| 2.49 | Gm22258       | predicted gene, 22258 [gene_biotype:snoRNA transcript_biotype:snoRNA]                                            |
| 2.49 | Zfp455        | Mus musculus zinc finger protein 455 (Zfp455), mRNA.                                                             |
| 2.49 | Gm19522       | Mus musculus predicted gene, 19522 (Gm19522), long non-coding RNA.                                               |
| 2.48 | ---           | Non-coding transcript identified by NONCODE: Sense No Exonic                                                     |
| 2.48 | Gm4899        | predicted gene 4899 [gene_biotype:processed_pseudogene transcript_biotype:processed_pseudogene]                  |
| 2.48 | Gm22613       | predicted gene, 22613                                                                                            |
| 2.48 | ---           | Non-coding transcript identified by NONCODE: Linc                                                                |
| 2.48 | ---           | Non-coding transcript identified by NONCODE: Sense No Exonic                                                     |
| 2.48 | ---           | Non-coding transcript identified by Luo, et al.                                                                  |
| 2.47 | ---           | Non-coding transcript identified by NONCODE: Antisense                                                           |
| 2.47 | Nfkb1a        | Mus musculus nuclear factor of kappa light polypeptide gene enhancer in B cells inhibitor, alpha (Nfkb1a), mRNA. |
| 2.46 | ---           | Non-coding transcript identified by NONCODE: Linc                                                                |
| 2.46 | ---           | Non-coding transcript identified by Luo, et al.                                                                  |
| 2.46 | ---           | Non-coding transcript identified by NONCODE: Linc                                                                |
| 2.46 | ---           | Non-coding transcript identified by NONCODE: Linc                                                                |
| 2.46 | ---           | Non-coding transcript identified by NONCODE: Sense No Exonic                                                     |
| 2.45 | Ddit4         | Mus musculus DNA-damage-inducible transcript 4 (Ddit4), mRNA.                                                    |
| 2.45 | ---           | Non-coding transcript identified by Luo, et al.                                                                  |
| 2.43 | Gm9948        | PREDICTED: predicted gene 9948 (Gm9948), miscRNA.                                                                |
| 2.43 | ---           | Non-coding transcript identified by Luo, et al.                                                                  |
| 2.43 | Kcnj13        | Mus musculus potassium inwardly-rectifying channel, subfamily J, member 13 (Kcnj13), mRNA.                       |
| 2.42 | Hmgn5         | Mus musculus high-mobility group nucleosome binding domain 5 (Hmgn5), mRNA.                                      |
| 2.42 | ---           | Non-coding transcript identified by NONCODE: Antisense                                                           |
| 2.42 | ---           | Non-coding transcript identified by Luo, et al.                                                                  |
| 2.42 | ---           | Non-coding transcript identified by NONCODE: Antisense                                                           |
| 2.42 | ---           | Non-coding transcript identified by NONCODE: Linc                                                                |
| 2.42 | ---           | Non-coding transcript identified by NONCODE: Sense No Exonic                                                     |
| 2.42 | ---           | Non-coding transcript identified by NONCODE: Linc                                                                |
| 2.42 | Gm24926       | predicted gene, 24926 [gene_biotype:snoRNA transcript_biotype:snoRNA]                                            |
| 2.42 | Gm22632       | predicted gene, 22632 [gene_biotype:snoRNA transcript_biotype:snoRNA]                                            |
| 2.41 | Gm10805       | predicted gene 10805 [gene_biotype:pseudogene transcript_biotype:pseudogene]                                     |
| 2.41 | ---           | Non-coding transcript identified by NONCODE: Sense No Exonic                                                     |
| 2.41 | ---           | Non-coding transcript identified by NONCODE: Sense No Exonic                                                     |
| 2.41 | Gm20692       | predicted gene 20692 [gene_biotype:antisense transcript_biotype:antisense]                                       |
| 2.40 | ---           | Non-coding transcript identified by NONCODE: Sense No Exonic                                                     |
| 2.40 | ---           | Non-coding transcript identified by NONCODE: Sense No Exonic                                                     |
| 2.40 | Ppil6         | Mus musculus peptidylprolyl isomerase (cyclophilin)-like 6 (Ppil6), mRNA.                                        |
| 2.40 | Mettl7a1      | Mus musculus methyltransferase like 7A1 (Mettl7a1), mRNA.                                                        |
| 2.40 | Mt2           | Mus musculus metallothionein 2 (Mt2), mRNA.                                                                      |
| 2.39 | 1700092M07Rik | Mus musculus RIKEN cDNA 1700092M07 gene (1700092M07Rik), mRNA.                                                   |
| 2.39 | ---           | Non-coding transcript identified by NONCODE: Sense No Exonic                                                     |
| 2.38 | Snx10         | Mus musculus sorting nexin 10 (Snx10), transcript variant 2, mRNA.                                               |
| 2.38 | ---           | Non-coding transcript identified by NONCODE: Linc                                                                |
| 2.38 | Gm25944       | predicted gene, 25944 [gene_biotype:snoRNA transcript_biotype:snoRNA]                                            |
| 2.38 | ---           | Non-coding transcript identified by NONCODE: Sense No Exonic                                                     |
| 2.38 | ---           | Non-coding transcript identified by NONCODE: Sense No Exonic                                                     |
| 2.37 | Igkv5-45      | immunoglobulin kappa chain variable 5-45                                                                         |
| 2.37 | ---           | Non-coding transcript identified by NONCODE: Sense No Exonic                                                     |
| 2.37 | ---           | Non-coding transcript identified by NONCODE: Sense No Exonic                                                     |
| 2.37 | ---           | Non-coding transcript identified by Luo, et al.                                                                  |
| 2.37 | Gbp7          | Mus musculus guanylate binding protein 7 (Gbp7), transcript variant 2, mRNA.                                     |
| 2.37 | ---           | Non-coding transcript identified by NONCODE: Linc                                                                |
| 2.36 | ---           | Mus musculus non-coding RNA, oocyte_clustered_small_RNA4337, complete sequence.                                  |

|      |               |                                                                                                    |
|------|---------------|----------------------------------------------------------------------------------------------------|
| 2.36 | ---           | Mus musculus non-coding RNA, oocyte clustered_small RNA4337, complete sequence.                    |
| 2.36 | ---           | Mus musculus non-coding RNA, oocyte_piRNA3120, complete sequence.                                  |
| 2.36 | ---           | Mus musculus non-coding RNA, oocyte clustered_small RNA4337, complete sequence.                    |
| 2.36 | LOC100862001  | PREDICTED: uncharacterized LOC100862001 (LOC100862001), miscRNA.                                   |
| 2.36 | ---           | Non-coding transcript identified by Luo, et al.                                                    |
| 2.36 | ---           | Non-coding transcript identified by NONCODE: Antisense                                             |
| 2.36 | Rfc4          | Mus musculus replication factor C (activator 1) 4 (Rfc4), mRNA.                                    |
| 2.36 | Vnn3          | Mus musculus vanin 3 (Vnn3), mRNA.                                                                 |
| 2.35 | S100a9        | Mus musculus S100 calcium binding protein A9 (calgranulin B) (S100a9), transcript variant 1, mRNA. |
| 2.35 | ---           | Non-coding transcript identified by NONCODE: Sense No Exonic                                       |
| 2.35 | ---           | Non-coding transcript identified by NONCODE: Sense No Exonic                                       |
| 2.35 | ---           | Non-coding transcript identified by NONCODE: Sense No Exonic                                       |
| 2.35 | ---           | Non-coding transcript identified by NONCODE: Sense No Exonic                                       |
| 2.35 | ---           | Mus musculus non-coding RNA, oocyte clustered_small RNA1948, complete sequence.                    |
| 2.35 | C2cd4b        | Mus musculus C2 calcium-dependent domain containing 4B (C2cd4b), mRNA.                             |
| 2.34 | ---           | Non-coding transcript identified by NONCODE: Sense No Exonic                                       |
| 2.34 | ---           | Non-coding transcript identified by NONCODE: Linc                                                  |
| 2.34 | ---           | Non-coding transcript identified by NONCODE: Linc                                                  |
| 2.34 | Gm19351       | PREDICTED: predicted gene, 19351 (Gm19351), miscRNA.                                               |
| 2.34 | ---           | Non-coding transcript identified by NONCODE: Sense No Exonic                                       |
| 2.33 | ---           | Non-coding transcript identified by NONCODE: Sense No Exonic                                       |
| 2.33 | Gm23245       | predicted gene, 23245 [gene_biotype:snoRNA transcript_biotype:snoRNA]                              |
| 2.33 | Clec2d        | Mus musculus C-type lectin domain family 2, member d (Clec2d), mRNA.                               |
| 2.33 | ---           | Non-coding transcript identified by NONCODE: Antisense                                             |
| 2.33 | ---           | Non-coding transcript identified by NONCODE: Sense No Exonic                                       |
| 2.33 | Zfp389        | Mus musculus zinc finger protein 389 (Zfp389), non-coding RNA.                                     |
| 2.33 | ---           | Non-coding transcript identified by NONCODE: Sense No Exonic                                       |
| 2.32 | Dnph1         | Mus musculus 2-deoxynucleoside 5-phosphate N-hydrolase 1 (Dnph1), mRNA.                            |
| 2.32 | ---           | Non-coding transcript identified by NONCODE: Linc                                                  |
| 2.32 | ---           | Non-coding transcript identified by NONCODE: Sense No Exonic                                       |
| 2.32 | ---           | Non-coding transcript identified by NONCODE: Linc                                                  |
| 2.31 | ---           | Non-coding transcript identified by NONCODE: Sense No Exonic                                       |
| 2.31 | ---           | Non-coding transcript identified by NONCODE: Antisense                                             |
| 2.31 | 2610507I01Rik | Mus musculus RIKEN cDNA 2610507I01 gene (2610507I01Rik), long non-coding RNA.                      |
| 2.31 | ---           | Mus musculus RNA for germline small RNA gsRNA194, complete sequence.                               |
| 2.31 | ---           | Non-coding transcript identified by NONCODE: Sense No Exonic                                       |
| 2.31 | Mir694        | Mus musculus microRNA 694 (Mir694), microRNA.                                                      |
| 2.30 | Gm10416       | Mus musculus predicted pseudogene 10416 (Gm10416), non-coding RNA.                                 |
| 2.30 | Hist1h3f      | Mus musculus histone cluster 1, H3f (Hist1h3f), mRNA.                                              |
| 2.30 | ---           | Non-coding transcript identified by NONCODE: Sense No Exonic                                       |
| 2.30 | Mdm1          | Mus musculus transformed mouse 3T3 cell double minute 1 (Mdm1), transcript variant 3, mRNA.        |
| 2.30 | Adora2b       | Mus musculus adenosine A2b receptor (Adora2b), mRNA.                                               |
| 2.30 | ---           | Non-coding transcript identified by NONCODE: Linc                                                  |
| 2.29 | ---           | Non-coding transcript identified by NONCODE: Sense No Exonic                                       |
| 2.29 | Ifngr2        | Mus musculus interferon gamma receptor 2 (Ifngr2), mRNA.                                           |
| 2.29 | ---           | Non-coding transcript identified by NONCODE: Linc                                                  |
| 2.29 | ---           | Non-coding transcript identified by NONCODE: Sense No Exonic                                       |
| 2.29 | Olf1030       | Mus musculus olfactory receptor 1030 (Olf1030), mRNA.                                              |
| 2.29 | Gm24866       | predicted gene, 24866 [gene_biotype:snoRNA transcript_biotype:snoRNA]                              |
| 2.29 | Gm25463       | predicted gene, 25463 [gene_biotype:snoRNA transcript_biotype:snoRNA]                              |
| 2.29 | Gm24528       | predicted gene, 24528 [gene_biotype:snoRNA transcript_biotype:snoRNA]                              |
| 2.29 | Gm23356       | predicted gene, 23356 [gene_biotype:snoRNA transcript_biotype:snoRNA]                              |
| 2.29 | Gm24872       | predicted gene, 24872 [gene_biotype:snoRNA transcript_biotype:snoRNA]                              |
| 2.29 | Gm24027       | predicted gene, 24027 [gene_biotype:snoRNA transcript_biotype:snoRNA]                              |
| 2.29 | Gm22524       | predicted gene, 22524 [gene_biotype:snoRNA transcript_biotype:snoRNA]                              |
| 2.29 | Gm22630       | predicted gene, 22630 [gene_biotype:snoRNA transcript_biotype:snoRNA]                              |
| 2.29 | Gm25741       | predicted gene, 25741 [gene_biotype:snoRNA transcript_biotype:snoRNA]                              |
| 2.29 | Gm26059       | predicted gene, 26059 [gene_biotype:snoRNA transcript_biotype:snoRNA]                              |
| 2.29 | Gm22511       | predicted gene, 22511 [gene_biotype:snoRNA transcript_biotype:snoRNA]                              |
| 2.29 | Gm25098       | predicted gene, 25098 [gene_biotype:snoRNA transcript_biotype:snoRNA]                              |
| 2.29 | Gm24702       | predicted gene, 24702 [gene_biotype:snoRNA transcript_biotype:snoRNA]                              |
| 2.29 | Gm25462       | predicted gene, 25462 [gene_biotype:snoRNA transcript_biotype:snoRNA]                              |
| 2.29 | Gm25523       | predicted gene, 25523 [gene_biotype:snoRNA transcript_biotype:snoRNA]                              |
| 2.29 | Gm22909       | predicted gene, 22909 [gene_biotype:snoRNA transcript_biotype:snoRNA]                              |
| 2.29 | Gm26392       | predicted gene, 26392 [gene_biotype:snoRNA transcript_biotype:snoRNA]                              |
| 2.29 | Gm24219       | predicted gene, 24219 [gene_biotype:snoRNA transcript_biotype:snoRNA]                              |
| 2.29 | Gm25230       | predicted gene, 25230 [gene_biotype:snoRNA transcript_biotype:snoRNA]                              |
| 2.29 | Gm22627       | predicted gene, 22627 [gene_biotype:snoRNA transcript_biotype:snoRNA]                              |
| 2.29 | Gm24585       | predicted gene, 24585 [gene_biotype:snoRNA transcript_biotype:snoRNA]                              |
| 2.29 | Gm24206       | predicted gene, 24206 [gene_biotype:snoRNA transcript_biotype:snoRNA]                              |
| 2.29 | Gm25209       | predicted gene, 25209 [gene_biotype:snoRNA transcript_biotype:snoRNA]                              |
| 2.29 | Gm26334       | predicted gene, 26334 [gene_biotype:snoRNA transcript_biotype:snoRNA]                              |
| 2.29 | Gm25742       | predicted gene, 25742 [gene_biotype:snoRNA transcript_biotype:snoRNA]                              |
| 2.29 | Gm25146       | predicted gene, 25146 [gene_biotype:snoRNA transcript_biotype:snoRNA]                              |
| 2.29 | Gm24759       | predicted gene, 24759 [gene_biotype:snoRNA transcript_biotype:snoRNA]                              |
| 2.29 | Gm23575       | predicted gene, 23575 [gene_biotype:snoRNA transcript_biotype:snoRNA]                              |

|      |               |                                                                                                                          |
|------|---------------|--------------------------------------------------------------------------------------------------------------------------|
| 2.29 | Gm22449       | predicted gene, 22449 [gene_biotype:snoRNA transcript_biotype:snoRNA]                                                    |
| 2.29 | Gm22912       | predicted gene, 22912 [gene_biotype:snoRNA transcript_biotype:snoRNA]                                                    |
| 2.29 | Gm25710       | predicted gene, 25710 [gene_biotype:snoRNA transcript_biotype:snoRNA]                                                    |
| 2.29 | Gm26434       | predicted gene, 26434 [gene_biotype:snoRNA transcript_biotype:snoRNA]                                                    |
| 2.29 | Gm23560       | predicted gene, 23560 [gene_biotype:snoRNA transcript_biotype:snoRNA]                                                    |
| 2.29 | Mars2         | Mus musculus methionine-tRNA synthetase 2 (mitochondrial) (Mars2), mRNA.                                                 |
| 2.29 | ---           | Non-coding transcript identified by NONCODE: Sense No Exonic                                                             |
| 2.29 | ---           | Non-coding transcript identified by NONCODE: Antisense                                                                   |
| 2.29 | ---           | Non-coding transcript identified by Luo, et al.                                                                          |
| 2.28 | ---           | Non-coding transcript identified by Luo, et al.                                                                          |
| 2.28 | ---           | Non-coding transcript identified by Luo, et al.                                                                          |
| 2.28 | Fam69a        | Mus musculus family with sequence similarity 69, member A (Fam69a), mRNA.                                                |
| 2.28 | ---           | Non-coding transcript identified by NONCODE: Antisense                                                                   |
| 2.27 | Gm5582        | predicted gene 5582 [gene_biotype:processed_pseudogene transcript_biotype:processed_pseudogene]                          |
| 2.27 | ---           | Non-coding transcript identified by Luo, et al.                                                                          |
| 2.27 | Oas2          | Mus musculus 2-5 oligoadenylate synthetase 2 (Oas2), mRNA.                                                               |
| 2.27 | ---           | Non-coding transcript identified by Luo, et al.                                                                          |
| 2.27 | Mir6998       | Mus musculus microRNA 6998 (Mir6998), microRNA.                                                                          |
| 2.27 | ---           | Non-coding transcript identified by NONCODE: Sense No Exonic                                                             |
| 2.27 | ---           | Non-coding transcript identified by NONCODE: Antisense                                                                   |
| 2.26 | Cry2          | cryptochrome 2 (photolyase-like)                                                                                         |
| 2.26 | ---           | Non-coding transcript identified by NONCODE: Sense No Exonic                                                             |
| 2.26 | ---           | Non-coding transcript identified by NONCODE: Sense No Exonic                                                             |
| 2.26 | Gm19462       | PREDICTED: predicted gene, 19462 (Gm19462), miscRNA.                                                                     |
| 2.26 | ---           | Non-coding transcript identified by NONCODE: Sense No Exonic                                                             |
| 2.25 | ---           | Non-coding transcript identified by NONCODE: Sense No Exonic                                                             |
| 2.25 | Gm22105       | predicted gene, 22105 [gene_biotype:snRNA transcript_biotype:snRNA]                                                      |
| 2.25 | Gm15539       | predicted gene 15539 [gene_biotype:processed_pseudogene transcript_biotype:processed_pseudogene]                         |
| 2.25 | Obox3-ps7     | oocyte specific homeobox 3, pseudogene 7 [gene_biotype:unprocessed_pseudogene transcript_biotype:unprocessed_pseudogene] |
| 2.25 | LOC100861674  | PREDICTED: uncharacterized LOC100861674 (LOC100861674), miscRNA.                                                         |
| 2.24 | ---           | Non-coding transcript identified by NONCODE: Sense No Exonic                                                             |
| 2.24 | ---           | Mus musculus non-coding RNA, oocyte clustered small RNA1546, complete sequence.                                          |
| 2.24 | Gm8783        | predicted pseudogene 8783 [gene_biotype:processed_pseudogene transcript_biotype:processed_pseudogene]                    |
| 2.24 | Gm15801       | predicted gene 15801 [gene_biotype:processed_pseudogene transcript_biotype:processed_pseudogene]                         |
| 2.24 | ---           | Non-coding transcript identified by NONCODE: Linc                                                                        |
| 2.24 | ---           | Non-coding transcript identified by NONCODE: Antisense                                                                   |
| 2.24 | ---           | Mus musculus non-coding RNA, oocyte piRNA3120, complete sequence.                                                        |
| 2.24 | ---           | Non-coding transcript identified by NONCODE: Sense No Exonic                                                             |
| 2.23 | ---           | Non-coding transcript identified by NONCODE: Sense No Exonic                                                             |
| 2.23 | ---           | Non-coding transcript identified by NONCODE: Linc                                                                        |
| 2.23 | ---           | Non-coding transcript identified by NONCODE: Linc                                                                        |
| 2.23 | Gm26554       | predicted gene, 26554 [gene_biotype:lincRNA transcript_biotype:lincRNA]                                                  |
| 2.23 | Hsph1         | Mus musculus heat shock 105kDa/110kDa protein 1 (Hsph1), mRNA.                                                           |
| 2.23 | ---           | Non-coding transcript identified by Luo, et al.                                                                          |
| 2.22 | ---           | Non-coding transcript identified by Luo, et al.                                                                          |
| 2.22 | ---           | Non-coding transcript identified by NONCODE: Linc                                                                        |
| 2.22 | ---           | Non-coding transcript identified by NONCODE: Sense No Exonic                                                             |
| 2.22 | LOC100862033  | PREDICTED: uncharacterized LOC100862033 (LOC100862033), miscRNA.                                                         |
| 2.22 | Ighv7-2       | immunoglobulin heavy variable 7-2                                                                                        |
| 2.22 | Gm11114       | predicted gene 11114 [gene_biotype:protein_coding transcript_biotype:protein_coding]                                     |
| 2.22 | ---           | Non-coding transcript identified by Luo, et al.                                                                          |
| 2.22 | Gm24799       | predicted gene, 24799 [gene_biotype:snoRNA transcript_biotype:snoRNA]                                                    |
| 2.21 | 4833419F23Rik | Mus musculus RIKEN cDNA 4833419F23 gene (4833419F23Rik), long non-coding RNA.                                            |
| 2.21 | ---           | Mus musculus piRNA piR-18275, complete sequence.                                                                         |
| 2.21 | Gm22834       | predicted gene, 22834 [gene_biotype:snoRNA transcript_biotype:snoRNA]                                                    |
| 2.21 | ---           | Non-coding transcript identified by NONCODE: Linc                                                                        |
| 2.21 | ---           | Non-coding transcript identified by NONCODE: Linc                                                                        |
| 2.21 | Hist1h4h      | Mus musculus histone cluster 1, H4h (Hist1h4h), mRNA.                                                                    |
| 2.20 | ---           | Non-coding transcript identified by NONCODE: Linc                                                                        |
| 2.20 | P2ry1         | Mus musculus purinergic receptor P2Y, G-protein coupled 1 (P2ry1), transcript variant 2, mRNA.                           |
| 2.20 | ---           | Non-coding transcript identified by NONCODE: Linc                                                                        |
| 2.20 | Rrm1          | Mus musculus ribonucleotide reductase M1 (Rrm1), mRNA.                                                                   |
| 2.20 | ---           | Non-coding transcript identified by NONCODE: Linc                                                                        |
| 2.20 | Crybb3        | Mus musculus crystallin, beta B3 (Crybb3), transcript variant 2, mRNA.                                                   |
| 2.20 | Psmb10        | Mus musculus proteasome (prosome, macropain) subunit, beta type 10 (Psmb10), mRNA.                                       |
| 2.19 | ---           | Non-coding transcript identified by NONCODE: Sense No Exonic                                                             |
| 2.19 | ---           | Non-coding transcript identified by NONCODE: Sense No Exonic                                                             |
| 2.18 | ---           | Mus musculus RNA for germline small RNA gsRNA264, complete sequence.                                                     |
| 2.18 | Gm25109       | predicted gene, 25109 [gene_biotype:miRNA transcript_biotype:miRNA]                                                      |
| 2.18 | Slc7a5        | Mus musculus solute carrier family 7 (cationic amino acid transporter, y+ system), member 5 (Slc7a5), mRNA.              |
| 2.18 | Gm22851       | predicted gene, 22851 [gene_biotype:snoRNA transcript_biotype:snoRNA]                                                    |
| 2.18 | ---           | Non-coding transcript identified by NONCODE: Sense No Exonic                                                             |
| 2.17 | Gm25076       | predicted gene, 25076 [gene_biotype:snoRNA transcript_biotype:snoRNA]                                                    |
| 2.17 | ---           | Non-coding transcript identified by NONCODE: Sense No Exonic                                                             |
| 2.17 | ---           | Non-coding transcript identified by NONCODE: Sense No Exonic                                                             |
| 2.17 | Gm24776       | predicted gene, 24776 [gene_biotype:snRNA transcript_biotype:snRNA]                                                      |

|      |               |                                                                                                                          |
|------|---------------|--------------------------------------------------------------------------------------------------------------------------|
| 2.17 | Gtbbp10       | Mus musculus GTP-binding protein 10 (putative) (Gtbbp10), mRNA.                                                          |
| 2.17 | Pcdhb16       | Mus musculus protocadherin beta 16 (Pcdhb16), mRNA.                                                                      |
| 2.16 | Gm11893       | predicted gene 11893 [gene_biotype:processed_pseudogene transcript_biotype:processed_pseudogene]                         |
| 2.16 | Csf1          | Mus musculus colony stimulating factor 1 (macrophage) (Csf1), transcript variant 2, mRNA.                                |
| 2.16 | Gm19722       | PREDICTED: predicted gene, 19722 (Gm19722), miscRNA.                                                                     |
| 2.16 | Mir3962       | microRNA 3962                                                                                                            |
| 2.16 | Serping1      | Mus musculus serine (or cysteine) peptidase inhibitor, clade G, member 1 (Serping1), mRNA.                               |
| 2.16 | Med4          | Mus musculus mediator complex subunit 4 (Med4), mRNA.                                                                    |
| 2.16 | Hist1h3e      | Mus musculus histone cluster 1, H3e (Hist1h3e), mRNA.                                                                    |
| 2.16 | Gm23141       | predicted gene, 23141 [gene_biotype:snoRNA transcript_biotype:snoRNA]                                                    |
| 2.16 | ---           | Non-coding transcript identified by NONCODE: Sense No Exonic                                                             |
| 2.15 | ---           | Non-coding transcript identified by NONCODE: Sense No Exonic                                                             |
| 2.15 | ---           | Non-coding transcript identified by NONCODE: Linc                                                                        |
| 2.15 | Nr1d1         | Mus musculus nuclear receptor subfamily 1, group D, member 1 (Nr1d1), mRNA.                                              |
| 2.15 | ---           | Non-coding transcript identified by NONCODE: Sense No Exonic                                                             |
| 2.15 | Serpina3f     | Mus musculus serine (or cysteine) peptidase inhibitor, clade A, member 3F (Serpina3f), transcript variant 2, mRNA.       |
| 2.15 | ---           | Non-coding transcript identified by NONCODE: Sense No Exonic                                                             |
| 2.15 | ---           | Non-coding transcript identified by NONCODE: Sense No Exonic                                                             |
| 2.15 | Zfp180        | Mus musculus zinc finger protein 180 (Zfp180), transcript variant 1, mRNA.                                               |
| 2.15 | Lyve1         | Mus musculus lymphatic vessel endothelial hyaluronan receptor 1 (Lyve1), mRNA.                                           |
| 2.15 | Gm6741        | predicted gene 6741 [gene_biotype:protein_coding transcript_biotype:protein_coding]                                      |
| 2.15 | ---           | Non-coding transcript identified by NONCODE: Sense No Exonic                                                             |
| 2.15 | ---           | Non-coding transcript identified by NONCODE: Sense No Exonic                                                             |
| 2.15 | Gm23660       | predicted gene, 23660 [gene_biotype:snoRNA transcript_biotype:snoRNA]                                                    |
| 2.14 | Gm12400       | predicted gene 12400 [gene_biotype:unprocessed_pseudogene transcript_biotype:unprocessed_pseudogene]                     |
| 2.14 | Prr15l        | Mus musculus proline rich 15-like (Prr15l), mRNA.                                                                        |
| 2.14 | ---           | Non-coding transcript identified by NONCODE: Linc                                                                        |
| 2.14 | ---           | Non-coding transcript identified by NONCODE: Linc                                                                        |
| 2.14 | Gm24100       | predicted gene, 24100 [gene_biotype:snoRNA transcript_biotype:snoRNA]                                                    |
| 2.14 | ---           | Non-coding transcript identified by NONCODE: Linc                                                                        |
| 2.14 | Gm24686       | predicted gene, 24686 [gene_biotype:snRNA transcript_biotype:snRNA]                                                      |
| 2.14 | Gm13550       | predicted gene 13550 [gene_biotype:processed_pseudogene transcript_biotype:processed_pseudogene]                         |
| 2.14 | ---           | Non-coding transcript identified by NONCODE: Linc                                                                        |
| 2.14 | E330009J07Rik | Mus musculus RIKEN cDNA E330009J07 gene (E330009J07Rik), mRNA.                                                           |
| 2.14 | ---           | Non-coding transcript identified by NONCODE: Linc                                                                        |
| 2.13 | ---           | Non-coding transcript identified by NONCODE: Sense No Exonic                                                             |
| 2.13 | Birc2         | Mus musculus baculoviral IAP repeat-containing 2 (Birc2), transcript variant 1, mRNA.                                    |
| 2.13 | ---           | Mus musculus piRNA piR-114958, complete sequence.                                                                        |
| 2.13 | Btg1          | Mus musculus B cell translocation gene 1, anti-proliferative (Btg1), mRNA.                                               |
| 2.13 | ---           | Non-coding transcript identified by NONCODE: Sense No Exonic                                                             |
| 2.13 | ---           | Non-coding transcript identified by NONCODE: Sense No Exonic                                                             |
| 2.13 | Mir7093       | Mus musculus microRNA 7093 (Mir7093), microRNA.                                                                          |
| 2.13 | ---           | Non-coding transcript identified by NONCODE: Sense No Exonic                                                             |
| 2.13 | Gm2933        | predicted gene 2933 (Gm2933), mRNA.                                                                                      |
| 2.13 | Asb4          | Mus musculus ankyrin repeat and SOCS box-containing 4 (Asb4), mRNA.                                                      |
| 2.13 | ---           | Non-coding transcript identified by Luo, et al.                                                                          |
| 2.12 | ---           | Non-coding transcript identified by NONCODE: Sense No Exonic                                                             |
| 2.12 | ---           | Non-coding transcript identified by NONCODE: Sense No Exonic                                                             |
| 2.12 | ---           | Non-coding transcript identified by NONCODE: Linc                                                                        |
| 2.12 | ---           | Non-coding transcript identified by NONCODE: Antisense                                                                   |
| 2.12 | Gm20179       | PREDICTED: predicted gene, 20179, transcript variant 1 (Gm20179), miscRNA.                                               |
| 2.12 | ---           | Non-coding transcript identified by NONCODE: Antisense                                                                   |
| 2.12 | Gm13363       | predicted gene 13363 [gene_biotype:processed_pseudogene transcript_biotype:processed_pseudogene]                         |
| 2.12 | Zfp317        | Mus musculus zinc finger protein 317 (Zfp317), mRNA.                                                                     |
| 2.12 | Klh38         | Mus musculus kelch-like 38 (Klh38), mRNA.                                                                                |
| 2.11 | Gabarapl1     | Mus musculus gamma-aminobutyric acid (GABA) A receptor-associated protein-like 1 (Gabarapl1), mRNA.                      |
| 2.11 | ---           | Non-coding transcript identified by NONCODE: Linc                                                                        |
| 2.11 | Gm19654       | PREDICTED: predicted gene, 19654 (Gm19654), miscRNA.                                                                     |
| 2.11 | ---           | Non-coding transcript identified by NONCODE: Linc                                                                        |
| 2.11 | Rgs17         | Mus musculus regulator of G-protein signaling 17 (Rgs17), transcript variant 1, mRNA.                                    |
| 2.11 | ---           | Non-coding transcript identified by Luo, et al.                                                                          |
| 2.11 | ---           | Non-coding transcript identified by Luo, et al.                                                                          |
| 2.11 | Amacr         | Mus musculus alpha-methylacyl-CoA racemase (Amacr), mRNA.                                                                |
| 2.10 | Stat2         | Mus musculus signal transducer and activator of transcription 2 (Stat2), mRNA.                                           |
| 2.10 | ---           | Non-coding transcript identified by NONCODE: Linc                                                                        |
| 2.10 | Gm25235       | predicted gene, 25235 [gene_biotype:snRNA transcript_biotype:snRNA]                                                      |
| 2.10 | ---           | Non-coding transcript identified by NONCODE: Sense No Exonic                                                             |
| 2.10 | Map2k3os      | Mus musculus mitogen-activated protein kinase 3, opposite strand (Map2k3os), long non-coding RNA.                        |
| 2.10 | Vmn1r-ps68    | vomer nasal 1 receptor, pseudogene 68 [gene_biotype:unprocessed_pseudogene transcript_biotype:unprocessed_pseudogene]    |
| 2.10 | ---           | Non-coding transcript identified by NONCODE: Sense No Exonic                                                             |
| 2.10 | ---           | Non-coding transcript identified by NONCODE: Sense No Exonic                                                             |
| 2.10 | ---           | Non-coding transcript identified by Luo, et al.                                                                          |
| 2.10 | Gm20426       | predicted gene 20426 [gene_biotype:transcribed_processed_pseudogene transcript_biotype:transcribed_processed_pseudogene] |
| 2.10 | ---           | Non-coding transcript identified by Luo, et al.                                                                          |
| 2.10 | Gm14831       | predicted gene 14831 [gene_biotype:processed_pseudogene transcript_biotype:processed_pseudogene]                         |
| 2.09 | ---           | Non-coding transcript identified by NONCODE: Linc                                                                        |

|      |               |                                                                                                                       |
|------|---------------|-----------------------------------------------------------------------------------------------------------------------|
| 2.09 | ---           | Non-coding transcript identified by NONCODE: Sense No Exonic                                                          |
| 2.09 | ---           | Non-coding transcript identified by NONCODE: Antisense,Sense No Exonic                                                |
| 2.09 | LOC100862039  | PREDICTED: uncharacterized LOC100862039 (LOC100862039), miscRNA.                                                      |
| 2.09 | Gm22391       | predicted gene, 22391 [gene_biotype:snoRNA transcript_biotype:snoRNA]                                                 |
| 2.09 | Gm24137       | predicted gene, 24137 [gene_biotype:snoRNA transcript_biotype:snoRNA]                                                 |
| 2.09 | ---           | Non-coding transcript identified by Luo, et al.                                                                       |
| 2.09 | ---           | Non-coding transcript identified by NONCODE: Sense No Exonic                                                          |
| 2.09 | Ifi44         | Mus musculus interferon-induced protein 44 (Ifi44), mRNA.                                                             |
| 2.09 | ---           | Non-coding transcript identified by NONCODE: Linc                                                                     |
| 2.09 | ---           | Non-coding transcript identified by NONCODE: Sense No Exonic                                                          |
| 2.09 | Gm25555       | predicted gene, 25555 [gene_biotype:rRNA transcript_biotype:rRNA]                                                     |
| 2.08 | Nupr1         | Mus musculus nuclear protein transcription regulator 1 (Nupr1), mRNA.                                                 |
| 2.08 | ---           | Non-coding transcript identified by NONCODE: Linc                                                                     |
| 2.08 | ---           | Mus musculus cDNA, clone:Y0G0105F24, strand:plus, reference:ENSEMBL:Mouse-Transcript-ENST:ENSMUST00000031589, based o |
| 2.08 | ---           | Non-coding transcript identified by NONCODE: Linc                                                                     |
| 2.08 | Gm19474       | PREDICTED: predicted gene, 19474, transcript variant 2 (Gm19474), miscRNA.                                            |
| 2.08 | ---           | Non-coding transcript identified by NONCODE: Sense No Exonic                                                          |
| 2.08 | Gm14519       | predicted gene 14519 [gene_biotype:processed_pseudogene transcript_biotype:processed_pseudogene]                      |
| 2.08 | Gm24256       | predicted gene, 24256 [gene_biotype:snRNA transcript_biotype:snRNA]                                                   |
| 2.08 | Gm26154       | predicted gene, 26154 [gene_biotype:miRNA transcript_biotype:miRNA]                                                   |
| 2.08 | ---           | Mus musculus piRNA piR-20707, complete sequence.                                                                      |
| 2.08 | Gm23297       | predicted gene, 23297 [gene_biotype:snoRNA transcript_biotype:snoRNA]                                                 |
| 2.08 | ---           | Non-coding transcript identified by NONCODE: Sense No Exonic                                                          |
| 2.07 | Zfp35         | Mus musculus zinc finger protein 35 (Zfp35), mRNA.                                                                    |
| 2.07 | ---           | Non-coding transcript identified by Luo, et al.                                                                       |
| 2.07 | Gm22005       | predicted gene, 22005 [gene_biotype:snRNA transcript_biotype:snRNA]                                                   |
| 2.07 | ---           | Mus musculus piRNA piR-118958, complete sequence.                                                                     |
| 2.07 | ---           | Non-coding transcript identified by Luo, et al.                                                                       |
| 2.07 | LOC100861916  | PREDICTED: zinc finger protein 292-like (LOC100861916), mRNA.                                                         |
| 2.07 | ---           | Non-coding transcript identified by NONCODE: Sense No Exonic                                                          |
| 2.07 | Gm22255       | predicted gene, 22255 [gene_biotype:snoRNA transcript_biotype:snoRNA]                                                 |
| 2.07 | ---           | Non-coding transcript identified by Luo, et al.                                                                       |
| 2.06 | ---           | Non-coding transcript identified by NONCODE: Sense No Exonic                                                          |
| 2.06 | ---           | Non-coding transcript identified by NONCODE: Sense No Exonic                                                          |
| 2.06 | ---           | Non-coding transcript identified by NONCODE: Linc                                                                     |
| 2.06 | ---           | Non-coding transcript identified by NONCODE: Sense No Exonic                                                          |
| 2.06 | ---           | Non-coding transcript identified by NONCODE: Sense No Exonic                                                          |
| 2.06 | ---           | Non-coding transcript identified by NONCODE: Linc                                                                     |
| 2.06 | ---           | Non-coding transcript identified by NONCODE: Linc                                                                     |
| 2.06 | 9230110C19Rik | Mus musculus RIKEN cDNA 9230110C19 gene (9230110C19Rik), mRNA.                                                        |
| 2.06 | Npas2         | Mus musculus neuronal PAS domain protein 2 (Npas2), mRNA.                                                             |
| 2.06 | B3galnt1      | Mus musculus UDP-GalNAc:betaGlcNAc beta 1,3-galactosaminyltransferase, polypeptide 1 (B3galnt1), mRNA.                |
| 2.06 | Gm24532       | predicted gene, 24532                                                                                                 |
| 2.05 | Xlr3b         | Mus musculus X-linked lymphocyte-regulated 3B (Xlr3b), mRNA.                                                          |
| 2.05 | Gm25108       | predicted gene, 25108 [gene_biotype:snoRNA transcript_biotype:snoRNA]                                                 |
| 2.05 | ---           | Non-coding transcript identified by NONCODE: Antisense                                                                |
| 2.05 | ---           | Non-coding transcript identified by NONCODE: Antisense                                                                |
| 2.05 | ---           | Non-coding transcript identified by NONCODE: Sense No Exonic                                                          |
| 2.05 | ---           | Mus musculus non-coding RNA, oocyte_clustered_small_RNA13617, complete sequence.                                      |
| 2.05 | ---           | Non-coding transcript identified by NONCODE: Sense No Exonic                                                          |
| 2.05 | ---           | Non-coding transcript identified by NONCODE: Linc                                                                     |
| 2.05 | Gm13502       | predicted gene 13502                                                                                                  |
| 2.04 | ---           | Non-coding transcript identified by NONCODE: Sense No Exonic                                                          |
| 2.04 | Gm23926       | predicted gene, 23926 [gene_biotype:snRNA transcript_biotype:snRNA]                                                   |
| 2.04 | Mir1251       | Mus musculus microRNA 1251 (Mir1251), microRNA.                                                                       |
| 2.04 | BC052040      | Mus musculus cDNA sequence BC052040 (BC052040), transcript variant 1, mRNA.                                           |
| 2.04 | ---           | Non-coding transcript identified by NONCODE: Sense No Exonic                                                          |
| 2.04 | ---           | Non-coding transcript identified by NONCODE: Sense No Exonic                                                          |
| 2.04 | Trmt5         | Mus musculus TRM5 tRNA methyltransferase 5 (Trmt5), mRNA.                                                             |
| 2.04 | ---           | Non-coding transcript identified by NONCODE: Sense No Exonic                                                          |
| 2.04 | ---           | Non-coding transcript identified by NONCODE: Sense No Exonic                                                          |
| 2.04 | LOC100862243  | PREDICTED: uncharacterized LOC100862243 (LOC100862243), miscRNA.                                                      |
| 2.04 | ---           | Non-coding transcript identified by NONCODE: Sense No Exonic                                                          |
| 2.04 | ---           | Non-coding transcript identified by Luo, et al.                                                                       |
| 2.04 | ---           | Non-coding transcript identified by Luo, et al.                                                                       |
| 2.04 | Cish          | Mus musculus cytokine inducible SH2-containing protein (Cish), mRNA.                                                  |
| 2.04 | ---           | Non-coding transcript identified by NONCODE: Sense No Exonic                                                          |
| 2.04 | 1700006F04Rik | Mus musculus RIKEN cDNA 1700006F04 gene (1700006F04Rik), long non-coding RNA.                                         |
| 2.04 | Tspyl5        | Mus musculus testis-specific protein, Y-encoded-like 5 (Tspyl5), mRNA.                                                |
| 2.04 | Gm8705        | predicted gene 8705 [gene_biotype:lincRNA transcript_biotype:lincRNA]                                                 |
| 2.03 | ---           | Non-coding transcript identified by NONCODE: Sense No Exonic                                                          |
| 2.03 | Necab1        | Mus musculus N-terminal EF-hand calcium binding protein 1 (Necab1), mRNA.                                             |
| 2.03 | ---           | Non-coding transcript identified by NONCODE: Antisense                                                                |
| 2.03 | ---           | Non-coding transcript identified by NONCODE: Linc                                                                     |
| 2.03 | ---           | Non-coding transcript identified by Luo, et al.                                                                       |
| 2.03 | Gm20412       | predicted gene 20412 [gene_biotype:processed_transcript transcript_biotype:processed_transcript]                      |



|       |               |                                                                                                                   |
|-------|---------------|-------------------------------------------------------------------------------------------------------------------|
| 2.03  | ---           | Non-coding transcript identified by NONCODE: Sense No Exonic                                                      |
| 2.03  | Noct          | Mus musculus nocturnin (Noct), mRNA.                                                                              |
| 2.03  | Gm25175       | predicted gene, 25175 [gene_biotype:snoRNA transcript_biotype:snoRNA]                                             |
| 2.03  | ---           | Non-coding transcript identified by NONCODE: Sense No Exonic                                                      |
| 2.03  | ---           | Mus musculus RNA for germline small RNA gsRNA265, complete sequence.                                              |
| 2.03  | ---           | Non-coding transcript identified by NONCODE: Sense No Exonic                                                      |
| 2.03  | Gpr62         | Mus musculus G protein-coupled receptor 62 (Gpr62), mRNA.                                                         |
| 2.02  | Mir3080       | microRNA 3080                                                                                                     |
| 2.02  | Mir3080       | Mus musculus microRNA 3080 (Mir3080), microRNA.                                                                   |
| 2.02  | Gm24657       | predicted gene, 24657 [gene_biotype:snoRNA transcript_biotype:snoRNA]                                             |
| 2.02  | Gm23922       | predicted gene, 23922 [gene_biotype:snoRNA transcript_biotype:snoRNA]                                             |
| 2.02  | Gm22996       | predicted gene, 22996 [gene_biotype:snoRNA transcript_biotype:snoRNA]                                             |
| 2.02  | Birc3         | Mus musculus baculoviral IAP repeat-containing 3 (Birc3), mRNA.                                                   |
| 2.02  | Plek          | Mus musculus pleckstrin (Plek), mRNA.                                                                             |
| 2.02  | Gm27209       | predicted gene 27209 [gene_biotype:antisense transcript_biotype:antisense]                                        |
| 2.02  | ---           | Non-coding transcript identified by NONCODE: Linc                                                                 |
| 2.02  | ---           | Non-coding transcript identified by NONCODE: Linc                                                                 |
| 2.02  | ---           | Non-coding transcript identified by Luo, et al.                                                                   |
| 2.02  | Mtmr10        | Mus musculus myotubularin related protein 10 (Mtmr10), mRNA.                                                      |
| 2.02  | ---           | Non-coding transcript identified by NONCODE: Sense No Exonic                                                      |
| 2.02  | 9630013D21Rik | RIKEN cDNA 9630013D21 gene                                                                                        |
| 2.02  | Cnn3          | Mus musculus calponin 3, acidic (Cnn3), mRNA.                                                                     |
| 2.02  | ---           | Non-coding transcript identified by NONCODE: Linc                                                                 |
| 2.02  | ---           | Non-coding transcript identified by NONCODE: Sense No Exonic                                                      |
| 2.02  | ---           | Non-coding transcript identified by NONCODE: Sense No Exonic                                                      |
| 2.02  | Olfir556      | Mus musculus olfactory receptor 556 (Olfir556), mRNA.                                                             |
| 2.01  | ---           | Non-coding transcript identified by NONCODE: Sense No Exonic                                                      |
| 2.01  | Ikzf4         | Mus musculus IKAROS family zinc finger 4 (Ikzf4), mRNA.                                                           |
| 2.01  | ---           | Non-coding transcript identified by NONCODE: Sense No Exonic                                                      |
| 2.01  | ---           | Non-coding transcript identified by NONCODE: Sense No Exonic                                                      |
| 2.01  | ---           | Non-coding transcript identified by NONCODE: Sense No Exonic                                                      |
| 2.01  | Gm2897        | predicted gene 2897 (Gm2897), transcript variant 1, mRNA.                                                         |
| 2.01  | ---           | Non-coding transcript identified by NONCODE: Sense No Exonic                                                      |
| 2.01  | ---           | Mus musculus cDNA, clone:Y2G0121G16, strand:unspecified.                                                          |
| 2.01  | Galnt18       | Mus musculus UDP-N-acetyl-alpha-D-galactosamine:polypeptide N-acetylgalactosaminyltransferase 18 (Galnt18), mRNA. |
| 2.01  | ---           | Mus musculus non-coding RNA, oocyte_clustered_small_RNA5134, complete sequence.                                   |
| 2.01  | ---           | Mus musculus non-coding RNA, oocyte_clustered_small_RNA5129, complete sequence.                                   |
| 2.01  | ---           | Mus musculus non-coding RNA, oocyte_clustered_small_RNA4554, complete sequence.                                   |
| 2.01  | Gm11743       | predicted gene 11743 [gene_biotype:processed_pseudogene transcript_biotype:processed_pseudogene]                  |
| 2.01  | Snx29         | Mus musculus sorting nexin 29 (Snx29), transcript variant 2, mRNA.                                                |
| 2.01  | ---           | Non-coding transcript identified by NONCODE: Sense No Exonic                                                      |
| 2.00  | Rsad2         | Mus musculus radical S-adenosyl methionine domain containing 2 (Rsad2), mRNA.                                     |
| 2.00  | ---           | Non-coding transcript identified by NONCODE: Linc                                                                 |
| 2.00  | ---           | Mus musculus non-coding RNA, oocyte_clustered_small_RNA1961, complete sequence.                                   |
| 2.00  | Parp14        | Mus musculus poly (ADP-ribose) polymerase family, member 14 (Parp14), mRNA.                                       |
| 2.00  | ---           | Non-coding transcript identified by Luo, et al.                                                                   |
| 2.00  | Gm26413       | predicted gene, 26413                                                                                             |
| 2.00  | ---           | Non-coding transcript identified by Luo, et al.                                                                   |
| 2.00  | Nanp          | Mus musculus N-acetylneuraminic acid phosphatase (Nanp), mRNA.                                                    |
| 2.00  | Pim2          | Mus musculus proviral integration site 2 (Pim2), mRNA.                                                            |
| 2.00  | Gabra4        | Mus musculus gamma-aminobutyric acid (GABA) A receptor, subunit alpha 4 (Gabra4), mRNA.                           |
| 2.00  | Gm27168       | predicted gene 27168 [gene_biotype:lincRNA transcript_biotype:lincRNA]                                            |
| 2.00  | ---           | Non-coding transcript identified by NONCODE: Sense No Exonic                                                      |
| 2.00  | 4930488L21Rik | Mus musculus RIKEN cDNA 4930488L21 gene (4930488L21Rik), long non-coding RNA.                                     |
| 2.00  | ---           | Non-coding transcript identified by NONCODE: Linc                                                                 |
| 2.00  | ---           | Non-coding transcript identified by Luo, et al.                                                                   |
| 2.00  | ---           | Non-coding transcript identified by NONCODE: Sense No Exonic                                                      |
| 2.00  | Gm12645       | predicted gene 12645 [gene_biotype:processed_pseudogene transcript_biotype:processed_pseudogene]                  |
| 2.00  | Mir7661       | Mus musculus microRNA 7661 (Mir7661), microRNA.                                                                   |
| -2.00 | ---           | Non-coding transcript identified by Luo, et al.                                                                   |
| -2.00 | ---           | Non-coding transcript identified by NONCODE: Sense No Exonic                                                      |
| -2.00 | ---           | Mus musculus RNA for germline small RNA gsRNA168, complete sequence.                                              |
| -2.00 | ---           | Non-coding transcript identified by NONCODE: Sense No Exonic                                                      |
| -2.00 | ---           | Non-coding transcript identified by NONCODE: Linc                                                                 |
| -2.00 | ---           | Non-coding transcript identified by NONCODE: Sense No Exonic                                                      |
| -2.00 | ---           | Non-coding transcript identified by NONCODE: Sense No Exonic                                                      |
| -2.00 | ---           | Mus musculus non-coding RNA, oocyte_clustered_small_RNA1757, complete sequence.                                   |
| -2.00 | ---           | Non-coding transcript identified by NONCODE: Sense No Exonic                                                      |
| -2.00 | ---           | Non-coding transcript identified by NONCODE: Sense No Exonic                                                      |
| -2.00 | ---           | Non-coding transcript identified by NONCODE: Sense No Exonic                                                      |
| -2.00 | ---           | Non-coding transcript identified by NONCODE: Sense No Exonic                                                      |
| -2.00 | ---           | Non-coding transcript identified by NONCODE: Sense No Exonic                                                      |
| -2.00 | ---           | Non-coding transcript identified by NONCODE: Sense No Exonic                                                      |
| -2.00 | ---           | Non-coding transcript identified by NONCODE: Sense No Exonic                                                      |
| -2.00 | Prkcq         | Mus musculus protein kinase C, theta (Prkcq), mRNA.                                                               |
| -2.00 | ---           | Non-coding transcript identified by NONCODE: Sense No Exonic                                                      |
| -2.00 | ---           | Non-coding transcript identified by NONCODE: Linc                                                                 |

|       |         |                                                                                                                         |
|-------|---------|-------------------------------------------------------------------------------------------------------------------------|
| -2.00 | ---     | Non-coding transcript identified by NONCODE: Sense No Exonic                                                            |
| -2.00 | ---     | Non-coding transcript identified by NONCODE: Sense No Exonic                                                            |
| -2.00 | ---     | Non-coding transcript identified by NONCODE: Sense No Exonic                                                            |
| -2.00 | ---     | Non-coding transcript identified by NONCODE: Antisense,Sense No Exonic                                                  |
| -2.00 | ---     | Non-coding transcript identified by NONCODE: Sense No Exonic                                                            |
| -2.00 | Gm23354 | predicted gene, 23354 [gene_biotype:snRNA transcript_biotype:snRNA]                                                     |
| -2.00 | ---     | Non-coding transcript identified by NONCODE: Linc                                                                       |
| -2.01 | ---     | Non-coding transcript identified by NONCODE: Sense No Exonic                                                            |
| -2.01 | ---     | Non-coding transcript identified by NONCODE: Sense No Exonic                                                            |
| -2.01 | Gm26138 | predicted gene, 26138 [gene_biotype:snRNA transcript_biotype:snRNA]                                                     |
| -2.01 | ---     | Non-coding transcript identified by NONCODE: Sense No Exonic                                                            |
| -2.01 | Mir673  | Mus musculus microRNA 673 (Mir673), microRNA.                                                                           |
| -2.01 | ---     | Non-coding transcript identified by NONCODE: Sense No Exonic                                                            |
| -2.01 | ---     | Non-coding transcript identified by NONCODE: Sense No Exonic                                                            |
| -2.01 | ---     | Non-coding transcript identified by NONCODE: Linc                                                                       |
| -2.01 | Olf1505 | Mus musculus olfactory receptor 1505 (Olf1505), mRNA.                                                                   |
| -2.01 | ---     | Non-coding transcript identified by NONCODE: Sense No Exonic                                                            |
| -2.01 | ---     | Non-coding transcript identified by NONCODE: Antisense                                                                  |
| -2.01 | ---     | Non-coding transcript identified by NONCODE: Sense No Exonic                                                            |
| -2.01 | Mir7663 | Mus musculus microRNA 7663 (Mir7663), microRNA.                                                                         |
| -2.01 | Cbr2    | Mus musculus carbonyl reductase 2 (Cbr2), mRNA.                                                                         |
| -2.01 | ---     | Non-coding transcript identified by NONCODE: Sense No Exonic                                                            |
| -2.01 | Mir5125 | microRNA 5125                                                                                                           |
| -2.01 | ---     | Non-coding transcript identified by NONCODE: Sense No Exonic                                                            |
| -2.01 | Dear1   | Mus musculus dual endothelin 1/angiotensin II receptor 1 (Dear1), mRNA.                                                 |
| -2.01 | ---     | Non-coding transcript identified by NONCODE: Sense No Exonic                                                            |
| -2.01 | ---     | Non-coding transcript identified by Luo, et al.                                                                         |
| -2.01 | ---     | ensembl:novel scaffold:GRCm38:GL456210.1:123792:124928:1 gene:ENSMUSG00000079192 gene_biotype:protein_coding transcript |
| -2.01 | ---     | Non-coding transcript identified by NONCODE: Sense No Exonic                                                            |
| -2.01 | ---     | Non-coding transcript identified by NONCODE: Sense No Exonic                                                            |
| -2.02 | C7      | Mus musculus complement component 7 (C7), mRNA.                                                                         |
| -2.02 | ---     | Non-coding transcript identified by NONCODE: Linc                                                                       |
| -2.02 | ---     | Non-coding transcript identified by NONCODE: Sense No Exonic                                                            |
| -2.02 | ---     | Non-coding transcript identified by NONCODE: Sense No Exonic                                                            |
| -2.02 | ---     | Mus musculus non-coding RNA, oocyte_piRNA1525, complete sequence.                                                       |
| -2.02 | ---     | Mus musculus non-coding RNA, oocyte_piRNA469, complete sequence.                                                        |
| -2.02 | ---     | Mus musculus non-coding RNA, oocyte_piRNA1525, complete sequence.                                                       |
| -2.02 | ---     | Mus musculus non-coding RNA, oocyte_piRNA1525, complete sequence.                                                       |
| -2.02 | ---     | Mus musculus non-coding RNA, oocyte_piRNA1525, complete sequence.                                                       |
| -2.02 | ---     | Mus musculus non-coding RNA, oocyte_piRNA469, complete sequence.                                                        |
| -2.02 | ---     | Non-coding transcript identified by NONCODE: Sense No Exonic                                                            |
| -2.02 | ---     | Non-coding transcript identified by NONCODE: Sense No Exonic                                                            |
| -2.02 | Fcmr    | Mus musculus Fc fragment of IgM receptor (Fcmr), mRNA.                                                                  |
| -2.02 | ---     | Non-coding transcript identified by NONCODE: Sense No Exonic                                                            |
| -2.02 | ---     | Non-coding transcript identified by NONCODE: Sense No Exonic                                                            |
| -2.02 | ---     | Non-coding transcript identified by NONCODE: Sense No Exonic                                                            |
| -2.02 | ---     | Non-coding transcript identified by NONCODE: Sense No Exonic                                                            |
| -2.02 | ---     | Non-coding transcript identified by NONCODE: Sense No Exonic                                                            |
| -2.02 | ---     | Non-coding transcript identified by NONCODE: Sense No Exonic                                                            |
| -2.02 | ---     | Non-coding transcript identified by NONCODE: Sense No Exonic                                                            |
| -2.02 | Gm26285 | predicted gene, 26285 [gene_biotype:snRNA transcript_biotype:snRNA]                                                     |
| -2.02 | ---     | Mus musculus non-coding RNA, oocyte_clustered_small_RNA5042, complete sequence.                                         |
| -2.02 | ---     | Mus musculus non-coding RNA, oocyte_clustered_small_RNA5035, complete sequence.                                         |
| -2.02 | ---     | Non-coding transcript identified by NONCODE: Sense No Exonic                                                            |
| -2.02 | Mmp2    | Mus musculus matrix metalloproteinase 2 (Mmp2), mRNA.                                                                   |
| -2.02 | Gm25348 | predicted gene, 25348 [gene_biotype:rRNA transcript_biotype:rRNA]                                                       |
| -2.02 | ---     | Non-coding transcript identified by NONCODE: Sense No Exonic                                                            |
| -2.02 | ---     | Non-coding transcript identified by NONCODE: Sense No Exonic                                                            |
| -2.02 | Snora30 | Mus musculus small nucleolar RNA, H/ACA box 30 (Snora30), small nucleolar RNA.                                          |
| -2.02 | ---     | Non-coding transcript identified by Luo, et al.                                                                         |
| -2.02 | ---     | Non-coding transcript identified by NONCODE: Sense No Exonic                                                            |
| -2.02 | ---     | Non-coding transcript identified by NONCODE: Sense No Exonic                                                            |
| -2.02 | Trbd1   | T cell receptor beta, D region 1                                                                                        |
| -2.02 | ---     | Non-coding transcript identified by NONCODE: Linc                                                                       |
| -2.02 | ---     | Non-coding transcript identified by NONCODE: Linc                                                                       |
| -2.03 | Gm20705 | predicted gene 20705 [gene_biotype:sense_intronic transcript_biotype:sense_intronic]                                    |
| -2.03 | ---     | Non-coding transcript identified by NONCODE: Sense No Exonic                                                            |
| -2.03 | ---     | Non-coding transcript identified by Luo, et al.                                                                         |
| -2.03 | Best3   | Mus musculus bestrophin 3 (Best3), mRNA.                                                                                |
| -2.03 | ---     | Non-coding transcript identified by NONCODE: Linc                                                                       |
| -2.03 | ---     | Non-coding transcript identified by NONCODE: Sense No Exonic                                                            |
| -2.03 | Gimap4  | Mus musculus GTPase, IMAP family member 4 (Gimap4), transcript variant 3, mRNA.                                         |
| -2.03 | ---     | Non-coding transcript identified by Luo, et al.                                                                         |
| -2.03 | ---     | Non-coding transcript identified by NONCODE: Sense No Exonic                                                            |

|       |           |                                                                                                      |
|-------|-----------|------------------------------------------------------------------------------------------------------|
| -2.03 | ---       | Non-coding transcript identified by NONCODE: Sense No Exonic                                         |
| -2.03 | ---       | Non-coding transcript identified by NONCODE: Linc                                                    |
| -2.03 | ---       | Non-coding transcript identified by NONCODE: Linc                                                    |
| -2.03 | ---       | Non-coding transcript identified by NONCODE: Sense No Exonic                                         |
| -2.04 | ---       | Non-coding transcript identified by NONCODE: Sense No Exonic                                         |
| -2.04 | ---       | Non-coding transcript identified by NONCODE: Linc                                                    |
| -2.04 | Stk17b    | Mus musculus serine/threonine kinase 17b (apoptosis-inducing) (Stk17b), mRNA.                        |
| -2.04 | Gm13805   | predicted gene 13805                                                                                 |
| -2.04 | ---       | Non-coding transcript identified by NONCODE: Sense No Exonic                                         |
| -2.04 | ---       | Non-coding transcript identified by NONCODE: Sense No Exonic                                         |
| -2.04 | ---       | Non-coding transcript identified by Luo, et al.                                                      |
| -2.04 | ---       | Non-coding transcript identified by NONCODE: Sense No Exonic                                         |
| -2.04 | ---       | Non-coding transcript identified by Luo, et al.                                                      |
| -2.04 | Gm12893   | predicted gene 12893 [gene_biotype:unprocessed_pseudogene transcript_biotype:unprocessed_pseudogene] |
| -2.04 | ---       | Non-coding transcript identified by NONCODE: Sense No Exonic                                         |
| -2.04 | ---       | Non-coding transcript identified by NONCODE: Sense No Exonic                                         |
| -2.04 | ---       | Non-coding transcript identified by NONCODE: Sense No Exonic                                         |
| -2.04 | ---       | Mus musculus non-coding RNA, oocyte_piRNA2705, complete sequence.                                    |
| -2.04 | ---       | Mus musculus non-coding RNA, oocyte_piRNA2705, complete sequence.                                    |
| -2.04 | ---       | Mus musculus non-coding RNA, oocyte_clustered_small_RNA943, complete sequence.                       |
| -2.04 | ---       | Non-coding transcript identified by NONCODE: Sense No Exonic                                         |
| -2.04 | ---       | Non-coding transcript identified by NONCODE: Sense No Exonic                                         |
| -2.04 | ---       | Non-coding transcript identified by NONCODE: Sense No Exonic                                         |
| -2.04 | ---       | Non-coding transcript identified by NONCODE: Sense No Exonic                                         |
| -2.04 | ---       | Mus musculus non-coding RNA, oocyte_clustered_small_RNA8178, complete sequence.                      |
| -2.04 | ---       | Non-coding transcript identified by NONCODE: Sense No Exonic                                         |
| -2.04 | ---       | Non-coding transcript identified by NONCODE: Linc                                                    |
| -2.04 | ---       | Non-coding transcript identified by NONCODE: Sense No Exonic                                         |
| -2.04 | ---       | Non-coding transcript identified by NONCODE: Sense No Exonic                                         |
| -2.04 | ---       | Non-coding transcript identified by NONCODE: Sense No Exonic                                         |
| -2.04 | ---       | Non-coding transcript identified by NONCODE: Sense No Exonic                                         |
| -2.04 | Plxnc1    | Mus musculus plexin C1 (Plxnc1), mRNA.                                                               |
| -2.04 | ---       | Non-coding transcript identified by NONCODE: Linc                                                    |
| -2.04 | Gm22716   | predicted gene, 22716 [gene_biotype:snRNA transcript_biotype:snRNA]                                  |
| -2.05 | ---       | Non-coding transcript identified by NONCODE: Antisense                                               |
| -2.05 | ---       | Non-coding transcript identified by NONCODE: Sense No Exonic                                         |
| -2.05 | ---       | Non-coding transcript identified by NONCODE: Linc                                                    |
| -2.05 | ---       | Non-coding transcript identified by Luo, et al.                                                      |
| -2.05 | ---       | Non-coding transcript identified by NONCODE: Antisense                                               |
| -2.05 | ---       | Non-coding transcript identified by NONCODE: Sense No Exonic                                         |
| -2.05 | Fbxo42    | Mus musculus F-box protein 42 (Fbxo42), mRNA.                                                        |
| -2.05 | ---       | Non-coding transcript identified by NONCODE: Antisense                                               |
| -2.05 | ---       | Non-coding transcript identified by NONCODE: Sense No Exonic                                         |
| -2.05 | Trav9-1   | T cell receptor alpha variable 9-1                                                                   |
| -2.05 | ---       | Non-coding transcript identified by NONCODE: Sense No Exonic                                         |
| -2.05 | ---       | Non-coding transcript identified by NONCODE: Sense No Exonic                                         |
| -2.05 | ---       | Non-coding transcript identified by NONCODE: Sense No Exonic                                         |
| -2.05 | Snord14a  | small nucleolar RNA, C/D box 14A                                                                     |
| -2.05 | Mmp7      | Mus musculus matrix metalloproteinase 7 (Mmp7), mRNA.                                                |
| -2.05 | ---       | Non-coding transcript identified by NONCODE: Sense No Exonic                                         |
| -2.05 | ---       | Non-coding transcript identified by Luo, et al.                                                      |
| -2.05 | ---       | Mus musculus non-coding RNA, oocyte_clustered_small_RNA5231, complete sequence.                      |
| -2.05 | ---       | Mus musculus non-coding RNA, oocyte_piRNA3636, complete sequence.                                    |
| -2.05 | ---       | Non-coding transcript identified by NONCODE: Sense No Exonic                                         |
| -2.05 | Mboat1    | Mus musculus membrane bound O-acyltransferase domain containing 1 (Mboat1), mRNA.                    |
| -2.05 | ---       | Non-coding transcript identified by NONCODE: Sense No Exonic                                         |
| -2.05 | ---       | Non-coding transcript identified by NONCODE: Linc                                                    |
| -2.05 | ---       | Non-coding transcript identified by NONCODE: Sense No Exonic                                         |
| -2.06 | Gm26684   | predicted gene, 26684 [gene_biotype:lincRNA transcript_biotype:lincRNA]                              |
| -2.06 | ---       | Non-coding transcript identified by NONCODE: Antisense                                               |
| -2.06 | Tcf7      | Mus musculus transcription factor 7, T cell specific (Tcf7), transcript variant 2, mRNA.             |
| -2.06 | ---       | Non-coding transcript identified by NONCODE: Sense No Exonic                                         |
| -2.06 | ---       | Non-coding transcript identified by NONCODE: Sense No Exonic                                         |
| -2.06 | Olf594    | Mus musculus olfactory receptor 594 (Olf594), mRNA.                                                  |
| -2.06 | Gm21182   | predicted gene, 21182 [gene_biotype:processed_pseudogene transcript_biotype:processed_pseudogene]    |
| -2.06 | Gm25410   | predicted gene, 25410 [gene_biotype:snoRNA transcript_biotype:snoRNA]                                |
| -2.06 | ---       | Non-coding transcript identified by NONCODE: Sense No Exonic                                         |
| -2.06 | ---       | Non-coding transcript identified by NONCODE: Sense No Exonic                                         |
| -2.06 | ---       | Non-coding transcript identified by NONCODE: Antisense                                               |
| -2.06 | ---       | Non-coding transcript identified by NONCODE: Linc                                                    |
| -2.06 | ---       | Non-coding transcript identified by NONCODE: Sense No Exonic                                         |
| -2.06 | ---       | Non-coding transcript identified by NONCODE: Sense No Exonic                                         |
| -2.06 | ---       | Non-coding transcript identified by NONCODE: Antisense                                               |
| -2.06 | ---       | Non-coding transcript identified by NONCODE: Sense No Exonic                                         |
| -2.06 | Mir297a-4 | microRNA 297a-4 [gene_biotype:miRNA transcript_biotype:miRNA]                                        |
| -2.06 | ---       | Non-coding transcript identified by NONCODE: Sense No Exonic                                         |
| -2.06 | ---       | Non-coding transcript identified by NONCODE: Sense No Exonic                                         |

|       |          |                                                                                                         |
|-------|----------|---------------------------------------------------------------------------------------------------------|
| -2.06 | Gm3364   | PREDICTED: predicted gene 3364 (Gm3364), miscRNA.                                                       |
| -2.06 | Polg2    | Mus musculus polymerase (DNA directed), gamma 2, accessory subunit (Polg2), transcript variant 1, mRNA. |
| -2.06 | ---      | Non-coding transcript identified by NONCODE: Sense No Exonic                                            |
| -2.06 | Ms4a4b   | Mus musculus membrane-spanning 4-domains, subfamily A, member 4B (Ms4a4b), mRNA.                        |
| -2.07 | Gm24582  | predicted gene, 24582 [gene_biotype:snRNA transcript_biotype:snRNA]                                     |
| -2.07 | ---      | Non-coding transcript identified by NONCODE: Sense No Exonic                                            |
| -2.07 | ---      | Non-coding transcript identified by NONCODE: Sense No Exonic                                            |
| -2.07 | Gm25033  | predicted gene, 25033 [gene_biotype:miRNA transcript_biotype:miRNA]                                     |
| -2.07 | ---      | Non-coding transcript identified by NONCODE: Sense No Exonic                                            |
| -2.07 | ---      | Non-coding transcript identified by NONCODE: Sense No Exonic                                            |
| -2.07 | Igkv6-25 | immunoglobulin kappa chain variable 6-25                                                                |
| -2.07 | ---      | Non-coding transcript identified by NONCODE: Sense No Exonic                                            |
| -2.07 | ---      | Non-coding transcript identified by NONCODE: Sense No Exonic                                            |
| -2.07 | Gabra3   | Mus musculus gamma-aminobutyric acid (GABA) A receptor, subunit alpha 3 (Gabra3), mRNA.                 |
| -2.07 | ---      | Non-coding transcript identified by NONCODE: Antisense                                                  |
| -2.07 | Igkv8-21 | immunoglobulin kappa variable 8-21                                                                      |
| -2.07 | ---      | Non-coding transcript identified by NONCODE: Sense No Exonic                                            |
| -2.07 | ---      | Non-coding transcript identified by NONCODE: Linc                                                       |
| -2.07 | ---      | Non-coding transcript identified by NONCODE: Linc                                                       |
| -2.07 | ---      | Non-coding transcript identified by NONCODE: Sense No Exonic                                            |
| -2.07 | ---      | Non-coding transcript identified by NONCODE: Antisense                                                  |
| -2.07 | ---      | Non-coding transcript identified by NONCODE: Sense No Exonic                                            |
| -2.07 | Fn1      | Mus musculus fibronectin 1 (Fn1), transcript variant 2, mRNA.                                           |
| -2.07 | Prelp    | Mus musculus proline arginine-rich end leucine-rich repeat (Prelp), mRNA.                               |
| -2.07 | Gm27379  | predicted gene, 27379 [gene_biotype:miRNA transcript_biotype:miRNA]                                     |
| -2.08 | ---      | Non-coding transcript identified by NONCODE: Linc                                                       |
| -2.08 | ---      | Non-coding transcript identified by NONCODE: Linc                                                       |
| -2.08 | ---      | Non-coding transcript identified by NONCODE: Sense No Exonic                                            |
| -2.08 | ---      | Non-coding transcript identified by NONCODE: Sense No Exonic                                            |
| -2.08 | ---      | Non-coding transcript identified by NONCODE: Sense No Exonic                                            |
| -2.08 | ---      | Non-coding transcript identified by NONCODE: Sense No Exonic                                            |
| -2.08 | ---      | Mus musculus non-coding RNA, oocyte_clustered_small_RNA8661, complete sequence.                         |
| -2.08 | ---      | Non-coding transcript identified by NONCODE: Antisense                                                  |
| -2.08 | ---      | Non-coding transcript identified by Luo, et al.                                                         |
| -2.08 | ---      | Non-coding transcript identified by NONCODE: Sense No Exonic                                            |
| -2.08 | ---      | Non-coding transcript identified by NONCODE: Sense No Exonic                                            |
| -2.08 | ---      | Non-coding transcript identified by NONCODE: Sense No Exonic                                            |
| -2.08 | ---      | Non-coding transcript identified by NONCODE: Sense No Exonic                                            |
| -2.08 | ---      | Non-coding transcript identified by NONCODE: Sense No Exonic                                            |
| -2.08 | ---      | Non-coding transcript identified by NONCODE: Sense No Exonic                                            |
| -2.08 | ---      | Non-coding transcript identified by NONCODE: Sense No Exonic                                            |
| -2.08 | Sass6    | Mus musculus spindle assembly 6 homolog (C. elegans) (Sass6), transcript variant 3, mRNA.               |
| -2.08 | Snord69  | Mus musculus small nucleolar RNA, C/D box 69 (Snord69), small nucleolar RNA.                            |
| -2.08 | ---      | Non-coding transcript identified by NONCODE: Sense No Exonic                                            |
| -2.08 | ---      | Non-coding transcript identified by NONCODE: Sense No Exonic                                            |
| -2.08 | ---      | Mus musculus non-coding RNA, oocyte_clustered_small_RNA7898, complete sequence.                         |
| -2.08 | ---      | Non-coding transcript identified by NONCODE: Sense No Exonic                                            |
| -2.08 | Gm23346  | predicted gene, 23346 [gene_biotype:snoRNA transcript_biotype:snoRNA]                                   |
| -2.09 | ---      | Non-coding transcript identified by NONCODE: Sense No Exonic                                            |
| -2.09 | ---      | Non-coding transcript identified by NONCODE: Antisense,Sense No Exonic                                  |
| -2.09 | ---      | Non-coding transcript identified by NONCODE: Sense No Exonic                                            |
| -2.09 | Gm25117  | predicted gene, 25117 [gene_biotype:snoRNA transcript_biotype:snoRNA]                                   |
| -2.09 | Gm11522  | predicted gene 11522 [gene_biotype:processed_pseudogene transcript_biotype:processed_pseudogene]        |
| -2.09 | ---      | Mus musculus non-coding RNA, oocyte_clustered_small_RNA643, complete sequence.                          |
| -2.09 | ---      | Non-coding transcript identified by NONCODE: Sense No Exonic                                            |
| -2.09 | ---      | Non-coding transcript identified by NONCODE: Sense No Exonic                                            |
| -2.09 | ---      | Non-coding transcript identified by NONCODE: Sense No Exonic                                            |
| -2.09 | ---      | Non-coding transcript identified by NONCODE: Sense No Exonic                                            |
| -2.09 | ---      | Non-coding transcript identified by NONCODE: Sense No Exonic                                            |
| -2.09 | Gm12409  | Mus musculus predicted gene 12409 (Gm12409), long non-coding RNA.                                       |
| -2.09 | ---      | Non-coding transcript identified by NONCODE: Antisense                                                  |
| -2.09 | ---      | Non-coding transcript identified by NONCODE: Sense No Exonic                                            |
| -2.09 | ---      | Non-coding transcript identified by NONCODE: Linc                                                       |
| -2.09 | ---      | Non-coding transcript identified by NONCODE: Sense No Exonic                                            |
| -2.09 | ---      | Non-coding transcript identified by NONCODE: Sense No Exonic                                            |
| -2.09 | ---      | Non-coding transcript identified by NONCODE: Sense No Exonic                                            |
| -2.09 | ---      | Non-coding transcript identified by NONCODE: Sense No Exonic                                            |
| -2.09 | ---      | Non-coding transcript identified by NONCODE: Sense No Exonic                                            |
| -2.09 | ---      | Non-coding transcript identified by NONCODE: Sense No Exonic                                            |
| -2.09 | ---      | Non-coding transcript identified by NONCODE: Sense No Exonic                                            |
| -2.09 | Olfir541 | Mus musculus olfactory receptor 541 (Olfir541), mRNA.                                                   |
| -2.10 | Cd8a     | Mus musculus CD8 antigen, alpha chain (Cd8a), transcript variant 1, mRNA.                               |
| -2.10 | ---      | Non-coding transcript identified by NONCODE: Sense No Exonic                                            |
| -2.10 | Tmem144  | Mus musculus transmembrane protein 144 (Tmem144), mRNA.                                                 |
| -2.10 | ---      | Non-coding transcript identified by NONCODE: Sense No Exonic                                            |

|       |              |                                                                                                   |
|-------|--------------|---------------------------------------------------------------------------------------------------|
| -2.10 | ---          | Non-coding transcript identified by NONCODE: Sense No Exonic                                      |
| -2.10 | ---          | Non-coding transcript identified by NONCODE: Sense No Exonic                                      |
| -2.10 | ---          | Non-coding transcript identified by NONCODE: Sense No Exonic                                      |
| -2.10 | ---          | Non-coding transcript identified by NONCODE: Sense No Exonic                                      |
| -2.10 | ---          | Non-coding transcript identified by Luo, et al.                                                   |
| -2.10 | ---          | Non-coding transcript identified by Luo, et al.                                                   |
| -2.10 | Olfr1372-ps1 | Mus musculus olfactory receptor 1372, pseudogene 1 (Olfr1372-ps1), non-coding RNA.                |
| -2.10 | ---          | Non-coding transcript identified by Luo, et al.                                                   |
| -2.10 | Gm25965      | predicted gene, 25965 [gene_biotype:snoRNA transcript_biotype:snoRNA]                             |
| -2.11 | Rbp1         | Mus musculus retinol binding protein 1, cellular (Rbp1), mRNA.                                    |
| -2.11 | Nr4a2        | Mus musculus nuclear receptor subfamily 4, group A, member 2 (Nr4a2), transcript variant 2, mRNA. |
| -2.11 | ---          | Non-coding transcript identified by NONCODE: Sense No Exonic                                      |
| -2.11 | Gm25188      | predicted gene, 25188 [gene_biotype:snoRNA transcript_biotype:snoRNA]                             |
| -2.11 | ---          | Non-coding transcript identified by NONCODE: Sense No Exonic                                      |
| -2.11 | ---          | Non-coding transcript identified by NONCODE: Sense No Exonic                                      |
| -2.11 | ---          | Non-coding transcript identified by NONCODE: Sense No Exonic                                      |
| -2.11 | ---          | Non-coding transcript identified by NONCODE: Sense No Exonic                                      |
| -2.11 | ---          | Non-coding transcript identified by NONCODE: Sense No Exonic                                      |
| -2.11 | ---          | Non-coding transcript identified by NONCODE: Sense No Exonic                                      |
| -2.11 | ---          | Non-coding transcript identified by NONCODE: Sense No Exonic                                      |
| -2.11 | ---          | Non-coding transcript identified by NONCODE: Sense No Exonic                                      |
| -2.11 | ---          | Non-coding transcript identified by NONCODE: Sense No Exonic                                      |
| -2.11 | ---          | Non-coding transcript identified by Luo, et al.                                                   |
| -2.11 | ---          | Mus musculus piRNA piR-6499, complete sequence.                                                   |
| -2.11 | ---          | Non-coding transcript identified by NONCODE: Sense No Exonic                                      |
| -2.12 | ---          | Non-coding transcript identified by NONCODE: Linc                                                 |
| -2.12 | Gm27833      | predicted gene, 27833 [gene_biotype:miRNA transcript_biotype:miRNA]                               |
| -2.12 | ---          | Non-coding transcript identified by NONCODE: Antisense                                            |
| -2.12 | ---          | Non-coding transcript identified by NONCODE: Sense No Exonic                                      |
| -2.12 | ---          | Mus musculus cDNA, clone:Y2G0105K02, strand:unspecified.                                          |
| -2.12 | ---          | Non-coding transcript identified by NONCODE: Sense No Exonic                                      |
| -2.12 | ---          | Non-coding transcript identified by NONCODE: Sense No Exonic                                      |
| -2.12 | ---          | Non-coding transcript identified by NONCODE: Sense No Exonic                                      |
| -2.12 | ---          | Non-coding transcript identified by NONCODE: Sense No Exonic                                      |
| -2.12 | ---          | Non-coding transcript identified by NONCODE: Sense No Exonic                                      |
| -2.12 | ---          | Non-coding transcript identified by NONCODE: Sense No Exonic                                      |
| -2.12 | ---          | Non-coding transcript identified by NONCODE: Sense No Exonic                                      |
| -2.12 | ---          | Non-coding transcript identified by NONCODE: Sense No Exonic                                      |
| -2.12 | ---          | Non-coding transcript identified by NONCODE: Sense No Exonic                                      |
| -2.13 | ---          | Mus musculus non-coding RNA, oocyte_clustered_small_RNA1775, complete sequence.                   |
| -2.13 | ---          | Non-coding transcript identified by NONCODE: Sense No Exonic                                      |
| -2.13 | Ctsw         | Mus musculus cathepsin W (Ctsw), mRNA.                                                            |
| -2.13 | ---          | Mus musculus non-coding RNA, oocyte_clustered_small_RNA5234, complete sequence.                   |
| -2.13 | ---          | Mus musculus non-coding RNA, oocyte_clustered_small_RNA5234, complete sequence.                   |
| -2.13 | ---          | Mus musculus non-coding RNA, oocyte_clustered_small_RNA5234, complete sequence.                   |
| -2.13 | ---          | Mus musculus non-coding RNA, oocyte_clustered_small_RNA5234, complete sequence.                   |
| -2.13 | ---          | Mus musculus non-coding RNA, oocyte_clustered_small_RNA5234, complete sequence.                   |
| -2.13 | ---          | Non-coding transcript identified by NONCODE: Sense No Exonic                                      |
| -2.13 | Tmem63a      | Mus musculus transmembrane protein 63a (Tmem63a), mRNA.                                           |
| -2.13 | ---          | Non-coding transcript identified by Luo, et al.                                                   |
| -2.13 | ---          | Non-coding transcript identified by NONCODE: Sense No Exonic                                      |
| -2.13 | Mir5125      | Mus musculus microRNA 5125 (Mir5125), microRNA.                                                   |
| -2.13 | ---          | Non-coding transcript identified by NONCODE: Antisense                                            |
| -2.13 | ---          | Non-coding transcript identified by NONCODE: Sense No Exonic                                      |
| -2.13 | ---          | Non-coding transcript identified by NONCODE: Linc                                                 |
| -2.13 | ---          | Non-coding transcript identified by NONCODE: Sense No Exonic                                      |
| -2.13 | Ccl19        | chemokine (C-C motif) ligand 19, mRNA (cDNA clone MGC:62903 IMAGE:1349213), complete cds.         |
| -2.13 | ---          | Non-coding transcript identified by NONCODE: Sense No Exonic                                      |
| -2.14 | ---          | Non-coding transcript identified by NONCODE: Sense No Exonic                                      |
| -2.14 | Igkv4-71     | immunoglobulin kappa chain variable 4-71                                                          |
| -2.14 | ---          | Non-coding transcript identified by NONCODE: Linc                                                 |
| -2.14 | ---          | Non-coding transcript identified by NONCODE: Sense No Exonic                                      |
| -2.14 | ---          | Non-coding transcript identified by NONCODE: Sense No Exonic                                      |
| -2.14 | Mir153       | Mus musculus microRNA 153 (Mir153), microRNA.                                                     |
| -2.14 | ---          | Non-coding transcript identified by NONCODE: Sense No Exonic                                      |
| -2.14 | ---          | Non-coding transcript identified by NONCODE: Sense No Exonic                                      |
| -2.14 | ---          | Non-coding transcript identified by NONCODE: Sense No Exonic                                      |
| -2.14 | ---          | Non-coding transcript identified by NONCODE: Sense No Exonic                                      |
| -2.14 | ---          | Non-coding transcript identified by NONCODE: Sense No Exonic                                      |
| -2.14 | ---          | Non-coding transcript identified by Luo, et al.                                                   |
| -2.14 | ---          | Non-coding transcript identified by NONCODE: Sense No Exonic                                      |
| -2.14 | ---          | Non-coding transcript identified by NONCODE: Sense No Exonic                                      |
| -2.14 | ---          | Non-coding transcript identified by NONCODE: Antisense                                            |
| -2.14 | ---          | Non-coding transcript identified by NONCODE: Linc                                                 |
| -2.14 | ---          | Non-coding transcript identified by NONCODE: Sense No Exonic                                      |

|       |           |                                                                                 |
|-------|-----------|---------------------------------------------------------------------------------|
| -2.14 | ---       | Non-coding transcript identified by NONCODE: Sense No Exonic                    |
| -2.14 | ---       | Non-coding transcript identified by NONCODE: Sense No Exonic                    |
| -2.14 | ---       | Non-coding transcript identified by NONCODE: Sense No Exonic                    |
| -2.14 | ---       | Non-coding transcript identified by NONCODE: Linc                               |
| -2.15 | ---       | Non-coding transcript identified by NONCODE: Sense No Exonic                    |
| -2.15 | Gm17613   | predicted gene, 17613 [gene_biotype:lincRNA transcript_biotype:lincRNA]         |
| -2.15 | ---       | Non-coding transcript identified by NONCODE: Sense No Exonic                    |
| -2.15 | ---       | Non-coding transcript identified by NONCODE: Sense No Exonic                    |
| -2.15 | Mir7667   | Mus musculus microRNA 7667 (Mir7667), microRNA.                                 |
| -2.15 | ---       | Non-coding transcript identified by NONCODE: Sense No Exonic                    |
| -2.15 | ---       | Non-coding transcript identified by NONCODE: Sense No Exonic                    |
| -2.15 | ---       | Non-coding transcript identified by NONCODE: Sense No Exonic                    |
| -2.15 | Snord90   | Mus musculus small nucleolar RNA, C/D box 90 (Snord90), small nucleolar RNA.    |
| -2.15 | ---       | Non-coding transcript identified by NONCODE: Linc                               |
| -2.15 | ---       | Non-coding transcript identified by Luo, et al.                                 |
| -2.15 | ---       | Non-coding transcript identified by NONCODE: Sense No Exonic                    |
| -2.15 | ---       | Non-coding transcript identified by NONCODE: Linc                               |
| -2.15 | ---       | Non-coding transcript identified by NONCODE: Linc                               |
| -2.15 | ---       | Non-coding transcript identified by NONCODE: Sense No Exonic                    |
| -2.16 | ---       | Non-coding transcript identified by NONCODE: Sense No Exonic                    |
| -2.16 | ---       | Non-coding transcript identified by NONCODE: Sense No Exonic                    |
| -2.16 | ---       | Non-coding transcript identified by NONCODE: Sense No Exonic                    |
| -2.16 | ---       | Non-coding transcript identified by NONCODE: Linc                               |
| -2.16 | ---       | Non-coding transcript identified by Luo, et al.                                 |
| -2.16 | Ccl19-ps1 | chemokine (C-C motif) ligand 19, pseudogene 1                                   |
| -2.16 | ---       | Non-coding transcript identified by NONCODE: Sense No Exonic                    |
| -2.16 | Gm22849   | predicted gene, 22849                                                           |
| -2.16 | ---       | Non-coding transcript identified by Luo, et al.                                 |
| -2.16 | ---       | Non-coding transcript identified by NONCODE: Linc                               |
| -2.16 | ---       | Non-coding transcript identified by NONCODE: Sense No Exonic                    |
| -2.16 | ---       | Non-coding transcript identified by NONCODE: Sense No Exonic                    |
| -2.16 | ---       | Non-coding transcript identified by NONCODE: Linc                               |
| -2.16 | ---       | Non-coding transcript identified by NONCODE: Sense No Exonic                    |
| -2.16 | Mir344c   | Mus musculus microRNA 344c (Mir344c), microRNA.                                 |
| -2.17 | ---       | Non-coding transcript identified by NONCODE: Sense No Exonic                    |
| -2.17 | ---       | Non-coding transcript identified by NONCODE: Sense No Exonic                    |
| -2.17 | ---       | Non-coding transcript identified by Luo, et al.                                 |
| -2.17 | ---       | Non-coding transcript identified by NONCODE: Antisense                          |
| -2.17 | ---       | Non-coding transcript identified by NONCODE: Sense No Exonic                    |
| -2.17 | ---       | Non-coding transcript identified by NONCODE: Linc                               |
| -2.17 | ---       | Non-coding transcript identified by NONCODE: Sense No Exonic                    |
| -2.17 | ---       | Non-coding transcript identified by NONCODE: Sense No Exonic                    |
| -2.17 | Gm25630   | predicted gene, 25630 [gene_biotype:snRNA transcript_biotype:snRNA]             |
| -2.17 | ---       | Non-coding transcript identified by NONCODE: Sense No Exonic                    |
| -2.17 | ---       | Non-coding transcript identified by NONCODE: Sense No Exonic                    |
| -2.17 | Mir340    | Mus musculus microRNA 340 (Mir340), microRNA.                                   |
| -2.17 | ---       | Non-coding transcript identified by NONCODE: Sense No Exonic                    |
| -2.17 | ---       | Non-coding transcript identified by NONCODE: Sense No Exonic                    |
| -2.17 | ---       | Non-coding transcript identified by NONCODE: Sense No Exonic                    |
| -2.17 | ---       | Non-coding transcript identified by NONCODE: Sense No Exonic                    |
| -2.17 | ---       | Non-coding transcript identified by NONCODE: Linc                               |
| -2.18 | ---       | Non-coding transcript identified by NONCODE: Sense No Exonic                    |
| -2.18 | ---       | Non-coding transcript identified by Luo, et al.                                 |
| -2.18 | ---       | Non-coding transcript identified by NONCODE: Sense No Exonic                    |
| -2.18 | Tlr6      | Mus musculus toll-like receptor 6 (Tlr6), mRNA.                                 |
| -2.18 | ---       | Non-coding transcript identified by NONCODE: Sense No Exonic                    |
| -2.18 | Ccl19     | Mus musculus chemokine (C-C motif) ligand 19 (Ccl19), mRNA.                     |
| -2.18 | ---       | Non-coding transcript identified by NONCODE: Sense No Exonic                    |
| -2.18 | Hinfp     | Mus musculus histone H4 transcription factor (Hinfp), mRNA.                     |
| -2.18 | Snord71   | Mus musculus small nucleolar RNA, C/D box 71 (Snord71), small nucleolar RNA.    |
| -2.18 | Gm22961   | predicted gene, 22961 [gene_biotype:snRNA transcript_biotype:snRNA]             |
| -2.18 | ---       | Non-coding transcript identified by NONCODE: Sense No Exonic                    |
| -2.19 | Mir495    | Mus musculus microRNA 495 (Mir495), microRNA.                                   |
| -2.19 | ---       | Non-coding transcript identified by NONCODE: Sense No Exonic                    |
| -2.19 | ---       | Mus musculus non-coding RNA, oocyte_clustered_small_RNA5235, complete sequence. |
| -2.19 | ---       | Mus musculus non-coding RNA, oocyte_clustered_small_RNA5035, complete sequence. |
| -2.19 | ---       | Non-coding transcript identified by NONCODE: Sense No Exonic                    |
| -2.19 | ---       | Non-coding transcript identified by NONCODE: Sense No Exonic                    |
| -2.19 | ---       | Non-coding transcript identified by NONCODE: Sense No Exonic                    |
| -2.19 | ---       | Non-coding transcript identified by NONCODE: Sense No Exonic                    |
| -2.19 | ---       | Non-coding transcript identified by NONCODE: Sense No Exonic                    |
| -2.19 | ---       | Non-coding transcript identified by NONCODE: Sense No Exonic                    |
| -2.19 | ---       | Non-coding transcript identified by NONCODE: Sense No Exonic                    |
| -2.19 | ---       | Mus musculus cDNA, clone:Y2G0114P17, strand:unspecified.                        |
| -2.19 | Gm26493   | predicted gene, 26493 [gene_biotype:snoRNA transcript_biotype:snoRNA]           |
| -2.19 | ---       | Non-coding transcript identified by NONCODE: Sense No Exonic                    |
| -2.19 | ---       | Non-coding transcript identified by NONCODE: Antisense                          |

|       |          |                                                                                                      |
|-------|----------|------------------------------------------------------------------------------------------------------|
| -2.19 | ---      | Non-coding transcript identified by NONCODE: Sense No Exonic                                         |
| -2.19 | ---      | Non-coding transcript identified by NONCODE: Sense No Exonic                                         |
| -2.20 | ---      | Non-coding transcript identified by NONCODE: Sense No Exonic                                         |
| -2.20 | Gm12272  | predicted gene 12272 [gene_biotype:antisense transcript_biotype:antisense]                           |
| -2.20 | ---      | Non-coding transcript identified by NONCODE: Sense No Exonic                                         |
| -2.20 | ---      | Non-coding transcript identified by NONCODE: Sense No Exonic                                         |
| -2.20 | ---      | Non-coding transcript identified by NONCODE: Sense No Exonic                                         |
| -2.20 | ---      | Non-coding transcript identified by NONCODE: Sense No Exonic                                         |
| -2.20 | ---      | Non-coding transcript identified by NONCODE: Sense No Exonic                                         |
| -2.20 | ---      | Non-coding transcript identified by NONCODE: Linc                                                    |
| -2.20 | Mir540   | Mus musculus microRNA 540 (Mir540), microRNA.                                                        |
| -2.20 | ---      | Non-coding transcript identified by NONCODE: Linc                                                    |
| -2.20 | ---      | Non-coding transcript identified by NONCODE: Sense No Exonic                                         |
| -2.20 | ---      | Non-coding transcript identified by NONCODE: Sense No Exonic                                         |
| -2.20 | ---      | Non-coding transcript identified by NONCODE: Linc                                                    |
| -2.20 | Gm23421  | predicted gene, 23421 [gene_biotype:snRNA transcript_biotype:snRNA]                                  |
| -2.20 | ---      | Non-coding transcript identified by NONCODE: Sense No Exonic                                         |
| -2.20 | ---      | Non-coding transcript identified by NONCODE: Sense No Exonic                                         |
| -2.20 | Prox2os  | prospero homeobox 2 opposite strand [gene_biotype:antisense transcript_biotype:antisense]            |
| -2.20 | Gm19274  | PREDICTED: predicted gene, 19274 (Gm19274), miscRNA.                                                 |
| -2.21 | ---      | Non-coding transcript identified by NONCODE: Sense No Exonic                                         |
| -2.21 | Bgn      | Mus musculus biglycan (Bgn), mRNA.                                                                   |
| -2.21 | ---      | Non-coding transcript identified by NONCODE: Sense No Exonic                                         |
| -2.21 | ---      | Non-coding transcript identified by NONCODE: Antisense                                               |
| -2.21 | ---      | Non-coding transcript identified by NONCODE: Sense No Exonic                                         |
| -2.21 | ---      | Non-coding transcript identified by NONCODE: Sense No Exonic                                         |
| -2.21 | ---      | Mus musculus non-coding RNA, oocyte_clustered_small_RNA8061, complete sequence.                      |
| -2.21 | ---      | Non-coding transcript identified by NONCODE: Sense No Exonic                                         |
| -2.21 | Phxr1    | Mus musculus per-hexamer repeat gene 1, mRNA (cDNA clone MGC:141431 IMAGE:40061632), complete cds.   |
| -2.21 | ---      | Non-coding transcript identified by NONCODE: Sense No Exonic                                         |
| -2.21 | ---      | Non-coding transcript identified by Luo, et al.                                                      |
| -2.21 | ---      | Non-coding transcript identified by NONCODE: Sense No Exonic                                         |
| -2.21 | Gm25747  | predicted gene, 25747 [gene_biotype:miRNA transcript_biotype:miRNA]                                  |
| -2.22 | ---      | Non-coding transcript identified by NONCODE: Antisense                                               |
| -2.22 | ---      | Non-coding transcript identified by NONCODE: Sense No Exonic                                         |
| -2.22 | ---      | Non-coding transcript identified by NONCODE: Sense No Exonic                                         |
| -2.22 | ---      | Non-coding transcript identified by Luo, et al.                                                      |
| -2.22 | ---      | Non-coding transcript identified by NONCODE: Linc                                                    |
| -2.22 | ---      | Non-coding transcript identified by NONCODE: Sense No Exonic                                         |
| -2.22 | ---      | Non-coding transcript identified by NONCODE: Sense No Exonic                                         |
| -2.22 | ---      | Non-coding transcript identified by NONCODE: Sense No Exonic                                         |
| -2.22 | ---      | Non-coding transcript identified by NONCODE: Sense No Exonic                                         |
| -2.22 | Mir7027  | Mus musculus microRNA 7027 (Mir7027), microRNA.                                                      |
| -2.22 | ---      | Non-coding transcript identified by NONCODE: Sense No Exonic                                         |
| -2.22 | ---      | Non-coding transcript identified by NONCODE: Sense No Exonic                                         |
| -2.22 | Ighv8-5  | immunoglobulin heavy variable V8-5                                                                   |
| -2.22 | ---      | Non-coding transcript identified by NONCODE: Sense No Exonic                                         |
| -2.22 | ---      | Non-coding transcript identified by NONCODE: Sense No Exonic                                         |
| -2.22 | Cldn5    | Mus musculus claudin 5 (Cldn5), mRNA.                                                                |
| -2.22 | ---      | Non-coding transcript identified by NONCODE: Linc                                                    |
| -2.22 | ---      | Non-coding transcript identified by NONCODE: Sense No Exonic                                         |
| -2.23 | ---      | Non-coding transcript identified by NONCODE: Sense No Exonic                                         |
| -2.23 | ---      | Non-coding transcript identified by NONCODE: Sense No Exonic                                         |
| -2.23 | ---      | Non-coding transcript identified by NONCODE: Sense No Exonic                                         |
| -2.23 | ---      | Non-coding transcript identified by NONCODE: Sense No Exonic                                         |
| -2.23 | Gpc3     | Mus musculus glypican 3 (Gpc3), mRNA.                                                                |
| -2.23 | ---      | Non-coding transcript identified by NONCODE: Sense No Exonic                                         |
| -2.23 | ---      | Non-coding transcript identified by Luo, et al.                                                      |
| -2.23 | Igkv4-80 | immunoglobulin kappa variable 4-80                                                                   |
| -2.23 | ---      | Non-coding transcript identified by NONCODE: Sense No Exonic                                         |
| -2.23 | ---      | Non-coding transcript identified by NONCODE: Sense No Exonic                                         |
| -2.23 | ---      | Non-coding transcript identified by Luo, et al.                                                      |
| -2.23 | ---      | Non-coding transcript identified by Luo, et al.                                                      |
| -2.23 | ---      | Non-coding transcript identified by Luo, et al.                                                      |
| -2.23 | ---      | Non-coding transcript identified by Luo, et al.                                                      |
| -2.23 | ---      | Non-coding transcript identified by Luo, et al.                                                      |
| -2.23 | ---      | Non-coding transcript identified by NONCODE: Sense No Exonic                                         |
| -2.23 | ---      | Non-coding transcript identified by NONCODE: Linc                                                    |
| -2.24 | Gm14301  | predicted gene 14301 [gene_biotype:unprocessed_pseudogene transcript_biotype:unprocessed_pseudogene] |
| -2.24 | Gm24968  | predicted gene, 24968 [gene_biotype:snRNA transcript_biotype:snRNA]                                  |
| -2.24 | ---      | Mus musculus non-coding RNA, oocyte_clustered_small_RNA12929, complete sequence.                     |
| -2.24 | ---      | Non-coding transcript identified by NONCODE: Sense No Exonic                                         |
| -2.24 | Mir384   | Mus musculus microRNA 384 (Mir384), microRNA.                                                        |
| -2.24 | ---      | Non-coding transcript identified by NONCODE: Sense No Exonic                                         |
| -2.24 | ---      | Non-coding transcript identified by NONCODE: Sense No Exonic                                         |
| -2.25 | Gm26204  | predicted gene, 26204 [gene_biotype:snRNA transcript_biotype:snRNA]                                  |
| -2.25 | ---      | Non-coding transcript identified by NONCODE: Sense No Exonic                                         |





|       |               |                                                                                                       |
|-------|---------------|-------------------------------------------------------------------------------------------------------|
| -2.31 | Snord53       | Mus musculus small nucleolar RNA, C/D box 53 (Snord53), small nucleolar RNA.                          |
| -2.31 | ---           | Non-coding transcript identified by NONCODE: Sense No Exonic                                          |
| -2.31 | ---           | Sequence 120 from Patent WO2009144481.                                                                |
| -2.31 | ---           | Non-coding transcript identified by NONCODE: Linc                                                     |
| -2.31 | Rbm25         | RNA binding motif protein 25                                                                          |
| -2.31 | Igkv4-62      | immunoglobulin kappa variable 4-62                                                                    |
| -2.31 | ---           | Non-coding transcript identified by NONCODE: Sense No Exonic                                          |
| -2.32 | Mir15b        | Mus musculus microRNA 15b (Mir15b), microRNA.                                                         |
| -2.32 | ---           | Non-coding transcript identified by NONCODE: Sense No Exonic                                          |
| -2.32 | ---           | Non-coding transcript identified by NONCODE: Sense No Exonic                                          |
| -2.32 | Pdgfd         | Mus musculus platelet-derived growth factor, D polypeptide (Pdgfd), mRNA.                             |
| -2.32 | ---           | Non-coding transcript identified by NONCODE: Sense No Exonic                                          |
| -2.32 | ---           | Non-coding transcript identified by NONCODE: Sense No Exonic                                          |
| -2.32 | ---           | Non-coding transcript identified by NONCODE: Sense No Exonic                                          |
| -2.32 | ---           | Non-coding transcript identified by NONCODE: Linc                                                     |
| -2.32 | ---           | Non-coding transcript identified by Luo, et al.                                                       |
| -2.32 | ---           | Non-coding transcript identified by Luo, et al.                                                       |
| -2.32 | ---           | Non-coding transcript identified by NONCODE: Sense No Exonic                                          |
| -2.33 | ---           | Non-coding transcript identified by NONCODE: Sense No Exonic                                          |
| -2.33 | ---           | Non-coding transcript identified by NONCODE: Sense No Exonic                                          |
| -2.33 | ---           | Non-coding transcript identified by NONCODE: Sense No Exonic                                          |
| -2.33 | ---           | Non-coding transcript identified by NONCODE: Antisense                                                |
| -2.33 | Gm17224       | predicted gene 17224 [gene_biotype:antisense transcript_biotype:antisense]                            |
| -2.33 | 9530091C08Rik | Mus musculus RIKEN cDNA 9530091C08 gene (9530091C08Rik), long non-coding RNA.                         |
| -2.33 | ---           | Non-coding transcript identified by NONCODE: Linc                                                     |
| -2.33 | Gm22380       | predicted gene, 22380 [gene_biotype:snoRNA transcript_biotype:snoRNA]                                 |
| -2.33 | ---           | Non-coding transcript identified by NONCODE: Antisense,Sense No Exonic                                |
| -2.34 | ---           | Non-coding transcript identified by NONCODE: Sense No Exonic                                          |
| -2.34 | Ccl19         | chemokine (C-C motif) ligand 19, mRNA (cDNA clone MGC:62903 IMAGE:1349213), complete cds.             |
| -2.34 | Gm15176       | predicted gene 15176 [gene_biotype:processed_pseudogene transcript_biotype:processed_pseudogene]      |
| -2.34 | ---           | Non-coding transcript identified by NONCODE: Sense No Exonic                                          |
| -2.34 | ---           | Non-coding transcript identified by NONCODE: Sense No Exonic                                          |
| -2.34 | ---           | Non-coding transcript identified by NONCODE: Sense No Exonic                                          |
| -2.34 | ---           | Non-coding transcript identified by NONCODE: Sense No Exonic                                          |
| -2.34 | Mir466        | Mus musculus microRNA 466 (Mir466), microRNA.                                                         |
| -2.34 | ---           | Non-coding transcript identified by NONCODE: Sense No Exonic                                          |
| -2.34 | ---           | Non-coding transcript identified by NONCODE: Sense No Exonic                                          |
| -2.34 | Gm19552       | PREDICTED: predicted gene, 19552 (Gm19552), miscRNA.                                                  |
| -2.35 | ---           | Non-coding transcript identified by NONCODE: Sense No Exonic                                          |
| -2.35 | Gm24771       | predicted gene, 24771 [gene_biotype:snoRNA transcript_biotype:snoRNA]                                 |
| -2.35 | Gm26189       | predicted gene, 26189 [gene_biotype:snRNA transcript_biotype:snRNA]                                   |
| -2.35 | ---           | Non-coding transcript identified by NONCODE: Sense No Exonic                                          |
| -2.35 | Gm10197       | predicted gene 10197 [gene_biotype:protein_coding transcript_biotype:protein_coding]                  |
| -2.35 | ---           | Mus musculus piRNA piR-140471, complete sequence.                                                     |
| -2.35 | ---           | Non-coding transcript identified by NONCODE: Sense No Exonic                                          |
| -2.35 | ---           | Non-coding transcript identified by NONCODE: Sense No Exonic                                          |
| -2.35 | ---           | Non-coding transcript identified by NONCODE: Sense No Exonic                                          |
| -2.35 | ---           | Non-coding transcript identified by NONCODE: Sense No Exonic                                          |
| -2.35 | ---           | Non-coding transcript identified by NONCODE: Sense No Exonic                                          |
| -2.35 | ---           | Non-coding transcript identified by NONCODE: Sense No Exonic                                          |
| -2.35 | Igkv4-59      | immunoglobulin kappa variable 4-59                                                                    |
| -2.36 | ---           | Non-coding transcript identified by NONCODE: Antisense,Sense No Exonic                                |
| -2.36 | ---           | Non-coding transcript identified by NONCODE: Sense No Exonic                                          |
| -2.36 | Mir7073       | Mus musculus microRNA 7073 (Mir7073), microRNA.                                                       |
| -2.36 | ---           | Non-coding transcript identified by NONCODE: Sense No Exonic                                          |
| -2.36 | Mir200b       | Mus musculus microRNA 200b (Mir200b), microRNA.                                                       |
| -2.36 | ---           | Non-coding transcript identified by NONCODE: Sense No Exonic                                          |
| -2.36 | Gm24319       | predicted gene, 24319 [gene_biotype:snRNA transcript_biotype:snRNA]                                   |
| -2.36 | ---           | Non-coding transcript identified by NONCODE: Sense No Exonic                                          |
| -2.36 | ---           | Non-coding transcript identified by NONCODE: Antisense                                                |
| -2.36 | ---           | Non-coding transcript identified by NONCODE: Linc                                                     |
| -2.36 | Kcnab3        | Mus musculus potassium voltage-gated channel, shaker-related subfamily, beta member 3 (Kcnab3), mRNA. |
| -2.37 | ---           | Non-coding transcript identified by NONCODE: Sense No Exonic                                          |
| -2.37 | ---           | Non-coding transcript identified by NONCODE: Sense No Exonic                                          |
| -2.37 | ---           | Non-coding transcript identified by NONCODE: Sense No Exonic                                          |
| -2.37 | ---           | Non-coding transcript identified by NONCODE: Sense No Exonic                                          |
| -2.37 | ---           | Non-coding transcript identified by NONCODE: Sense No Exonic                                          |
| -2.37 | ---           | Non-coding transcript identified by NONCODE: Linc                                                     |
| -2.37 | ---           | Non-coding transcript identified by NONCODE: Sense No Exonic                                          |
| -2.37 | ---           | Non-coding transcript identified by Luo, et al.                                                       |
| -2.37 | Gm23593       | predicted gene, 23593 [gene_biotype:snoRNA transcript_biotype:snoRNA]                                 |
| -2.37 | Gm24530       | predicted gene, 24530                                                                                 |
| -2.37 | ---           | Non-coding transcript identified by NONCODE: Linc                                                     |
| -2.37 | ---           | Non-coding transcript identified by NONCODE: Linc                                                     |
| -2.37 | ---           | Non-coding transcript identified by NONCODE: Sense No Exonic                                          |
| -2.37 | ---           | Non-coding transcript identified by NONCODE: Sense No Exonic                                          |

|       |          |                                                                                      |
|-------|----------|--------------------------------------------------------------------------------------|
| -2.37 | Igkv8-28 | immunoglobulin kappa variable 8-28                                                   |
| -2.38 | ---      | Non-coding transcript identified by NONCODE: Sense No Exonic                         |
| -2.38 | ---      | Non-coding transcript identified by NONCODE: Sense No Exonic                         |
| -2.38 | ---      | Non-coding transcript identified by NONCODE: Sense No Exonic                         |
| -2.38 | ---      | Non-coding transcript identified by NONCODE: Sense No Exonic                         |
| -2.38 | ---      | Non-coding transcript identified by NONCODE: Linc                                    |
| -2.38 | Gm23654  | predicted gene, 23654 [gene_biotype:miRNA transcript_biotype:miRNA]                  |
| -2.38 | ---      | Non-coding transcript identified by NONCODE: Sense No Exonic                         |
| -2.38 | ---      | Non-coding transcript identified by NONCODE: Sense No Exonic                         |
| -2.38 | ---      | Non-coding transcript identified by NONCODE: Sense No Exonic                         |
| -2.38 | ---      | Non-coding transcript identified by NONCODE: Sense No Exonic                         |
| -2.38 | ---      | Non-coding transcript identified by NONCODE: Sense No Exonic                         |
| -2.39 | ---      | Non-coding transcript identified by NONCODE: Sense No Exonic                         |
| -2.39 | Iglv2    | immunoglobulin lambda variable 2                                                     |
| -2.39 | Igkv3-1  | immunoglobulin kappa variable 3-1                                                    |
| -2.39 | Gm20115  | PREDICTED: predicted gene, 20115 (Gm20115), miscRNA.                                 |
| -2.39 | ---      | Non-coding transcript identified by NONCODE: Sense No Exonic                         |
| -2.40 | Igkv4-57 | immunoglobulin kappa variable 4-57                                                   |
| -2.40 | ---      | Non-coding transcript identified by NONCODE: Antisense                               |
| -2.40 | ---      | Mus musculus non-coding RNA, oocyte_piRNA2117, complete sequence.                    |
| -2.40 | ---      | Non-coding transcript identified by NONCODE: Antisense                               |
| -2.40 | ---      | Non-coding transcript identified by NONCODE: Sense No Exonic                         |
| -2.40 | Gm26255  | predicted gene, 26255 [gene_biotype:snRNA transcript_biotype:snRNA]                  |
| -2.40 | ---      | Non-coding transcript identified by NONCODE: Linc                                    |
| -2.40 | ---      | Non-coding transcript identified by NONCODE: Sense No Exonic                         |
| -2.40 | ---      | Non-coding transcript identified by Luo, et al.                                      |
| -2.40 | ---      | Non-coding transcript identified by NONCODE: Sense No Exonic                         |
| -2.40 | ---      | Non-coding transcript identified by NONCODE: Antisense                               |
| -2.40 | ---      | Non-coding transcript identified by NONCODE: Antisense                               |
| -2.40 | ---      | Non-coding transcript identified by NONCODE: Linc                                    |
| -2.40 | ---      | Non-coding transcript identified by NONCODE: Sense No Exonic                         |
| -2.40 | Mir8118  | Mus musculus microRNA 8118 (Mir8118), microRNA.                                      |
| -2.41 | ---      | Non-coding transcript identified by Luo, et al.                                      |
| -2.41 | ---      | Non-coding transcript identified by NONCODE: Sense No Exonic                         |
| -2.41 | ---      | Non-coding transcript identified by NONCODE: Sense No Exonic                         |
| -2.41 | Gm11096  | predicted gene 11096 [gene_biotype:protein_coding transcript_biotype:protein_coding] |
| -2.41 | ---      | Non-coding transcript identified by NONCODE: Linc                                    |
| -2.41 | ---      | Non-coding transcript identified by NONCODE: Linc                                    |
| -2.41 | Gm24916  | predicted gene, 24916 [gene_biotype:snoRNA transcript_biotype:snoRNA]                |
| -2.41 | ---      | Non-coding transcript identified by NONCODE: Sense No Exonic                         |
| -2.41 | ---      | Non-coding transcript identified by Luo, et al.                                      |
| -2.42 | ---      | Non-coding transcript identified by NONCODE: Sense No Exonic                         |
| -2.42 | Gm12407  | predicted gene 12407                                                                 |
| -2.42 | ---      | Non-coding transcript identified by NONCODE: Sense No Exonic                         |
| -2.42 | ---      | Non-coding transcript identified by NONCODE: Sense No Exonic                         |
| -2.42 | Gm19629  | PREDICTED: predicted gene, 19629 (Gm19629), miscRNA.                                 |
| -2.42 | ---      | Non-coding transcript identified by NONCODE: Sense No Exonic                         |
| -2.42 | ---      | Non-coding transcript identified by NONCODE: Linc                                    |
| -2.42 | ---      | Non-coding transcript identified by NONCODE: Sense No Exonic                         |
| -2.42 | ---      | Non-coding transcript identified by NONCODE: Sense No Exonic                         |
| -2.43 | ---      | Non-coding transcript identified by NONCODE: Sense No Exonic                         |
| -2.43 | Gm24119  | predicted gene, 24119 [gene_biotype:snoRNA transcript_biotype:snoRNA]                |
| -2.43 | ---      | Non-coding transcript identified by NONCODE: Sense No Exonic                         |
| -2.43 | ---      | Non-coding transcript identified by NONCODE: Sense No Exonic                         |
| -2.43 | Rnu6     | Mus musculus U6 small nuclear RNA (Rnu6), small nuclear RNA.                         |
| -2.43 | ---      | Non-coding transcript identified by NONCODE: Sense No Exonic                         |
| -2.43 | ---      | Mus musculus non-coding RNA, oocyte_clustered_small_RNA992, complete sequence.       |
| -2.43 | Mir544   | microRNA 544                                                                         |
| -2.43 | ---      | Non-coding transcript identified by NONCODE: Sense No Exonic                         |
| -2.43 | ---      | Non-coding transcript identified by NONCODE: Sense No Exonic                         |
| -2.43 | ---      | Non-coding transcript identified by Luo, et al.                                      |
| -2.44 | ---      | Non-coding transcript identified by NONCODE: Sense No Exonic                         |
| -2.44 | ---      | Non-coding transcript identified by NONCODE: Sense No Exonic                         |
| -2.44 | ---      | Non-coding transcript identified by Luo, et al.                                      |
| -2.44 | ---      | Non-coding transcript identified by Luo, et al.                                      |
| -2.44 | ---      | Non-coding transcript identified by NONCODE: Sense No Exonic                         |
| -2.44 | ---      | Non-coding transcript identified by Luo, et al.                                      |
| -2.44 | Gm24568  | predicted gene, 24568 [gene_biotype:snoRNA transcript_biotype:snoRNA]                |
| -2.45 | ---      | Non-coding transcript identified by NONCODE: Sense No Exonic                         |
| -2.45 | ---      | Non-coding transcript identified by NONCODE: Sense No Exonic                         |
| -2.45 | Scarna3b | Mus musculus small Cajal body-specific RNA 3B (Scarna3b), guide RNA.                 |
| -2.45 | ---      | Non-coding transcript identified by NONCODE: Linc                                    |
| -2.45 | Cd3g     | Mus musculus CD3 antigen, gamma polypeptide (Cd3g), mRNA.                            |
| -2.45 | ---      | Non-coding transcript identified by NONCODE: Antisense                               |
| -2.46 | ---      | Non-coding transcript identified by NONCODE: Linc                                    |
| -2.46 | Gm24412  | predicted gene, 24412 [gene_biotype:snoRNA transcript_biotype:snoRNA]                |

|       |          |                                                                                        |
|-------|----------|----------------------------------------------------------------------------------------|
| -2.46 | ---      | Non-coding transcript identified by NONCODE: Sense No Exonic                           |
| -2.46 | ---      | Non-coding transcript identified by NONCODE: Sense No Exonic                           |
| -2.46 | Fbln5    | Mus musculus fibulin 5 (Fbln5), mRNA.                                                  |
| -2.47 | ---      | Non-coding transcript identified by NONCODE: Sense No Exonic                           |
| -2.47 | Ccl8     | Mus musculus chemokine (C-C motif) ligand 8 (Ccl8), mRNA.                              |
| -2.47 | Gm25856  | predicted gene, 25856 [gene_biotype:snoRNA transcript_biotype:snoRNA]                  |
| -2.47 | ---      | Non-coding transcript identified by NONCODE: Sense No Exonic                           |
| -2.47 | ---      | Non-coding transcript identified by NONCODE: Sense No Exonic                           |
| -2.47 | Acta2    | Mus musculus actin, alpha 2, smooth muscle, aorta (Acta2), mRNA.                       |
| -2.47 | ---      | Non-coding transcript identified by NONCODE: Sense No Exonic                           |
| -2.48 | ---      | Mus musculus piRNA piR-6897, complete sequence.                                        |
| -2.48 | ---      | Non-coding transcript identified by NONCODE: Linc                                      |
| -2.48 | ---      | Non-coding transcript identified by NONCODE: Sense No Exonic                           |
| -2.48 | ---      | Non-coding transcript identified by NONCODE: Sense No Exonic                           |
| -2.48 | ---      | Non-coding transcript identified by NONCODE: Sense No Exonic                           |
| -2.49 | Gm24022  | predicted gene, 24022 [gene_biotype:miRNA transcript_biotype:miRNA]                    |
| -2.49 | ---      | Non-coding transcript identified by NONCODE: Sense No Exonic                           |
| -2.49 | ---      | Non-coding transcript identified by NONCODE: Sense No Exonic                           |
| -2.49 | ---      | Non-coding transcript identified by NONCODE: Sense No Exonic                           |
| -2.49 | ---      | Non-coding transcript identified by Luo, et al.                                        |
| -2.49 | ---      | Non-coding transcript identified by NONCODE: Antisense                                 |
| -2.49 | ---      | Non-coding transcript identified by NONCODE: Sense No Exonic                           |
| -2.49 | ---      | Non-coding transcript identified by NONCODE: Sense No Exonic                           |
| -2.49 | ---      | Non-coding transcript identified by NONCODE: Sense No Exonic                           |
| -2.49 | ---      | Non-coding transcript identified by NONCODE: Sense No Exonic                           |
| -2.49 | ---      | Non-coding transcript identified by NONCODE: Linc                                      |
| -2.50 | ---      | Non-coding transcript identified by NONCODE: Sense No Exonic                           |
| -2.50 | ---      | Non-coding transcript identified by NONCODE: Sense No Exonic                           |
| -2.50 | Gm25430  | predicted gene, 25430                                                                  |
| -2.50 | Igkv4-72 | immunoglobulin kappa chain variable 4-72                                               |
| -2.50 | ---      | Non-coding transcript identified by NONCODE: Sense No Exonic                           |
| -2.51 | ---      | Non-coding transcript identified by NONCODE: Sense No Exonic                           |
| -2.51 | ---      | Non-coding transcript identified by Luo, et al.                                        |
| -2.51 | ---      | Non-coding transcript identified by Luo, et al.                                        |
| -2.51 | ---      | Non-coding transcript identified by Luo, et al.                                        |
| -2.51 | ---      | Non-coding transcript identified by NONCODE: Antisense                                 |
| -2.51 | ---      | Non-coding transcript identified by NONCODE: Sense No Exonic                           |
| -2.52 | ---      | Non-coding transcript identified by Luo, et al.                                        |
| -2.52 | ---      | Non-coding transcript identified by NONCODE: Sense No Exonic                           |
| -2.52 | ---      | Non-coding transcript identified by NONCODE: Sense No Exonic                           |
| -2.52 | Lsp1     | Mus musculus lymphocyte specific 1 (Lsp1), transcript variant 1, mRNA.                 |
| -2.52 | ---      | Non-coding transcript identified by NONCODE: Sense No Exonic                           |
| -2.52 | Gm26788  | predicted gene, 26788 [gene_biotype:processed_transcript transcript_biotype:antisense] |
| -2.52 | ---      | Non-coding transcript identified by NONCODE: Sense No Exonic                           |
| -2.52 | ---      | Non-coding transcript identified by NONCODE: Sense No Exonic                           |
| -2.52 | ---      | Mus musculus non-coding RNA, oocyte_clustered_small_RNA11978, complete sequence.       |
| -2.52 | ---      | Mus musculus non-coding RNA, oocyte_clustered_small_RNA11978, complete sequence.       |
| -2.52 | ---      | Mus musculus non-coding RNA, oocyte_clustered_small_RNA11978, complete sequence.       |
| -2.52 | ---      | Mus musculus non-coding RNA, oocyte_clustered_small_RNA11987, complete sequence.       |
| -2.52 | ---      | Mus musculus non-coding RNA, oocyte_clustered_small_RNA11987, complete sequence.       |
| -2.52 | ---      | Mus musculus non-coding RNA, oocyte_clustered_small_RNA11978, complete sequence.       |
| -2.52 | ---      | Mus musculus non-coding RNA, oocyte_clustered_small_RNA11987, complete sequence.       |
| -2.52 | ---      | Mus musculus non-coding RNA, oocyte_clustered_small_RNA11978, complete sequence.       |
| -2.52 | ---      | Mus musculus non-coding RNA, oocyte_clustered_small_RNA11987, complete sequence.       |
| -2.52 | ---      | Mus musculus non-coding RNA, oocyte_clustered_small_RNA11978, complete sequence.       |
| -2.52 | ---      | Mus musculus non-coding RNA, oocyte_clustered_small_RNA11987, complete sequence.       |
| -2.52 | ---      | Mus musculus non-coding RNA, oocyte_clustered_small_RNA11978, complete sequence.       |
| -2.52 | ---      | Mus musculus non-coding RNA, oocyte_clustered_small_RNA11987, complete sequence.       |
| -2.53 | ---      | Non-coding transcript identified by NONCODE: Sense No Exonic                           |
| -2.54 | Sell     | Mus musculus selectin, lymphocyte (Sell), transcript variant 2, mRNA.                  |
| -2.54 | ---      | Non-coding transcript identified by NONCODE: Sense No Exonic                           |
| -2.54 | Plbd1    | Mus musculus phospholipase B domain containing 1 (Plbd1), mRNA.                        |
| -2.54 | ---      | Non-coding transcript identified by Luo, et al.                                        |
| -2.54 | ---      | Non-coding transcript identified by NONCODE: Sense No Exonic                           |
| -2.54 | ---      | Non-coding transcript identified by NONCODE: Linc                                      |
| -2.55 | Igkv4-63 | immunoglobulin kappa variable 4-63                                                     |
| -2.55 | ---      | Non-coding transcript identified by NONCODE: Sense No Exonic                           |
| -2.55 | ---      | Non-coding transcript identified by NONCODE: Sense No Exonic                           |
| -2.55 | ---      | Non-coding transcript identified by NONCODE: Sense No Exonic                           |
| -2.55 | ---      | Non-coding transcript identified by NONCODE: Sense No Exonic                           |
| -2.55 | ---      | Non-coding transcript identified by NONCODE: Sense No Exonic                           |
| -2.55 | ---      | Non-coding transcript identified by NONCODE: Linc                                      |
| -2.55 | ---      | Non-coding transcript identified by NONCODE: Sense No Exonic                           |
| -2.55 | ---      | Non-coding transcript identified by Luo, et al.                                        |
| -2.56 | ---      | Non-coding transcript identified by Luo, et al.                                        |
| -2.56 | ---      | Non-coding transcript identified by NONCODE: Sense No Exonic                           |

|       |          |                                                                                          |
|-------|----------|------------------------------------------------------------------------------------------|
| -2.56 | ---      | Non-coding transcript identified by NONCODE: Linc                                        |
| -2.56 | ---      | Non-coding transcript identified by NONCODE: Sense No Exonic                             |
| -2.56 | ---      | Non-coding transcript identified by NONCODE: Sense No Exonic                             |
| -2.57 | ---      | Non-coding transcript identified by NONCODE: Sense No Exonic                             |
| -2.57 | Ighv1-53 | immunoglobulin heavy variable 1-53                                                       |
| -2.57 | ---      | Non-coding transcript identified by Luo, et al.                                          |
| -2.57 | ---      | Non-coding transcript identified by NONCODE: Linc                                        |
| -2.57 | ---      | Non-coding transcript identified by NONCODE: Sense No Exonic                             |
| -2.58 | ---      | Non-coding transcript identified by NONCODE: Sense No Exonic                             |
| -2.58 | ---      | Non-coding transcript identified by NONCODE: Sense No Exonic                             |
| -2.58 | ---      | Non-coding transcript identified by NONCODE: Sense No Exonic                             |
| -2.58 | ---      | Non-coding transcript identified by NONCODE: Sense No Exonic                             |
| -2.58 | ---      | Non-coding transcript identified by NONCODE: Sense No Exonic                             |
| -2.58 | ---      | Non-coding transcript identified by NONCODE: Sense No Exonic                             |
| -2.58 | ---      | Non-coding transcript identified by NONCODE: Sense No Exonic                             |
| -2.58 | ---      | Non-coding transcript identified by NONCODE: Sense No Exonic                             |
| -2.58 | ---      | Non-coding transcript identified by NONCODE: Sense No Exonic                             |
| -2.59 | ---      | Non-coding transcript identified by NONCODE: Sense No Exonic                             |
| -2.59 | ---      | Non-coding transcript identified by NONCODE: Sense No Exonic                             |
| -2.59 | ---      | Non-coding transcript identified by NONCODE: Linc                                        |
| -2.59 | ---      | Non-coding transcript identified by NONCODE: Sense No Exonic                             |
| -2.59 | Mir6539  | Mus musculus microRNA 6539 (Mir6539), microRNA.                                          |
| -2.60 | ---      | Non-coding transcript identified by NONCODE: Sense No Exonic                             |
| -2.60 | ---      | Non-coding transcript identified by Luo, et al.                                          |
| -2.60 | ---      | Non-coding transcript identified by Luo, et al.                                          |
| -2.60 | ---      | Non-coding transcript identified by NONCODE: Linc                                        |
| -2.61 | ---      | Non-coding transcript identified by NONCODE: Antisense                                   |
| -2.62 | Gm9967   | predicted gene 9967 [gene_biotype:protein_coding transcript_biotype:protein_coding]      |
| -2.62 | ---      | Non-coding transcript identified by NONCODE: Sense No Exonic                             |
| -2.62 | ---      | Non-coding transcript identified by NONCODE: Sense No Exonic                             |
| -2.62 | Rnf141   | ring finger protein 141 [gene_biotype:protein_coding transcript_biotype:retained_intron] |
| -2.62 | ---      | Non-coding transcript identified by NONCODE: Antisense                                   |
| -2.62 | ---      | Non-coding transcript identified by NONCODE: Sense No Exonic                             |
| -2.62 | ---      | Mus musculus non-coding RNA, oocyte_clustered_small_RNA12766, complete sequence.         |
| -2.63 | ---      | Non-coding transcript identified by NONCODE: Sense No Exonic                             |
| -2.63 | ---      | Non-coding transcript identified by NONCODE: Sense No Exonic                             |
| -2.63 | ---      | Non-coding transcript identified by NONCODE: Sense No Exonic                             |
| -2.63 | ---      | Non-coding transcript identified by NONCODE: Sense No Exonic                             |
| -2.64 | ---      | Mus musculus non-coding RNA, oocyte_clustered_small_RNA6165, complete sequence.          |
| -2.64 | ---      | Non-coding transcript identified by NONCODE: Sense No Exonic                             |
| -2.65 | ---      | Non-coding transcript identified by NONCODE: Sense No Exonic                             |
| -2.65 | ---      | Non-coding transcript identified by NONCODE: Sense No Exonic                             |
| -2.65 | ---      | Non-coding transcript identified by NONCODE: Sense No Exonic                             |
| -2.65 | ---      | Non-coding transcript identified by NONCODE: Linc                                        |
| -2.65 | ---      | Non-coding transcript identified by NONCODE: Antisense                                   |
| -2.66 | ---      | Non-coding transcript identified by NONCODE: Sense No Exonic                             |
| -2.66 | ---      | Non-coding transcript identified by NONCODE: Sense No Exonic                             |
| -2.66 | ---      | Mus musculus non-coding RNA, oocyte_clustered_small_RNA5029, complete sequence.          |
| -2.66 | ---      | Mus musculus non-coding RNA, oocyte_clustered_small_RNA5028, complete sequence.          |
| -2.66 | ---      | Mus musculus non-coding RNA, oocyte_clustered_small_RNA5028, complete sequence.          |
| -2.66 | ---      | Mus musculus non-coding RNA, oocyte_piRNA949, complete sequence.                         |
| -2.66 | ---      | Non-coding transcript identified by NONCODE: Sense No Exonic                             |
| -2.67 | ---      | Non-coding transcript identified by NONCODE: Sense No Exonic                             |
| -2.67 | ---      | Non-coding transcript identified by Luo, et al.                                          |
| -2.67 | ---      | Non-coding transcript identified by NONCODE: Sense No Exonic                             |
| -2.67 | ---      | Non-coding transcript identified by NONCODE: Linc                                        |
| -2.67 | ---      | Non-coding transcript identified by Luo, et al.                                          |
| -2.67 | ---      | Non-coding transcript identified by NONCODE: Sense No Exonic                             |
| -2.68 | ---      | Non-coding transcript identified by Luo, et al.                                          |
| -2.68 | ---      | Non-coding transcript identified by NONCODE: Sense No Exonic                             |
| -2.68 | ---      | Non-coding transcript identified by NONCODE: Sense No Exonic                             |
| -2.68 | Gm13052  | predicted gene 13052 [gene_biotype:lincRNA transcript_biotype:lincRNA]                   |
| -2.68 | ---      | Non-coding transcript identified by NONCODE: Sense No Exonic                             |
| -2.68 | ---      | Non-coding transcript identified by NONCODE: Sense No Exonic                             |
| -2.69 | Mir493   | Mus musculus microRNA 493 (Mir493), microRNA.                                            |
| -2.69 | ---      | Non-coding transcript identified by NONCODE: Sense No Exonic                             |
| -2.69 | Gm23787  | predicted gene, 23787 [gene_biotype:snoRNA transcript_biotype:snoRNA]                    |
| -2.69 | ---      | Non-coding transcript identified by NONCODE: Sense No Exonic                             |
| -2.69 | Sik1     | Mus musculus salt inducible kinase 1 (Sik1), mRNA.                                       |
| -2.70 | ---      | Non-coding transcript identified by NONCODE: Sense No Exonic                             |
| -2.70 | ---      | Non-coding transcript identified by NONCODE: Sense No Exonic                             |
| -2.70 | ---      | Non-coding transcript identified by NONCODE: Sense No Exonic                             |
| -2.70 | ---      | Non-coding transcript identified by NONCODE: Sense No Exonic                             |
| -2.70 | ---      | Non-coding transcript identified by NONCODE: Sense No Exonic                             |
| -2.70 | ---      | Non-coding transcript identified by NONCODE: Sense No Exonic                             |
| -2.70 | ---      | Non-coding transcript identified by NONCODE: Sense No Exonic                             |
| -2.71 | ---      | Non-coding transcript identified by NONCODE: Sense No Exonic                             |
| -2.71 | ---      | Non-coding transcript identified by NONCODE: Sense No Exonic                             |
| -2.71 | ---      | Non-coding transcript identified by NONCODE: Linc                                        |

|       |               |                                                                                      |
|-------|---------------|--------------------------------------------------------------------------------------|
| -2.71 | Mir16-2       | Mus musculus microRNA 16-2 (Mir16-2), microRNA.                                      |
| -2.71 | ---           | Non-coding transcript identified by NONCODE: Sense No Exonic                         |
| -2.71 | Lat           | Mus musculus linker for activation of T cells (Lat), mRNA.                           |
| -2.72 | ---           | Non-coding transcript identified by NONCODE: Sense No Exonic                         |
| -2.72 | Tcrg-C3       | T cell receptor gamma, constant 3                                                    |
| -2.72 | ---           | Non-coding transcript identified by NONCODE: Sense No Exonic                         |
| -2.72 | ---           | Non-coding transcript identified by NONCODE: Linc                                    |
| -2.72 | ---           | Non-coding transcript identified by NONCODE: Linc                                    |
| -2.73 | ---           | Mus musculus cDNA clone MGC:27981 IMAGE:3596365, complete cds.                       |
| -2.73 | ---           | Non-coding transcript identified by NONCODE: Sense No Exonic                         |
| -2.73 | ---           | Non-coding transcript identified by NONCODE: Sense No Exonic                         |
| -2.73 | C530030P08Rik | RIKEN cDNA C530030P08 gene                                                           |
| -2.73 | ---           | Non-coding transcript identified by NONCODE: Sense No Exonic                         |
| -2.74 | ---           | Non-coding transcript identified by NONCODE: Sense No Exonic                         |
| -2.74 | ---           | Non-coding transcript identified by NONCODE: Sense No Exonic                         |
| -2.74 | ---           | Non-coding transcript identified by NONCODE: Sense No Exonic                         |
| -2.74 | ---           | Non-coding transcript identified by NONCODE: Sense No Exonic                         |
| -2.74 | Gm11084       | predicted gene 11084 [gene_biotype:protein_coding transcript_biotype:protein_coding] |
| -2.74 | Mir1932       | Mus musculus microRNA 1932 (Mir1932), microRNA.                                      |
| -2.75 | ---           | Non-coding transcript identified by NONCODE: Sense No Exonic                         |
| -2.75 | Igkv4-74      | immunoglobulin kappa variable 4-74                                                   |
| -2.75 | ---           | Non-coding transcript identified by NONCODE: Sense No Exonic                         |
| -2.76 | ---           | Non-coding transcript identified by NONCODE: Sense No Exonic                         |
| -2.77 | Gm27851       | predicted gene, 27851 [gene_biotype:snRNA transcript_biotype:snRNA]                  |
| -2.78 | Igkv5-48      | immunoglobulin kappa variable 5-48                                                   |
| -2.78 | ---           | Non-coding transcript identified by Luo, et al.                                      |
| -2.79 | Snora75       | Mus musculus small nucleolar RNA, H/ACA box 75 (Snora75), small nucleolar RNA.       |
| -2.79 | ---           | Non-coding transcript identified by NONCODE: Sense No Exonic                         |
| -2.79 | ---           | Non-coding transcript identified by NONCODE: Sense No Exonic                         |
| -2.80 | ---           | Non-coding transcript identified by NONCODE: Sense No Exonic                         |
| -2.80 | Mir344b       | Mus musculus microRNA 344b (Mir344b), microRNA.                                      |
| -2.82 | ---           | Non-coding transcript identified by NONCODE: Sense No Exonic                         |
| -2.82 | ---           | Non-coding transcript identified by Luo, et al.                                      |
| -2.82 | ---           | Non-coding transcript identified by NONCODE: Sense No Exonic                         |
| -2.82 | ---           | Non-coding transcript identified by NONCODE: Sense No Exonic                         |
| -2.82 | ---           | Mus musculus piRNA piR-118967, complete sequence.                                    |
| -2.83 | ---           | Non-coding transcript identified by NONCODE: Sense No Exonic                         |
| -2.83 | ---           | Non-coding transcript identified by NONCODE: Linc                                    |
| -2.84 | Gm24646       | predicted gene, 24646 [gene_biotype:snRNA transcript_biotype:snRNA]                  |
| -2.84 | ---           | Non-coding transcript identified by NONCODE: Sense No Exonic                         |
| -2.85 | Traj38        | T cell receptor alpha joining 38                                                     |
| -2.85 | ---           | Non-coding transcript identified by NONCODE: Sense No Exonic                         |
| -2.85 | ---           | Non-coding transcript identified by NONCODE: Sense No Exonic                         |
| -2.85 | Rbm4          | Mus musculus RNA binding motif protein 4 (Rbm4), transcript variant 5, mRNA.         |
| -2.86 | ---           | Non-coding transcript identified by NONCODE: Sense No Exonic                         |
| -2.86 | ---           | Non-coding transcript identified by NONCODE: Sense No Exonic                         |
| -2.86 | ---           | Non-coding transcript identified by NONCODE: Sense No Exonic                         |
| -2.86 | ---           | Non-coding transcript identified by NONCODE: Sense No Exonic                         |
| -2.86 | Gm25847       | predicted gene, 25847 [gene_biotype:miRNA transcript_biotype:miRNA]                  |
| -2.87 | ---           | Non-coding transcript identified by NONCODE: Antisense                               |
| -2.87 | ---           | Non-coding transcript identified by NONCODE: Sense No Exonic                         |
| -2.87 | ---           | Non-coding transcript identified by NONCODE: Sense No Exonic                         |
| -2.87 | ---           | Non-coding transcript identified by NONCODE: Sense No Exonic                         |
| -2.87 | ---           | Non-coding transcript identified by NONCODE: Sense No Exonic                         |
| -2.88 | ---           | Non-coding transcript identified by NONCODE: Sense No Exonic                         |
| -2.88 | ---           | Non-coding transcript identified by NONCODE: Sense No Exonic                         |
| -2.88 | ---           | Non-coding transcript identified by NONCODE: Sense No Exonic                         |
| -2.88 | ---           | Non-coding transcript identified by Luo, et al.                                      |
| -2.88 | ---           | Mus musculus non-coding RNA, oocyte_clustered_small_RNA8334, complete sequence.      |
| -2.89 | ---           | Non-coding transcript identified by NONCODE: Sense No Exonic                         |
| -2.90 | Mir3094       | Mus musculus microRNA 3094 (Mir3094), microRNA.                                      |
| -2.90 | ---           | Non-coding transcript identified by NONCODE: Sense No Exonic                         |
| -2.90 | ---           | Non-coding transcript identified by NONCODE: Sense No Exonic                         |
| -2.90 | ---           | Mus musculus non-coding RNA, oocyte_clustered_small_RNA7874, complete sequence.      |
| -2.91 | ---           | Non-coding transcript identified by NONCODE: Sense No Exonic                         |
| -2.91 | ---           | Non-coding transcript identified by NONCODE: Sense No Exonic                         |
| -2.92 | ---           | Non-coding transcript identified by NONCODE: Sense No Exonic                         |
| -2.92 | ---           | Non-coding transcript identified by NONCODE: Sense No Exonic                         |
| -2.92 | ---           | Non-coding transcript identified by NONCODE: Sense No Exonic                         |
| -2.93 | ---           | Non-coding transcript identified by NONCODE: Sense No Exonic                         |
| -2.93 | ---           | Non-coding transcript identified by NONCODE: Sense No Exonic                         |
| -2.93 | ---           | Non-coding transcript identified by NONCODE: Sense No Exonic                         |
| -2.93 | ---           | Non-coding transcript identified by NONCODE: Sense No Exonic                         |
| -2.94 | Gm25559       | predicted gene, 25559 [gene_biotype:miRNA transcript_biotype:miRNA]                  |
| -2.94 | ---           | Non-coding transcript identified by NONCODE: Sense No Exonic                         |
| -2.94 | ---           | Non-coding transcript identified by Luo, et al.                                      |
| -2.94 | Mir6994       | Mus musculus microRNA 6994 (Mir6994), microRNA.                                      |
| -2.95 | ---           | Non-coding transcript identified by NONCODE: Sense No Exonic                         |
| -2.95 | ---           | Non-coding transcript identified by NONCODE: Sense No Exonic                         |



|       |               |                                                                                                                                          |
|-------|---------------|------------------------------------------------------------------------------------------------------------------------------------------|
| -3.19 | ---           | Non-coding transcript identified by NONCODE: Sense No Exonic                                                                             |
| -3.19 | ---           | Non-coding transcript identified by NONCODE: Sense No Exonic                                                                             |
| -3.19 | ---           | Non-coding transcript identified by NONCODE: Sense No Exonic                                                                             |
| -3.20 | ---           | Non-coding transcript identified by NONCODE: Sense No Exonic                                                                             |
| -3.20 | ---           | Non-coding transcript identified by NONCODE: Sense No Exonic                                                                             |
| -3.20 | ---           | Non-coding transcript identified by NONCODE: Sense No Exonic                                                                             |
| -3.20 | ---           | Non-coding transcript identified by Luo, et al.                                                                                          |
| -3.21 | ---           | Mus musculus non-coding RNA, oocyte_clustered_small_RNA5081, complete sequence.                                                          |
| -3.21 | ---           | Mus musculus non-coding RNA, oocyte_clustered_small_RNA5081, complete sequence.                                                          |
| -3.21 | ---           | Mus musculus non-coding RNA, oocyte_clustered_small_RNA5081, complete sequence.                                                          |
| -3.21 | ---           | Mus musculus non-coding RNA, oocyte_clustered_small_RNA5081, complete sequence.                                                          |
| -3.21 | ---           | Mus musculus non-coding RNA, oocyte_clustered_small_RNA5081, complete sequence.                                                          |
| -3.21 | ---           | Mus musculus non-coding RNA, oocyte_clustered_small_RNA5081, complete sequence.                                                          |
| -3.21 | ---           | Mus musculus non-coding RNA, oocyte_clustered_small_RNA5078, complete sequence.                                                          |
| -3.21 | Ighd5-8       | immunoglobulin heavy diversity 5-8 [gene_biotype:IG_D_gene transcript_biotype:IG_D_gene]                                                 |
| -3.21 | ---           | Non-coding transcript identified by NONCODE: Sense No Exonic                                                                             |
| -3.22 | Gm24920       | predicted gene, 24920 [gene_biotype:snoRNA transcript_biotype:snoRNA]                                                                    |
| -3.23 | Mir431        | Mus musculus microRNA 431 (Mir431), microRNA.                                                                                            |
| -3.24 | F830001A07Rik | RIKEN cDNA F830001A07 gene                                                                                                               |
| -3.24 | ---           | Non-coding transcript identified by NONCODE: Sense No Exonic                                                                             |
| -3.26 | ---           | Non-coding transcript identified by NONCODE: Sense No Exonic                                                                             |
| -3.26 | Traj35        | T cell receptor alpha joining 35                                                                                                         |
| -3.27 | ---           | Non-coding transcript identified by NONCODE: Sense No Exonic                                                                             |
| -3.28 | ---           | Non-coding transcript identified by NONCODE: Sense No Exonic                                                                             |
| -3.30 | ---           | Non-coding transcript identified by NONCODE: Sense No Exonic                                                                             |
| -3.30 | ---           | Non-coding transcript identified by NONCODE: Sense No Exonic                                                                             |
| -3.30 | ---           | Non-coding transcript identified by NONCODE: Sense No Exonic                                                                             |
| -3.33 | ---           | Non-coding transcript identified by NONCODE: Sense No Exonic                                                                             |
| -3.33 | ---           | Non-coding transcript identified by NONCODE: Sense No Exonic                                                                             |
| -3.34 | Nr4a1         | Mus musculus nuclear receptor subfamily 4, group A, member 1 (Nr4a1), mRNA.                                                              |
| -3.34 | ---           | Mus musculus non-coding RNA, oocyte_piRNA775, complete sequence.                                                                         |
| -3.34 | ---           | Mus musculus non-coding RNA, oocyte_piRNA1772, complete sequence.                                                                        |
| -3.34 | Gm24507       | predicted gene, 24507 [gene_biotype:snoRNA transcript_biotype:snoRNA]                                                                    |
| -3.34 | Snord16a      | Mus musculus small nucleolar RNA, C/D box 16A (Snord16a), small nucleolar RNA.                                                           |
| -3.35 | ---           | Non-coding transcript identified by NONCODE: Sense No Exonic                                                                             |
| -3.35 | ---           | Non-coding transcript identified by NONCODE: Sense No Exonic                                                                             |
| -3.36 | ---           | Non-coding transcript identified by NONCODE: Sense No Exonic                                                                             |
| -3.36 | Gm22980       | predicted gene, 22980 [gene_biotype:snoRNA transcript_biotype:snoRNA]                                                                    |
| -3.37 | ---           | Non-coding transcript identified by NONCODE: Sense No Exonic                                                                             |
| -3.38 | ---           | Non-coding transcript identified by NONCODE: Sense No Exonic                                                                             |
| -3.39 | ---           | Non-coding transcript identified by NONCODE: Sense No Exonic                                                                             |
| -3.40 | ---           | Non-coding transcript identified by NONCODE: Sense No Exonic                                                                             |
| -3.40 | ---           | Non-coding transcript identified by NONCODE: Linc                                                                                        |
| -3.40 | ---           | Non-coding transcript identified by NONCODE: Linc                                                                                        |
| -3.41 | Gm19664       | PREDICTED: predicted gene, 19664 (Gm19664), miscRNA.                                                                                     |
| -3.41 | ---           | Non-coding transcript identified by NONCODE: Sense No Exonic                                                                             |
| -3.42 | ---           | Non-coding transcript identified by NONCODE: Sense No Exonic                                                                             |
| -3.42 | ---           | Non-coding transcript identified by NONCODE: Sense No Exonic                                                                             |
| -3.42 | ---           | Non-coding transcript identified by NONCODE: Sense No Exonic                                                                             |
| -3.42 | ---           | Non-coding transcript identified by NONCODE: Sense No Exonic                                                                             |
| -3.44 | ---           | Non-coding transcript identified by Luo, et al.                                                                                          |
| -3.44 | ---           | Non-coding transcript identified by Luo, et al.                                                                                          |
| -3.44 | Ighd5-7       | immunoglobulin heavy diversity 5-7 [gene_biotype:IG_D_gene transcript_biotype:IG_D_gene]                                                 |
| -3.44 | Ighd6-1       | immunoglobulin heavy diversity 6-1 [gene_biotype:IG_D_pseudogene transcript_biotype:IG_D_pseudogene]                                     |
| -3.45 | ---           | Non-coding transcript identified by NONCODE: Sense No Exonic                                                                             |
| -3.45 | ---           | Non-coding transcript identified by NONCODE: Sense No Exonic                                                                             |
| -3.45 | ---           | Non-coding transcript identified by NONCODE: Sense No Exonic                                                                             |
| -3.48 | ---           | Non-coding transcript identified by NONCODE: Sense No Exonic                                                                             |
| -3.51 | ---           | Non-coding transcript identified by NONCODE: Sense No Exonic                                                                             |
| -3.53 | ---           | Non-coding transcript identified by NONCODE: Sense No Exonic                                                                             |
| -3.53 | ---           | Non-coding transcript identified by NONCODE: Sense No Exonic                                                                             |
| -3.54 | Gm25506       | predicted gene, 25506 [gene_biotype:snoRNA transcript_biotype:snoRNA]                                                                    |
| -3.54 | ---           | Non-coding transcript identified by NONCODE: Sense No Exonic                                                                             |
| -3.55 | Bloc1s6os     | biogenesis of lysosomal organelles complex-1, subunit 6, pallidin, opposite strand [gene_biotype:antisense transcript_biotype:antisense] |
| -3.58 | ---           | Non-coding transcript identified by NONCODE: Sense No Exonic                                                                             |
| -3.60 | Gm25908       | predicted gene, 25908 [gene_biotype:rRNA transcript_biotype:rRNA]                                                                        |
| -3.60 | ---           | Non-coding transcript identified by NONCODE: Sense No Exonic                                                                             |
| -3.61 | ---           | Non-coding transcript identified by Luo, et al.                                                                                          |
| -3.61 | ---           | Non-coding transcript identified by NONCODE: Sense No Exonic                                                                             |
| -3.64 | Gm26216       | predicted gene, 26216 [gene_biotype:rRNA transcript_biotype:rRNA]                                                                        |
| -3.64 | Gm25323       | predicted gene, 25323 [gene_biotype:snRNA transcript_biotype:snRNA]                                                                      |
| -3.65 | Ighv1-12      | immunoglobulin heavy variable V1-12                                                                                                      |
| -3.65 | ---           | Non-coding transcript identified by NONCODE: Sense No Exonic                                                                             |
| -3.65 | Rnu73b        | Mus musculus U73B small nuclear RNA (Rnu73b), small nuclear RNA.                                                                         |

|       |          |                                                                                                  |
|-------|----------|--------------------------------------------------------------------------------------------------|
| -3.66 | Rac2     | Mus musculus RAS-related C3 botulinum substrate 2 (Rac2), mRNA.                                  |
| -3.66 | ---      | Non-coding transcript identified by NONCODE: Sense No Exonic                                     |
| -3.67 | ---      | Non-coding transcript identified by NONCODE: Sense No Exonic                                     |
| -3.68 | ---      | Non-coding transcript identified by NONCODE: Sense No Exonic                                     |
| -3.70 | Gm22192  | predicted gene, 22192 [gene_biotype:snoRNA transcript_biotype:snoRNA]                            |
| -3.70 | Gm25632  | predicted gene, 25632 [gene_biotype:snoRNA transcript_biotype:snoRNA]                            |
| -3.73 | Gm25483  | predicted gene, 25483 [gene_biotype:snoRNA transcript_biotype:snoRNA]                            |
| -3.75 | ---      | Non-coding transcript identified by NONCODE: Sense No Exonic                                     |
| -3.80 | Ighm     | immunoglobulin heavy constant mu                                                                 |
| -3.81 | ---      | Non-coding transcript identified by Luo, et al.                                                  |
| -3.82 | ---      | Non-coding transcript identified by NONCODE: Sense No Exonic                                     |
| -3.82 | ---      | Non-coding transcript identified by NONCODE: Sense No Exonic                                     |
| -3.83 | ---      | Non-coding transcript identified by NONCODE: Sense No Exonic                                     |
| -3.84 | ---      | Non-coding transcript identified by NONCODE: Sense No Exonic                                     |
| -3.84 | Mir7026  | Mus musculus microRNA 7026 (Mir7026), microRNA.                                                  |
| -3.88 | ---      | Non-coding transcript identified by NONCODE: Sense No Exonic                                     |
| -3.89 | ---      | Non-coding transcript identified by NONCODE: Sense No Exonic                                     |
| -3.89 | ---      | Non-coding transcript identified by NONCODE: Sense No Exonic                                     |
| -3.90 | Gm15153  | predicted gene 15153 [gene_biotype:processed_pseudogene transcript_biotype:processed_pseudogene] |
| -3.92 | ---      | The use of siRNA silencing in the prevention of metastasis.                                      |
| -3.95 | ---      | Non-coding transcript identified by NONCODE: Sense No Exonic                                     |
| -3.98 | Gm24876  | predicted gene, 24876 [gene_biotype:rRNA transcript_biotype:rRNA]                                |
| -4.00 | Gm23344  | predicted gene, 23344 [gene_biotype:snoRNA transcript_biotype:snoRNA]                            |
| -4.02 | ---      | Non-coding transcript identified by NONCODE: Sense No Exonic                                     |
| -4.02 | Gm25837  | predicted gene, 25837 [gene_biotype:miRNA transcript_biotype:miRNA]                              |
| -4.02 | Cd8b1    | Mus musculus CD8 antigen, beta chain 1 (Cd8b1), mRNA.                                            |
| -4.02 | Cldn8    | Mus musculus claudin 8 (Cldn8), mRNA.                                                            |
| -4.03 | ---      | Non-coding transcript identified by NONCODE: Sense No Exonic                                     |
| -4.05 | Gm22043  | predicted gene, 22043 [gene_biotype:snRNA transcript_biotype:snRNA]                              |
| -4.08 | Gm23557  | predicted gene, 23557 [gene_biotype:scaRNA transcript_biotype:scaRNA]                            |
| -4.11 | ---      | Mus musculus non-coding RNA, oocyte clustered small RNA151, complete sequence.                   |
| -4.11 | ---      | Mus musculus non-coding RNA, oocyte clustered small RNA151, complete sequence.                   |
| -4.11 | ---      | Mus musculus non-coding RNA, oocyte clustered small RNA153, complete sequence.                   |
| -4.11 | ---      | Mus musculus non-coding RNA, oocyte clustered small RNA151, complete sequence.                   |
| -4.12 | Dpt      | Mus musculus dermatopontin (Dpt), mRNA.                                                          |
| -4.12 | n-R5s40  | nuclear encoded rRNA 5S 40 [gene_biotype:rRNA transcript_biotype:rRNA]                           |
| -4.13 | Gm27781  | predicted gene, 27781 [gene_biotype:rRNA transcript_biotype:rRNA]                                |
| -4.14 | ---      | Non-coding transcript identified by NONCODE: Sense No Exonic                                     |
| -4.17 | ---      | Non-coding transcript identified by NONCODE: Sense No Exonic                                     |
| -4.17 | Gm13304  | predicted gene 13304 (Gm13304), mRNA.                                                            |
| -4.19 | Gm13304  | Mus musculus predicted gene 13304 (Gm13304), mRNA.                                               |
| -4.19 | Gm13304  | predicted gene 13304 (Gm13304), mRNA.                                                            |
| -4.19 | Gm13304  | predicted gene 13304 (Gm13304), mRNA.                                                            |
| -4.19 | ---      | Non-coding transcript identified by NONCODE: Sense No Exonic                                     |
| -4.19 | ---      | Non-coding transcript identified by NONCODE: Sense No Exonic                                     |
| -4.21 | ---      | Non-coding transcript identified by NONCODE: Sense No Exonic                                     |
| -4.23 | Gm13304  | predicted gene 13304 (Gm13304), mRNA.                                                            |
| -4.23 | Gm13304  | predicted gene 13304 (Gm13304), mRNA.                                                            |
| -4.23 | Gm13304  | predicted gene 13304 (Gm13304), mRNA.                                                            |
| -4.24 | Cd3d     | Mus musculus CD3 antigen, delta polypeptide (Cd3d), mRNA.                                        |
| -4.25 | Ighv1-12 | immunoglobulin heavy variable V1-12 [gene_biotype:IG_V_gene transcript_biotype:IG_V_gene]        |
| -4.26 | ---      | Non-coding transcript identified by NONCODE: Sense No Exonic                                     |
| -4.28 | ---      | Mus musculus non-coding RNA, oocyte clustered small RNA5057, complete sequence.                  |
| -4.30 | ---      | Non-coding transcript identified by NONCODE: Sense No Exonic                                     |
| -4.31 | ---      | Non-coding transcript identified by NONCODE: Sense No Exonic                                     |
| -4.32 | ---      | Mus musculus non-coding RNA, oocyte clustered small RNA2869, complete sequence.                  |
| -4.36 | ---      | Non-coding transcript identified by NONCODE: Sense No Exonic                                     |
| -4.48 | ---      | Non-coding transcript identified by NONCODE: Sense No Exonic                                     |
| -4.59 | ---      | Non-coding transcript identified by Luo, et al.                                                  |
| -4.60 | Igkv4-54 | immunoglobulin kappa chain variable 4-54                                                         |
| -4.63 | C3       | Mus musculus complement component 3 (C3), mRNA.                                                  |
| -4.65 | ---      | Non-coding transcript identified by NONCODE: Linc                                                |
| -4.78 | Gm23183  | predicted gene, 23183                                                                            |
| -4.87 | Gm25635  | predicted gene, 25635 [gene_biotype:snoRNA transcript_biotype:snoRNA]                            |
| -4.89 | ---      | Non-coding transcript identified by NONCODE: Sense No Exonic                                     |
| -5.12 | ---      | Non-coding transcript identified by NONCODE: Linc                                                |
| -5.18 | ---      | Non-coding transcript identified by NONCODE: Sense No Exonic                                     |
| -5.18 | ---      | Non-coding transcript identified by NONCODE: Sense No Exonic                                     |
| -5.30 | Mir200c  | Mus musculus microRNA 200c (Mir200c), microRNA.                                                  |
| -5.31 | ---      | Non-coding transcript identified by NONCODE: Linc                                                |
| -5.44 | ---      | Non-coding transcript identified by NONCODE: Sense No Exonic                                     |
| -5.48 | Cxcl13   | Mus musculus chemokine (C-X-C motif) ligand 13 (Cxcl13), mRNA.                                   |
| -5.48 | ---      | Non-coding transcript identified by NONCODE: Sense No Exonic                                     |
| -5.54 | ---      | Non-coding transcript identified by NONCODE: Sense No Exonic                                     |
| -5.64 | ---      | Non-coding transcript identified by NONCODE: Sense No Exonic                                     |
| -6.01 | Gm25854  | predicted gene, 25854 [gene_biotype:snoRNA transcript_biotype:snoRNA]                            |



|        |          |                                                                                       |
|--------|----------|---------------------------------------------------------------------------------------|
| -6.26  | Mir6933  | Mus musculus microRNA 6933 (Mir6933), microRNA.                                       |
| -6.40  | ---      | Non-coding transcript identified by NONCODE: Sense No Exonic                          |
| -6.43  | Gm1987   | predicted gene 1987 (Gm1987), mRNA.                                                   |
| -6.61  | Gm22888  | predicted gene, 22888 [gene_biotype:snoRNA transcript_biotype:snoRNA]                 |
| -6.69  | ---      | Non-coding transcript identified by NONCODE: Sense No Exonic                          |
| -6.76  | DQ267102 | Mus musculus snoRNA DQ267102 (DQ267102), small nucleolar RNA.                         |
| -6.96  | Gm25776  | predicted gene, 25776 [gene_biotype:snoRNA transcript_biotype:snoRNA]                 |
| -7.23  | ---      | Non-coding transcript identified by NONCODE: Sense No Exonic                          |
| -7.80  | Mir325   | Mus musculus microRNA 325 (Mir325), microRNA.                                         |
| -8.43  | Gm24629  | predicted gene, 24629                                                                 |
| -8.51  | Gm1987   | Mus musculus predicted gene 1987 (Gm1987), mRNA.                                      |
| -8.57  | ---      | Non-coding transcript identified by NONCODE: Sense No Exonic                          |
| -8.78  | n-R5s80  | nuclear encoded rRNA 5S 80 [gene_biotype:rRNA transcript_biotype:rRNA]                |
| -11.04 | Mir669b  | Mus musculus microRNA 669b (Mir669b), microRNA.                                       |
| -12.00 | ---      | Non-coding transcript identified by NONCODE: Linc                                     |
| -12.54 | Mir7660  | microRNA 7660 [gene_biotype:miRNA transcript_biotype:miRNA]                           |
| -12.54 | Mir7660  | Mus musculus microRNA 7660 (Mir7660), microRNA.                                       |
| -16.63 | Gm17482  | predicted gene, 17482 [gene_biotype:protein_coding transcript_biotype:protein_coding] |
| -18.96 | ---      | Non-coding transcript identified by NONCODE: Sense No Exonic                          |
| -26.67 | Gif      | Mus musculus gastric intrinsic factor (Gif), mRNA.                                    |
