# Supplementary material
Source: publisher figshare collection journal article supplement (https://diabetesjournals.figshare.com/articles/dataset/_/13103045)
Supplement: Supplementary file 3 [file 1]

Supplementary Table 1. List of Primers used for qRT-PCR.

| <b>Gene (Mouse)</b> | <b>Forward (5' --&gt; 3')</b> | <b>Reverse (5' --&gt; 3')</b>       |
|---------------------|-------------------------------|-------------------------------------|
| <i>Abcc8</i>        | TGA GCA TTG GAA GAC CCT CAT   | CAG CAC CGA AGA TAA GTT GTC A       |
| <i>Actin</i>        | AAG TAC CCC ATT GAA CAC GG    | ATC ACA ATG CCA GTG GTA CG          |
| <i>Apoa1</i>        | CTC CGG GGA GGT CAC CCA C     | CAG TTT TCC AGG AGA TTC AGG TTC AGC |
| <i>Birc2</i>        | TGT GGC CTG ATG TTG GAT AAC   | GGT GAC GAA TGT GCA AAT CTA CT      |
| <i>Bmal1</i>        | TCA AGA CGA CAT AGG ACA CCT   | GGA CAT TGG CTA AAA CAA CAG TG      |
| <i>Cpe</i>          | GCT CAG GTA ATT GAA GTC TT    | TAC TGC TCA CGA ATA CAG TT          |
| <i>Cry1</i>         | GCT ATG CTC CTG GAG AGA ACG T | TGT CCC CGT GAG CAT AGT GTA A       |
| <i>Ero1b</i>        | ACC CTG AGC TTC CTC TCA AGT   | AAA GGA CAT GGT CGT TTC AGA TT      |
| <i>Fabp1</i>        | AGG CAA TAG GTC TGC CCG AGG   | GCC CAA TGT CAT GGT ATT GGT GAT T   |
| <i>Gadd45b</i>      | GAT GAA TGT GGA CCC CGA CA    | TGG GTC TCA GCG TTC CTC TA          |
| <i>GAPDH</i>        | AGG TCG GTG TGA ACG GAT TTG   | TGT AGA CCA TGT AGT TGA GGT CA      |
| <i>Glp1r</i>        | CCA CGG TGT CCC TCT CAG A     | ACT GCC GCC GGT ATT CTC T           |
| <i>JunB</i>         | TTT TCG GGT CAG GGA TCA GAC   | CGT GGT TCA TCT TGT GCA GG          |
| <i>Nfkbia</i>       | ACG AGG AGT ACG AGC AAA TGG   | AGT CTC GGA GCT CAG GAT CA          |
| <i>Nr1D1</i>        | TGA ACG CAG GAG GTG TGA TTG   | GAG GAC TGG AAG CTA TTC TCA GA      |
| <i>Per2</i>         | ATG CTC GCC ATC CAC AAG A     | GCG GAA TCG AAT GGG AGA AT          |
| <i>Ripk2</i>        | CAC CCG AAG GAG GAA CAA TCA   | GCA AAG GAT TGG TGA CCT CT          |
