# Supplementary material
Source: publisher figshare collection journal article supplement (https://diabetesjournals.figshare.com/articles/dataset/_/13103045)
Supplement: Supplementary file 4 [file 1]

## Supplementary Table 2

## Differential islet gene expression at ZT 4 in Bmal1OV (HFD) vs. Control (HFD)

| Fold change vs. Control | GeneSymbol | mRNA_Description                                                                                              |
|-------------------------|------------|---------------------------------------------------------------------------------------------------------------|
| 355.11                  | Fabp1      | Mus musculus fatty acid binding protein 1, liver (Fabp1), mRNA.                                               |
| 176.76                  | Gm17482    | predicted gene, 17482 [gene_biotype:protein_coding transcript_biotype:protein_coding]                         |
| 167.94                  | Gm25357    | predicted gene, 25357 [gene_biotype:snoRNA transcript_biotype:snoRNA]                                         |
| 121.99                  | Fabp2      | Mus musculus fatty acid binding protein 2, intestinal (Fabp2), mRNA.                                          |
| 68.62                   | Arntl      | Mus musculus aryl hydrocarbon receptor nuclear translocator-like (Arntl), transcript variant 2, mRNA.         |
| 48.98                   | Alpi       | Mus musculus alkaline phosphatase, intestinal (Alpi), mRNA.                                                   |
| 41.12                   | ---        | Non-coding transcript identified by NONCODE: Sense No Exonic                                                  |
| 39.26                   | Gm24112    | predicted gene, 24112 [gene_biotype:miRNA transcript_biotype:miRNA]                                           |
| 35.36                   | Gm25931    | predicted gene, 25931 [gene_biotype:miRNA transcript_biotype:miRNA]                                           |
| 30.46                   | Mir669c    | Mus musculus microRNA 669c (Mir669c), microRNA.                                                               |
| 29.62                   | ---        | Non-coding transcript identified by NONCODE: Sense No Exonic                                                  |
| 27.52                   | Gm11096    | predicted gene 11096 [gene_biotype:protein_coding transcript_biotype:protein_coding]                          |
| 25.04                   | Mgam       | Mus musculus maltase-glucoamylase (Mgam), mRNA.                                                               |
| 21.67                   | ---        | Mus musculus non-coding RNA, oocyte_piRNA3120, complete sequence.                                             |
| 20.09                   | Sprr2a3    | small proline-rich protein 2A3 [gene_biotype:protein_coding transcript_biotype:protein_coding]                |
| 19.79                   | Sis        | Mus musculus sucrase isomaltase (alpha-glucosidase) (Sis), mRNA.                                              |
| 18.37                   | ---        | Mus musculus non-coding RNA, oocyte clustered_small RNA5057, complete sequence.                               |
| 18.27                   | Gm17651    | predicted gene, 17651 [gene_biotype:protein_coding transcript_biotype:protein_coding]                         |
| 17.16                   | Gm24608    | predicted gene, 24608 [gene_biotype:snoRNA transcript_biotype:snoRNA]                                         |
| 15.94                   | Mir544     | microRNA 544                                                                                                  |
| 15.31                   | ---        | Non-coding transcript identified by NONCODE: Sense No Exonic                                                  |
| 14.91                   | ---        | Mus musculus cDNA, clone:Y1G0106M07, strand:plus, reference:ENSEMBL:Mouse-Transcript-ENST:ENSMUST00000033585  |
| 14.79                   | Mir5123    | Mus musculus microRNA 5123 (Mir5123), microRNA.                                                               |
| 14.72                   | ---        | Non-coding transcript identified by Luo, et al.                                                               |
| 14.52                   | Akp3       | Mus musculus alkaline phosphatase 3, intestine, not Mn requiring (Akp3), mRNA.                                |
| 13.56                   | ---        | Non-coding transcript identified by NONCODE: Sense No Exonic                                                  |
| 12.60                   | ---        | Mus musculus non-coding RNA, oocyte clustered_small RNA4337, complete sequence.                               |
| 12.60                   | ---        | Mus musculus non-coding RNA, oocyte clustered_small RNA4337, complete sequence.                               |
| 12.60                   | ---        | Mus musculus non-coding RNA, oocyte_piRNA3120, complete sequence.                                             |
| 12.60                   | ---        | Mus musculus non-coding RNA, oocyte clustered_small RNA4337, complete sequence.                               |
| 11.95                   | ---        | Mus musculus cDNA, clone:Y2G0139K17, strand:minus, reference:ENSEMBL:Mouse-Transcript-ENST:ENSMUST00000027232 |
| 11.58                   | Muc3       | mucin 3, intestinal                                                                                           |
| 11.41                   | DQ267102   | Mus musculus snoRNA DQ267102 (DQ267102), small nucleolar RNA.                                                 |
| 11.39                   | Gm22205    | predicted gene, 22205 [gene_biotype:snoRNA transcript_biotype:snoRNA]                                         |
| 11.10                   | Gm20430    | predicted gene 20430 [gene_biotype:processed_pseudogene transcript_biotype:processed_pseudogene]              |
| 10.84                   | ---        | Non-coding transcript identified by Luo, et al.                                                               |
| 10.52                   | ---        | Mus musculus cDNA, clone:Y0G0143A17, strand:unspecified.                                                      |
| 10.34                   | ---        | Mus musculus non-coding RNA, oocyte_piRNA3120, complete sequence.                                             |
| 10.26                   | ---        | Non-coding transcript identified by NONCODE: Sense No Exonic                                                  |
| 10.21                   | ---        | Non-coding transcript identified by Luo, et al.                                                               |
| 10.21                   | ---        | Non-coding transcript identified by Luo, et al.                                                               |
| 10.19                   | ---        | Non-coding transcript identified by NONCODE: Sense No Exonic                                                  |
| 10.05                   | ---        | Mus musculus cDNA, clone:Y2G0139K17, strand:minus, reference:ENSEMBL:Mouse-Transcript-ENST:ENSMUST00000027232 |
| 9.71                    | Gm24646    | predicted gene, 24646 [gene_biotype:snRNA transcript_biotype:snRNA]                                           |
| 9.65                    | Aldob      | Mus musculus aldolase B, fructose-bisphosphate (Aldob), mRNA.                                                 |
| 8.73                    | Snord104   | Mus musculus small nucleolar RNA, C/D box 104 (Snord104), small nucleolar RNA.                                |
| 8.37                    | Gm15151    | predicted gene 15151 [gene_biotype:processed_pseudogene transcript_biotype:processed_pseudogene]              |
| 8.21                    | Mir3471-1  | Mus musculus microRNA 3471-1 (Mir3471-1), microRNA.                                                           |
| 8.18                    | ---        | Non-coding transcript identified by NONCODE: Sense No Exonic                                                  |
| 8.18                    | Gm19579    | PREDICTED: predicted gene, 19579 (Gm19579), miscRNA.                                                          |
| 8.04                    | ---        | Non-coding transcript identified by NONCODE: Sense No Exonic                                                  |
| 7.94                    | ---        | Non-coding transcript identified by Luo, et al.                                                               |
| 7.88                    | Gm23726    | predicted gene, 23726 [gene_biotype:miRNA transcript_biotype:miRNA]                                           |
| 7.85                    | ---        | Non-coding transcript identified by NONCODE: Sense No Exonic                                                  |
| 7.76                    | ---        | Non-coding transcript identified by Luo, et al.                                                               |
| 7.68                    | ---        | Non-coding transcript identified by NONCODE: Sense No Exonic                                                  |
| 7.59                    | Ighm       | immunoglobulin heavy constant mu                                                                              |
| 7.50                    | Cyp3a13    | Mus musculus cytochrome P450, family 3, subfamily a, polypeptide 13 (Cyp3a13), mRNA.                          |
| 7.44                    | Ccnd2      | Mus musculus cyclin D2 (Ccnd2), mRNA.                                                                         |
| 7.43                    | Gm3054     | predicted gene 3054 [gene_biotype:lincRNA transcript_biotype:lincRNA]                                         |
| 7.24                    | Ighv1-12   | immunoglobulin heavy variable V1-12 [gene_biotype:IG_V_gene transcript_biotype:IG_V_gene]                     |
| 7.07                    | ---        | Mus musculus non-coding RNA, oocyte clustered_small RNA4377, complete sequence.                               |
| 7.05                    | ---        | Non-coding transcript identified by Luo, et al.                                                               |
| 7.00                    | Mir153     | Mus musculus microRNA 153 (Mir153), microRNA.                                                                 |
| 6.98                    | Tm4sf20    | Mus musculus transmembrane 4 L six family member 20 (Tm4sf20), mRNA.                                          |
| 6.91                    | ---        | Non-coding transcript identified by NONCODE: Sense No Exonic                                                  |
| 6.86                    | Resp18     | Mus musculus regulated endocrine-specific protein 18 (Resp18), mRNA.                                          |
| 6.74                    | Enpp3      | Mus musculus ectonucleotide pyrophosphatase/phosphodiesterase 3 (Enpp3), mRNA.                                |
| 6.71                    | ---        | Non-coding transcript identified by NONCODE: Sense No Exonic                                                  |
| 6.69                    | Clec2h     | Mus musculus C-type lectin domain family 2, member h (Clec2h), mRNA.                                          |
| 6.60                    | Gm12537    | predicted gene 12537 [gene_biotype:processed_pseudogene transcript_biotype:processed_pseudogene]              |
| 6.57                    | Cpe        | Mus musculus carboxypeptidase E (Cpe), mRNA.                                                                  |
| 6.48                    | ---        | Non-coding transcript identified by NONCODE: Linc                                                             |

|      |         |                                                                                                                          |
|------|---------|--------------------------------------------------------------------------------------------------------------------------|
| 6.39 | ---     | Non-coding transcript identified by NONCODE: Linc                                                                        |
| 6.38 | Gm14539 | predicted gene 14539                                                                                                     |
| 6.34 | Gm22132 | predicted gene, 22132 [gene_biotype:miRNA transcript_biotype:miRNA]                                                      |
| 6.33 | Gm24307 | predicted gene, 24307 [gene_biotype:miRNA transcript_biotype:miRNA]                                                      |
| 6.28 | Gm26463 | predicted gene, 26463 [gene_biotype:miRNA transcript_biotype:miRNA]                                                      |
| 6.28 | Gm24975 | predicted gene, 24975 [gene_biotype:miRNA transcript_biotype:miRNA]                                                      |
| 6.28 | Gm25100 | predicted gene, 25100 [gene_biotype:miRNA transcript_biotype:miRNA]                                                      |
| 6.28 | Gm28019 | predicted gene, 28019 [gene_biotype:miRNA transcript_biotype:miRNA]                                                      |
| 6.28 | ---     | ncrna:novel scaffold:GRCm38:GL456385.1:31243:31343:1 gene:ENSMUSG00000095434 gene_biotype:miRNA transcript_biotype:miRNA |
| 6.26 | ---     | ncrna:novel scaffold:GRCm38:GL456385.1:32719:32818:1 gene:ENSMUSG00000094431 gene_biotype:miRNA transcript_biotype:miRNA |
| 6.26 | Gm22463 | predicted gene, 22463 [gene_biotype:miRNA transcript_biotype:miRNA]                                                      |
| 6.26 | Gm25972 | predicted gene, 25972 [gene_biotype:miRNA transcript_biotype:miRNA]                                                      |
| 6.26 | Gm22547 | predicted gene, 22547 [gene_biotype:miRNA transcript_biotype:miRNA]                                                      |
| 6.26 | Gm23976 | predicted gene, 23976 [gene_biotype:miRNA transcript_biotype:miRNA]                                                      |
| 6.26 | Gm26386 | predicted gene, 26386 [gene_biotype:miRNA transcript_biotype:miRNA]                                                      |
| 6.26 | Gm25458 | predicted gene, 25458 [gene_biotype:miRNA transcript_biotype:miRNA]                                                      |
| 6.26 | Gm23292 | predicted gene, 23292 [gene_biotype:miRNA transcript_biotype:miRNA]                                                      |
| 6.26 | Gm22414 | predicted gene, 22414 [gene_biotype:miRNA transcript_biotype:miRNA]                                                      |
| 6.26 | Gm23646 | predicted gene, 23646 [gene_biotype:miRNA transcript_biotype:miRNA]                                                      |
| 6.26 | Gm22825 | predicted gene, 22825 [gene_biotype:miRNA transcript_biotype:miRNA]                                                      |
| 6.26 | Gm26241 | predicted gene, 26241 [gene_biotype:miRNA transcript_biotype:miRNA]                                                      |
| 6.26 | Gm24973 | predicted gene, 24973 [gene_biotype:miRNA transcript_biotype:miRNA]                                                      |
| 6.26 | Gm22913 | predicted gene, 22913 [gene_biotype:miRNA transcript_biotype:miRNA]                                                      |
| 6.26 | Gm25084 | predicted gene, 25084 [gene_biotype:miRNA transcript_biotype:miRNA]                                                      |
| 6.26 | Gm23282 | predicted gene, 23282 [gene_biotype:miRNA transcript_biotype:miRNA]                                                      |
| 6.26 | Gm24302 | predicted gene, 24302 [gene_biotype:miRNA transcript_biotype:miRNA]                                                      |
| 6.26 | Gm24643 | predicted gene, 24643 [gene_biotype:miRNA transcript_biotype:miRNA]                                                      |
| 6.26 | Gm26235 | predicted gene, 26235 [gene_biotype:miRNA transcript_biotype:miRNA]                                                      |
| 6.25 | Gm11940 | predicted gene 11940 [gene_biotype:antisense transcript_biotype:antisense]                                               |
| 6.20 | Gm5559  | predicted gene 5559                                                                                                      |
| 6.19 | ---     | Non-coding transcript identified by NONCODE: Linc                                                                        |
| 6.15 | Gm24598 | predicted gene, 24598 [gene_biotype:snoRNA transcript_biotype:snoRNA]                                                    |
| 6.15 | ---     | Non-coding transcript identified by NONCODE: Sense No Exonic                                                             |
| 6.14 | ---     | Non-coding transcript identified by NONCODE: Linc                                                                        |
| 6.10 | ---     | Non-coding transcript identified by NONCODE: Sense No Exonic                                                             |
| 6.08 | Gm10566 | predicted gene 10566 [gene_biotype:processed_pseudogene transcript_biotype:processed_pseudogene]                         |
| 6.06 | Gm23189 | predicted gene, 23189 [gene_biotype:miRNA transcript_biotype:miRNA]                                                      |
| 6.06 | Gm25708 | predicted gene, 25708 [gene_biotype:miRNA transcript_biotype:miRNA]                                                      |
| 6.06 | Gm25959 | predicted gene, 25959 [gene_biotype:miRNA transcript_biotype:miRNA]                                                      |
| 6.06 | Gm24332 | predicted gene, 24332 [gene_biotype:miRNA transcript_biotype:miRNA]                                                      |
| 6.06 | Gm23802 | predicted gene, 23802 [gene_biotype:miRNA transcript_biotype:miRNA]                                                      |
| 6.06 | Gm22903 | predicted gene, 22903 [gene_biotype:miRNA transcript_biotype:miRNA]                                                      |
| 6.06 | Gm25571 | predicted gene, 25571 [gene_biotype:miRNA transcript_biotype:miRNA]                                                      |
| 6.06 | Gm23049 | predicted gene, 23049 [gene_biotype:miRNA transcript_biotype:miRNA]                                                      |
| 6.06 | Gm24370 | predicted gene, 24370 [gene_biotype:miRNA transcript_biotype:miRNA]                                                      |
| 6.06 | Gm24159 | predicted gene, 24159 [gene_biotype:miRNA transcript_biotype:miRNA]                                                      |
| 6.06 | Gm25299 | predicted gene, 25299 [gene_biotype:miRNA transcript_biotype:miRNA]                                                      |
| 6.06 | Gm23798 | predicted gene, 23798 [gene_biotype:miRNA transcript_biotype:miRNA]                                                      |
| 6.06 | Gm25070 | predicted gene, 25070 [gene_biotype:miRNA transcript_biotype:miRNA]                                                      |
| 6.06 | Gm22475 | predicted gene, 22475 [gene_biotype:miRNA transcript_biotype:miRNA]                                                      |
| 6.06 | Gm23400 | predicted gene, 23400 [gene_biotype:miRNA transcript_biotype:miRNA]                                                      |
| 6.02 | ---     | Non-coding transcript identified by NONCODE: Sense No Exonic                                                             |
| 5.98 | Chga    | Mus musculus chromogranin A (Chga), mRNA.                                                                                |
| 5.95 | Gm25736 | predicted gene, 25736 [gene_biotype:miRNA transcript_biotype:miRNA]                                                      |
| 5.94 | ---     | Non-coding transcript identified by Luo, et al.                                                                          |
| 5.93 | Gm4853  | predicted pseudogene 4853                                                                                                |
| 5.93 | Gm25042 | predicted gene, 25042 [gene_biotype:miRNA transcript_biotype:miRNA]                                                      |
| 5.91 | Gm27440 | predicted gene, 27440 [gene_biotype:miRNA transcript_biotype:miRNA]                                                      |
| 5.90 | Gm13292 | predicted gene 13292                                                                                                     |
| 5.90 | Gm12671 | predicted gene 12671 [gene_biotype:processed_pseudogene transcript_biotype:processed_pseudogene]                         |
| 5.88 | ---     | Mus musculus piRNA piR-113971, complete sequence.                                                                        |
| 5.87 | ---     | Non-coding transcript identified by NONCODE: Linc                                                                        |
| 5.76 | Gm23801 | predicted gene, 23801 [gene_biotype:miRNA transcript_biotype:miRNA]                                                      |
| 5.76 | Gm24485 | predicted gene, 24485 [gene_biotype:miRNA transcript_biotype:miRNA]                                                      |
| 5.76 | Gm24331 | predicted gene, 24331 [gene_biotype:miRNA transcript_biotype:miRNA]                                                      |
| 5.73 | Gm19984 | PREDICTED: predicted gene, 19984 (Gm19984), miscRNA.                                                                     |
| 5.71 | ---     | Non-coding transcript identified by Luo, et al.                                                                          |
| 5.68 | Gm2606  | predicted pseudogene 2606 [gene_biotype:processed_pseudogene transcript_biotype:processed_pseudogene]                    |
| 5.64 | Gm10359 | predicted gene 10359 [gene_biotype:processed_pseudogene transcript_biotype:processed_pseudogene]                         |
| 5.57 | Gm14760 | predicted gene 14760                                                                                                     |
| 5.56 | ---     | Non-coding transcript identified by NONCODE: Sense No Exonic                                                             |
| 5.53 | Gpr158  | Mus musculus G protein-coupled receptor 158 (Gpr158), mRNA.                                                              |
| 5.52 | ---     | Mus musculus non-coding RNA, oocyte_clustered_small_RNA4554, complete sequence.                                          |
| 5.48 | Gm25355 | predicted gene, 25355 [gene_biotype:miRNA transcript_biotype:miRNA]                                                      |
| 5.48 | Gm23064 | predicted gene, 23064 [gene_biotype:miRNA transcript_biotype:miRNA]                                                      |
| 5.48 | Gm5138  | predicted gene 5138 [gene_biotype:processed_pseudogene transcript_biotype:processed_pseudogene]                          |
| 5.45 | Gm22616 | predicted gene, 22616 [gene_biotype:miRNA transcript_biotype:miRNA]                                                      |

|      |              |                                                                                                                                           |
|------|--------------|-------------------------------------------------------------------------------------------------------------------------------------------|
| 5.43 | ---          | Mus musculus early transposon ETn mRNA, 3' end region, clone:L3-2.                                                                        |
| 5.39 | Gm24894      | predicted gene, 24894 [gene_biotype:snoRNA transcript_biotype:snoRNA]                                                                     |
| 5.39 | ---          | Non-coding transcript identified by NONCODE: Linc                                                                                         |
| 5.38 | Gm26475      | predicted gene, 26475 [gene_biotype:miRNA transcript_biotype:miRNA]                                                                       |
| 5.35 | Gm23442      | predicted gene, 23442 [gene_biotype:snoRNA transcript_biotype:snoRNA]                                                                     |
| 5.34 | ---          | Non-coding transcript identified by NONCODE: Linc                                                                                         |
| 5.27 | Gm22992      | predicted gene, 22992 [gene_biotype:miRNA transcript_biotype:miRNA]                                                                       |
| 5.27 | Gm24092      | predicted gene, 24092 [gene_biotype:miRNA transcript_biotype:miRNA]                                                                       |
| 5.27 | Gm25123      | predicted gene, 25123 [gene_biotype:miRNA transcript_biotype:miRNA]                                                                       |
| 5.27 | Gm22103      | predicted gene, 22103 [gene_biotype:miRNA transcript_biotype:miRNA]                                                                       |
| 5.27 | Gm25892      | predicted gene, 25892 [gene_biotype:miRNA transcript_biotype:miRNA]                                                                       |
| 5.27 | Gm23620      | predicted gene, 23620 [gene_biotype:miRNA transcript_biotype:miRNA]                                                                       |
| 5.27 | Gm25353      | predicted gene, 25353 [gene_biotype:miRNA transcript_biotype:miRNA]                                                                       |
| 5.26 | LOC100862370 | PREDICTED: uncharacterized LOC100862370 (LOC100862370), miscRNA.                                                                          |
| 5.25 | Gm23550      | predicted gene, 23550 [gene_biotype:miRNA transcript_biotype:miRNA]                                                                       |
| 5.22 | Gm10576      | predicted gene 10576                                                                                                                      |
| 5.21 | Gm7336       | predicted gene 7336 [gene_biotype:processed_pseudogene transcript_biotype:processed_pseudogene]                                           |
| 5.19 | ---          | Non-coding transcript identified by NONCODE: Sense No Exonic                                                                              |
| 5.14 | Gm15536      | predicted gene 15536 [gene_biotype:processed_pseudogene transcript_biotype:processed_pseudogene]                                          |
| 5.14 | ---          | Non-coding transcript identified by NONCODE: Sense No Exonic                                                                              |
| 5.13 | ---          | Non-coding transcript identified by Luo, et al.                                                                                           |
| 5.12 | ---          | Non-coding transcript identified by NONCODE: Sense No Exonic                                                                              |
| 5.11 | Gm4609       | predicted gene 4609 [gene_biotype:processed_pseudogene transcript_biotype:processed_pseudogene]                                           |
| 5.11 | Gm27459      | predicted gene, 27459 [gene_biotype:miRNA transcript_biotype:miRNA]                                                                       |
| 5.11 | Cdh17        | Mus musculus cadherin 17 (Cdh17), mRNA.                                                                                                   |
| 5.09 | ---          | Non-coding transcript identified by NONCODE: Sense No Exonic                                                                              |
| 5.08 | ---          | Mus musculus non-coding RNA, oocyte_clustered_small_RNA2880, complete sequence.                                                           |
| 5.03 | ---          | Non-coding transcript identified by NONCODE: Linc                                                                                         |
| 4.99 | ---          | Non-coding transcript identified by NONCODE: Sense No Exonic                                                                              |
| 4.95 | Gm25872      | predicted gene, 25872 [gene_biotype:miRNA transcript_biotype:miRNA]                                                                       |
| 4.94 | ---          | Non-coding transcript identified by Luo, et al.                                                                                           |
| 4.93 | Gm27910      | predicted gene, 27910 [gene_biotype:miRNA transcript_biotype:miRNA]                                                                       |
| 4.92 | ---          | Non-coding transcript identified by Luo, et al.                                                                                           |
| 4.92 | Gm27839      | predicted gene, 27839 [gene_biotype:miRNA transcript_biotype:miRNA]                                                                       |
| 4.92 | ---          | Non-coding transcript identified by NONCODE: Sense No Exonic                                                                              |
| 4.91 | ---          | Non-coding transcript identified by NONCODE: Sense No Exonic                                                                              |
| 4.89 | ---          | Non-coding transcript identified by NONCODE: Linc                                                                                         |
| 4.88 | Gm10443      | predicted pseudogene 10443                                                                                                                |
| 4.84 | Igkv8-30     | immunoglobulin kappa chain variable 8-30                                                                                                  |
| 4.82 | ---          | Mus musculus non-coding RNA, oocyte_clustered_small_RNA1786, complete sequence.                                                           |
| 4.81 | Rps6-ps4     | ribosomal protein S6, pseudogene 4                                                                                                        |
| 4.80 | ---          | Mus musculus non-coding RNA, oocyte_clustered_small_RNA9317, complete sequence.                                                           |
| 4.80 | ---          | Mus musculus non-coding RNA, oocyte_clustered_small_RNA9317, complete sequence.                                                           |
| 4.80 | ---          | Mus musculus non-coding RNA, oocyte_clustered_small_RNA9320, complete sequence.                                                           |
| 4.80 | ---          | Non-coding transcript identified by NONCODE: Sense No Exonic                                                                              |
| 4.79 | Rps13-ps2    | ribosomal protein S13, pseudogene 2                                                                                                       |
| 4.78 | Gm27341      | predicted gene, 27341 [gene_biotype:miRNA transcript_biotype:miRNA]                                                                       |
| 4.77 | Rps26        | Mus musculus ribosomal protein S26 (Rps26), mRNA.                                                                                         |
| 4.77 | Gm13312      | predicted gene 13312 [gene_biotype:processed_pseudogene transcript_biotype:processed_pseudogene]                                          |
| 4.76 | Gm13335      | predicted gene 13335 [gene_biotype:antisense transcript_biotype:antisense]                                                                |
| 4.76 | ---          | Non-coding transcript identified by NONCODE: Linc                                                                                         |
| 4.74 | Gm23215      | predicted gene, 23215 [gene_biotype:miRNA transcript_biotype:miRNA]                                                                       |
| 4.73 | Gm24357      | predicted gene, 24357 [gene_biotype:snoRNA transcript_biotype:snoRNA]                                                                     |
| 4.73 | ---          | Non-coding transcript identified by NONCODE: Sense No Exonic                                                                              |
| 4.72 | ---          | Non-coding transcript identified by NONCODE: Sense No Exonic                                                                              |
| 4.72 | ---          | Mus musculus 16 days embryo head cDNA, RIKEN full-length enriched library, clone:C130084F15 product:unclassifiable, full insert sequence. |
| 4.72 | Gm23992      | predicted gene, 23992 [gene_biotype:miRNA transcript_biotype:miRNA]                                                                       |
| 4.71 | ---          | Non-coding transcript identified by Luo, et al.                                                                                           |
| 4.69 | ---          | Non-coding transcript identified by NONCODE: Sense No Exonic                                                                              |
| 4.63 | ---          | Non-coding transcript identified by NONCODE: Sense No Exonic                                                                              |
| 4.59 | ---          | Non-coding transcript identified by NONCODE: Sense No Exonic                                                                              |
| 4.58 | ---          | Non-coding transcript identified by NONCODE: Sense No Exonic                                                                              |
| 4.58 | ---          | Non-coding transcript identified by NONCODE: Sense No Exonic                                                                              |
| 4.57 | ---          | Non-coding transcript identified by NONCODE: Sense No Exonic                                                                              |
| 4.56 | Gm10481      | predicted gene 10481 [gene_biotype:processed_pseudogene transcript_biotype:processed_pseudogene]                                          |
| 4.56 | ---          | Non-coding transcript identified by NONCODE: Antisense                                                                                    |
| 4.53 | ---          | Non-coding transcript identified by NONCODE: Sense No Exonic                                                                              |
| 4.52 | Gm24766      | predicted gene, 24766 [gene_biotype:miRNA transcript_biotype:miRNA]                                                                       |
| 4.52 | Gm25817      | predicted gene, 25817 [gene_biotype:miRNA transcript_biotype:miRNA]                                                                       |
| 4.50 | ---          | Non-coding transcript identified by Luo, et al.                                                                                           |
| 4.50 | ---          | Non-coding transcript identified by NONCODE: Sense No Exonic                                                                              |
| 4.50 | ---          | Non-coding transcript identified by NONCODE: Sense No Exonic                                                                              |
| 4.49 | Gm22464      | predicted gene, 22464 [gene_biotype:miRNA transcript_biotype:miRNA]                                                                       |
| 4.48 | Gm5423       | predicted gene 5423 [gene_biotype:protein_coding transcript_biotype:protein_coding]                                                       |
| 4.48 | Gm27437      | predicted gene, 27437 [gene_biotype:miRNA transcript_biotype:miRNA]                                                                       |
| 4.47 | ---          | Non-coding transcript identified by Luo, et al.                                                                                           |
| 4.47 | ---          | Non-coding transcript identified by NONCODE: Linc                                                                                         |

|      |           |                                                                                                     |
|------|-----------|-----------------------------------------------------------------------------------------------------|
| 4.44 | ---       | Non-coding transcript identified by NONCODE: Linc                                                   |
| 4.42 | ---       | Non-coding transcript identified by NONCODE: Sense No Exonic                                        |
| 4.41 | Mir682    | Mus musculus microRNA 682 (Mir682), microRNA.                                                       |
| 4.40 | Rbp2      | Mus musculus retinol binding protein 2, cellular (Rbp2), mRNA.                                      |
| 4.40 | Gm24710   | predicted gene, 24710 [gene_biotype:miRNA transcript_biotype:miRNA]                                 |
| 4.40 | Gm24135   | predicted gene, 24135 [gene_biotype:miRNA transcript_biotype:miRNA]                                 |
| 4.38 | Srp54a    | Mus musculus signal recognition particle 54A (Srp54a), mRNA.                                        |
| 4.37 | Gm4518    | predicted gene 4518 [gene_biotype:processed_pseudogene transcript_biotype:processed_pseudogene]     |
| 4.37 | Gm8988    | predicted gene 8988 [gene_biotype:unprocessed_pseudogene transcript_biotype:unprocessed_pseudogene] |
| 4.37 | ---       | Non-coding transcript identified by NONCODE: Sense No Exonic                                        |
| 4.36 | ---       | Non-coding transcript identified by NONCODE: Sense No Exonic                                        |
| 4.36 | ---       | Non-coding transcript identified by Luo, et al.                                                     |
| 4.35 | ---       | Non-coding transcript identified by NONCODE: Sense No Exonic                                        |
| 4.34 | Gm27684   | predicted gene, 27684 [gene_biotype:miRNA transcript_biotype:miRNA]                                 |
| 4.34 | AA414768  | Mus musculus expressed sequence AA414768 (AA414768), mRNA.                                          |
| 4.33 | ---       | Non-coding transcript identified by NONCODE: Sense No Exonic                                        |
| 4.33 | ---       | Non-coding transcript identified by NONCODE: Linc                                                   |
| 4.31 | ---       | Non-coding transcript identified by NONCODE: Sense No Exonic                                        |
| 4.30 | ---       | Non-coding transcript identified by NONCODE: Sense No Exonic                                        |
| 4.30 | ---       | Non-coding transcript identified by NONCODE: Sense No Exonic                                        |
| 4.30 | ---       | Non-coding transcript identified by Luo, et al.                                                     |
| 4.30 | ---       | Non-coding transcript identified by NONCODE: Sense No Exonic                                        |
| 4.27 | Gm23943   | predicted gene, 23943 [gene_biotype:miRNA transcript_biotype:miRNA]                                 |
| 4.27 | ---       | Non-coding transcript identified by NONCODE: Sense No Exonic                                        |
| 4.27 | ---       | Non-coding transcript identified by NONCODE: Sense No Exonic                                        |
| 4.26 | Scg5      | Mus musculus secretogranin V (Scg5), mRNA.                                                          |
| 4.25 | Gm26231   | predicted gene, 26231 [gene_biotype:miRNA transcript_biotype:miRNA]                                 |
| 4.25 | Gm22234   | predicted gene, 22234 [gene_biotype:miRNA transcript_biotype:miRNA]                                 |
| 4.23 | ---       | Non-coding transcript identified by NONCODE: Sense No Exonic                                        |
| 4.22 | ---       | Non-coding transcript identified by NONCODE: Sense No Exonic                                        |
| 4.22 | ---       | Non-coding transcript identified by Luo, et al.                                                     |
| 4.21 | ---       | Non-coding transcript identified by NONCODE: Sense No Exonic                                        |
| 4.21 | ---       | Non-coding transcript identified by NONCODE: Linc                                                   |
| 4.20 | Sepp1     | Mus musculus selenoprotein P, plasma, 1 (Sepp1), transcript variant 2, mRNA.                        |
| 4.20 | ---       | Non-coding transcript identified by NONCODE: Linc                                                   |
| 4.19 | Slitrk6   | Mus musculus SLIT and NTRK-like family, member 6 (Slitrk6), mRNA.                                   |
| 4.18 | Gm11930   | predicted gene 11930 [gene_biotype:processed_pseudogene transcript_biotype:processed_pseudogene]    |
| 4.17 | Gm6576    | predicted gene 6576 [gene_biotype:protein_coding transcript_biotype:protein_coding]                 |
| 4.17 | Gm27704   | predicted gene, 27704 [gene_biotype:miRNA transcript_biotype:miRNA]                                 |
| 4.16 | ---       | Non-coding transcript identified by NONCODE: Sense No Exonic                                        |
| 4.15 | G6pc2     | Mus musculus glucose-6-phosphatase, catalytic, 2 (G6pc2), transcript variant 2, mRNA.               |
| 4.15 | Maob      | Mus musculus monoamine oxidase B (Maob), mRNA.                                                      |
| 4.14 | Plac8     | Mus musculus placenta-specific 8 (Plac8), mRNA.                                                     |
| 4.14 | Gm27892   | predicted gene, 27892 [gene_biotype:miRNA transcript_biotype:miRNA]                                 |
| 4.14 | Gm20004   | PREDICTED: predicted gene, 20004 (Gm20004), miscRNA.                                                |
| 4.14 | ---       | Non-coding transcript identified by Luo, et al.                                                     |
| 4.13 | ---       | Mus musculus cDNA, clone:Y2G0105110, strand:unspecified.                                            |
| 4.13 | Apob      | Mus musculus apolipoprotein B (Apob), mRNA.                                                         |
| 4.12 | Gm27529   | predicted gene, 27529 [gene_biotype:miRNA transcript_biotype:miRNA]                                 |
| 4.10 | Gm26905   | predicted gene, 26905 [gene_biotype:lincRNA transcript_biotype:lincRNA]                             |
| 4.10 | ---       | Non-coding transcript identified by NONCODE: Linc                                                   |
| 4.09 | H2-Ab1    | Mus musculus histocompatibility 2, class II antigen A, beta 1 (H2-Ab1), mRNA.                       |
| 4.09 | Gm10284   | predicted pseudogene 10284                                                                          |
| 4.08 | Gm10358   | predicted gene 10358 [gene_biotype:processed_pseudogene transcript_biotype:processed_pseudogene]    |
| 4.08 | ---       | Non-coding transcript identified by Luo, et al.                                                     |
| 4.08 | ---       | Non-coding transcript identified by NONCODE: Linc                                                   |
| 4.06 | Ttc39aos1 | Ttc39a opposite strand RNA 1 [gene_biotype:antisense transcript_biotype:antisense]                  |
| 4.05 | ---       | Non-coding transcript identified by NONCODE: Sense No Exonic                                        |
| 4.03 | ---       | Non-coding transcript identified by Luo, et al.                                                     |
| 4.03 | ---       | Non-coding transcript identified by NONCODE: Sense No Exonic                                        |
| 4.03 | Gm25754   | predicted gene, 25754 [gene_biotype:miRNA transcript_biotype:miRNA]                                 |
| 4.03 | Gm24802   | predicted gene, 24802 [gene_biotype:miRNA transcript_biotype:miRNA]                                 |
| 4.03 | Gm22419   | predicted gene, 22419 [gene_biotype:miRNA transcript_biotype:miRNA]                                 |
| 4.03 | Gm22112   | predicted gene, 22112 [gene_biotype:miRNA transcript_biotype:miRNA]                                 |
| 4.03 | Gm24744   | predicted gene, 24744 [gene_biotype:miRNA transcript_biotype:miRNA]                                 |
| 4.03 | Gm26137   | predicted gene, 26137 [gene_biotype:miRNA transcript_biotype:miRNA]                                 |
| 4.03 | Gm22029   | predicted gene, 22029 [gene_biotype:miRNA transcript_biotype:miRNA]                                 |
| 4.03 | Gm25347   | predicted gene, 25347 [gene_biotype:miRNA transcript_biotype:miRNA]                                 |
| 4.03 | Gm24567   | predicted gene, 24567 [gene_biotype:miRNA transcript_biotype:miRNA]                                 |
| 4.03 | Gm22991   | predicted gene, 22991 [gene_biotype:miRNA transcript_biotype:miRNA]                                 |
| 4.03 | Gm23304   | predicted gene, 23304 [gene_biotype:miRNA transcript_biotype:miRNA]                                 |
| 4.03 | Gm25774   | predicted gene, 25774 [gene_biotype:miRNA transcript_biotype:miRNA]                                 |
| 4.03 | Gm25778   | predicted gene, 25778 [gene_biotype:miRNA transcript_biotype:miRNA]                                 |
| 4.03 | Gm26248   | predicted gene, 26248 [gene_biotype:miRNA transcript_biotype:miRNA]                                 |
| 4.03 | Gm23844   | predicted gene, 23844 [gene_biotype:miRNA transcript_biotype:miRNA]                                 |
| 4.03 | Gm23177   | predicted gene, 23177 [gene_biotype:miRNA transcript_biotype:miRNA]                                 |
| 4.03 | Gm26190   | predicted gene, 26190 [gene_biotype:miRNA transcript_biotype:miRNA]                                 |

|      |              |                                                                                                                           |
|------|--------------|---------------------------------------------------------------------------------------------------------------------------|
| 4.03 | Gm22102      | predicted gene, 22102 [gene_biotype:miRNA transcript_biotype:miRNA]                                                       |
| 4.03 | Gm24193      | predicted gene, 24193 [gene_biotype:miRNA transcript_biotype:miRNA]                                                       |
| 4.03 | Gm25208      | predicted gene, 25208 [gene_biotype:miRNA transcript_biotype:miRNA]                                                       |
| 4.03 | Gm25228      | predicted gene, 25228 [gene_biotype:miRNA transcript_biotype:miRNA]                                                       |
| 4.03 | Gm24427      | predicted gene, 24427 [gene_biotype:miRNA transcript_biotype:miRNA]                                                       |
| 4.03 | Gm22346      | predicted gene, 22346 [gene_biotype:miRNA transcript_biotype:miRNA]                                                       |
| 4.03 | Gm23606      | predicted gene, 23606 [gene_biotype:miRNA transcript_biotype:miRNA]                                                       |
| 4.03 | Gm24617      | predicted gene, 24617 [gene_biotype:miRNA transcript_biotype:miRNA]                                                       |
| 4.03 | Gm24484      | predicted gene, 24484 [gene_biotype:miRNA transcript_biotype:miRNA]                                                       |
| 4.01 | ---          | Non-coding transcript identified by NONCODE: Sense No Exonic                                                              |
| 4.00 | ---          | Non-coding transcript identified by Luo, et al.                                                                           |
| 3.98 | ---          | Non-coding transcript identified by NONCODE: Linc                                                                         |
| 3.97 | Cr1l         | Mus musculus complement component (3b/4b) receptor 1-like (Cr1l), mRNA.                                                   |
| 3.96 | Cst3         | Mus musculus cystatin C (Cst3), mRNA.                                                                                     |
| 3.96 | Gm23551      | predicted gene, 23551 [gene_biotype:miRNA transcript_biotype:miRNA]                                                       |
| 3.95 | ---          | Non-coding transcript identified by NONCODE: Sense No Exonic                                                              |
| 3.95 | ---          | Non-coding transcript identified by NONCODE: Sense No Exonic                                                              |
| 3.94 | Gm25171      | predicted gene, 25171 [gene_biotype:miRNA transcript_biotype:miRNA]                                                       |
| 3.94 | Gm25110      | predicted gene, 25110 [gene_biotype:miRNA transcript_biotype:miRNA]                                                       |
| 3.94 | Gm25775      | predicted gene, 25775 [gene_biotype:miRNA transcript_biotype:miRNA]                                                       |
| 3.94 | Gm24795      | predicted gene, 24795 [gene_biotype:miRNA transcript_biotype:miRNA]                                                       |
| 3.91 | Hmgn5        | Mus musculus high-mobility group nucleosome binding domain 5 (Hmgn5), mRNA.                                               |
| 3.91 | ---          | Non-coding transcript identified by NONCODE: Sense No Exonic                                                              |
| 3.90 | Gm2546       | predicted gene 2546 [gene_biotype:processed_pseudogene transcript_biotype:processed_pseudogene]                           |
| 3.90 | Adh6a        | Mus musculus alcohol dehydrogenase 6A (class V) (Adh6a), mRNA.                                                            |
| 3.89 | ---          | Non-coding transcript identified by NONCODE: Linc                                                                         |
| 3.89 | ---          | Non-coding transcript identified by NONCODE: Sense No Exonic                                                              |
| 3.89 | ---          | Non-coding transcript identified by NONCODE: Linc                                                                         |
| 3.88 | ---          | Non-coding transcript identified by NONCODE: Sense No Exonic                                                              |
| 3.88 | ---          | Non-coding transcript identified by NONCODE: Linc                                                                         |
| 3.86 | ---          | Non-coding transcript identified by NONCODE: Sense No Exonic                                                              |
| 3.86 | ---          | Non-coding transcript identified by NONCODE: Linc                                                                         |
| 3.86 | ---          | Non-coding transcript identified by NONCODE: Sense No Exonic                                                              |
| 3.85 | ---          | Non-coding transcript identified by NONCODE: Sense No Exonic                                                              |
| 3.83 | Gm12338      | predicted gene 12338                                                                                                      |
| 3.82 | ---          | Non-coding transcript identified by NONCODE: Linc                                                                         |
| 3.82 | Vkorc1       | Mus musculus vitamin K epoxide reductase complex, subunit 1 (Vkorc1), mRNA.                                               |
| 3.82 | Gm22852      | predicted gene, 22852 [gene_biotype:miRNA transcript_biotype:miRNA]                                                       |
| 3.81 | ---          | ncrna:novel scaffold:GRCm38:GL456372.1:13262:13382:-1 gene:ENSMUSG00000094621 gene_biotype:miRNA transcript_biotype:miRNA |
| 3.81 | Srp54b       | Mus musculus signal recognition particle 54B (Srp54b), mRNA.                                                              |
| 3.81 | Gm8566       | predicted pseudogene 8566 [gene_biotype:processed_pseudogene transcript_biotype:processed_pseudogene]                     |
| 3.80 | Slc5a1       | Mus musculus solute carrier family 5 (sodium/glucose cotransporter), member 1 (Slc5a1), mRNA.                             |
| 3.80 | Prap1        | Mus musculus proline-rich acidic protein 1 (Prap1), mRNA.                                                                 |
| 3.79 | ---          | Non-coding transcript identified by NONCODE: Linc                                                                         |
| 3.79 | ---          | Non-coding transcript identified by NONCODE: Linc                                                                         |
| 3.79 | ---          | Non-coding transcript identified by NONCODE: Linc                                                                         |
| 3.79 | Slc30a8      | Mus musculus solute carrier family 30 (zinc transporter), member 8 (Slc30a8), mRNA.                                       |
| 3.78 | ---          | Non-coding transcript identified by NONCODE: Sense No Exonic                                                              |
| 3.78 | Gm15501      | predicted pseudogene 15501                                                                                                |
| 3.78 | ---          | Non-coding transcript identified by Luo, et al.                                                                           |
| 3.77 | Adam4        | Mus musculus a disintegrin and metallopeptidase domain 4 (Adam4), mRNA.                                                   |
| 3.76 | Pcsk2        | Mus musculus proprotein convertase subtilisin/kexin type 2 (Pcsk2), mRNA.                                                 |
| 3.75 | Gm25297      | predicted gene, 25297 [gene_biotype:miRNA transcript_biotype:miRNA]                                                       |
| 3.70 | Cdhr5        | Mus musculus cadherin-related family member 5 (Cdhr5), transcript variant 1, mRNA.                                        |
| 3.68 | ---          | Non-coding transcript identified by NONCODE: Sense No Exonic                                                              |
| 3.68 | ---          | Non-coding transcript identified by NONCODE: Antisense                                                                    |
| 3.67 | ---          | Non-coding transcript identified by NONCODE: Sense No Exonic                                                              |
| 3.67 | LOC100861633 | PREDICTED: uncharacterized LOC100861633 (LOC100861633), miscRNA.                                                          |
| 3.67 | ---          | Non-coding transcript identified by NONCODE: Sense No Exonic                                                              |
| 3.66 | ---          | Non-coding transcript identified by NONCODE: Sense No Exonic                                                              |
| 3.66 | ---          | Non-coding transcript identified by Luo, et al.                                                                           |
| 3.66 | ---          | Non-coding transcript identified by NONCODE: Linc                                                                         |
| 3.64 | Gm19491      | PREDICTED: predicted gene, 19491 (Gm19491), miscRNA.                                                                      |
| 3.64 | ---          | Non-coding transcript identified by NONCODE: Sense No Exonic                                                              |
| 3.64 | Snap25       | Mus musculus synaptosomal-associated protein 25 (Snap25), transcript variant 1, mRNA.                                     |
| 3.64 | ---          | Non-coding transcript identified by NONCODE: Sense No Exonic                                                              |
| 3.64 | ---          | Non-coding transcript identified by NONCODE: Sense No Exonic                                                              |
| 3.63 | ---          | Non-coding transcript identified by NONCODE: Sense No Exonic                                                              |
| 3.63 | ---          | Non-coding transcript identified by NONCODE: Sense No Exonic                                                              |
| 3.63 | Maged1       | Mus musculus melanoma antigen, family D, 1 (Maged1), mRNA.                                                                |
| 3.62 | ---          | Non-coding transcript identified by NONCODE: Sense No Exonic                                                              |
| 3.61 | Gm11631      | predicted gene 11631 [gene_biotype:processed_pseudogene transcript_biotype:processed_pseudogene]                          |
| 3.60 | ---          | Non-coding transcript identified by NONCODE: Linc                                                                         |
| 3.60 | ---          | Non-coding transcript identified by NONCODE: Linc                                                                         |
| 3.60 | Gm26853      | predicted gene, 26853 [gene_biotype:lincRNA transcript_biotype:lincRNA]                                                   |
| 3.58 | Gm27525      | predicted gene, 27525 [gene_biotype:miRNA transcript_biotype:miRNA]                                                       |
| 3.58 | Mir1950      | Mus musculus microRNA 1950 (Mir1950), microRNA.                                                                           |

|      |           |                                                                                                                             |
|------|-----------|-----------------------------------------------------------------------------------------------------------------------------|
| 3.57 | Gm26158   | predicted gene, 26158 [gene_biotype:snoRNA transcript_biotype:snoRNA]                                                       |
| 3.56 | ---       | Non-coding transcript identified by Luo, et al.                                                                             |
| 3.54 | ---       | Non-coding transcript identified by NONCODE: Sense No Exonic                                                                |
| 3.54 | ---       | Non-coding transcript identified by NONCODE: Linc                                                                           |
| 3.54 | ---       | Non-coding transcript identified by Luo, et al.                                                                             |
| 3.53 | Mir1927   | microRNA 1927                                                                                                               |
| 3.53 | Mir1927   | Mus musculus microRNA 1927 (Mir1927), microRNA.                                                                             |
| 3.53 | ---       | Non-coding transcript identified by NONCODE: Sense No Exonic                                                                |
| 3.53 | Gm12033   | predicted gene 12033                                                                                                        |
| 3.53 | ---       | Non-coding transcript identified by NONCODE: Sense No Exonic                                                                |
| 3.52 | ---       | Non-coding transcript identified by NONCODE: Sense No Exonic                                                                |
| 3.52 | ---       | Non-coding transcript identified by NONCODE: Sense No Exonic                                                                |
| 3.52 | Gm22637   | predicted gene, 22637                                                                                                       |
| 3.52 | Srp54b    | signal recognition particle 54B (Srp54b), mRNA.                                                                             |
| 3.51 | ---       | Non-coding transcript identified by NONCODE: Sense No Exonic                                                                |
| 3.51 | Gm6768    | predicted gene 6768 [gene_biotype:protein_coding transcript_biotype:protein_coding]                                         |
| 3.50 | Drr1      | developmentally regulated repeat element-containing transcript 1                                                            |
| 3.50 | Gm23736   | predicted gene, 23736 [gene_biotype:snoRNA transcript_biotype:snoRNA]                                                       |
| 3.50 | ---       | Non-coding transcript identified by NONCODE: Linc                                                                           |
| 3.50 | ---       | Non-coding transcript identified by NONCODE: Sense No Exonic                                                                |
| 3.49 | ---       | Non-coding transcript identified by Luo, et al.                                                                             |
| 3.49 | Gm10263   | predicted gene 10263 [gene_biotype:protein_coding transcript_biotype:protein_coding]                                        |
| 3.48 | ---       | Non-coding transcript identified by NONCODE: Sense No Exonic                                                                |
| 3.47 | ---       | Non-coding transcript identified by NONCODE: Sense No Exonic                                                                |
| 3.47 | Gm5884    | predicted pseudogene 5884 [gene_biotype:processed_pseudogene transcript_biotype:processed_pseudogene]                       |
| 3.47 | Sod1      | Mus musculus superoxide dismutase 1, soluble (Sod1), mRNA.                                                                  |
| 3.47 | Mir3473f  | Mus musculus microRNA 3473f (Mir3473f), microRNA.                                                                           |
| 3.47 | ---       | Non-coding transcript identified by NONCODE: Sense No Exonic                                                                |
| 3.46 | ---       | Non-coding transcript identified by NONCODE: Sense No Exonic                                                                |
| 3.45 | ---       | Non-coding transcript identified by NONCODE: Sense No Exonic                                                                |
| 3.45 | Gm22468   | predicted gene, 22468 [gene_biotype:miRNA transcript_biotype:miRNA]                                                         |
| 3.45 | ---       | Non-coding transcript identified by NONCODE: Sense No Exonic                                                                |
| 3.44 | ---       | Non-coding transcript identified by NONCODE: Sense No Exonic                                                                |
| 3.43 | Gng12     | Mus musculus guanine nucleotide binding protein (G protein), gamma 12 (Gng12), transcript variant 6, mRNA.                  |
| 3.43 | Gm25483   | predicted gene, 25483 [gene_biotype:snoRNA transcript_biotype:snoRNA]                                                       |
| 3.43 | ---       | Non-coding transcript identified by NONCODE: Antisense                                                                      |
| 3.42 | ---       | Non-coding transcript identified by NONCODE: Sense No Exonic                                                                |
| 3.42 | Atp2a2    | Mus musculus ATPase, Ca <sup>++</sup> transporting, cardiac muscle, slow twitch 2 (Atp2a2), transcript variant 1, mRNA.     |
| 3.41 | Hist2h4   | Mus musculus histone cluster 2, H4 (Hist2h4), mRNA.                                                                         |
| 3.41 | ---       | Non-coding transcript identified by NONCODE: Sense No Exonic                                                                |
| 3.41 | ---       | Non-coding transcript identified by NONCODE: Sense No Exonic                                                                |
| 3.41 | Scg3      | Mus musculus secretogranin III (Scg3), transcript variant 2, mRNA.                                                          |
| 3.40 | ---       | Mus musculus non-coding RNA, oocyte_clustered_small_RNA10782, complete sequence.                                            |
| 3.40 | ---       | Non-coding transcript identified by Luo, et al.                                                                             |
| 3.40 | ---       | Non-coding transcript identified by NONCODE: Sense No Exonic                                                                |
| 3.40 | ---       | Non-coding transcript identified by NONCODE: Sense No Exonic                                                                |
| 3.40 | ---       | Non-coding transcript identified by NONCODE: Sense No Exonic                                                                |
| 3.39 | ---       | Non-coding transcript identified by NONCODE: Sense No Exonic                                                                |
| 3.39 | ---       | Non-coding transcript identified by NONCODE: Sense No Exonic                                                                |
| 3.39 | ---       | Non-coding transcript identified by NONCODE: Sense No Exonic                                                                |
| 3.39 | ---       | Non-coding transcript identified by Luo, et al.                                                                             |
| 3.38 | Spint1    | Mus musculus serine protease inhibitor, Kunitz type 1 (Spint1), mRNA.                                                       |
| 3.38 | ---       | Non-coding transcript identified by NONCODE: Sense No Exonic                                                                |
| 3.38 | ---       | Non-coding transcript identified by Luo, et al.                                                                             |
| 3.37 | ---       | Non-coding transcript identified by NONCODE: Linc                                                                           |
| 3.37 | ---       | Mus musculus non-coding RNA, oocyte_piRNA2705, complete sequence.                                                           |
| 3.37 | ---       | Mus musculus non-coding RNA, oocyte_piRNA2705, complete sequence.                                                           |
| 3.37 | ---       | Mus musculus non-coding RNA, oocyte_clustered_small_RNA943, complete sequence.                                              |
| 3.36 | ---       | Non-coding transcript identified by NONCODE: Sense No Exonic                                                                |
| 3.36 | ---       | Non-coding transcript identified by NONCODE: Sense No Exonic                                                                |
| 3.35 | ---       | Non-coding transcript identified by NONCODE: Linc                                                                           |
| 3.35 | Gm12122   | predicted gene 12122 [gene_biotype:sense_intronic transcript_biotype:sense_intronic]                                        |
| 3.34 | ---       | Non-coding transcript identified by NONCODE: Sense No Exonic                                                                |
| 3.34 | ---       | Non-coding transcript identified by Luo, et al.                                                                             |
| 3.34 | ---       | Non-coding transcript identified by NONCODE: Sense No Exonic                                                                |
| 3.34 | ---       | Non-coding transcript identified by Luo, et al.                                                                             |
| 3.33 | Gm3020    | Mus musculus predicted gene 3020 (Gm3020), non-coding RNA.                                                                  |
| 3.33 | Crry-ps   | complement receptor related protein, pseudogene [gene_biotype:processed_pseudogene transcript_biotype:processed_pseudogene] |
| 3.33 | ---       | Non-coding transcript identified by NONCODE: Linc                                                                           |
| 3.33 | ---       | Non-coding transcript identified by Luo, et al.                                                                             |
| 3.32 | Slc7a14   | Mus musculus solute carrier family 7 (cationic amino acid transporter, y <sup>+</sup> system), member 14 (Slc7a14), mRNA.   |
| 3.32 | Gm10048   | predicted gene 10048                                                                                                        |
| 3.32 | Hist1h2bc | Mus musculus histone cluster 1, H2bc (Hist1h2bc), transcript variant 1, mRNA.                                               |
| 3.32 | ---       | Non-coding transcript identified by NONCODE: Sense No Exonic                                                                |
| 3.31 | ---       | Non-coding transcript identified by NONCODE: Sense No Exonic                                                                |
| 3.31 | ---       | Non-coding transcript identified by NONCODE: Sense No Exonic                                                                |
| 3.31 | ---       | Non-coding transcript identified by NONCODE: Sense No Exonic                                                                |

|      |               |                                                                                                                             |
|------|---------------|-----------------------------------------------------------------------------------------------------------------------------|
| 3.30 | ---           | Non-coding transcript identified by NONCODE: Sense No Exonic                                                                |
| 3.29 | Guca2b        | Mus musculus guanylate cyclase activator 2b (retina) (Guca2b), mRNA.                                                        |
| 3.28 | Gm23722       | predicted gene, 23722 [gene_biotype:snoRNA transcript_biotype:snoRNA]                                                       |
| 3.28 | Serinc3       | Mus musculus serine incorporator 3 (Serinc3), mRNA.                                                                         |
| 3.28 | ---           | Non-coding transcript identified by NONCODE: Linc                                                                           |
| 3.28 | Olf1055       | Mus musculus olfactory receptor 1055 (Olf1055), transcript variant 2, mRNA.                                                 |
| 3.28 | Argef3        | Mus musculus ARFGEF family member 3 (Argef3), mRNA.                                                                         |
| 3.27 | Gm6311        | predicted gene 6311 [gene_biotype:pseudogene transcript_biotype:pseudogene]                                                 |
| 3.27 | Gm2574        | predicted pseudogene 2574                                                                                                   |
| 3.27 | Higd2a        | Mus musculus HIG1 domain family, member 2A (Higd2a), mRNA.                                                                  |
| 3.27 | ---           | Non-coding transcript identified by Luo, et al.                                                                             |
| 3.27 | Gm22095       | predicted gene, 22095 [gene_biotype:miRNA transcript_biotype:miRNA]                                                         |
| 3.26 | ---           | Mus musculus non-coding RNA, oocyte_clustered_small_RNA5134, complete sequence.                                             |
| 3.26 | ---           | Mus musculus non-coding RNA, oocyte_clustered_small_RNA5129, complete sequence.                                             |
| 3.26 | ---           | Non-coding transcript identified by Luo, et al.                                                                             |
| 3.26 | Cd74          | Mus musculus CD74 antigen (invariant polypeptide of major histocompatibility complex, class II antigen-associated) (Cd74)   |
| 3.25 | ---           | Non-coding transcript identified by NONCODE: Sense No Exonic                                                                |
| 3.24 | ---           | Non-coding transcript identified by NONCODE: Sense No Exonic                                                                |
| 3.24 | ---           | Non-coding transcript identified by NONCODE: Sense No Exonic                                                                |
| 3.23 | ---           | Non-coding transcript identified by NONCODE: Antisense                                                                      |
| 3.23 | Gm19474       | PREDICTED: predicted gene, 19474, transcript variant 2 (Gm19474), miscRNA.                                                  |
| 3.23 | LOC100862175  | PREDICTED: uncharacterized LOC100862175 (LOC100862175), miscRNA.                                                            |
| 3.22 | ---           | Non-coding transcript identified by NONCODE: Linc                                                                           |
| 3.22 | Rpl28-ps1     | ribosomal protein L28, pseudogene 1                                                                                         |
| 3.22 | Txnip         | Mus musculus thioredoxin interacting protein (Txnip), transcript variant 1, mRNA.                                           |
| 3.22 | ---           | Non-coding transcript identified by NONCODE: Sense No Exonic                                                                |
| 3.22 | Gm15920       | predicted gene 15920 [gene_biotype:processed_pseudogene transcript_biotype:processed_pseudogene]                            |
| 3.21 | ---           | Non-coding transcript identified by NONCODE: Linc                                                                           |
| 3.21 | ---           | Non-coding transcript identified by NONCODE: Sense No Exonic                                                                |
| 3.21 | Itn2b         | Mus musculus integral membrane protein 2B (Itn2b), mRNA.                                                                    |
| 3.21 | Atp1b3        | Mus musculus ATPase, Na <sup>+</sup> /K <sup>+</sup> transporting, beta 3 polypeptide (Atp1b3), mRNA.                       |
| 3.21 | Clca4b        | Mus musculus chloride channel accessory 4B (Clca4b), mRNA.                                                                  |
| 3.21 | ---           | Non-coding transcript identified by NONCODE: Sense No Exonic                                                                |
| 3.20 | Gm6954        | predicted pseudogene 6954 [gene_biotype:processed_pseudogene transcript_biotype:processed_pseudogene]                       |
| 3.19 | Gm25291       | predicted gene, 25291 [gene_biotype:snoRNA transcript_biotype:snoRNA]                                                       |
| 3.19 | ---           | Non-coding transcript identified by NONCODE: Linc                                                                           |
| 3.19 | Ostc          | Mus musculus oligosaccharyltransferase complex subunit (Ostc), mRNA.                                                        |
| 3.18 | Mir3473f      | microRNA mir-3473f (Mir3473f), microRNA.                                                                                    |
| 3.18 | ---           | Non-coding transcript identified by NONCODE: Sense No Exonic                                                                |
| 3.18 | Gm10557       | predicted gene 10557 [gene_biotype:pseudogene transcript_biotype:pseudogene]                                                |
| 3.18 | ---           | Non-coding transcript identified by NONCODE: Sense No Exonic                                                                |
| 3.17 | ---           | Non-coding transcript identified by NONCODE: Sense No Exonic                                                                |
| 3.17 | ---           | Non-coding transcript identified by NONCODE: Sense No Exonic                                                                |
| 3.17 | Gm12366       | predicted gene 12366 [gene_biotype:processed_pseudogene transcript_biotype:processed_pseudogene]                            |
| 3.16 | ---           | Non-coding transcript identified by NONCODE: Linc                                                                           |
| 3.16 | ---           | Mus musculus non-coding RNA, oocyte_clustered_small_RNA5265, complete sequence.                                             |
| 3.16 | ---           | Mus musculus non-coding RNA, oocyte_clustered_small_RNA5265, complete sequence.                                             |
| 3.16 | ---           | Mus musculus non-coding RNA, oocyte_clustered_small_RNA5265, complete sequence.                                             |
| 3.16 | ---           | Mus musculus non-coding RNA, oocyte_clustered_small_RNA5265, complete sequence.                                             |
| 3.16 | ---           | Non-coding transcript identified by NONCODE: Sense No Exonic                                                                |
| 3.16 | Mir684-2      | Mus musculus microRNA 684-2 (Mir684-2), microRNA.                                                                           |
| 3.16 | ---           | Non-coding transcript identified by NONCODE: Sense No Exonic                                                                |
| 3.16 | ---           | Non-coding transcript identified by NONCODE: Linc                                                                           |
| 3.15 | ---           | Non-coding transcript identified by Luo, et al.                                                                             |
| 3.15 | ---           | Non-coding transcript identified by NONCODE: Sense No Exonic                                                                |
| 3.14 | Ptprn         | Mus musculus protein tyrosine phosphatase, receptor type, N (Ptprn), mRNA.                                                  |
| 3.14 | ---           | Non-coding transcript identified by NONCODE: Sense No Exonic                                                                |
| 3.14 | Pls1          | Mus musculus plastin 1 (I-isoform) (Pls1), mRNA.                                                                            |
| 3.13 | ---           | Non-coding transcript identified by NONCODE: Linc                                                                           |
| 3.13 | ---           | Non-coding transcript identified by NONCODE: Sense No Exonic                                                                |
| 3.13 | Mir344c       | Mus musculus microRNA 344c (Mir344c), microRNA.                                                                             |
| 3.13 | ---           | Non-coding transcript identified by NONCODE: Sense No Exonic                                                                |
| 3.13 | ---           | Non-coding transcript identified by NONCODE: Sense No Exonic                                                                |
| 3.13 | ---           | Non-coding transcript identified by NONCODE: Sense No Exonic                                                                |
| 3.12 | Muc13         | Mus musculus mucin 13, epithelial transmembrane (Muc13), mRNA.                                                              |
| 3.12 | ---           | Non-coding transcript identified by NONCODE: Antisense                                                                      |
| 3.12 | ---           | Non-coding transcript identified by Luo, et al.                                                                             |
| 3.11 | Rps2-ps10     | ribosomal protein S2, pseudogene 10 [gene_biotype:transcribed_processed_pseudogene transcript_biotype:processed_transcript] |
| 3.11 | Gm14308       | predicted gene 14308 (Gm14308), mRNA.                                                                                       |
| 3.11 | 2010107E04Rik | Mus musculus RIKEN cDNA 2010107E04 gene (2010107E04Rik), mRNA.                                                              |
| 3.11 | Gm3776        | Mus musculus predicted gene 3776 (Gm3776), mRNA.                                                                            |
| 3.11 | Egl3          | EGL nine homolog 3 (C. elegans), mRNA (cDNA clone MGC:36685 IMAGE:5371854), complete cds.                                   |
| 3.10 | ---           | Non-coding transcript identified by NONCODE: Linc                                                                           |
| 3.10 | Rps2-ps6      | ribosomal protein S2, pseudogene 6 [gene_biotype:protein_coding transcript_biotype:protein_coding]                          |
| 3.10 | Sprr2b        | Mus musculus small proline-rich protein 2B (Sprr2b), mRNA.                                                                  |
| 3.10 | Cml5          | Mus musculus camello-like 5 (Cml5), mRNA.                                                                                   |
| 3.09 | Psenen        | Mus musculus presenilin enhancer 2 homolog (C. elegans) (Psenen), mRNA.                                                     |

|      |              |                                                                                                                 |
|------|--------------|-----------------------------------------------------------------------------------------------------------------|
| 3.09 | Gc           | Mus musculus group specific component (Gc), mRNA.                                                               |
| 3.09 | ---          | Non-coding transcript identified by NONCODE: Linc                                                               |
| 3.08 | ---          | Non-coding transcript identified by NONCODE: Linc                                                               |
| 3.08 | ---          | Non-coding transcript identified by NONCODE: Sense No Exonic                                                    |
| 3.08 | Gm3555       | predicted pseudogene 3555 [gene_biotype:processed_pseudogene transcript_biotype:processed_pseudogene]           |
| 3.08 | ---          | Non-coding transcript identified by NONCODE: Sense No Exonic                                                    |
| 3.07 | Cdh1         | Mus musculus cadherin 1 (Cdh1), mRNA.                                                                           |
| 3.07 | Gm22981      | predicted gene, 22981 [gene_biotype:snoRNA transcript_biotype:snoRNA]                                           |
| 3.07 | ---          | Non-coding transcript identified by NONCODE: Linc                                                               |
| 3.07 | Gm15651      | predicted gene 15651 [gene_biotype:processed_transcript transcript_biotype:processed_transcript]                |
| 3.06 | Gm5499       | predicted pseudogene 5499 [gene_biotype:processed_pseudogene transcript_biotype:processed_pseudogene]           |
| 3.06 | ---          | Non-coding transcript identified by NONCODE: Sense No Exonic                                                    |
| 3.06 | Gm2897       | Mus musculus predicted gene 2897 (Gm2897), mRNA.                                                                |
| 3.06 | Mir421       | microRNA 421                                                                                                    |
| 3.05 | Gm25804      | predicted gene, 25804 [gene_biotype:snoRNA transcript_biotype:snoRNA]                                           |
| 3.04 | ---          | Non-coding transcript identified by NONCODE: Linc                                                               |
| 3.04 | Glp1r        | Mus musculus glucagon-like peptide 1 receptor (Glp1r), mRNA.                                                    |
| 3.04 | Rpl19-ps11   | ribosomal protein L19, pseudogene 11                                                                            |
| 3.04 | Gm10053      | predicted gene 10053 [gene_biotype:protein_coding transcript_biotype:protein_coding]                            |
| 3.04 | Papss2       | Mus musculus 3-phosphoadenosine 5-phosphosulfate synthase 2 (Papss2), transcript variant 2, mRNA.               |
| 3.03 | ---          | Non-coding transcript identified by NONCODE: Linc                                                               |
| 3.03 | ---          | Non-coding transcript identified by NONCODE: Sense No Exonic                                                    |
| 3.03 | ---          | Non-coding transcript identified by Luo, et al.                                                                 |
| 3.03 | ---          | Non-coding transcript identified by NONCODE: Sense No Exonic                                                    |
| 3.03 | ---          | Non-coding transcript identified by NONCODE: Sense No Exonic                                                    |
| 3.03 | Tsn          | Mus musculus translin (Tsn), mRNA.                                                                              |
| 3.02 | Mir126b      | Mus musculus microRNA 126b (Mir126b), microRNA.                                                                 |
| 3.02 | ---          | Non-coding transcript identified by NONCODE: Linc                                                               |
| 3.01 | ---          | havana:known chromosome:GRCm38:3:96666503:96666982:-1 gene:ENSMUSG00000105144 gene_biotype:processed            |
| 3.01 | Ugt2b34      | Mus musculus UDP glucuronosyltransferase 2 family, polypeptide B34 (Ugt2b34), mRNA.                             |
| 3.01 | ---          | Non-coding transcript identified by NONCODE: Linc                                                               |
| 3.00 | Gm12669      | predicted gene 12669                                                                                            |
| 3.00 | ---          | Non-coding transcript identified by NONCODE: Linc                                                               |
| 3.00 | Cab39l       | Mus musculus calcium binding protein 39-like (Cab39l), mRNA.                                                    |
| 3.00 | LOC100861791 | PREDICTED: uncharacterized LOC100861791 (LOC100861791), miscRNA.                                                |
| 2.99 | ---          | Non-coding transcript identified by NONCODE: Sense No Exonic                                                    |
| 2.97 | ---          | Non-coding transcript identified by NONCODE: Sense No Exonic                                                    |
| 2.97 | ---          | ensembl:novel scaffold:GRCm38:GL456210.1:135395:136519:-1 gene:ENSMUSG00000079794 gene_biotype:                 |
| 2.96 | Gm3625       | predicted gene 3625                                                                                             |
| 2.96 | Gm7206       | predicted pseudogene 7206 [gene_biotype:processed_pseudogene transcript_biotype:processed_pseudogene]           |
| 2.96 | ---          | Non-coding transcript identified by NONCODE: Sense No Exonic                                                    |
| 2.96 | Rpl31-ps8    | ribosomal protein L31, pseudogene 8 [gene_biotype:processed_pseudogene transcript_biotype:processed_pseudogene] |
| 2.96 | Ssr2         | Mus musculus signal sequence receptor, beta (Ssr2), mRNA.                                                       |
| 2.96 | Ttr          | Mus musculus transthyretin (Ttr), mRNA.                                                                         |
| 2.96 | ---          | Non-coding transcript identified by NONCODE: Sense No Exonic                                                    |
| 2.94 | Gm16265      | predicted gene 16265 [gene_biotype:processed_pseudogene transcript_biotype:processed_pseudogene]                |
| 2.94 | ---          | Non-coding transcript identified by NONCODE: Sense No Exonic                                                    |
| 2.94 | ---          | Non-coding transcript identified by Luo, et al.                                                                 |
| 2.94 | ---          | Non-coding transcript identified by NONCODE: Sense No Exonic                                                    |
| 2.94 | ---          | Non-coding transcript identified by NONCODE: Sense No Exonic                                                    |
| 2.94 | ---          | havana:known chromosome:GRCm38:3:38107443:38107922:-1 gene:ENSMUSG00000105359 gene_biotype                      |
| 2.93 | Gm16354      | predicted gene 16354 [gene_biotype:unprocessed_pseudogene transcript_biotype:unprocessed_pseudogene]            |
| 2.91 | Casp1        | Mus musculus caspase 1 (Casp1), mRNA.                                                                           |
| 2.91 | ---          | Non-coding transcript identified by NONCODE: Sense No Exonic                                                    |
| 2.91 | ---          | Non-coding transcript identified by NONCODE: Sense No Exonic                                                    |
| 2.90 | ---          | Non-coding transcript identified by NONCODE: Sense No Exonic                                                    |
| 2.90 | ---          | Non-coding transcript identified by Luo, et al.                                                                 |
| 2.90 | ---          | Non-coding transcript identified by NONCODE: Sense No Exonic                                                    |
| 2.90 | ---          | Mus musculus RNA for germline small RNA gsRNA6, complete sequence.                                              |
| 2.89 | Pdyn         | Mus musculus prodynorphin (Pdyn), transcript variant 2, mRNA.                                                   |
| 2.89 | Pcsk1        | Mus musculus proprotein convertase subtilisin/kexin type 1 (Pcsk1), mRNA.                                       |
| 2.88 | ---          | Non-coding transcript identified by NONCODE: Sense No Exonic                                                    |
| 2.88 | ---          | Non-coding transcript identified by Luo, et al.                                                                 |
| 2.88 | ---          | Non-coding transcript identified by NONCODE: Sense No Exonic                                                    |
| 2.88 | Ighv1-67     | immunoglobulin heavy variable V1-67                                                                             |
| 2.88 | Gm19269      | PREDICTED: predicted gene, 19269 (Gm19269), miscRNA.                                                            |
| 2.87 | Gm10051      | predicted pseudogene 10051                                                                                      |
| 2.87 | Gm3020       | predicted gene 3020 (Gm3020), non-coding RNA.                                                                   |
| 2.87 | ---          | Mus musculus non-coding RNA, oocyte_clustered_small_RNA13141, complete sequence.                                |
| 2.86 | Gm8841       | PREDICTED: predicted gene 8841 (Gm8841), mRNA.                                                                  |
| 2.86 | Mir495       | Mus musculus microRNA 495 (Mir495), microRNA.                                                                   |
| 2.86 | Mlec         | Mus musculus malectin (Mlec), mRNA.                                                                             |
| 2.86 | ---          | Non-coding transcript identified by NONCODE: Linc                                                               |
| 2.86 | ---          | Non-coding transcript identified by NONCODE: Sense No Exonic                                                    |
| 2.86 | ---          | Non-coding transcript identified by NONCODE: Linc                                                               |
| 2.86 | Gm8258       | predicted gene 8258 [gene_biotype:processed_pseudogene transcript_biotype:processed_pseudogene]                 |
| 2.86 | Arxes2       | Mus musculus adipocyte-related X-chromosome expressed sequence 2 (Arxes2), mRNA.                                |



|      |               |                                                                                                                         |
|------|---------------|-------------------------------------------------------------------------------------------------------------------------|
| 2.86 | Gm21811       | predicted gene, 21811                                                                                                   |
| 2.85 | ---           | Non-coding transcript identified by NONCODE: Sense No Exonic                                                            |
| 2.84 | ---           | Non-coding transcript identified by NONCODE: Sense No Exonic                                                            |
| 2.84 | Gm13651       | predicted gene 13651 [gene_biotype:processed_pseudogene transcript_biotype:processed_pseudogene]                        |
| 2.83 | ---           | Non-coding transcript identified by Luo, et al.                                                                         |
| 2.83 | Ucn3          | Mus musculus urocortin 3 (Ucn3), mRNA.                                                                                  |
| 2.82 | Gm11807       | predicted gene 11807                                                                                                    |
| 2.82 | Pomp          | Mus musculus proteasome maturation protein (Pomp), mRNA.                                                                |
| 2.82 | ---           | Non-coding transcript identified by NONCODE: Linc                                                                       |
| 2.82 | ---           | Non-coding transcript identified by NONCODE: Sense No Exonic                                                            |
| 2.82 | Ctage5        | Mus musculus CTAGE family, member 5 (Ctage5), transcript variant 2, mRNA.                                               |
| 2.82 | ---           | ensembl.novel scaffold:GRCm38:GL456210.1:123792:124928:1 gene:ENSMUSG00000079192 gene_biotype:                          |
| 2.82 | ---           | Non-coding transcript identified by NONCODE: Sense No Exonic                                                            |
| 2.82 | Celf3         | Mus musculus CUGBP, Elav-like family member 3 (Celf3), transcript variant 1, mRNA.                                      |
| 2.81 | Gm22105       | predicted gene, 22105 [gene_biotype:snRNA transcript_biotype:snRNA]                                                     |
| 2.81 | Gm24564       | predicted gene, 24564 [gene_biotype:snoRNA transcript_biotype:snoRNA]                                                   |
| 2.81 | Sult1d1       | Mus musculus sulfotransferase family 1D, member 1 (Sult1d1), mRNA.                                                      |
| 2.80 | ---           | Non-coding transcript identified by NONCODE: Sense No Exonic                                                            |
| 2.80 | Gm26818       | predicted gene, 26818 [gene_biotype:lincRNA transcript_biotype:lincRNA]                                                 |
| 2.80 | Gm27375       | predicted gene, 27375 [gene_biotype:miRNA transcript_biotype:miRNA]                                                     |
| 2.80 | ---           | Non-coding transcript identified by NONCODE: Sense No Exonic                                                            |
| 2.80 | Akt3          | Mus musculus thymoma viral proto-oncogene 3 (Akt3), mRNA.                                                               |
| 2.80 | Gm12396       | predicted gene 12396                                                                                                    |
| 2.78 | ---           | Non-coding transcript identified by NONCODE: Sense No Exonic                                                            |
| 2.78 | ---           | Non-coding transcript identified by NONCODE: Sense No Exonic                                                            |
| 2.78 | 4833439L19Rik | Mus musculus RIKEN cDNA 4833439L19 gene (4833439L19Rik), transcript variant 2, mRNA.                                    |
| 2.78 | ---           | Non-coding transcript identified by NONCODE: Antisense,Sense No Exonic                                                  |
| 2.78 | ---           | Non-coding transcript identified by NONCODE: Linc                                                                       |
| 2.77 | ---           | Non-coding transcript identified by Luo, et al.                                                                         |
| 2.77 | Trim9         | Mus musculus tripartite motif-containing 9 (Trim9), transcript variant 2, mRNA.                                         |
| 2.76 | Gm23956       | predicted gene, 23956 [gene_biotype:rRNA transcript_biotype:rRNA]                                                       |
| 2.76 | Lyrm4         | Mus musculus Lyr motif containing 4 (Lyrm4), mRNA.                                                                      |
| 2.76 | Lipo1         | Mus musculus lipase, member O1 (Lipo1), mRNA.                                                                           |
| 2.76 | Gm23338       | predicted gene, 23338 [gene_biotype:snoRNA transcript_biotype:snoRNA]                                                   |
| 2.76 | Gm5786        | predicted pseudogene 5786 [gene_biotype:protein_coding transcript_biotype:protein_coding]                               |
| 2.75 | ---           | Non-coding transcript identified by NONCODE: Sense No Exonic                                                            |
| 2.75 | Gnao1         | Mus musculus guanine nucleotide binding protein, alpha O (Gnao1), transcript variant B, mRNA.                           |
| 2.75 | Ctsb          | Mus musculus cathepsin B (Ctsb), mRNA.                                                                                  |
| 2.75 | ---           | Non-coding transcript identified by NONCODE: Sense No Exonic                                                            |
| 2.75 | ---           | Non-coding transcript identified by NONCODE: Sense No Exonic                                                            |
| 2.75 | ---           | Non-coding transcript identified by NONCODE: Sense No Exonic                                                            |
| 2.75 | ---           | Non-coding transcript identified by NONCODE: Sense No Exonic                                                            |
| 2.75 | Gm13394       | predicted gene 13394                                                                                                    |
| 2.75 | Gm10131       | predicted pseudogene 10131 [gene_biotype:processed_pseudogene transcript_biotype:processed_pseudogene]                  |
| 2.75 | ---           | Non-coding transcript identified by NONCODE: Linc                                                                       |
| 2.75 | Gm4691        | predicted gene 4691 [gene_biotype:transcribed_processed_pseudogene transcript_biotype:transcribed_processed_pseudogene] |
| 2.73 | ---           | Non-coding transcript identified by NONCODE: Sense No Exonic                                                            |
| 2.73 | Fbx16         | Mus musculus F-box and leucine-rich repeat protein 16 (Fbx16), mRNA.                                                    |
| 2.73 | ---           | Non-coding transcript identified by NONCODE: Sense No Exonic                                                            |
| 2.72 | ---           | Non-coding transcript identified by NONCODE: Sense No Exonic                                                            |
| 2.72 | Gm16243       | predicted gene 16243 [gene_biotype:antisense transcript_biotype:antisense]                                              |
| 2.72 | Gm10025       | predicted gene 10025 [gene_biotype:pseudogene transcript_biotype:pseudogene]                                            |
| 2.72 | ---           | Non-coding transcript identified by NONCODE: Linc                                                                       |
| 2.72 | Gm23872       | predicted gene, 23872 [gene_biotype:miRNA transcript_biotype:miRNA]                                                     |
| 2.72 | Gm15432       | predicted gene 15432 [gene_biotype:processed_pseudogene transcript_biotype:processed_pseudogene]                        |
| 2.72 | ---           | Non-coding transcript identified by NONCODE: Linc                                                                       |
| 2.72 | Gm8237        | predicted gene 8237 [gene_biotype:protein_coding transcript_biotype:protein_coding]                                     |
| 2.72 | Gm8172        | predicted pseudogene 8172 [gene_biotype:processed_pseudogene transcript_biotype:processed_pseudogene]                   |
| 2.71 | Mir341        | Mus musculus microRNA 341 (Mir341), microRNA.                                                                           |
| 2.71 | ---           | Non-coding transcript identified by NONCODE: Sense No Exonic                                                            |
| 2.71 | ---           | Mus musculus non-coding RNA, oocyte_clustered_small_RNA11151, complete sequence.                                        |
| 2.71 | ---           | Non-coding transcript identified by Luo, et al.                                                                         |
| 2.71 | Gm15682       | predicted gene 15682                                                                                                    |
| 2.71 | ---           | Mus musculus cDNA clone IMAGE:3493680.                                                                                  |
| 2.71 | Gm23813       | predicted gene, 23813 [gene_biotype:miRNA transcript_biotype:miRNA]                                                     |
| 2.71 | Mir684-1      | microRNA 684-1 (Mir684-1), microRNA.                                                                                    |
| 2.71 | ---           | Non-coding transcript identified by NONCODE: Linc                                                                       |
| 2.71 | ---           | Non-coding transcript identified by NONCODE: Sense No Exonic                                                            |
| 2.71 | Rps2-ps13     | ribosomal protein S2 (Rps2) pseudogene [gene_biotype:processed_pseudogene transcript_biotype:processed_pseudogene]      |
| 2.71 | Sowahc        | Mus musculus sosonowah ankyrin repeat domain family member C (Sowahc), mRNA.                                            |
| 2.70 | ---           | Non-coding transcript identified by NONCODE: Sense No Exonic                                                            |
| 2.70 | ---           | Non-coding transcript identified by NONCODE: Sense No Exonic                                                            |
| 2.70 | ---           | Non-coding transcript identified by Luo, et al.                                                                         |
| 2.70 | Gm22862       | predicted gene, 22862 [gene_biotype:miRNA transcript_biotype:miRNA]                                                     |
| 2.70 | Myef2         | Mus musculus myelin basic protein expression factor 2, repressor (Myef2), transcript variant 1, mRNA.                   |
| 2.69 | ---           | Non-coding transcript identified by NONCODE: Sense No Exonic                                                            |
| 2.69 | Gm2897        | predicted gene 2897 (Gm2897), transcript variant 1, mRNA.                                                               |

|      |               |                                                                                                             |
|------|---------------|-------------------------------------------------------------------------------------------------------------|
| 2.69 | ---           | Non-coding transcript identified by NONCODE: Sense No Exonic                                                |
| 2.69 | ---           | Non-coding transcript identified by NONCODE: Sense No Exonic                                                |
| 2.68 | ---           | Non-coding transcript identified by NONCODE: Linc                                                           |
| 2.68 | Gm3739        | predicted gene 3739 [gene_biotype:protein_coding transcript_biotype:protein_coding]                         |
| 2.68 | Gm9104        | predicted gene 9104 [gene_biotype:processed_pseudogene transcript_biotype:processed_pseudogene]             |
| 2.68 | Gm6419        | predicted gene 6419 [gene_biotype:processed_pseudogene transcript_biotype:processed_pseudogene]             |
| 2.68 | ---           | Mus musculus piRNA piR-104235, complete sequence.                                                           |
| 2.68 | Aga           | Mus musculus aspartylglucosaminidase (Aga), transcript variant 1, mRNA.                                     |
| 2.68 | ---           | Non-coding transcript identified by NONCODE: Sense No Exonic                                                |
| 2.68 | ---           | Non-coding transcript identified by NONCODE: Sense No Exonic                                                |
| 2.67 | ---           | Non-coding transcript identified by NONCODE: Sense No Exonic                                                |
| 2.67 | LOC100504676  | PREDICTED: uncharacterized LOC100504676 (LOC100504676), miscRNA.                                            |
| 2.67 | ---           | Non-coding transcript identified by Luo, et al.                                                             |
| 2.67 | ---           | Non-coding transcript identified by NONCODE: Sense No Exonic                                                |
| 2.67 | Ociad1        | Mus musculus OCIA domain containing 1 (Ociad1), transcript variant 2, mRNA.                                 |
| 2.67 | Car10         | Mus musculus carbonic anhydrase 10 (Car10), mRNA.                                                           |
| 2.67 | Krt20         | Mus musculus keratin 20 (Krt20), mRNA.                                                                      |
| 2.67 | Gm10293       | predicted pseudogene 10293 [gene_biotype:processed_pseudogene transcript_biotype:processed_pseudogene]      |
| 2.66 | ---           | Non-coding transcript identified by NONCODE: Sense No Exonic                                                |
| 2.66 | ---           | Non-coding transcript identified by Luo, et al.                                                             |
| 2.66 | ---           | Mus musculus RNA for germline small RNA gsRNA276, complete sequence.                                        |
| 2.66 | ---           | Non-coding transcript identified by NONCODE: Sense No Exonic                                                |
| 2.66 | ---           | Non-coding transcript identified by NONCODE: Linc                                                           |
| 2.66 | ---           | Non-coding transcript identified by NONCODE: Sense No Exonic                                                |
| 2.66 | ---           | Non-coding transcript identified by Luo, et al.                                                             |
| 2.66 | Gm16409       | predicted gene 16409 [gene_biotype:processed_pseudogene transcript_biotype:processed_pseudogene]            |
| 2.66 | ---           | Non-coding transcript identified by NONCODE: Sense No Exonic                                                |
| 2.65 | Mir5124a      | microRNA 5124a [gene_biotype:miRNA transcript_biotype:miRNA]                                                |
| 2.64 | Rpl7a-ps11    | ribosomal protein L7A, pseudogene 11                                                                        |
| 2.64 | ---           | Non-coding transcript identified by NONCODE: Antisense                                                      |
| 2.63 | ---           | Non-coding transcript identified by NONCODE: Sense No Exonic                                                |
| 2.63 | Gm11640       | predicted gene 11640 [gene_biotype:antisense transcript_biotype:antisense]                                  |
| 2.63 | ---           | Non-coding transcript identified by NONCODE: Antisense                                                      |
| 2.63 | Gm20053       | PREDICTED: predicted gene, 20053 (Gm20053), miscRNA.                                                        |
| 2.63 | ---           | Non-coding transcript identified by NONCODE: Sense No Exonic                                                |
| 2.63 | Cdhr2         | Mus musculus cadherin-related family member 2 (Cdhr2), mRNA.                                                |
| 2.62 | ---           | Non-coding transcript identified by NONCODE: Sense No Exonic                                                |
| 2.62 | ---           | Non-coding transcript identified by Luo, et al.                                                             |
| 2.62 | Zfp526        | Mus musculus zinc finger protein 526 (Zfp526), mRNA.                                                        |
| 2.62 | ---           | Non-coding transcript identified by NONCODE: Sense No Exonic                                                |
| 2.61 | ---           | Mus musculus non-coding RNA, oocyte_piRNA2191, complete sequence.                                           |
| 2.61 | Ica1          | Mus musculus islet cell autoantigen 1 (Ica1), transcript variant 2, mRNA.                                   |
| 2.61 | Pigr          | Mus musculus polymeric immunoglobulin receptor (Pigr), mRNA.                                                |
| 2.61 | Gm14305       | Mus musculus predicted gene 14305 (Gm14305), mRNA.                                                          |
| 2.61 | Gm17228       | predicted gene 17228 [gene_biotype:processed_pseudogene transcript_biotype:processed_pseudogene]            |
| 2.61 | ---           | Non-coding transcript identified by NONCODE: Sense No Exonic                                                |
| 2.60 | Gm22860       | predicted gene, 22860 [gene_biotype:miRNA transcript_biotype:miRNA]                                         |
| 2.60 | ---           | Non-coding transcript identified by NONCODE: Sense No Exonic                                                |
| 2.60 | ---           | Non-coding transcript identified by NONCODE: Sense No Exonic                                                |
| 2.60 | ---           | Non-coding transcript identified by NONCODE: Sense No Exonic                                                |
| 2.59 | ---           | Non-coding transcript identified by NONCODE: Sense No Exonic                                                |
| 2.59 | Ero1b         | Mus musculus ERO1-like beta (S. cerevisiae) (Ero1b), mRNA.                                                  |
| 2.59 | ---           | Non-coding transcript identified by Luo, et al.                                                             |
| 2.59 | ---           | Mus musculus piRNA piR-131407, complete sequence.                                                           |
| 2.59 | ---           | Non-coding transcript identified by NONCODE: Linc                                                           |
| 2.59 | ---           | Non-coding transcript identified by NONCODE: Sense No Exonic                                                |
| 2.58 | Gm20899       | predicted gene, 20899                                                                                       |
| 2.58 | Gm23873       | predicted gene, 23873 [gene_biotype:miRNA transcript_biotype:miRNA]                                         |
| 2.58 | ---           | Non-coding transcript identified by NONCODE: Sense No Exonic                                                |
| 2.58 | Gm27989       | predicted gene, 27989 [gene_biotype:miRNA transcript_biotype:miRNA]                                         |
| 2.58 | Gm10254       | predicted gene 10254 [gene_biotype:processed_pseudogene transcript_biotype:processed_pseudogene]            |
| 2.58 | Mki67         | Mus musculus antigen identified by monoclonal antibody Ki 67 (Mki67), mRNA.                                 |
| 2.57 | Ace2          | Mus musculus angiotensin I converting enzyme (peptidyl-dipeptidase A) 2 (Ace2), transcript variant 1, mRNA. |
| 2.57 | ---           | Non-coding transcript identified by NONCODE: Sense No Exonic                                                |
| 2.57 | LOC432823     | similar to hypothetical protein MGC37588, mRNA (cDNA clone MGC:28125 IMAGE:3980327), complete cds.          |
| 2.57 | ---           | Non-coding transcript identified by NONCODE: Sense No Exonic                                                |
| 2.57 | A330076H08Rik | Mus musculus RIKEN cDNA A330076H08 gene (A330076H08Rik), long non-coding RNA.                               |
| 2.56 | Gm22548       | predicted gene, 22548 [gene_biotype:miRNA transcript_biotype:miRNA]                                         |
| 2.56 | ---           | Non-coding transcript identified by NONCODE: Sense No Exonic                                                |
| 2.56 | ---           | Non-coding transcript identified by Luo, et al.                                                             |
| 2.56 | ---           | Non-coding transcript identified by NONCODE: Sense No Exonic                                                |
| 2.56 | Mir378c       | Mus musculus microRNA 378c (Mir378c), microRNA.                                                             |
| 2.55 | ---           | Non-coding transcript identified by NONCODE: Sense No Exonic                                                |
| 2.55 | Tmem50b       | Mus musculus transmembrane protein 50B (Tmem50b), mRNA.                                                     |
| 2.55 | ---           | Non-coding transcript identified by NONCODE: Sense No Exonic                                                |
| 2.55 | Abcc8         | Mus musculus ATP-binding cassette, sub-family C (CFTR/MRP), member 8 (Abcc8), mRNA.                         |
| 2.55 | Gm10059       | predicted pseudogene 10059                                                                                  |

|      |               |                                                                                                                               |
|------|---------------|-------------------------------------------------------------------------------------------------------------------------------|
| 2.55 | ---           | Non-coding transcript identified by Luo, et al.                                                                               |
| 2.55 | Peg3          | Mus musculus paternally expressed 3 (Peg3), mRNA.                                                                             |
| 2.55 | ---           | Non-coding transcript identified by NONCODE: Sense No Exonic                                                                  |
| 2.55 | ---           | Non-coding transcript identified by NONCODE: Linc                                                                             |
| 2.55 | ---           | Non-coding transcript identified by NONCODE: Sense No Exonic                                                                  |
| 2.54 | ---           | Non-coding transcript identified by NONCODE: Linc                                                                             |
| 2.54 | LOC100862246  | PREDICTED: uncharacterized LOC100862246 (LOC100862246), miscRNA.                                                              |
| 2.54 | Mir692-1      | Mus musculus microRNA 692-1 (Mir692-1), microRNA.                                                                             |
| 2.54 | ---           | Non-coding transcript identified by NONCODE: Linc                                                                             |
| 2.54 | ---           | Non-coding transcript identified by NONCODE: Sense No Exonic                                                                  |
| 2.53 | Gm6169        | predicted gene 6169 [gene_biotype:protein_coding transcript_biotype:protein_coding]                                           |
| 2.53 | Gm3873        | PREDICTED: predicted gene 3873 (Gm3873), mRNA.                                                                                |
| 2.53 | Slc16a12      | Mus musculus solute carrier family 16 (monocarboxylic acid transporters), member 12 (Slc16a12), mRNA.                         |
| 2.53 | ---           | Non-coding transcript identified by NONCODE: Sense No Exonic                                                                  |
| 2.53 | ---           | Non-coding transcript identified by NONCODE: Sense No Exonic                                                                  |
| 2.53 | Capsl         | Mus musculus calyphosine-like (Capsl), mRNA.                                                                                  |
| 2.53 | Cd55          | Mus musculus CD55 molecule, decay accelerating factor for complement (Cd55), mRNA.                                            |
| 2.53 | Tbl1x         | Mus musculus transducin (beta)-like 1 X-linked (Tbl1x), mRNA.                                                                 |
| 2.53 | Scg2          | Mus musculus secretogranin II (Scg2), transcript variant 1, mRNA.                                                             |
| 2.53 | ---           | Non-coding transcript identified by NONCODE: Sense No Exonic                                                                  |
| 2.52 | Mir325        | Mus musculus microRNA 325 (Mir325), microRNA.                                                                                 |
| 2.52 | ---           | Non-coding transcript identified by NONCODE: Sense No Exonic                                                                  |
| 2.52 | Mir599        | Mus musculus microRNA 599 (Mir599), microRNA.                                                                                 |
| 2.52 | Trmt112-ps2   | tRNA methyltransferase 11-2, pseudogene 2                                                                                     |
| 2.52 | ---           | Non-coding transcript identified by NONCODE: Sense No Exonic                                                                  |
| 2.52 | ---           | Non-coding transcript identified by NONCODE: Sense No Exonic                                                                  |
| 2.52 | Igkv6-15      | immunoglobulin kappa variable 6-15                                                                                            |
| 2.52 | ---           | Non-coding transcript identified by NONCODE: Sense No Exonic                                                                  |
| 2.52 | ---           | Non-coding transcript identified by NONCODE: Sense No Exonic                                                                  |
| 2.51 | Gm21897       | predicted gene, 21897 [gene_biotype:protein_coding transcript_biotype:protein_coding]                                         |
| 2.51 | Mir7026       | Mus musculus microRNA 7026 (Mir7026), microRNA.                                                                               |
| 2.51 | Mrps36-ps1    | mitochondrial ribosomal protein S36, pseudogene 1 [gene_biotype:processed_pseudogene transcript_biotype:processed_pseudogene] |
| 2.51 | Sectm1b       | Mus musculus secreted and transmembrane 1B (Sectm1b), mRNA.                                                                   |
| 2.51 | Ufm1          | Mus musculus ubiquitin-fold modifier 1 (Ufm1), mRNA.                                                                          |
| 2.51 | Slc38a4       | Mus musculus solute carrier family 38, member 4 (Slc38a4), mRNA.                                                              |
| 2.51 | Rab24         | Mus musculus RAB24, member RAS oncogene family (Rab24), mRNA.                                                                 |
| 2.51 | ---           | Non-coding transcript identified by NONCODE: Sense No Exonic                                                                  |
| 2.51 | 2010106E10Rik | Mus musculus RIKEN cDNA 2010106E10 gene (2010106E10Rik), transcript variant 1, mRNA.                                          |
| 2.51 | ---           | Non-coding transcript identified by NONCODE: Sense No Exonic                                                                  |
| 2.50 | ---           | Non-coding transcript identified by NONCODE: Linc                                                                             |
| 2.50 | ---           | Mus musculus RNA for germline small RNA gsRNA265, complete sequence.                                                          |
| 2.50 | ---           | Non-coding transcript identified by NONCODE: Sense No Exonic                                                                  |
| 2.50 | ---           | Non-coding transcript identified by NONCODE: Sense No Exonic                                                                  |
| 2.50 | ---           | Non-coding transcript identified by NONCODE: Linc                                                                             |
| 2.50 | ---           | Non-coding transcript identified by NONCODE: Sense No Exonic                                                                  |
| 2.50 | Vta1          | Mus musculus Vps20-associated 1 homolog (S. cerevisiae) (Vta1), mRNA.                                                         |
| 2.50 | Ccng1         | Mus musculus cyclin G1 (Ccng1), mRNA.                                                                                         |
| 2.50 | Mir29b-1      | Mus musculus microRNA 29b-1 (Mir29b-1), microRNA.                                                                             |
| 2.50 | LOC100861685  | PREDICTED: 60S ribosomal protein L23a-like (LOC100861685), mRNA.                                                              |
| 2.49 | Gm8724        | predicted pseudogene 8724 [gene_biotype:processed_pseudogene transcript_biotype:processed_pseudogene]                         |
| 2.49 | Sdf2l1        | Mus musculus stromal cell-derived factor 2-like 1 (Sdf2l1), mRNA.                                                             |
| 2.49 | ---           | Non-coding transcript identified by NONCODE: Linc                                                                             |
| 2.49 | ---           | Mus musculus piRNA piR-122042, complete sequence.                                                                             |
| 2.49 | ---           | Non-coding transcript identified by NONCODE: Sense No Exonic                                                                  |
| 2.49 | Tmem176b      | Mus musculus transmembrane protein 176B (Tmem176b), transcript variant 2, mRNA.                                               |
| 2.49 | Ighv13-2      | Ighv13-2 immunoglobulin heavy variable 13-2                                                                                   |
| 2.49 | Gm7664        | predicted gene 7664                                                                                                           |
| 2.49 | Dgat2         | Mus musculus diacylglycerol O-acyltransferase 2 (Dgat2), mRNA.                                                                |
| 2.48 | Mttp          | Mus musculus microsomal triglyceride transfer protein (Mttp), transcript variant 1, mRNA.                                     |
| 2.48 | Cox7a2        | Mus musculus cytochrome c oxidase subunit VIIa 2 (Cox7a2), mRNA.                                                              |
| 2.48 | Gm2956        | predicted gene 2956                                                                                                           |
| 2.48 | Spink1        | Mus musculus serine peptidase inhibitor, Kazal type 1 (Spink1), mRNA.                                                         |
| 2.48 | ---           | Non-coding transcript identified by NONCODE: Sense No Exonic                                                                  |
| 2.48 | ---           | Non-coding transcript identified by NONCODE: Linc                                                                             |
| 2.48 | Fahd1         | Mus musculus fumarylacetoacetate hydrolase domain containing 1 (Fahd1), mRNA.                                                 |
| 2.48 | Mir669g       | Mus musculus microRNA 669g (Mir669g), microRNA.                                                                               |
| 2.47 | ---           | Non-coding transcript identified by Luo, et al.                                                                               |
| 2.47 | Lct           | Mus musculus lactase (Lct), mRNA.                                                                                             |
| 2.47 | ---           | Mus musculus non-coding RNA, oocyte clustered_small_RNA12951, complete sequence.                                              |
| 2.47 | Tagap1        | Mus musculus T cell activation GTPase activating protein 1 (Tagap1), mRNA.                                                    |
| 2.47 | Gm24775       | predicted gene, 24775 [gene_biotype:snRNA transcript_biotype:snRNA]                                                           |
| 2.47 | Rpl31-ps12    | Mus musculus ribosomal protein L31, pseudogene 1 2 (Rpl31-ps12), mRNA.                                                        |
| 2.47 | ---           | Non-coding transcript identified by Luo, et al.                                                                               |
| 2.47 | Mir1955       | Mus musculus microRNA 1955 (Mir1955), microRNA.                                                                               |
| 2.47 | Gm25430       | predicted gene, 25430                                                                                                         |
| 2.47 | A830039N20Rik | RIKEN cDNA A830039N20 gene                                                                                                    |
| 2.46 | ---           | Non-coding transcript identified by NONCODE: Antisense                                                                        |

|      |               |                                                                                                                                       |
|------|---------------|---------------------------------------------------------------------------------------------------------------------------------------|
| 2.46 | ---           | Non-coding transcript identified by NONCODE: Sense No Exonic                                                                          |
| 2.46 | Gm3272        | predicted pseudogene 3272                                                                                                             |
| 2.46 | Gm14038       | predicted gene 14038                                                                                                                  |
| 2.46 | ---           | Non-coding transcript identified by NONCODE: Sense No Exonic                                                                          |
| 2.46 | ---           | Non-coding transcript identified by NONCODE: Sense No Exonic                                                                          |
| 2.46 | ---           | Non-coding transcript identified by NONCODE: Linc                                                                                     |
| 2.45 | ---           | Non-coding transcript identified by NONCODE: Linc                                                                                     |
| 2.45 | Fam183b       | Mus musculus family with sequence similarity 183, member B (Fam183b), transcript variant 2, mRNA.                                     |
| 2.45 | ---           | Mus musculus non-coding RNA, oocyte_clustered_small_RNA9317, complete sequence.                                                       |
| 2.45 | LOC100861758  | PREDICTED: uncharacterized LOC100861758 (LOC100861758), miscRNA.                                                                      |
| 2.45 | Usmg5         | Mus musculus upregulated during skeletal muscle growth 5 (Usmg5), mRNA.                                                               |
| 2.45 | Gm15393       | predicted gene 15393 [gene_biotype:processed_pseudogene transcript_biotype:processed_pseudogene]                                      |
| 2.45 | ---           | Non-coding transcript identified by NONCODE: Sense No Exonic                                                                          |
| 2.45 | Qpctl         | Mus musculus glutaminyl-peptide cyclotransferase-like (Qpctl), mRNA.                                                                  |
| 2.45 | Hepacam2      | Mus musculus HEPACAM family member 2 (Hepacam2), mRNA.                                                                                |
| 2.45 | ---           | Non-coding transcript identified by NONCODE: Linc                                                                                     |
| 2.45 | ---           | Non-coding transcript identified by Luo, et al.                                                                                       |
| 2.44 | ---           | Non-coding transcript identified by Luo, et al.                                                                                       |
| 2.44 | Sfr1          | Mus musculus SWI5 dependent recombination repair 1 (Sfr1), mRNA.                                                                      |
| 2.44 | ---           | Non-coding transcript identified by NONCODE: Sense No Exonic                                                                          |
| 2.44 | ---           | Non-coding transcript identified by NONCODE: Sense No Exonic                                                                          |
| 2.44 | ---           | Non-coding transcript identified by NONCODE: Sense No Exonic                                                                          |
| 2.44 | Pdgfd         | Mus musculus platelet-derived growth factor, D polypeptide (Pdgfd), mRNA.                                                             |
| 2.43 | ---           | Non-coding transcript identified by NONCODE: Linc                                                                                     |
| 2.43 | ---           | Non-coding transcript identified by NONCODE: Sense No Exonic                                                                          |
| 2.43 | ---           | Non-coding transcript identified by NONCODE: Linc                                                                                     |
| 2.43 | ---           | Non-coding transcript identified by Luo, et al.                                                                                       |
| 2.43 | Gm19752       | PREDICTED: predicted gene, 19752 (Gm19752), miscRNA.                                                                                  |
| 2.43 | Mrpl42        | Mus musculus mitochondrial ribosomal protein L42 (Mrpl42), mRNA.                                                                      |
| 2.43 | Rpl17-ps5     | ribosomal protein L17, pseudogene 5                                                                                                   |
| 2.42 | Rpl29         | Mus musculus ribosomal protein L29, mRNA (cDNA clone MGC:6127 IMAGE:3590425), complete cds.                                           |
| 2.42 | ---           | Non-coding transcript identified by NONCODE: Linc                                                                                     |
| 2.42 | ---           | Non-coding transcript identified by NONCODE: Sense No Exonic                                                                          |
| 2.42 | Rps26-ps1     | ribosomal protein S26, pseudogene 1 [gene_biotype:protein_coding transcript_biotype:protein_coding]                                   |
| 2.42 | ---           | Non-coding transcript identified by NONCODE: Sense No Exonic                                                                          |
| 2.42 | ---           | Non-coding transcript identified by Luo, et al.                                                                                       |
| 2.42 | Gm3222        | predicted pseudogene 3222 [gene_biotype:processed_pseudogene transcript_biotype:processed_pseudogene]                                 |
| 2.42 | ---           | Non-coding transcript identified by NONCODE: Sense No Exonic                                                                          |
| 2.42 | ---           | Non-coding transcript identified by NONCODE: Sense No Exonic                                                                          |
| 2.42 | ---           | Non-coding transcript identified by NONCODE: Antisense                                                                                |
| 2.41 | ---           | Non-coding transcript identified by Luo, et al.                                                                                       |
| 2.41 | Dnajb9        | Mus musculus DnaJ (Hsp40) homolog, subfamily B, member 9 (Dnajb9), mRNA.                                                              |
| 2.41 | ---           | Non-coding transcript identified by NONCODE: Sense No Exonic                                                                          |
| 2.41 | ---           | Non-coding transcript identified by Luo, et al.                                                                                       |
| 2.41 | ---           | Non-coding transcript identified by NONCODE: Sense No Exonic                                                                          |
| 2.40 | ---           | Non-coding transcript identified by Luo, et al.                                                                                       |
| 2.40 | ---           | Non-coding transcript identified by NONCODE: Antisense                                                                                |
| 2.40 | Gm25033       | predicted gene, 25033 [gene_biotype:miRNA transcript_biotype:miRNA]                                                                   |
| 2.40 | Gm25323       | predicted gene, 25323 [gene_biotype:snRNA transcript_biotype:snRNA]                                                                   |
| 2.40 | Kcnma1        | Mus musculus potassium large conductance calcium-activated channel, subfamily M, alpha member 1 (Kcnma1), transcript variant 1, mRNA. |
| 2.40 | Gm2897        | predicted gene 2897 (Gm2897), transcript variant 1, mRNA.                                                                             |
| 2.40 | Tm4sf4        | Mus musculus transmembrane 4 superfamily member 4 (Tm4sf4), mRNA.                                                                     |
| 2.40 | ---           | Non-coding transcript identified by NONCODE: Sense No Exonic                                                                          |
| 2.40 | Gm20939       | Mus musculus predicted gene, 20939 (Gm20939), mRNA.                                                                                   |
| 2.40 | ---           | Non-coding transcript identified by NONCODE: Sense No Exonic                                                                          |
| 2.40 | 6820431F20Rik | RIKEN cDNA 6820431F20 gene, mRNA (cDNA clone MGC:67188 IMAGE:6825946), complete cds.                                                  |
| 2.40 | Gm14326       | Mus musculus predicted gene 14326 (Gm14326), transcript variant 1, mRNA.                                                              |
| 2.40 | ---           | Non-coding transcript identified by NONCODE: Sense No Exonic                                                                          |
| 2.40 | Efcab1        | Mus musculus EF hand calcium binding domain 1 (Efcab1), mRNA.                                                                         |
| 2.40 | Gm14308       | predicted gene 14308 (Gm14308), mRNA.                                                                                                 |
| 2.40 | ---           | Non-coding transcript identified by NONCODE: Sense No Exonic                                                                          |
| 2.40 | E230008O15Rik | PREDICTED: RIKEN cDNA E230008O15 gene (E230008O15Rik), miscRNA.                                                                       |
| 2.40 | Gm13805       | predicted gene 13805                                                                                                                  |
| 2.39 | ---           | Non-coding transcript identified by NONCODE: Sense No Exonic                                                                          |
| 2.39 | Slc7a8        | Mus musculus solute carrier family 7 (cationic amino acid transporter, y+ system), member 8 (Slc7a8), mRNA.                           |
| 2.39 | ---           | Non-coding transcript identified by NONCODE: Sense No Exonic                                                                          |
| 2.39 | Gm15487       | predicted gene 15487                                                                                                                  |
| 2.39 | ---           | Mus musculus piRNA piR-140471, complete sequence.                                                                                     |
| 2.39 | Gm11539       | predicted gene 11539 [gene_biotype:processed_pseudogene transcript_biotype:processed_pseudogene]                                      |
| 2.39 | Gm27731       | predicted gene, 27731 [gene_biotype:miRNA transcript_biotype:miRNA]                                                                   |
| 2.39 | ---           | Non-coding transcript identified by NONCODE: Sense No Exonic                                                                          |
| 2.39 | ---           | Non-coding transcript identified by NONCODE: Sense No Exonic                                                                          |
| 2.39 | ---           | Non-coding transcript identified by NONCODE: Antisense                                                                                |
| 2.39 | Mir7224       | Mus musculus microRNA 7224 (Mir7224), microRNA.                                                                                       |
| 2.39 | ---           | Non-coding transcript identified by NONCODE: Sense No Exonic                                                                          |
| 2.39 | ---           | Non-coding transcript identified by NONCODE: Linc                                                                                     |
| 2.39 | ---           | Non-coding transcript identified by NONCODE: Sense No Exonic                                                                          |

|      |               |                                                                                                                         |
|------|---------------|-------------------------------------------------------------------------------------------------------------------------|
| 2.39 | Gm11703       | predicted gene 11703                                                                                                    |
| 2.38 | ---           | Mus musculus non-coding RNA, oocyte_clustered_small_RNA10446, complete sequence.                                        |
| 2.38 | Gm23268       | predicted gene, 23268 [gene_biotype:miRNA transcript_biotype:miRNA]                                                     |
| 2.38 | ---           | Non-coding transcript identified by Luo, et al.                                                                         |
| 2.38 | Gm7618        | predicted pseudogene 7618 [gene_biotype:processed_pseudogene transcript_biotype:processed_pseudogene]                   |
| 2.38 | Rpn1          | Mus musculus ribophorin I (Rpn1), mRNA.                                                                                 |
| 2.38 | ---           | Non-coding transcript identified by NONCODE: Linc                                                                       |
| 2.38 | ---           | Non-coding transcript identified by NONCODE: Sense No Exonic                                                            |
| 2.37 | Gm10076       | predicted gene 10076 [gene_biotype:protein_coding transcript_biotype:protein_coding]                                    |
| 2.37 | ---           | Non-coding transcript identified by NONCODE: Sense No Exonic                                                            |
| 2.37 | ---           | Non-coding transcript identified by Luo, et al.                                                                         |
| 2.37 | ---           | Non-coding transcript identified by NONCODE: Sense No Exonic                                                            |
| 2.37 | Rpl39-ps      | ribosomal protein L39, pseudogene                                                                                       |
| 2.37 | ---           | Non-coding transcript identified by NONCODE: Linc                                                                       |
| 2.37 | Cdh8          | Mus musculus cadherin 8 (Cdh8), transcript variant 1, mRNA.                                                             |
| 2.36 | ---           | Non-coding transcript identified by NONCODE: Linc                                                                       |
| 2.36 | ---           | Non-coding transcript identified by Luo, et al.                                                                         |
| 2.36 | ---           | Non-coding transcript identified by NONCODE: Sense No Exonic                                                            |
| 2.36 | ---           | Non-coding transcript identified by NONCODE: Sense No Exonic                                                            |
| 2.36 | ---           | Non-coding transcript identified by NONCODE: Sense No Exonic                                                            |
| 2.36 | ---           | Non-coding transcript identified by Luo, et al.                                                                         |
| 2.36 | Gm5621        | predicted gene 5621                                                                                                     |
| 2.36 | ---           | Non-coding transcript identified by NONCODE: Sense No Exonic                                                            |
| 2.35 | Edem2         | Mus musculus ER degradation enhancer, mannosidase alpha-like 2 (Edem2), mRNA.                                           |
| 2.35 | Gm5451        | predicted gene 5451                                                                                                     |
| 2.35 | ---           | Non-coding transcript identified by NONCODE: Sense No Exonic                                                            |
| 2.35 | ---           | Non-coding transcript identified by NONCODE: Sense No Exonic                                                            |
| 2.35 | SMAD5-AS1 4   | SMAD5 antisense RNA 1 conserved region 4                                                                                |
| 2.35 | ---           | Non-coding transcript identified by NONCODE: Sense No Exonic                                                            |
| 2.35 | ---           | Non-coding transcript identified by NONCODE: Sense No Exonic                                                            |
| 2.35 | ---           | Non-coding transcript identified by NONCODE: Sense No Exonic                                                            |
| 2.35 | LOC101055953  | predicted gene 6434 [gene_biotype:protein_coding transcript_biotype:protein_coding]                                     |
| 2.35 | Mir103-2      | Mus musculus microRNA 103-2 (Mir103-2), microRNA.                                                                       |
| 2.35 | Rpl10a-ps1    | ribosomal protein L10A, pseudogene 1                                                                                    |
| 2.35 | ---           | Non-coding transcript identified by Luo, et al.                                                                         |
| 2.35 | Ighv1-77      | immunoglobulin heavy variable 1-77                                                                                      |
| 2.35 | Ap3d1         | Mus musculus adaptor-related protein complex 3, delta 1 subunit (Ap3d1), mRNA.                                          |
| 2.35 | Xdh           | Mus musculus xanthine dehydrogenase (Xdh), mRNA.                                                                        |
| 2.35 | Gm3696        | Mus musculus predicted gene 3696 (Gm3696), mRNA.                                                                        |
| 2.35 | Ndn           | Mus musculus necdin (Ndn), mRNA.                                                                                        |
| 2.35 | ---           | Non-coding transcript identified by NONCODE: Sense No Exonic                                                            |
| 2.34 | ---           | Non-coding transcript identified by NONCODE: Sense No Exonic                                                            |
| 2.34 | ---           | Non-coding transcript identified by NONCODE: Sense No Exonic                                                            |
| 2.34 | ---           | Non-coding transcript identified by NONCODE: Antisense                                                                  |
| 2.34 | ---           | Mus musculus non-coding RNA, oocyte_clustered_small_RNA4902, complete sequence.                                         |
| 2.34 | Mir703        | Mus musculus microRNA 703 (Mir703), microRNA.                                                                           |
| 2.34 | Gm3002        | Mus musculus predicted gene 3002 (Gm3002), non-coding RNA.                                                              |
| 2.34 | Pgf           | Mus musculus placental growth factor (Pgf), transcript variant 2, mRNA.                                                 |
| 2.34 | Clec2e        | Mus musculus C-type lectin domain family 2, member e (Clec2e), mRNA.                                                    |
| 2.34 | ---           | Non-coding transcript identified by NONCODE: Sense No Exonic                                                            |
| 2.34 | 4632427E13Rik | Mus musculus RIKEN cDNA 4632427E13 gene (4632427E13Rik), long non-coding RNA.                                           |
| 2.34 | ---           | Non-coding transcript identified by NONCODE: Linc                                                                       |
| 2.33 | ---           | Non-coding transcript identified by NONCODE: Sense No Exonic                                                            |
| 2.33 | ---           | Non-coding transcript identified by NONCODE: Sense No Exonic                                                            |
| 2.33 | ---           | Mus musculus non-coding RNA, oocyte_clustered_small_RNA11151, complete sequence.                                        |
| 2.33 | ---           | Mus musculus non-coding RNA, oocyte_clustered_small_RNA11151, complete sequence.                                        |
| 2.33 | ---           | Mus musculus non-coding RNA, oocyte_clustered_small_RNA11151, complete sequence.                                        |
| 2.33 | ---           | Mus musculus non-coding RNA, oocyte_clustered_small_RNA9920, complete sequence.                                         |
| 2.33 | ---           | Non-coding transcript identified by NONCODE: Sense No Exonic                                                            |
| 2.33 | ---           | Non-coding transcript identified by NONCODE: Sense No Exonic                                                            |
| 2.33 | Gm12179       | predicted gene 12179 [gene_biotype:processed_pseudogene transcript_biotype:processed_pseudogene]                        |
| 2.33 | Plpp3         | Mus musculus phosphatidic acid phosphatase type 2B (Ppap2b), mRNA.                                                      |
| 2.32 | ---           | Non-coding transcript identified by NONCODE: Linc                                                                       |
| 2.32 | Gm13841       | predicted gene 13841                                                                                                    |
| 2.32 | Olfm4         | Mus musculus olfactomedin 4 (Olfm4), mRNA.                                                                              |
| 2.32 | Gm9174        | predicted pseudogene 9174 [gene_biotype:processed_pseudogene transcript_biotype:processed_pseudogene]                   |
| 2.32 | Taf1b         | Mus musculus TATA box binding protein (Tbp)-associated factor, RNA polymerase I, B (Taf1b), transcript variant 1, mRNA. |
| 2.32 | Gm25879       | predicted gene, 25879 [gene_biotype:snRNA transcript_biotype:snRNA]                                                     |
| 2.32 | ---           | Non-coding transcript identified by Luo, et al.                                                                         |
| 2.32 | ---           | Non-coding transcript identified by NONCODE: Sense No Exonic                                                            |
| 2.32 | ---           | Mus musculus non-coding RNA, oocyte_clustered_small_RNA9366, complete sequence.                                         |
| 2.32 | P4hb          | Mus musculus prolyl 4-hydroxylase, beta polypeptide (P4hb), mRNA.                                                       |
| 2.31 | Mme           | Mus musculus membrane metallo endopeptidase (Mme), transcript variant 1, mRNA.                                          |
| 2.31 | ---           | Non-coding transcript identified by NONCODE: Antisense                                                                  |
| 2.31 | Gm3715        | predicted gene 3715 [gene_biotype:unprocessed_pseudogene transcript_biotype:unprocessed_pseudogene]                     |
| 2.31 | Gm13669       | predicted gene 13669 [gene_biotype:processed_pseudogene transcript_biotype:processed_pseudogene]                        |
| 2.31 | Gm3591        | predicted gene 3591                                                                                                     |

|      |               |                                                                                                                                  |
|------|---------------|----------------------------------------------------------------------------------------------------------------------------------|
| 2.31 | ---           | Non-coding transcript identified by NONCODE: Sense No Exonic                                                                     |
| 2.30 | Rpl35a-ps4    | ribosomal protein L35a (Rpl35a) pseudogene[ <i>gene_biotype:processed_pseudogene transcript_biotype:processed_pseudogene</i> ]   |
| 2.30 | Rpl35a-ps6    | ribosomal protein L35a (Rpl35a) pseudogene[ <i>gene_biotype:processed_pseudogene transcript_biotype:processed_pseudogene</i> ]   |
| 2.30 | Rpl35a-ps3    | ribosomal protein L35a (Rpl35a) pseudogene[ <i>gene_biotype:processed_pseudogene transcript_biotype:processed_pseudogene</i> ]   |
| 2.30 | Gm10177       | predicted gene 10177                                                                                                             |
| 2.30 | ---           | Non-coding transcript identified by NONCODE: Sense No Exonic                                                                     |
| 2.30 | Atp8b1        | Mus musculus ATPase, class I, type 8B, member 1 (Atp8b1), mRNA.                                                                  |
| 2.30 | Gm11385       | predicted gene 11385 [ <i>gene_biotype:unprocessed_pseudogene transcript_biotype:unprocessed_pseudogene</i> ]                    |
| 2.30 | ---           | Non-coding transcript identified by NONCODE: Sense No Exonic                                                                     |
| 2.30 | ---           | Non-coding transcript identified by NONCODE: Sense No Exonic                                                                     |
| 2.30 | ---           | Non-coding transcript identified by NONCODE: Sense No Exonic                                                                     |
| 2.30 | ---           | Non-coding transcript identified by NONCODE: Sense No Exonic                                                                     |
| 2.30 | Tmem50a       | Mus musculus transmembrane protein 50A (Tmem50a), mRNA.                                                                          |
| 2.30 | mt-Ta         | mitochondrially encoded tRNA alanine [ <i>gene_biotype:Mt_tRNA transcript_biotype:Mt_tRNA</i> ]                                  |
| 2.30 | 2410021H03Rik | Mus musculus RIKEN cDNA 2410021H03 gene (2410021H03Rik), long non-coding RNA.                                                    |
| 2.30 | Gm2974        | predicted gene 2974 [ <i>gene_biotype:protein_coding transcript_biotype:protein_coding</i> ]                                     |
| 2.30 | ---           | Non-coding transcript identified by NONCODE: Sense No Exonic                                                                     |
| 2.29 | ---           | Non-coding transcript identified by NONCODE: Sense No Exonic                                                                     |
| 2.29 | Tmem63c       | Mus musculus transmembrane protein 63c (Tmem63c), mRNA.                                                                          |
| 2.29 | ---           | Non-coding transcript identified by NONCODE: Linc                                                                                |
| 2.29 | Cyp2c66       | Mus musculus cytochrome P450, family 2, subfamily c, polypeptide 66 (Cyp2c66), mRNA.                                             |
| 2.29 | ---           | Non-coding transcript identified by NONCODE: Sense No Exonic                                                                     |
| 2.29 | Gm12105       | predicted gene 12105 [ <i>gene_biotype:processed_pseudogene transcript_biotype:processed_pseudogene</i> ]                        |
| 2.29 | Cd164         | Mus musculus CD164 antigen (Cd164), mRNA.                                                                                        |
| 2.29 | ---           | Non-coding transcript identified by NONCODE: Sense No Exonic                                                                     |
| 2.29 | 2610042L04Rik | RIKEN cDNA 2610042L04 gene [ <i>gene_biotype:protein_coding transcript_biotype:protein_coding</i> ]                              |
| 2.29 | 1700110C19Rik | Mus musculus RIKEN cDNA 1700110C19 gene (1700110C19Rik), long non-coding RNA.                                                    |
| 2.28 | ---           | Non-coding transcript identified by NONCODE: Sense No Exonic                                                                     |
| 2.28 | Gm22032       | predicted gene, 22032 [ <i>gene_biotype:miRNA transcript_biotype:miRNA</i> ]                                                     |
| 2.28 | Prom1         | Mus musculus prominin 1 (Prom1), transcript variant 2, mRNA.                                                                     |
| 2.28 | Clec2j        | C-type lectin domain family 2, member J [ <i>gene_biotype:unprocessed_pseudogene transcript_biotype:unprocessed_pseudogene</i> ] |
| 2.28 | ---           | Non-coding transcript identified by Luo, et al.                                                                                  |
| 2.28 | Gm10155       | predicted gene 10155 [ <i>gene_biotype:processed_pseudogene transcript_biotype:processed_pseudogene</i> ]                        |
| 2.28 | Gm766         | Mus musculus predicted gene 766 (Gm766), mRNA.                                                                                   |
| 2.28 | ---           | Non-coding transcript identified by NONCODE: Sense No Exonic                                                                     |
| 2.28 | Gabarapl1     | Mus musculus gamma-aminobutyric acid (GABA) A receptor-associated protein-like 1 (Gabarapl1), mRNA.                              |
| 2.28 | ---           | Non-coding transcript identified by NONCODE: Sense No Exonic                                                                     |
| 2.28 | ---           | Non-coding transcript identified by NONCODE: Sense No Exonic                                                                     |
| 2.28 | Gm16199       | predicted gene 16199 [ <i>gene_biotype:processed_pseudogene transcript_biotype:processed_pseudogene</i> ]                        |
| 2.28 | ---           | Non-coding transcript identified by Luo, et al.                                                                                  |
| 2.28 | ---           | Non-coding transcript identified by NONCODE: Linc                                                                                |
| 2.28 | ---           | Non-coding transcript identified by NONCODE: Sense No Exonic                                                                     |
| 2.27 | Atp2a3        | Mus musculus ATPase, Ca++ transporting, ubiquitous (Atp2a3), transcript variant 1, mRNA.                                         |
| 2.27 | ---           | Non-coding transcript identified by Luo, et al.                                                                                  |
| 2.27 | ---           | Non-coding transcript identified by NONCODE: Antisense                                                                           |
| 2.27 | Fam174a       | Mus musculus family with sequence similarity 174, member A (Fam174a), mRNA.                                                      |
| 2.27 | Gm19743       | PREDICTED: predicted gene, 19743 (Gm19743), miscRNA.                                                                             |
| 2.27 | ---           | Non-coding transcript identified by NONCODE: Sense No Exonic                                                                     |
| 2.27 | ---           | Non-coding transcript identified by NONCODE: Sense No Exonic                                                                     |
| 2.27 | Rpl4          | Mus musculus ribosomal protein L4 (Rpl4), mRNA.                                                                                  |
| 2.27 | ---           | Non-coding transcript identified by Luo, et al.                                                                                  |
| 2.27 | ---           | Non-coding transcript identified by Luo, et al.                                                                                  |
| 2.27 | ---           | Non-coding transcript identified by Luo, et al.                                                                                  |
| 2.27 | Ggt1          | Mus musculus gamma-glutamyltransferase 1 (Ggt1), transcript variant 1, mRNA.                                                     |
| 2.26 | ---           | Non-coding transcript identified by NONCODE: Sense No Exonic                                                                     |
| 2.26 | ---           | Non-coding transcript identified by NONCODE: Sense No Exonic                                                                     |
| 2.26 | ---           | Non-coding transcript identified by NONCODE: Sense No Exonic                                                                     |
| 2.26 | ---           | Non-coding transcript identified by NONCODE: Linc                                                                                |
| 2.26 | Dcx           | Mus musculus doublecortin (Dcx), transcript variant 1, mRNA.                                                                     |
| 2.26 | Gm2897        | predicted gene 2897 (Gm2897), transcript variant 1, mRNA.                                                                        |
| 2.26 | ---           | Non-coding transcript identified by NONCODE: Sense No Exonic                                                                     |
| 2.26 | ---           | Non-coding transcript identified by NONCODE: Sense No Exonic                                                                     |
| 2.26 | Vmn1r-ps60    | vomer nasal 1 receptor, pseudogene 60[ <i>gene_biotype:unprocessed_pseudogene transcript_biotype:unprocessed_pseudogene</i> ]    |
| 2.25 | ---           | Non-coding transcript identified by NONCODE: Sense No Exonic                                                                     |
| 2.25 | Gm14308       | Mus musculus predicted gene 14308 (Gm14308), mRNA.                                                                               |
| 2.25 | ---           | Non-coding transcript identified by NONCODE: Linc                                                                                |
| 2.25 | A230057D06Rik | Mus musculus RIKEN cDNA A230057D06 gene (A230057D06Rik), long non-coding RNA.                                                    |
| 2.25 | ---           | Non-coding transcript identified by NONCODE: Sense No Exonic                                                                     |
| 2.25 | Gm25472       | predicted gene, 25472 [ <i>gene_biotype:miRNA transcript_biotype:miRNA</i> ]                                                     |
| 2.25 | ---           | Non-coding transcript identified by Luo, et al.                                                                                  |
| 2.25 | ---           | Non-coding transcript identified by NONCODE: Sense No Exonic                                                                     |
| 2.25 | ---           | Non-coding transcript identified by NONCODE: Sense No Exonic                                                                     |
| 2.25 | Gm12944       | predicted gene 12944 [ <i>gene_biotype:processed_pseudogene transcript_biotype:processed_pseudogene</i> ]                        |
| 2.25 | ---           | Non-coding transcript identified by Luo, et al.                                                                                  |
| 2.25 | Gm12104       | predicted gene 12104 [ <i>gene_biotype:processed_pseudogene transcript_biotype:processed_pseudogene</i> ]                        |
| 2.25 | LOC100862361  | PREDICTED: 60S ribosomal protein L23a-like (LOC100862361), mRNA.                                                                 |
| 2.24 | Prss53        | Mus musculus protease, serine 53 (Prss53), mRNA.                                                                                 |

|      |           |                                                                                                                                |
|------|-----------|--------------------------------------------------------------------------------------------------------------------------------|
| 2.24 | ---       | Non-coding transcript identified by NONCODE: Sense No Exonic                                                                   |
| 2.24 | Gm12928   | predicted gene 12928 [gene_biotype:processed_pseudogene transcript_biotype:processed_pseudogene]                               |
| 2.24 | ---       | Non-coding transcript identified by NONCODE: Sense No Exonic                                                                   |
| 2.24 | ---       | Non-coding transcript identified by NONCODE: Sense No Exonic                                                                   |
| 2.24 | ---       | Non-coding transcript identified by Luo, et al.                                                                                |
| 2.23 | Olf1312   | Mus musculus olfactory receptor 1312 (Olf1312), mRNA.                                                                          |
| 2.23 | Gm14399   | predicted gene 14399                                                                                                           |
| 2.23 | ---       | Non-coding transcript identified by NONCODE: Sense No Exonic                                                                   |
| 2.23 | ---       | Mus musculus cDNA, clone:Y1G0149L17, strand:unspecified.                                                                       |
| 2.23 | ---       | Non-coding transcript identified by NONCODE: Sense No Exonic                                                                   |
| 2.23 | ---       | Non-coding transcript identified by NONCODE: Sense No Exonic                                                                   |
| 2.23 | ---       | Non-coding transcript identified by NONCODE: Antisense                                                                         |
| 2.23 | Hsd17b11  | Mus musculus hydroxysteroid (17-beta) dehydrogenase 11 (Hsd17b11), mRNA.                                                       |
| 2.23 | ---       | Non-coding transcript identified by NONCODE: Sense No Exonic                                                                   |
| 2.22 | Ptprn2    | Mus musculus protein tyrosine phosphatase, receptor type, N polypeptide 2 (Ptprn2), mRNA.                                      |
| 2.22 | Gm4540    | predicted gene 4540 [gene_biotype:processed_pseudogene transcript_biotype:processed_pseudogene]                                |
| 2.22 | ---       | Non-coding transcript identified by NONCODE: Sense No Exonic                                                                   |
| 2.22 | ---       | Non-coding transcript identified by NONCODE: Sense No Exonic                                                                   |
| 2.22 | ---       | Non-coding transcript identified by NONCODE: Sense No Exonic                                                                   |
| 2.22 | Jam2      | Mus musculus junction adhesion molecule 2 (Jam2), mRNA.                                                                        |
| 2.22 | Gm24234   | predicted gene, 24234 [gene_biotype:snRNA transcript_biotype:snRNA]                                                            |
| 2.22 | ---       | Non-coding transcript identified by NONCODE: Linc                                                                              |
| 2.22 | ---       | RecName: Full=LINE-1 retrotransposable element ORF2 protein; RecName: Full=Endonuclease;                                       |
| 2.22 | ---       | Non-coding transcript identified by NONCODE: Sense No Exonic                                                                   |
| 2.22 | ---       | Non-coding transcript identified by Luo, et al.                                                                                |
| 2.22 | ---       | Non-coding transcript identified by NONCODE: Sense No Exonic                                                                   |
| 2.22 | ---       | Non-coding transcript identified by NONCODE: Sense No Exonic                                                                   |
| 2.21 | ---       | Non-coding transcript identified by NONCODE: Sense No Exonic                                                                   |
| 2.21 | ---       | Non-coding transcript identified by NONCODE: Sense No Exonic                                                                   |
| 2.21 | Gm10012   | predicted pseudogene 10012 [gene_biotype:transcribed_processed_pseudogene transcript_biotype:transcribed_processed_pseudogene] |
| 2.21 | Gm20236   | PREDICTED: predicted gene, 20236 (Gm20236), miscRNA.                                                                           |
| 2.21 | ---       | Non-coding transcript identified by NONCODE: Sense No Exonic                                                                   |
| 2.21 | Psap      | Mus musculus prosaposin (Psap), transcript variant 1, mRNA.                                                                    |
| 2.21 | Gm21833   | predicted gene, 21833 [gene_biotype:protein_coding transcript_biotype:protein_coding]                                          |
| 2.21 | ---       | Non-coding transcript identified by NONCODE: Linc                                                                              |
| 2.21 | ---       | Non-coding transcript identified by NONCODE: Linc                                                                              |
| 2.21 | ---       | Non-coding transcript identified by NONCODE: Linc                                                                              |
| 2.21 | Rpl9-ps6  | ribosomal protein L9, pseudogene 6 [gene_biotype:protein_coding transcript_biotype:protein_coding]                             |
| 2.21 | Gm23517   | predicted gene, 23517 [gene_biotype:snRNA transcript_biotype:snRNA]                                                            |
| 2.20 | Kcnk16    | Mus musculus potassium channel, subfamily K, member 16 (Kcnk16), mRNA.                                                         |
| 2.20 | ---       | Non-coding transcript identified by Luo, et al.                                                                                |
| 2.20 | ---       | Non-coding transcript identified by NONCODE: Sense No Exonic                                                                   |
| 2.20 | Gm6568    | Mus musculus predicted pseudogene 6568 (Gm6568), non-coding RNA.                                                               |
| 2.20 | Smim11    | Mus musculus small integral membrane protein 11 (Smim11), mRNA.                                                                |
| 2.20 | ---       | Non-coding transcript identified by NONCODE: Linc                                                                              |
| 2.20 | Emb       | Mus musculus embigin (Emb), mRNA.                                                                                              |
| 2.20 | ---       | Non-coding transcript identified by NONCODE: Sense No Exonic                                                                   |
| 2.20 | Gm20186   | PREDICTED: predicted gene, 20186 (Gm20186), miscRNA.                                                                           |
| 2.20 | ---       | Non-coding transcript identified by Luo, et al.                                                                                |
| 2.20 | Gm12370   | predicted gene 12370 [gene_biotype:processed_pseudogene transcript_biotype:processed_pseudogene]                               |
| 2.20 | Gm5620    | predicted gene 5620                                                                                                            |
| 2.20 | Hadh      | Mus musculus hydroxyacyl-Coenzyme A dehydrogenase (Hadh), mRNA.                                                                |
| 2.19 | ---       | Non-coding transcript identified by Luo, et al.                                                                                |
| 2.19 | Gm3383    | predicted gene 3383 (Gm3383), mRNA.                                                                                            |
| 2.19 | ---       | Non-coding transcript identified by NONCODE: Sense No Exonic                                                                   |
| 2.19 | ---       | Non-coding transcript identified by NONCODE: Sense No Exonic                                                                   |
| 2.19 | Gm6433    | predicted gene 6433 [gene_biotype:processed_pseudogene transcript_biotype:processed_pseudogene]                                |
| 2.19 | ---       | Non-coding transcript identified by NONCODE: Sense No Exonic                                                                   |
| 2.19 | Gm5612    | predicted gene 5612 [gene_biotype:protein_coding transcript_biotype:protein_coding]                                            |
| 2.19 | Mcee      | Mus musculus methylmalonyl CoA epimerase (Mcee), mRNA.                                                                         |
| 2.19 | ---       | Non-coding transcript identified by NONCODE: Sense No Exonic                                                                   |
| 2.19 | Gm6285    | predicted gene 6285 [gene_biotype:processed_pseudogene transcript_biotype:processed_pseudogene]                                |
| 2.19 | ---       | Non-coding transcript identified by NONCODE: Sense No Exonic                                                                   |
| 2.19 | Gm2399    | predicted gene 2399 [gene_biotype:protein_coding transcript_biotype:protein_coding]                                            |
| 2.19 | Mir6481   | Mus musculus microRNA 6481 (Mir6481), microRNA.                                                                                |
| 2.19 | ---       | Non-coding transcript identified by NONCODE: Sense No Exonic                                                                   |
| 2.19 | ---       | Non-coding transcript identified by Luo, et al.                                                                                |
| 2.19 | Cyp2c65   | Mus musculus cytochrome P450, family 2, subfamily c, polypeptide 65 (Cyp2c65), mRNA.                                           |
| 2.19 | Gm22582   | predicted gene, 22582 [gene_biotype:miRNA transcript_biotype:miRNA]                                                            |
| 2.19 | Gm23393   | predicted gene, 23393 [gene_biotype:miRNA transcript_biotype:miRNA]                                                            |
| 2.19 | Gpd1      | Mus musculus glycerol-3-phosphate dehydrogenase 1 (soluble) (Gpd1), mRNA.                                                      |
| 2.18 | Gm23334   | predicted gene, 23334 [gene_biotype:miRNA transcript_biotype:miRNA]                                                            |
| 2.18 | H2-Aa     | Mus musculus histocompatibility 2, class II antigen A, alpha (H2-Aa), mRNA.                                                    |
| 2.18 | ---       | Non-coding transcript identified by NONCODE: Antisense                                                                         |
| 2.18 | Gm24560   | predicted gene, 24560                                                                                                          |
| 2.18 | adapt33_2 | Adaptive response 33 conserved region 2                                                                                        |
| 2.18 | Gm10128   | predicted gene 10128 [gene_biotype:protein_coding transcript_biotype:protein_coding]                                           |

|      |               |                                                                                                                                 |
|------|---------------|---------------------------------------------------------------------------------------------------------------------------------|
| 2.18 | ---           | Non-coding transcript identified by NONCODE: Sense No Exonic                                                                    |
| 2.18 | Gm16128       | predicted gene 16128 [gene_biotype:processed_pseudogene transcript_biotype:processed_pseudogene]                                |
| 2.18 | ---           | Non-coding transcript identified by NONCODE: Linc                                                                               |
| 2.18 | ---           | Non-coding transcript identified by NONCODE: Sense No Exonic                                                                    |
| 2.18 | 2610005L07Rik | Mus musculus RIKEN cDNA 2610005L07 gene (2610005L07Rik), non-coding RNA.                                                        |
| 2.18 | Skap2         | Mus musculus src family associated phosphoprotein 2 (Skap2), mRNA.                                                              |
| 2.18 | ---           | Non-coding transcript identified by NONCODE: Sense No Exonic                                                                    |
| 2.18 | ---           | Non-coding transcript identified by NONCODE: Linc                                                                               |
| 2.17 | ---           | Non-coding transcript identified by NONCODE: Sense No Exonic                                                                    |
| 2.17 | Pik3r1        | Mus musculus phosphatidylinositol 3-kinase, regulatory subunit, polypeptide 1 (p85 alpha) (Pik3r1), transcript variant 1, mRNA. |
| 2.17 | Syt13         | Mus musculus synaptotagmin XIII (Syt13), mRNA.                                                                                  |
| 2.17 | ---           | Non-coding transcript identified by NONCODE: Sense No Exonic                                                                    |
| 2.17 | Gm12571       | predicted gene 12571 [gene_biotype:processed_pseudogene transcript_biotype:processed_pseudogene]                                |
| 2.17 | ---           | Non-coding transcript identified by NONCODE: Antisense                                                                          |
| 2.17 | Rpl3-ps1      | ribosomal protein L3, pseudogene 1                                                                                              |
| 2.17 | Gm6611        | predicted gene 6611 [gene_biotype:processed_pseudogene transcript_biotype:processed_pseudogene]                                 |
| 2.17 | 4930583P06Rik | Mus musculus RIKEN cDNA 4930583P06 gene (4930583P06Rik), long non-coding RNA.                                                   |
| 2.17 | Mir453        | Mus musculus microRNA 453 (Mir453), microRNA.                                                                                   |
| 2.17 | Gm14325       | Mus musculus predicted gene 14325 (Gm14325), mRNA.                                                                              |
| 2.17 | Ubi3          | Mus musculus ubiquitin-like 3 (Ubi3), mRNA.                                                                                     |
| 2.17 | ---           | Non-coding transcript identified by NONCODE: Sense No Exonic                                                                    |
| 2.17 | ---           | Non-coding transcript identified by NONCODE: Sense No Exonic                                                                    |
| 2.17 | Etohi1        | Mus musculus ethanol induced 1 (Etohi1), transcript variant 1, mRNA.                                                            |
| 2.16 | ---           | Non-coding transcript identified by NONCODE: Sense No Exonic                                                                    |
| 2.16 | Gucy2c        | Mus musculus guanylate cyclase 2c (Gucy2c), transcript variant 1, mRNA.                                                         |
| 2.16 | ---           | Non-coding transcript identified by NONCODE: Sense No Exonic                                                                    |
| 2.16 | ---           | Non-coding transcript identified by NONCODE: Sense No Exonic                                                                    |
| 2.16 | ---           | Non-coding transcript identified by NONCODE: Sense No Exonic                                                                    |
| 2.16 | ---           | Non-coding transcript identified by NONCODE: Sense No Exonic                                                                    |
| 2.16 | Gm2897        | predicted gene 2897 (Gm2897), transcript variant 1, mRNA.                                                                       |
| 2.16 | Tmem95        | Mus musculus transmembrane protein 95 (Tmem95), mRNA.                                                                           |
| 2.16 | Armxc3        | Mus musculus armadillo repeat containing, X-linked 3, mRNA (cDNA clone MGC:19426 IMAGE:3490748), complete cds.                  |
| 2.16 | ---           | Non-coding transcript identified by NONCODE: Sense No Exonic                                                                    |
| 2.16 | ---           | Non-coding transcript identified by NONCODE: Sense No Exonic                                                                    |
| 2.16 | Gm22310       | predicted gene, 22310 [gene_biotype:snoRNA transcript_biotype:snoRNA]                                                           |
| 2.15 | Cflar         | Mus musculus CASP8 and FADD-like apoptosis regulator (Cflar), transcript variant 3, mRNA.                                       |
| 2.15 | ---           | Non-coding transcript identified by NONCODE: Antisense                                                                          |
| 2.15 | ---           | Mus musculus piRNA piR-108193, complete sequence.                                                                               |
| 2.15 | ---           | Non-coding transcript identified by NONCODE: Sense No Exonic                                                                    |
| 2.15 | ---           | Non-coding transcript identified by NONCODE: Sense No Exonic                                                                    |
| 2.15 | Gm20712       | predicted gene 20712 [gene_biotype:sense_overlapping transcript_biotype:sense_overlapping]                                      |
| 2.15 | Atp6ap2       | Mus musculus ATPase, H+ transporting, lysosomal accessory protein 2 (Atp6ap2), mRNA.                                            |
| 2.15 | ---           | Mus musculus piRNA piR-17076, complete sequence.                                                                                |
| 2.14 | Gm10163       | predicted pseudogene 10163                                                                                                      |
| 2.14 | ---           | Non-coding transcript identified by NONCODE: Sense No Exonic                                                                    |
| 2.14 | ---           | Non-coding transcript identified by NONCODE: Sense No Exonic                                                                    |
| 2.14 | Gm17420       | predicted gene, 17420 [gene_biotype:pseudogene transcript_biotype:pseudogene]                                                   |
| 2.14 | ---           | Non-coding transcript identified by NONCODE: Linc                                                                               |
| 2.14 | ---           | Non-coding transcript identified by Luo, et al.                                                                                 |
| 2.14 | Wbp5          | Mus musculus WW domain binding protein 5 (Wbp5), mRNA.                                                                          |
| 2.14 | ---           | Non-coding transcript identified by NONCODE: Sense No Exonic                                                                    |
| 2.14 | ---           | Non-coding transcript identified by NONCODE: Sense No Exonic                                                                    |
| 2.14 | ---           | Non-coding transcript identified by NONCODE: Sense No Exonic                                                                    |
| 2.14 | Ror1          | Mus musculus receptor tyrosine kinase-like orphan receptor 1 (Ror1), transcript variant 1, mRNA.                                |
| 2.14 | ---           | Non-coding transcript identified by NONCODE: Sense No Exonic                                                                    |
| 2.14 | Gm9818        | predicted gene 9818 [gene_biotype:pseudogene transcript_biotype:pseudogene]                                                     |
| 2.14 | Gm17074       | predicted gene 17074 [gene_biotype:processed_pseudogene transcript_biotype:processed_pseudogene]                                |
| 2.13 | Zfp433        | RIKEN cDNA 1700123A16 gene (Zfp433), mRNA.                                                                                      |
| 2.13 | Gm6136        | predicted pseudogene 6136                                                                                                       |
| 2.13 | ---           | Non-coding transcript identified by NONCODE: Linc                                                                               |
| 2.13 | ---           | Non-coding transcript identified by NONCODE: Linc                                                                               |
| 2.13 | ---           | Non-coding transcript identified by NONCODE: Linc                                                                               |
| 2.13 | ---           | Non-coding transcript identified by NONCODE: Sense No Exonic                                                                    |
| 2.13 | ---           | Mus musculus non-coding RNA, oocyte_piRNA775, complete sequence.                                                                |
| 2.13 | ---           | Mus musculus non-coding RNA, oocyte_piRNA1772, complete sequence.                                                               |
| 2.13 | Mir344-2      | Mus musculus microRNA 344-2 (Mir344-2), microRNA.                                                                               |
| 2.13 | ---           | Non-coding transcript identified by NONCODE: Sense No Exonic                                                                    |
| 2.13 | Rplp1         | Mus musculus ribosomal protein, large, P1 (Rplp1), mRNA.                                                                        |
| 2.13 | Gm24568       | predicted gene, 24568 [gene_biotype:snoRNA transcript_biotype:snoRNA]                                                           |
| 2.13 | ---           | Non-coding transcript identified by NONCODE: Sense No Exonic                                                                    |
| 2.13 | ---           | Non-coding transcript identified by NONCODE: Antisense                                                                          |
| 2.13 | Rp9           | Mus musculus retinitis pigmentosa 9 (human) (Rp9), mRNA.                                                                        |
| 2.13 | Cyp2c68       | Mus musculus cytochrome P450, family 2, subfamily c, polypeptide 68 (Cyp2c68), mRNA.                                            |
| 2.12 | Mir344        | Mus musculus microRNA 344 (Mir344), microRNA.                                                                                   |
| 2.12 | Tceb1         | Mus musculus transcription elongation factor B (SIII), polypeptide 1 (Tceb1), transcript variant 2, mRNA.                       |
| 2.12 | ---           | Non-coding transcript identified by NONCODE: Sense No Exonic                                                                    |
| 2.12 | Slc13a1       | Mus musculus solute carrier family 13 (sodium/sulfate symporters), member 1 (Slc13a1), mRNA.                                    |



|      |               |                                                                                                               |
|------|---------------|---------------------------------------------------------------------------------------------------------------|
| 2.12 | Sez6l2        | Mus musculus seizure related 6 homolog like 2 (Sez6l2), transcript variant 2, mRNA.                           |
| 2.12 | ---           | Non-coding transcript identified by NONCODE: Antisense                                                        |
| 2.12 | 42993         | Mus musculus selenoprotein (Sep15), mRNA.                                                                     |
| 2.12 | ---           | Non-coding transcript identified by NONCODE: Sense No Exonic                                                  |
| 2.12 | Lipo2         | lipase, member O2                                                                                             |
| 2.12 | ---           | Non-coding transcript identified by NONCODE: Sense No Exonic                                                  |
| 2.12 | ---           | Non-coding transcript identified by Luo, et al.                                                               |
| 2.12 | ---           | Non-coding transcript identified by NONCODE: Sense No Exonic                                                  |
| 2.12 | Fam45a        | Mus musculus family with sequence similarity 45, member A (Fam45a), transcript variant 2, mRNA.               |
| 2.12 | ---           | Non-coding transcript identified by NONCODE: Sense No Exonic                                                  |
| 2.12 | B2m           | Mus musculus beta-2 microglobulin (B2m), mRNA.                                                                |
| 2.12 | ---           | Non-coding transcript identified by NONCODE: Sense No Exonic                                                  |
| 2.12 | Gm9824        | predicted pseudogene 9824 [gene_biotype:processed_pseudogene transcript_biotype:processed_pseudogene]         |
| 2.11 | ---           | Non-coding transcript identified by NONCODE: Sense No Exonic                                                  |
| 2.11 | Zdhhc15       | Mus musculus zinc finger, DHHC domain containing 15 (Zdhhc15), mRNA.                                          |
| 2.11 | ---           | Non-coding transcript identified by NONCODE: Linc                                                             |
| 2.11 | Atp1a1        | Mus musculus ATPase, Na+/K+ transporting, alpha 1 polypeptide (Atp1a1), mRNA.                                 |
| 2.11 | ---           | Non-coding transcript identified by NONCODE: Sense No Exonic                                                  |
| 2.11 | Cadps         | Mus musculus Ca2+-dependent secretion activator (Cadps), transcript variant 2, mRNA.                          |
| 2.11 | ---           | Non-coding transcript identified by NONCODE: Sense No Exonic                                                  |
| 2.11 | Rpl28-ps3     | ribosomal protein L28, pseudogene 3                                                                           |
| 2.11 | ---           | Non-coding transcript identified by NONCODE: Sense No Exonic                                                  |
| 2.11 | Gm15427       | predicted pseudogene 15427                                                                                    |
| 2.11 | Gnptg         | Mus musculus N-acetylglucosamine-1-phosphotransferase, gamma subunit (Gnptg), mRNA.                           |
| 2.10 | Dnajc3        | Mus musculus DnaJ (Hsp40) homolog, subfamily C, member 3 (Dnajc3), mRNA.                                      |
| 2.10 | ---           | Non-coding transcript identified by NONCODE: Antisense                                                        |
| 2.10 | Cdhr1         | Mus musculus cadherin-related family member 1 (Cdhr1), mRNA.                                                  |
| 2.10 | Gm11229       | predicted gene 11229 [gene_biotype:processed_pseudogene transcript_biotype:processed_pseudogene]              |
| 2.10 | ---           | Non-coding transcript identified by NONCODE: Sense No Exonic                                                  |
| 2.10 | ---           | Non-coding transcript identified by NONCODE: Sense No Exonic                                                  |
| 2.10 | ---           | Non-coding transcript identified by NONCODE: Antisense,Sense No Exonic                                        |
| 2.10 | ---           | Non-coding transcript identified by NONCODE: Linc                                                             |
| 2.10 | ---           | Non-coding transcript identified by NONCODE: Sense No Exonic                                                  |
| 2.10 | Gm10340       | predicted gene 10340 [gene_biotype:protein_coding transcript_biotype:protein_coding]                          |
| 2.10 | ---           | Non-coding transcript identified by NONCODE: Sense No Exonic                                                  |
| 2.10 | ---           | Non-coding transcript identified by NONCODE: Sense No Exonic                                                  |
| 2.10 | Acaa2         | Mus musculus acetyl-Coenzyme A acyltransferase 2 (mitochondrial 3-oxoacyl-Coenzyme A thiolase) (Acaa2), mRNA. |
| 2.10 | ---           | Non-coding transcript identified by NONCODE: Sense No Exonic                                                  |
| 2.10 | ---           | Non-coding transcript identified by NONCODE: Sense No Exonic                                                  |
| 2.09 | ---           | Non-coding transcript identified by NONCODE: Sense No Exonic                                                  |
| 2.09 | ---           | Non-coding transcript identified by NONCODE: Sense No Exonic                                                  |
| 2.09 | Hsp90b1       | Mus musculus heat shock protein 90, beta (Grp94), member 1 (Hsp90b1), mRNA.                                   |
| 2.09 | ---           | Non-coding transcript identified by NONCODE: Sense No Exonic                                                  |
| 2.09 | ---           | Mus musculus RNA for germline small RNA gsRNA68, complete sequence.                                           |
| 2.09 | ---           | Non-coding transcript identified by NONCODE: Sense No Exonic                                                  |
| 2.09 | 1500011B03Rik | Mus musculus RIKEN cDNA 1500011B03 gene (1500011B03Rik), transcript variant 1, long non-coding RNA.           |
| 2.09 | ---           | Non-coding transcript identified by NONCODE: Sense No Exonic                                                  |
| 2.09 | Leap2         | Mus musculus liver-expressed antimicrobial peptide 2 (Leap2), mRNA.                                           |
| 2.09 | Gm5415        | Mus musculus predicted gene 5415 (Gm5415), mRNA.                                                              |
| 2.09 | Olf710        | Mus musculus olfactory receptor 710 (Olf710), mRNA.                                                           |
| 2.09 | ---           | Non-coding transcript identified by NONCODE: Sense No Exonic                                                  |
| 2.09 | ---           | Non-coding transcript identified by NONCODE: Linc                                                             |
| 2.09 | Gm6142        | predicted pseudogene 6142 [gene_biotype:processed_pseudogene transcript_biotype:processed_pseudogene]         |
| 2.09 | ---           | Non-coding transcript identified by Luo, et al.                                                               |
| 2.09 | ---           | Non-coding transcript identified by NONCODE: Sense No Exonic                                                  |
| 2.09 | ---           | Non-coding transcript identified by NONCODE: Sense No Exonic                                                  |
| 2.09 | ---           | Non-coding transcript identified by NONCODE: Sense No Exonic                                                  |
| 2.09 | ---           | Non-coding transcript identified by NONCODE: Sense No Exonic                                                  |
| 2.09 | Gm10736       | predicted gene 10736                                                                                          |
| 2.09 | Gm12846       | predicted gene 12846 [gene_biotype:processed_pseudogene transcript_biotype:processed_pseudogene]              |
| 2.08 | Cd63          | Mus musculus CD63 antigen (Cd63), transcript variant 1, mRNA.                                                 |
| 2.08 | Arl9          | Mus musculus ADP-ribosylation factor-like 9 (Arl9), mRNA.                                                     |
| 2.08 | ---           | Non-coding transcript identified by NONCODE: Sense No Exonic                                                  |
| 2.08 | ---           | Non-coding transcript identified by NONCODE: Linc                                                             |
| 2.08 | ---           | Non-coding transcript identified by Luo, et al.                                                               |
| 2.08 | ---           | Non-coding transcript identified by NONCODE: Sense No Exonic                                                  |
| 2.08 | ---           | Non-coding transcript identified by NONCODE: Sense No Exonic                                                  |
| 2.08 | ---           | Non-coding transcript identified by NONCODE: Sense No Exonic                                                  |
| 2.08 | ---           | Non-coding transcript identified by NONCODE: Sense No Exonic                                                  |
| 2.08 | ---           | Non-coding transcript identified by NONCODE: Sense No Exonic                                                  |
| 2.08 | ---           | Non-coding transcript identified by NONCODE: Sense No Exonic                                                  |
| 2.08 | Rnaset2a      | Mus musculus ribonuclease T2A (Rnaset2a), mRNA.                                                               |
| 2.08 | ---           | Non-coding transcript identified by NONCODE: Sense No Exonic                                                  |
| 2.08 | Gm8756        | predicted gene 8756 [gene_biotype:processed_pseudogene transcript_biotype:processed_pseudogene]               |
| 2.07 | ---           | Non-coding transcript identified by NONCODE: Linc                                                             |
| 2.07 | ---           | Non-coding transcript identified by NONCODE: Sense No Exonic                                                  |
| 2.07 | ---           | Mus musculus RNA for germline small RNA gsRNA168, complete sequence.                                          |

|      |               |                                                                                                                      |
|------|---------------|----------------------------------------------------------------------------------------------------------------------|
| 2.07 | ---           | Non-coding transcript identified by NONCODE: Sense No Exonic                                                         |
| 2.07 | Scgn          | Mus musculus secretagoin, EF-hand calcium binding protein (Scgn), mRNA.                                              |
| 2.07 | Gm3264        | predicted gene 3264 (Gm3264), mRNA.                                                                                  |
| 2.07 | Babam1        | Mus musculus BRISC and BRCA1 A complex member 1 (Babam1), mRNA.                                                      |
| 2.07 | Gm3411        | predicted gene 3411                                                                                                  |
| 2.07 | ---           | Non-coding transcript identified by NONCODE: Linc                                                                    |
| 2.07 | Gm20022       | PREDICTED: predicted gene, 20022 (Gm20022), miscRNA.                                                                 |
| 2.07 | ---           | Non-coding transcript identified by Luo, et al.                                                                      |
| 2.07 | ---           | Non-coding transcript identified by NONCODE: Sense No Exonic                                                         |
| 2.07 | Galm          | Mus musculus galactose mutarotase (Galm), mRNA.                                                                      |
| 2.07 | ---           | Non-coding transcript identified by Luo, et al.                                                                      |
| 2.07 | ---           | Non-coding transcript identified by NONCODE: Sense No Exonic                                                         |
| 2.06 | ---           | Non-coding transcript identified by Luo, et al.                                                                      |
| 2.06 | ---           | Non-coding transcript identified by NONCODE: Sense No Exonic                                                         |
| 2.06 | Gm19453       | PREDICTED: predicted gene, 19453 (Gm19453), miscRNA.                                                                 |
| 2.06 | ---           | Non-coding transcript identified by NONCODE: Sense No Exonic                                                         |
| 2.06 | Mir677        | Mus musculus microRNA 677 (Mir677), microRNA.                                                                        |
| 2.06 | Mpc1-ps       | mitochondrial pyruvate carrier 1, pseudogene                                                                         |
| 2.06 | ---           | Non-coding transcript identified by NONCODE: Sense No Exonic                                                         |
| 2.06 | Bet1l         | Mus musculus blocked early in transport 1 homolog ( <i>S. cerevisiae</i> )-like (Bet1l), mRNA.                       |
| 2.06 | ---           | Non-coding transcript identified by NONCODE: Sense No Exonic                                                         |
| 2.06 | ---           | Non-coding transcript identified by NONCODE: Linc                                                                    |
| 2.05 | ---           | Non-coding transcript identified by Luo, et al.                                                                      |
| 2.05 | ---           | Non-coding transcript identified by Luo, et al.                                                                      |
| 2.05 | A530058N18Rik | Mus musculus RIKEN cDNA A530058N18 gene (A530058N18Rik), long non-coding RNA.                                        |
| 2.05 | Gm14574       | predicted gene 14574 [gene_biotype:processed_pseudogene transcript_biotype:processed_pseudogene]                     |
| 2.05 | ---           | Non-coding transcript identified by NONCODE: Antisense                                                               |
| 2.05 | Samd9l        | Mus musculus sterile alpha motif domain containing 9-like (Samd9l), mRNA.                                            |
| 2.05 | Apoa1         | Mus musculus apolipoprotein A-I (Apoa1), mRNA.                                                                       |
| 2.05 | Btbd9         | Mus musculus BTB (POZ) domain containing 9 (Btbd9), transcript variant 1, mRNA.                                      |
| 2.05 | Rps12-ps5     | ribosomal protein S12 (Rps12) pseudogene [gene_biotype:processed_pseudogene transcript_biotype:processed_pseudogene] |
| 2.05 | Ighv1-70      | Ighv1-70 immunoglobulin heavy variable 1-70                                                                          |
| 2.05 | ---           | Non-coding transcript identified by NONCODE: Sense No Exonic                                                         |
| 2.05 | Gm16363       | predicted gene 16363 [gene_biotype:unprocessed_pseudogene transcript_biotype:unprocessed_pseudogene]                 |
| 2.05 | Gm8355        | predicted pseudogene 8355 [gene_biotype:processed_pseudogene transcript_biotype:processed_pseudogene]                |
| 2.05 | ---           | Non-coding transcript identified by NONCODE: Sense No Exonic                                                         |
| 2.05 | ---           | Non-coding transcript identified by NONCODE: Linc                                                                    |
| 2.05 | Ifnar2        | Mus musculus interferon (alpha and beta) receptor 2 (Ifnar2), transcript variant 2, mRNA.                            |
| 2.05 | Cmas          | Mus musculus cytidine monophospho-N-acetylneuraminic acid synthetase (Cmas), mRNA.                                   |
| 2.05 | Mir1191       | Mus musculus microRNA 1191 (Mir1191), microRNA.                                                                      |
| 2.05 | ---           | Non-coding transcript identified by NONCODE: Linc                                                                    |
| 2.04 | ---           | Non-coding transcript identified by NONCODE: Sense No Exonic                                                         |
| 2.04 | Gm3298        | predicted gene 3298 [gene_biotype:protein_coding transcript_biotype:protein_coding]                                  |
| 2.04 | ---           | Non-coding transcript identified by NONCODE: Sense No Exonic                                                         |
| 2.04 | ---           | Non-coding transcript identified by NONCODE: Sense No Exonic                                                         |
| 2.04 | ---           | Non-coding transcript identified by NONCODE: Linc                                                                    |
| 2.04 | Fam174b       | Mus musculus family with sequence similarity 174, member B (Fam174b), mRNA.                                          |
| 2.04 | ---           | Non-coding transcript identified by Luo, et al.                                                                      |
| 2.04 | ---           | Non-coding transcript identified by NONCODE: Sense No Exonic                                                         |
| 2.04 | ---           | Non-coding transcript identified by NONCODE: Sense No Exonic                                                         |
| 2.04 | Gm24338       | predicted gene, 24338 [gene_biotype:snoRNA transcript_biotype:snoRNA]                                                |
| 2.04 | Gm19650       | PREDICTED: predicted gene, 19650 (Gm19650), miscRNA.                                                                 |
| 2.04 | ---           | Non-coding transcript identified by NONCODE: Sense No Exonic                                                         |
| 2.04 | Gm23232       | predicted gene, 23232 [gene_biotype:snRNA transcript_biotype:snRNA]                                                  |
| 2.04 | ---           | Non-coding transcript identified by NONCODE: Sense No Exonic                                                         |
| 2.04 | Gm23346       | predicted gene, 23346 [gene_biotype:snoRNA transcript_biotype:snoRNA]                                                |
| 2.04 | ---           | Non-coding transcript identified by NONCODE: Linc                                                                    |
| 2.04 | ---           | Non-coding transcript identified by NONCODE: Sense No Exonic                                                         |
| 2.04 | ---           | Non-coding transcript identified by NONCODE: Antisense                                                               |
| 2.04 | Gm25635       | predicted gene, 25635 [gene_biotype:snoRNA transcript_biotype:snoRNA]                                                |
| 2.04 | Rgs9          | Mus musculus regulator of G-protein signaling 9 (Rgs9), transcript variant 2, mRNA.                                  |
| 2.04 | ---           | Non-coding transcript identified by NONCODE: Sense No Exonic                                                         |
| 2.04 | ---           | Non-coding transcript identified by NONCODE: Antisense                                                               |
| 2.04 | Treh          | Mus musculus trehalase (brush-border membrane glycoprotein) (Treh), transcript variant 2, mRNA.                      |
| 2.04 | Cyp4f14       | Mus musculus cytochrome P450, family 4, subfamily f, polypeptide 14 (Cyp4f14), transcript variant 4, mRNA.           |
| 2.03 | 1810037117Rik | Mus musculus RIKEN cDNA 1810037117 gene (1810037117Rik), mRNA.                                                       |
| 2.03 | ---           | Non-coding transcript identified by Luo, et al.                                                                      |
| 2.03 | ---           | Non-coding transcript identified by NONCODE: Linc                                                                    |
| 2.03 | ---           | Non-coding transcript identified by NONCODE: Linc                                                                    |
| 2.03 | ---           | Non-coding transcript identified by NONCODE: Sense No Exonic                                                         |
| 2.03 | ---           | Non-coding transcript identified by NONCODE: Sense No Exonic                                                         |
| 2.03 | Lifr          | Mus musculus leukemia inhibitory factor receptor (Lifr), transcript variant 2, mRNA.                                 |
| 2.03 | ---           | Non-coding transcript identified by Luo, et al.                                                                      |
| 2.03 | Mir1946b      | microRNA 1946b                                                                                                       |
| 2.03 | Tmem59l       | Mus musculus transmembrane protein 59-like (Tmem59l), mRNA.                                                          |
| 2.03 | Gm25834       | predicted gene, 25834 [gene_biotype:snRNA transcript_biotype:snRNA]                                                  |
| 2.03 | Mia3          | Mus musculus melanoma inhibitory activity 3 (Mia3), mRNA.                                                            |

|       |              |                                                                                                                      |
|-------|--------------|----------------------------------------------------------------------------------------------------------------------|
| 2.03  | Dapl1        | Mus musculus death associated protein-like 1 (Dapl1), mRNA.                                                          |
| 2.03  | Prepl        | Mus musculus prolyl endopeptidase-like (Prepl), transcript variant 1, mRNA.                                          |
| 2.03  | Gm24248      | predicted gene, 24248                                                                                                |
| 2.03  | ---          | Non-coding transcript identified by NONCODE: Antisense                                                               |
| 2.03  | ---          | Non-coding transcript identified by NONCODE: Sense No Exonic                                                         |
| 2.03  | ---          | Non-coding transcript identified by Luo, et al.                                                                      |
| 2.03  | ---          | Non-coding transcript identified by NONCODE: Linc                                                                    |
| 2.03  | ---          | Non-coding transcript identified by NONCODE: Sense No Exonic                                                         |
| 2.03  | ---          | Non-coding transcript identified by NONCODE: Sense No Exonic                                                         |
| 2.02  | ---          | Non-coding transcript identified by NONCODE: Linc                                                                    |
| 2.02  | Ndufa1       | Mus musculus NADH dehydrogenase (ubiquinone) 1 alpha subcomplex, 1 (Ndufa1), mRNA.                                   |
| 2.02  | ---          | Non-coding transcript identified by NONCODE: Sense No Exonic                                                         |
| 2.02  | Capn7        | Mus musculus calpain 7 (Capn7), mRNA.                                                                                |
| 2.02  | ---          | Non-coding transcript identified by NONCODE: Sense No Exonic                                                         |
| 2.02  | ---          | Non-coding transcript identified by NONCODE: Sense No Exonic                                                         |
| 2.02  | ---          | Non-coding transcript identified by Luo, et al.                                                                      |
| 2.02  | Gm4985       | predicted gene 4985 [gene_biotype:protein_coding transcript_biotype:protein_coding]                                  |
| 2.02  | Gm15903      | predicted gene 15903                                                                                                 |
| 2.02  | ---          | Non-coding transcript identified by NONCODE: Sense No Exonic                                                         |
| 2.02  | ---          | Non-coding transcript identified by NONCODE: Linc                                                                    |
| 2.02  | ---          | Non-coding transcript identified by Luo, et al.                                                                      |
| 2.02  | Gm13231      | predicted gene 13231 [gene_biotype:processed_pseudogene transcript_biotype:processed_pseudogene]                     |
| 2.01  | ---          | Non-coding transcript identified by NONCODE: Sense No Exonic                                                         |
| 2.01  | ---          | Non-coding transcript identified by NONCODE: Sense No Exonic                                                         |
| 2.01  | ---          | Non-coding transcript identified by Luo, et al.                                                                      |
| 2.01  | ---          | Non-coding transcript identified by NONCODE: Linc                                                                    |
| 2.01  | ---          | Non-coding transcript identified by NONCODE: Sense No Exonic                                                         |
| 2.01  | ---          | Non-coding transcript identified by NONCODE: Sense No Exonic                                                         |
| 2.01  | ---          | Non-coding transcript identified by NONCODE: Linc                                                                    |
| 2.01  | Cyp2d26      | Mus musculus cytochrome P450, family 2, subfamily d, polypeptide 26 (Cyp2d26), mRNA.                                 |
| 2.01  | ---          | Non-coding transcript identified by NONCODE: Sense No Exonic                                                         |
| 2.01  | ---          | Non-coding transcript identified by Luo, et al.                                                                      |
| 2.01  | ---          | Non-coding transcript identified by NONCODE: Linc                                                                    |
| 2.01  | ---          | Non-coding transcript identified by NONCODE: Sense No Exonic                                                         |
| 2.01  | Pappa2       | Mus musculus pappalysin 2 (Pappa2), mRNA.                                                                            |
| 2.01  | Bsg          | Mus musculus basigin (Bsg), transcript variant 2, mRNA.                                                              |
| 2.01  | Vmn1r224     | Mus musculus vomeronasal 1 receptor 224 (Vmn1r224), mRNA.                                                            |
| 2.01  | Usp18        | Mus musculus ubiquitin specific peptidase 18 (Usp18), mRNA.                                                          |
| 2.01  | Sell         | Mus musculus selectin, lymphocyte (Sell), transcript variant 2, mRNA.                                                |
| 2.01  | ---          | Non-coding transcript identified by NONCODE: Antisense,Sense No Exonic                                               |
| 2.00  | Gm7079       | predicted pseudogene 7079 [gene_biotype:processed_pseudogene transcript_biotype:processed_pseudogene]                |
| 2.00  | Inha         | Mus musculus inhibin alpha (Inha), mRNA.                                                                             |
| 2.00  | ---          | Non-coding transcript identified by NONCODE: Sense No Exonic                                                         |
| 2.00  | ---          | Non-coding transcript identified by NONCODE: Sense No Exonic                                                         |
| 2.00  | LOC100862010 | PREDICTED: uncharacterized LOC100862010 (LOC100862010), miscRNA.                                                     |
| 2.00  | Gm24879      | predicted gene, 24879 [gene_biotype:snoRNA transcript_biotype:snoRNA]                                                |
| 2.00  | ---          | Non-coding transcript identified by NONCODE: Sense No Exonic                                                         |
| 2.00  | Mdh2         | Mus musculus malate dehydrogenase 2, NAD (mitochondrial) (Mdh2), mRNA.                                               |
| 2.00  | ---          | Non-coding transcript identified by Luo, et al.                                                                      |
| 2.00  | Aplp1        | Mus musculus amyloid beta (A4) precursor-like protein 1 (Aplp1), mRNA.                                               |
| 2.00  | ---          | Non-coding transcript identified by NONCODE: Antisense,Sense No Exonic                                               |
| 2.00  | ---          | Non-coding transcript identified by NONCODE: Sense No Exonic                                                         |
| 2.00  | ---          | Non-coding transcript identified by NONCODE: Sense No Exonic                                                         |
| 2.00  | ---          | Non-coding transcript identified by NONCODE: Antisense                                                               |
| 2.00  | ---          | Non-coding transcript identified by NONCODE: Antisense                                                               |
| 2.00  | ---          | Non-coding transcript identified by Luo, et al.                                                                      |
| 2.00  | ---          | Non-coding transcript identified by NONCODE: Linc                                                                    |
| 2.00  | ---          | Non-coding transcript identified by NONCODE: Linc                                                                    |
| 2.00  | ---          | Non-coding transcript identified by NONCODE: Sense No Exonic                                                         |
| 2.00  | ---          | Non-coding transcript identified by NONCODE: Antisense                                                               |
| 2.00  | Mir463       | Mus musculus microRNA 463 (Mir463), microRNA.                                                                        |
| 2.00  | Rpl21-ps3    | ribosomal protein L21, pseudogene 3 [gene_biotype:processed_pseudogene transcript_biotype:processed_pseudogene]      |
| -2.00 | Rpl17-ps1    | ribosomal protein L17 (Rpl17) pseudogene [gene_biotype:processed_pseudogene transcript_biotype:processed_pseudogene] |
| -2.00 | Gm17117      | predicted gene 17117 [gene_biotype:processed_pseudogene transcript_biotype:processed_pseudogene]                     |
| -2.00 | ---          | Non-coding transcript identified by NONCODE: Sense No Exonic                                                         |
| -2.00 | Gm13229      | predicted gene 13229                                                                                                 |
| -2.00 | Olf292       | Mus musculus olfactory receptor 292 (Olf292), mRNA.                                                                  |
| -2.00 | ---          | Non-coding transcript identified by NONCODE: Linc                                                                    |
| -2.00 | ---          | Non-coding transcript identified by NONCODE: Linc                                                                    |
| -2.00 | n-R5s3       | nuclear encoded rRNA 5S 3 [gene_biotype:rRNA transcript_biotype:rRNA]                                                |
| -2.00 | ---          | Non-coding transcript identified by Luo, et al.                                                                      |
| -2.00 | Zfp572       | Mus musculus zinc finger protein 572 (Zfp572), non-coding RNA.                                                       |
| -2.00 | Gm25041      | predicted gene, 25041 [gene_biotype:miRNA transcript_biotype:miRNA]                                                  |
| -2.00 | Gm25794      | predicted gene, 25794 [gene_biotype:snRNA transcript_biotype:snRNA]                                                  |
| -2.00 | Ppme1        | Mus musculus protein phosphatase methylesterase 1 (Ppme1), mRNA.                                                     |
| -2.00 | ---          | Non-coding transcript identified by NONCODE: Sense No Exonic                                                         |
| -2.00 | Anp32-ps     | acidic (leucine-rich) nuclear phosphoprotein 32 family, pseudogene [gene_biotype:processed_pseudogene transcript_    |

|       |               |                                                                                                                                |
|-------|---------------|--------------------------------------------------------------------------------------------------------------------------------|
| -2.00 | Mir1912       | Mus musculus microRNA 1912 (Mir1912), microRNA.                                                                                |
| -2.00 | Trav5n-4      | Trav5n-4 T cell receptor alpha variable 5N-4                                                                                   |
| -2.00 | ---           | Non-coding transcript identified by NONCODE: Sense No Exonic                                                                   |
| -2.00 | Gm27034       | predicted gene, 27034 [gene_biotype:processed_pseudogene transcript_biotype:processed_pseudogene]                              |
| -2.00 | Usp32         | Mus musculus ubiquitin specific peptidase 32 (Usp32), mRNA.                                                                    |
| -2.00 | Gm24046       | predicted gene, 24046 [gene_biotype:snRNA transcript_biotype:snRNA]                                                            |
| -2.01 | Gm3150        | predicted gene 3150                                                                                                            |
| -2.01 | ---           | Mus musculus non-coding RNA, oocyte_piRNA1592, complete sequence.                                                              |
| -2.01 | ---           | Non-coding transcript identified by Luo, et al.                                                                                |
| -2.01 | ---           | Mus musculus non-coding RNA, oocyte_clustered_small_RNA2158, complete sequence.                                                |
| -2.01 | Gm4784        | predicted gene 4784 [gene_biotype:processed_pseudogene transcript_biotype:processed_pseudogene]                                |
| -2.01 | Gm11875       | predicted gene 11875 [gene_biotype:processed_pseudogene transcript_biotype:processed_pseudogene]                               |
| -2.01 | Gm9531        | predicted gene 9531 [gene_biotype:transcribed_processed_pseudogene transcript_biotype:processed_transcript]                    |
| -2.01 | Gm22645       | predicted gene, 22645 [gene_biotype:snRNA transcript_biotype:snRNA]                                                            |
| -2.01 | Gm23737       | predicted gene, 23737 [gene_biotype:snRNA transcript_biotype:snRNA]                                                            |
| -2.01 | ---           | Non-coding transcript identified by Luo, et al.                                                                                |
| -2.01 | Gm7833        | predicted gene 7833 [gene_biotype:processed_pseudogene transcript_biotype:processed_pseudogene]                                |
| -2.01 | Hrsp12        | Mus musculus heat-responsive protein 12 (Hrsp12), mRNA.                                                                        |
| -2.01 | Gm10718       | predicted gene 10718 [gene_biotype:protein_coding transcript_biotype:protein_coding]                                           |
| -2.01 | Gm3835        | predicted pseudogene 3835 [gene_biotype:processed_pseudogene transcript_biotype:processed_pseudogene]                          |
| -2.01 | ---           | Non-coding transcript identified by NONCODE: Antisense                                                                         |
| -2.01 | ---           | Non-coding transcript identified by NONCODE: Sense No Exonic                                                                   |
| -2.01 | ---           | Non-coding transcript identified by NONCODE: Linc                                                                              |
| -2.01 | ---           | Mus musculus piRNA piR-136889, complete sequence.                                                                              |
| -2.01 | Gm5644        | predicted gene 5644                                                                                                            |
| -2.01 | ---           | Non-coding transcript identified by NONCODE: Linc                                                                              |
| -2.01 | Gm23924       | predicted gene, 23924 [gene_biotype:snRNA transcript_biotype:snRNA]                                                            |
| -2.01 | Mirlet7b      | Mus musculus microRNA let7b (Mirlet7b), microRNA.                                                                              |
| -2.01 | S100a9        | Mus musculus S100 calcium binding protein A9 (calgranulin B) (S100a9), transcript variant 1, mRNA.                             |
| -2.01 | Gm22671       | predicted gene, 22671 [gene_biotype:snoRNA transcript_biotype:snoRNA]                                                          |
| -2.01 | ---           | Non-coding transcript identified by NONCODE: Sense No Exonic                                                                   |
| -2.01 | Gm17203       | predicted gene 17203 [gene_biotype:lincRNA transcript_biotype:lincRNA]                                                         |
| -2.01 | Rps19-ps11    | ribosomal protein S19, pseudogene 11 [gene_biotype:processed_pseudogene transcript_biotype:processed_pseudogene]               |
| -2.01 | Gm22453       | predicted gene, 22453                                                                                                          |
| -2.01 | ---           | Non-coding transcript identified by NONCODE: Linc                                                                              |
| -2.01 | Gm24382       | predicted gene, 24382 [gene_biotype:snRNA transcript_biotype:snRNA]                                                            |
| -2.01 | Gm25424       | predicted gene, 25424 [gene_biotype:snRNA transcript_biotype:snRNA]                                                            |
| -2.02 | Gm24119       | predicted gene, 24119 [gene_biotype:snoRNA transcript_biotype:snoRNA]                                                          |
| -2.02 | ---           | Non-coding transcript identified by NONCODE: Linc                                                                              |
| -2.02 | ---           | Non-coding transcript identified by NONCODE: Sense No Exonic                                                                   |
| -2.02 | ---           | Non-coding transcript identified by NONCODE: Sense No Exonic                                                                   |
| -2.02 | Gm22606       | predicted gene, 22606 [gene_biotype:snRNA transcript_biotype:snRNA]                                                            |
| -2.02 | Gm11829       | predicted gene 11829 [gene_biotype:processed_pseudogene transcript_biotype:processed_pseudogene]                               |
| -2.02 | Snora69       | Mus musculus small nucleolar RNA, H/ACA box 69 (Snora69), small nucleolar RNA.                                                 |
| -2.02 | Gm4017        | predicted gene 4017 [gene_biotype:processed_pseudogene transcript_biotype:processed_pseudogene]                                |
| -2.02 | n-R5s166      | nuclear encoded rRNA 5S 166 [gene_biotype:rRNA transcript_biotype:rRNA]                                                        |
| -2.02 | ---           | Non-coding transcript identified by Luo, et al.                                                                                |
| -2.02 | Rpl31-ps20    | ribosomal protein L31, pseudogene 20 [gene_biotype:processed_pseudogene transcript_biotype:processed_pseudogene]               |
| -2.02 | Gm10193       | PREDICTED: predicted gene 10193 (Gm10193), mRNA.                                                                               |
| -2.02 | ---           | Non-coding transcript identified by NONCODE: Linc                                                                              |
| -2.02 | Gm25773       | predicted gene, 25773 [gene_biotype:miRNA transcript_biotype:miRNA]                                                            |
| -2.03 | ---           | Non-coding transcript identified by NONCODE: Sense No Exonic                                                                   |
| -2.03 | Gm26310       | predicted gene, 26310 [gene_biotype:snoRNA transcript_biotype:snoRNA]                                                          |
| -2.03 | Gm14007       | predicted gene 14007                                                                                                           |
| -2.03 | ---           | Non-coding transcript identified by NONCODE: Linc                                                                              |
| -2.03 | ---           | Non-coding transcript identified by NONCODE: Sense No Exonic                                                                   |
| -2.03 | Gm24834       | predicted gene, 24834                                                                                                          |
| -2.03 | ---           | Non-coding transcript identified by NONCODE: Linc                                                                              |
| -2.03 | Gm25205       | predicted gene, 25205 [gene_biotype:snRNA transcript_biotype:snRNA]                                                            |
| -2.03 | 5730460C07Rik | Mus musculus RIKEN cDNA 5730460C07 gene (5730460C07Rik), long non-coding RNA.                                                  |
| -2.03 | Gm14766       | predicted gene 14766 [gene_biotype:processed_pseudogene transcript_biotype:processed_pseudogene]                               |
| -2.03 | Gpx8          | Mus musculus glutathione peroxidase 8 (putative) (Gpx8), mRNA.                                                                 |
| -2.03 | ---           | Non-coding transcript identified by NONCODE: Sense No Exonic                                                                   |
| -2.03 | Gm25651       | predicted gene, 25651 [gene_biotype:snoRNA transcript_biotype:snoRNA]                                                          |
| -2.03 | Taar7c-ps     | trace amine-associated receptor 7C, pseudogene [gene_biotype:unprocessed_pseudogene transcript_biotype:unprocessed_pseudogene] |
| -2.03 | LOC100862405  | PREDICTED: uncharacterized LOC100862405 (LOC100862405), miscRNA.                                                               |
| -2.03 | ---           | Non-coding transcript identified by Luo, et al.                                                                                |
| -2.03 | Gm25897       | predicted gene, 25897 [gene_biotype:snRNA transcript_biotype:snRNA]                                                            |
| -2.04 | ---           | Non-coding transcript identified by NONCODE: Linc                                                                              |
| -2.04 | Gm26487       | predicted gene, 26487 [gene_biotype:snRNA transcript_biotype:snRNA]                                                            |
| -2.04 | ---           | Non-coding transcript identified by NONCODE: Sense No Exonic                                                                   |
| -2.04 | ---           | Non-coding transcript identified by NONCODE: Sense No Exonic                                                                   |
| -2.04 | Gm11927       | predicted gene 11927 [gene_biotype:processed_pseudogene transcript_biotype:processed_pseudogene]                               |
| -2.04 | ---           | Non-coding transcript identified by NONCODE: Linc                                                                              |
| -2.04 | Mir3100       | Mus musculus microRNA 3100 (Mir3100), microRNA.                                                                                |
| -2.04 | ---           | Mus musculus non-coding RNA, oocyte_clustered_small_RNA4866, complete sequence.                                                |
| -2.04 | Gm26165       | predicted gene, 26165 [gene_biotype:snoRNA transcript_biotype:snoRNA]                                                          |

|       |              |                                                                                                                      |
|-------|--------------|----------------------------------------------------------------------------------------------------------------------|
| -2.04 | ---          | Non-coding transcript identified by Luo, et al.                                                                      |
| -2.04 | ---          | Non-coding transcript identified by Luo, et al.                                                                      |
| -2.04 | ---          | Non-coding transcript identified by NONCODE: Sense No Exonic                                                         |
| -2.04 | Mup-ps3      | major urinary protein, pseudogene 3 [gene_biotype:unprocessed_pseudogene transcript_biotype:unprocessed_pseudogene]  |
| -2.04 | Mup-ps11     | major urinary protein, pseudogene 11 [gene_biotype:unprocessed_pseudogene transcript_biotype:unprocessed_pseudogene] |
| -2.04 | ---          | Non-coding transcript identified by NONCODE: Linc                                                                    |
| -2.04 | Gm12520      | predicted gene 12520 [gene_biotype:processed_pseudogene transcript_biotype:processed_pseudogene]                     |
| -2.04 | Mir7675      | Mus musculus microRNA 7675 (Mir7675), microRNA.                                                                      |
| -2.04 | Gm26491      | predicted gene, 26491 [gene_biotype:miRNA transcript_biotype:miRNA]                                                  |
| -2.04 | Hist1h2ah    | Mus musculus histone cluster 1, H2ah (Hist1h2ah), mRNA.                                                              |
| -2.05 | ---          | Non-coding transcript identified by NONCODE: Linc                                                                    |
| -2.05 | Gm10728      | predicted gene 10728                                                                                                 |
| -2.05 | ---          | Non-coding transcript identified by NONCODE: Sense No Exonic                                                         |
| -2.05 | Mettl18      | Mus musculus methyltransferase like 18 (Mettl18), mRNA.                                                              |
| -2.05 | Gm24880      | predicted gene, 24880 [gene_biotype:rRNA transcript_biotype:rRNA]                                                    |
| -2.05 | Gm24990      | predicted gene, 24990                                                                                                |
| -2.05 | Gm14807      | predicted gene 14807 [gene_biotype:processed_pseudogene transcript_biotype:processed_pseudogene]                     |
| -2.05 | Gast         | Mus musculus gastrin (Gast), mRNA.                                                                                   |
| -2.05 | Rnu11        | Mus musculus U11 small nuclear RNA (Rnu11), small nuclear RNA.                                                       |
| -2.05 | ---          | Non-coding transcript identified by NONCODE: Linc                                                                    |
| -2.05 | Gm26250      | predicted gene, 26250 [gene_biotype:miRNA transcript_biotype:miRNA]                                                  |
| -2.05 | Rap1a-ps2    | RAS related protein-1a, pseudogene 2 [gene_biotype:processed_pseudogene transcript_biotype:processed_pseudogene]     |
| -2.05 | Ctrc         | Mus musculus chymotrypsin C (caldecrin) (Ctrc), mRNA.                                                                |
| -2.05 | ---          | Mus musculus piRNA piR-135403, complete sequence.                                                                    |
| -2.05 | Gm27233      | predicted gene 27233 [gene_biotype:processed_pseudogene transcript_biotype:processed_pseudogene]                     |
| -2.05 | LOC100861616 | PREDICTED: uncharacterized LOC100861616, transcript variant 1 (LOC100861616), miscRNA.                               |
| -2.05 | Gm25137      | predicted gene, 25137 [gene_biotype:snRNA transcript_biotype:snRNA]                                                  |
| -2.05 | ---          | Non-coding transcript identified by Luo, et al.                                                                      |
| -2.05 | ---          | Non-coding transcript identified by Luo, et al.                                                                      |
| -2.05 | Olfr1082     | Mus musculus olfactory receptor 1082 (Olfr1082), mRNA.                                                               |
| -2.05 | Gm23600      | predicted gene, 23600 [gene_biotype:snoRNA transcript_biotype:snoRNA]                                                |
| -2.05 | Gm25813      | predicted gene, 25813 [gene_biotype:snRNA transcript_biotype:snRNA]                                                  |
| -2.05 | Mir130b      | Mus musculus microRNA 130b (Mir130b), microRNA.                                                                      |
| -2.06 | Defb46       | Mus musculus defensin beta 46 (Defb46), mRNA.                                                                        |
| -2.06 | Gm26781      | predicted gene, 26781 [gene_biotype:antisense transcript_biotype:antisense]                                          |
| -2.06 | ---          | Non-coding transcript identified by NONCODE: Sense No Exonic                                                         |
| -2.06 | Gm8876       | predicted gene 8876 [gene_biotype:processed_pseudogene transcript_biotype:processed_pseudogene]                      |
| -2.06 | Gm13127      | predicted gene 13127 [gene_biotype:processed_pseudogene transcript_biotype:processed_pseudogene]                     |
| -2.06 | Gm25473      | predicted gene, 25473 [gene_biotype:snRNA transcript_biotype:snRNA]                                                  |
| -2.06 | Gm13577      | predicted gene 13577 [gene_biotype:processed_pseudogene transcript_biotype:processed_pseudogene]                     |
| -2.06 | Gm22957      | predicted gene, 22957 [gene_biotype:snoRNA transcript_biotype:snoRNA]                                                |
| -2.06 | ---          | Mus musculus non-coding RNA, oocyte_clustered_small_RNA5271, complete sequence.                                      |
| -2.06 | ---          | Mus musculus non-coding RNA, oocyte_clustered_small_RNA5129, complete sequence.                                      |
| -2.06 | Gm6368       | predicted gene 6368 [gene_biotype:processed_pseudogene transcript_biotype:processed_pseudogene]                      |
| -2.06 | ---          | Non-coding transcript identified by NONCODE: Sense No Exonic                                                         |
| -2.06 | Mir7651      | microRNA 7651 [gene_biotype:miRNA transcript_biotype:miRNA]                                                          |
| -2.06 | Mir7651      | Mus musculus microRNA 7651 (Mir7651), microRNA.                                                                      |
| -2.06 | ---          | Non-coding transcript identified by NONCODE: Linc                                                                    |
| -2.06 | Gm6067       | predicted gene 6067 [gene_biotype:processed_pseudogene transcript_biotype:processed_pseudogene]                      |
| -2.06 | ---          | Non-coding transcript identified by NONCODE: Linc                                                                    |
| -2.06 | Ighv3-5      | Ighv3-5 immunoglobulin heavy variable 3-5                                                                            |
| -2.06 | Gm15183      | predicted gene 15183 [gene_biotype:processed_pseudogene transcript_biotype:processed_pseudogene]                     |
| -2.06 | Gm25404      | predicted gene, 25404 [gene_biotype:snRNA transcript_biotype:snRNA]                                                  |
| -2.06 | ---          | Non-coding transcript identified by NONCODE: Sense No Exonic                                                         |
| -2.06 | ---          | Non-coding transcript identified by NONCODE: Sense No Exonic                                                         |
| -2.06 | ---          | Non-coding transcript identified by NONCODE: Antisense                                                               |
| -2.06 | ---          | Non-coding transcript identified by NONCODE: Linc                                                                    |
| -2.06 | ---          | Non-coding transcript identified by Luo, et al.                                                                      |
| -2.06 | Gm23712      | predicted gene, 23712 [gene_biotype:snRNA transcript_biotype:snRNA]                                                  |
| -2.06 | ---          | Non-coding transcript identified by Luo, et al.                                                                      |
| -2.06 | Gm22352      | predicted gene, 22352 [gene_biotype:snRNA transcript_biotype:snRNA]                                                  |
| -2.06 | Gm24584      | predicted gene, 24584 [gene_biotype:snRNA transcript_biotype:snRNA]                                                  |
| -2.06 | Gm10334      | Mus musculus predicted gene 10334 (Gm10334), mRNA.                                                                   |
| -2.06 | Gm23506      | predicted gene, 23506 [gene_biotype:snRNA transcript_biotype:snRNA]                                                  |
| -2.06 | Gm17546      | predicted gene, 17546                                                                                                |
| -2.06 | Gm13711      | predicted gene 13711 [gene_biotype:unprocessed_pseudogene transcript_biotype:unprocessed_pseudogene]                 |
| -2.06 | ---          | Non-coding transcript identified by NONCODE: Linc                                                                    |
| -2.06 | ---          | Non-coding transcript identified by NONCODE: Sense No Exonic                                                         |
| -2.07 | Gm16019      | predicted gene 16019 [gene_biotype:lincRNA transcript_biotype:lincRNA]                                               |
| -2.07 | Gm15714      | predicted gene 15714 [gene_biotype:processed_pseudogene transcript_biotype:processed_pseudogene]                     |
| -2.07 | Rbpsuh-rs3   | recombining binding protein suppressor of hairless (Drosophila), related sequence 3                                  |
| -2.07 | ---          | Non-coding transcript identified by Luo, et al.                                                                      |
| -2.07 | ---          | Non-coding transcript identified by NONCODE: Linc                                                                    |
| -2.07 | Mir6964      | Mus musculus microRNA 6964 (Mir6964), microRNA.                                                                      |
| -2.07 | Rnu3b1       | U3B small nuclear RNA 1 (Rnu3b1), small nuclear RNA.                                                                 |
| -2.07 | Rnu3b3       | U3B small nuclear RNA 3 (Rnu3b3), small nuclear RNA.                                                                 |
| -2.07 | Rnu3b2       | U3B small nuclear RNA 2 (Rnu3b2), small nuclear RNA.                                                                 |

|       |            |                                                                                                                      |
|-------|------------|----------------------------------------------------------------------------------------------------------------------|
| -2.07 | Gm23374    | predicted gene, 23374 [gene_biotype:miRNA transcript_biotype:miRNA]                                                  |
| -2.07 | Lcorl      | Mus musculus ligand dependent nuclear receptor corepressor-like (Lcorl), transcript variant 1, mRNA.                 |
| -2.07 | Gm26239    | predicted gene, 26239 [gene_biotype:snRNA transcript_biotype:snRNA]                                                  |
| -2.07 | Gm24225    | predicted gene, 24225 [gene_biotype:snRNA transcript_biotype:snRNA]                                                  |
| -2.07 | Cdkl5      | Mus musculus cyclin-dependent kinase-like 5 (Cdkl5), mRNA.                                                           |
| -2.07 | Gm24950    | predicted gene, 24950 [gene_biotype:snRNA transcript_biotype:snRNA]                                                  |
| -2.07 | Gm14480    | predicted gene 14480 [gene_biotype:processed_pseudogene transcript_biotype:processed_pseudogene]                     |
| -2.07 | Gm14914    | predicted gene 14914 [gene_biotype:processed_pseudogene transcript_biotype:processed_pseudogene]                     |
| -2.07 | Gm27521    | predicted gene, 27521 [gene_biotype:snRNA transcript_biotype:snRNA]                                                  |
| -2.07 | Gm7551     | predicted gene 7551 [gene_biotype:processed_pseudogene transcript_biotype:processed_pseudogene]                      |
| -2.07 | Gm23509    | predicted gene, 23509 [gene_biotype:snRNA transcript_biotype:snRNA]                                                  |
| -2.07 | ---        | Non-coding transcript identified by NONCODE: Antisense                                                               |
| -2.07 | Gm23048    | predicted gene, 23048 [gene_biotype:snoRNA transcript_biotype:snoRNA]                                                |
| -2.07 | Gm25525    | predicted gene, 25525 [gene_biotype:snRNA transcript_biotype:snRNA]                                                  |
| -2.07 | Vmn2r-ps15 | vomeronal 2, receptor, pseudogene 15 [gene_biotype:unprocessed_pseudogene transcript_biotype:unprocessed_pseudogene] |
| -2.07 | ---        | U2 spliceosomal RNA [gene_biotype:snRNA transcript_biotype:snRNA]                                                    |
| -2.07 | ---        | Non-coding transcript identified by NONCODE: Sense No Exonic                                                         |
| -2.07 | Gm26378    | predicted gene, 26378 [gene_biotype:snRNA transcript_biotype:snRNA]                                                  |
| -2.07 | Mir7002    | Mus musculus microRNA 7002 (Mir7002), microRNA.                                                                      |
| -2.08 | Gm14108    | predicted gene 14108 [gene_biotype:processed_pseudogene transcript_biotype:processed_pseudogene]                     |
| -2.08 | Gm24086    | predicted gene, 24086 [gene_biotype:snRNA transcript_biotype:snRNA]                                                  |
| -2.08 | Gm11782    | predicted gene 11782 [gene_biotype:lincRNA transcript_biotype:lincRNA]                                               |
| -2.08 | Gm24492    | predicted gene, 24492 [gene_biotype:snRNA transcript_biotype:snRNA]                                                  |
| -2.08 | ---        | Non-coding transcript identified by NONCODE: Linc                                                                    |
| -2.08 | Scgb1b7    | Mus musculus secretoglobin, family 1B, member 7 (Scgb1b7), mRNA.                                                     |
| -2.08 | Gm10985    | predicted gene 10985 [gene_biotype:protein_coding transcript_biotype:protein_coding]                                 |
| -2.08 | ---        | Non-coding transcript identified by NONCODE: Sense No Exonic                                                         |
| -2.08 | Olf1392    | Mus musculus olfactory receptor 1392 (Olf1392), mRNA.                                                                |
| -2.08 | Gm25704    | predicted gene, 25704 [gene_biotype:snRNA transcript_biotype:snRNA]                                                  |
| -2.08 | Gm14805    | predicted gene 14805 [gene_biotype:processed_pseudogene transcript_biotype:processed_pseudogene]                     |
| -2.08 | n-R5s15    | nuclear encoded rRNA 5S 15 [gene_biotype:rRNA transcript_biotype:rRNA]                                               |
| -2.08 | Gm14500    | predicted gene 14500 [gene_biotype:unprocessed_pseudogene transcript_biotype:unprocessed_pseudogene]                 |
| -2.08 | Gm27921    | predicted gene, 27921 [gene_biotype:miRNA transcript_biotype:miRNA]                                                  |
| -2.08 | ---        | Non-coding transcript identified by NONCODE: Sense No Exonic                                                         |
| -2.08 | Gm22885    | predicted gene, 22885 [gene_biotype:snRNA transcript_biotype:snRNA]                                                  |
| -2.08 | Gm24510    | predicted gene, 24510 [gene_biotype:miRNA transcript_biotype:miRNA]                                                  |
| -2.08 | ---        | Non-coding transcript identified by NONCODE: Sense No Exonic                                                         |
| -2.08 | Gm25930    | predicted gene, 25930 [gene_biotype:snRNA transcript_biotype:snRNA]                                                  |
| -2.08 | ---        | Non-coding transcript identified by NONCODE: Linc                                                                    |
| -2.08 | Gm25099    | predicted gene, 25099 [gene_biotype:snRNA transcript_biotype:snRNA]                                                  |
| -2.08 | Gm17190    | predicted gene 17190 [gene_biotype:protein_coding transcript_biotype:translated_processed_pseudogene]                |
| -2.09 | Gm12565    | predicted gene 12565 [gene_biotype:processed_pseudogene transcript_biotype:processed_pseudogene]                     |
| -2.09 | ---        | Non-coding transcript identified by NONCODE: Linc                                                                    |
| -2.09 | ---        | Non-coding transcript identified by NONCODE: Linc                                                                    |
| -2.09 | Mir6370    | Mus musculus microRNA 6370 (Mir6370), microRNA.                                                                      |
| -2.09 | Gm6758     | predicted gene 6758 [gene_biotype:processed_pseudogene transcript_biotype:processed_pseudogene]                      |
| -2.09 | n-R5s71    | nuclear encoded rRNA 5S 71 [gene_biotype:rRNA transcript_biotype:rRNA]                                               |
| -2.09 | Gm22264    | predicted gene, 22264 [gene_biotype:snRNA transcript_biotype:snRNA]                                                  |
| -2.09 | Gm25173    | predicted gene, 25173 [gene_biotype:snRNA transcript_biotype:snRNA]                                                  |
| -2.09 | Gm25211    | predicted gene, 25211 [gene_biotype:snRNA transcript_biotype:snRNA]                                                  |
| -2.09 | Gm26324    | predicted gene, 26324 [gene_biotype:snRNA transcript_biotype:snRNA]                                                  |
| -2.09 | Gm23732    | predicted gene, 23732 [gene_biotype:snRNA transcript_biotype:snRNA]                                                  |
| -2.09 | Gm12513    | predicted gene 12513 [gene_biotype:processed_pseudogene transcript_biotype:processed_pseudogene]                     |
| -2.09 | Gm15375    | predicted gene 15375 [gene_biotype:unprocessed_pseudogene transcript_biotype:unprocessed_pseudogene]                 |
| -2.09 | Gm14774    | predicted gene 14774 [gene_biotype:processed_pseudogene transcript_biotype:processed_pseudogene]                     |
| -2.09 | ---        | Non-coding transcript identified by NONCODE: Sense No Exonic                                                         |
| -2.09 | Tpm3-rs2   | tropomyosin 3, related sequence 2 [gene_biotype:processed_pseudogene transcript_biotype:processed_pseudogene]        |
| -2.09 | ---        | Non-coding transcript identified by NONCODE: Linc                                                                    |
| -2.09 | ---        | Non-coding transcript identified by Luo, et al.                                                                      |
| -2.09 | Gm26331    | predicted gene, 26331 [gene_biotype:snRNA transcript_biotype:snRNA]                                                  |
| -2.09 | Gm22527    | predicted gene, 22527 [gene_biotype:rRNA transcript_biotype:rRNA]                                                    |
| -2.09 | Rsf1os1    | remodeling and spacing factor 1, opposite strand 1 [gene_biotype:antisense transcript_biotype:antisense]             |
| -2.09 | Gm25929    | predicted gene, 25929 [gene_biotype:snRNA transcript_biotype:snRNA]                                                  |
| -2.10 | Gm9064     | predicted gene 9064 [gene_biotype:processed_pseudogene transcript_biotype:processed_pseudogene]                      |
| -2.10 | Gm22056    | predicted gene, 22056 [gene_biotype:snRNA transcript_biotype:snRNA]                                                  |
| -2.10 | Gm22392    | predicted gene, 22392 [gene_biotype:snRNA transcript_biotype:snRNA]                                                  |
| -2.10 | Gm13679    | predicted gene 13679                                                                                                 |
| -2.10 | Gm25101    | predicted gene, 25101 [gene_biotype:snRNA transcript_biotype:snRNA]                                                  |
| -2.10 | ---        | Non-coding transcript identified by NONCODE: Linc                                                                    |
| -2.10 | Gm26245    | predicted gene, 26245 [gene_biotype:snRNA transcript_biotype:snRNA]                                                  |
| -2.10 | ---        | Non-coding transcript identified by Luo, et al.                                                                      |
| -2.10 | Gm24547    | predicted gene, 24547 [gene_biotype:snRNA transcript_biotype:snRNA]                                                  |
| -2.10 | Gm23002    | predicted gene, 23002 [gene_biotype:snRNA transcript_biotype:snRNA]                                                  |
| -2.10 | Gm13457    | predicted gene 13457 [gene_biotype:processed_pseudogene transcript_biotype:processed_pseudogene]                     |
| -2.10 | Gm15349    | predicted gene 15349 [gene_biotype:processed_pseudogene transcript_biotype:processed_pseudogene]                     |
| -2.10 | ---        | Non-coding transcript identified by NONCODE: Antisense                                                               |
| -2.10 | Gm11862    | predicted gene 11862 [gene_biotype:processed_pseudogene transcript_biotype:processed_pseudogene]                     |

|       |               |                                                                                                                                          |
|-------|---------------|------------------------------------------------------------------------------------------------------------------------------------------|
| -2.10 | Calm2         | Mus musculus calmodulin 2 (Calm2), mRNA.                                                                                                 |
| -2.10 | ---           | Non-coding transcript identified by Luo, et al.                                                                                          |
| -2.10 | ---           | Non-coding transcript identified by NONCODE: Linc                                                                                        |
| -2.10 | Snord13       | Mus musculus small nucleolar RNA, C/D box 13 (Snord13), small nucleolar RNA.                                                             |
| -2.10 | Gm25080       | predicted gene, 25080 [gene_biotype:snRNA transcript_biotype:snRNA]                                                                      |
| -2.10 | Gm22452       | predicted gene, 22452 [gene_biotype:snRNA transcript_biotype:snRNA]                                                                      |
| -2.10 | ---           | Non-coding transcript identified by NONCODE: Linc                                                                                        |
| -2.10 | Gm24593       | predicted gene, 24593 [gene_biotype:snRNA transcript_biotype:snRNA]                                                                      |
| -2.10 | Olf1r1295     | Mus musculus olfactory receptor 1295 (Olf1r1295), mRNA.                                                                                  |
| -2.11 | Gm5973        | predicted gene 5973 [gene_biotype:processed_pseudogene transcript_biotype:processed_pseudogene]                                          |
| -2.11 | Gm24928       | predicted gene, 24928 [gene_biotype:snRNA transcript_biotype:snRNA]                                                                      |
| -2.11 | Gm17555       | predicted gene, 17555 [gene_biotype:protein_coding transcript_biotype:protein_coding]                                                    |
| -2.11 | ---           | Non-coding transcript identified by NONCODE: Linc                                                                                        |
| -2.11 | ---           | Non-coding transcript identified by NONCODE: Linc                                                                                        |
| -2.11 | Gm25283       | predicted gene, 25283                                                                                                                    |
| -2.11 | Gm23000       | predicted gene, 23000 [gene_biotype:snRNA transcript_biotype:snRNA]                                                                      |
| -2.11 | Gm23402       | predicted gene, 23402 [gene_biotype:snRNA transcript_biotype:snRNA]                                                                      |
| -2.11 | Gm25450       | predicted gene, 25450 [gene_biotype:snRNA transcript_biotype:snRNA]                                                                      |
| -2.11 | ---           | Non-coding transcript identified by NONCODE: Sense No Exonic                                                                             |
| -2.11 | ---           | Non-coding transcript identified by Luo, et al.                                                                                          |
| -2.11 | Vmn2r-ps16    | vomer nasal 2, receptor, pseudogene 16 [gene_biotype:unprocessed_pseudogene transcript_biotype:unprocessed_pseudogene]                   |
| -2.11 | Usp17lc       | Mus musculus ubiquitin specific peptidase 17-like C (Usp17lc), mRNA.                                                                     |
| -2.11 | Gm14520       | predicted gene 14520 [gene_biotype:processed_pseudogene transcript_biotype:processed_pseudogene]                                         |
| -2.11 | Gm25593       | predicted gene, 25593 [gene_biotype:miRNA transcript_biotype:miRNA]                                                                      |
| -2.11 | Gm24856       | predicted gene, 24856 [gene_biotype:snRNA transcript_biotype:snRNA]                                                                      |
| -2.11 | Gm23144       | predicted gene, 23144 [gene_biotype:snRNA transcript_biotype:snRNA]                                                                      |
| -2.11 | ---           | Non-coding transcript identified by NONCODE: Sense No Exonic                                                                             |
| -2.11 | Gm23092       | predicted gene, 23092 [gene_biotype:snRNA transcript_biotype:snRNA]                                                                      |
| -2.11 | Gm24242       | predicted gene, 24242 [gene_biotype:snRNA transcript_biotype:snRNA]                                                                      |
| -2.11 | ---           | Mus musculus heterogeneous nuclear ribonucleoprotein A1-like 2, mRNA (cDNA clone MGC:198752 IMAGE:9054333), complete cds.                |
| -2.11 | ---           | Non-coding transcript identified by NONCODE: Sense No Exonic                                                                             |
| -2.11 | ---           | Non-coding transcript identified by NONCODE: Linc                                                                                        |
| -2.12 | Gm23727       | predicted gene, 23727 [gene_biotype:snRNA transcript_biotype:snRNA]                                                                      |
| -2.12 | ---           | Non-coding transcript identified by NONCODE: Linc                                                                                        |
| -2.12 | Mir6985       | Mus musculus microRNA 6985 (Mir6985), microRNA.                                                                                          |
| -2.12 | ---           | Non-coding transcript identified by NONCODE: Sense No Exonic                                                                             |
| -2.12 | ---           | Non-coding transcript identified by NONCODE: Linc                                                                                        |
| -2.12 | ---           | Non-coding transcript identified by NONCODE: Linc                                                                                        |
| -2.12 | Gm24319       | predicted gene, 24319 [gene_biotype:snRNA transcript_biotype:snRNA]                                                                      |
| -2.12 | ---           | Mus musculus non-coding RNA, oocyte clustered small RNA5248, complete sequence.                                                          |
| -2.12 | ---           | Mus musculus non-coding RNA, oocyte clustered small RNA5244, complete sequence.                                                          |
| -2.12 | ---           | Mus musculus non-coding RNA, oocyte clustered small RNA5244, complete sequence.                                                          |
| -2.12 | ---           | Mus musculus non-coding RNA, oocyte clustered small RNA5248, complete sequence.                                                          |
| -2.12 | ---           | Mus musculus non-coding RNA, oocyte clustered small RNA5248, complete sequence.                                                          |
| -2.12 | Gm15188       | predicted gene 15188 [gene_biotype:unprocessed_pseudogene transcript_biotype:unprocessed_pseudogene]                                     |
| -2.12 | Gm22474       | predicted gene, 22474 [gene_biotype:snRNA transcript_biotype:snRNA]                                                                      |
| -2.12 | Rny1          | RNA, Y1 small cytoplasmic, Ro-associated                                                                                                 |
| -2.12 | ---           | Non-coding transcript identified by Luo, et al.                                                                                          |
| -2.13 | Mir680-3      | Mus musculus microRNA 680-3 (Mir680-3), microRNA.                                                                                        |
| -2.13 | Gm23140       | predicted gene, 23140 [gene_biotype:snRNA transcript_biotype:snRNA]                                                                      |
| -2.13 | Gm8840        | predicted gene 8840 [gene_biotype:processed_pseudogene transcript_biotype:processed_pseudogene]                                          |
| -2.13 | Gm25263       | predicted gene, 25263 [gene_biotype:miRNA transcript_biotype:miRNA]                                                                      |
| -2.13 | ---           | Non-coding transcript identified by NONCODE: Sense No Exonic                                                                             |
| -2.13 | Gm10222       | predicted gene 10222 [gene_biotype:unprocessed_pseudogene transcript_biotype:unprocessed_pseudogene]                                     |
| -2.13 | Olf1r685      | Mus musculus olfactory receptor 685 (Olf1r685), mRNA.                                                                                    |
| -2.13 | Gm25327       | predicted gene, 25327 [gene_biotype:snRNA transcript_biotype:snRNA]                                                                      |
| -2.13 | ---           | Non-coding transcript identified by NONCODE: Sense No Exonic                                                                             |
| -2.13 | ---           | Non-coding transcript identified by NONCODE: Sense No Exonic                                                                             |
| -2.13 | Gm12515       | predicted gene 12515 [gene_biotype:processed_pseudogene transcript_biotype:processed_pseudogene]                                         |
| -2.13 | Snord43       | Mus musculus small nucleolar RNA, C/D box 43 (Snord43), small nucleolar RNA.                                                             |
| -2.13 | Tex38         | Mus musculus testis expressed 38 (Tex38), mRNA.                                                                                          |
| -2.13 | Gm12025       | predicted gene 12025 [gene_biotype:processed_pseudogene transcript_biotype:processed_pseudogene]                                         |
| -2.13 | ---           | Non-coding transcript identified by Luo, et al.                                                                                          |
| -2.13 | Gm11246       | predicted gene 11246 [gene_biotype:processed_pseudogene transcript_biotype:processed_pseudogene]                                         |
| -2.13 | Rps19-ps6     | ribosomal protein S19, pseudogene 6 [gene_biotype:processed_pseudogene transcript_biotype:processed_pseudogene]                          |
| -2.13 | ---           | Non-coding transcript identified by Luo, et al.                                                                                          |
| -2.14 | ---           | Non-coding transcript identified by NONCODE: Linc                                                                                        |
| -2.14 | Gm23918       | predicted gene, 23918 [gene_biotype:rRNA transcript_biotype:rRNA]                                                                        |
| -2.14 | Gm22224       | predicted gene, 22224 [gene_biotype:rRNA transcript_biotype:rRNA]                                                                        |
| -2.14 | ---           | Non-coding transcript identified by NONCODE: Antisense                                                                                   |
| -2.14 | Gm24249       | predicted gene, 24249 [gene_biotype:snRNA transcript_biotype:snRNA]                                                                      |
| -2.14 | Gm26501       | predicted gene, 26501 [gene_biotype:snRNA transcript_biotype:snRNA]                                                                      |
| -2.14 | 1700031L13Rik | PREDICTED: RIKEN cDNA 1700031L13 gene (1700031L13Rik), miscRNA.                                                                          |
| -2.14 | Gm4202        | predicted gene 4202 [gene_biotype:processed_pseudogene transcript_biotype:processed_pseudogene]                                          |
| -2.14 | Gm25007       | predicted gene, 25007 [gene_biotype:snRNA transcript_biotype:snRNA]                                                                      |
| -2.14 | ---           | Non-coding transcript identified by NONCODE: Antisense                                                                                   |
| -2.14 | Polr2k-ps     | polymerase (RNA) II (DNA directed) polypeptide K, pseudogene [gene_biotype:processed_pseudogene transcript_biotype:processed_pseudogene] |

|       |            |                                                                                                                                                 |
|-------|------------|-------------------------------------------------------------------------------------------------------------------------------------------------|
| -2.14 | Gm26297    | predicted gene, 26297 [gene_biotype:snoRNA transcript_biotype:snoRNA]                                                                           |
| -2.14 | Gm23714    | predicted gene, 23714 [gene_biotype:snRNA transcript_biotype:snRNA]                                                                             |
| -2.14 | Gm23607    | predicted gene, 23607 [gene_biotype:snoRNA transcript_biotype:snoRNA]                                                                           |
| -2.14 | Mir691     | Mus musculus microRNA 691 (Mir691), microRNA.                                                                                                   |
| -2.14 | ---        | Non-coding transcript identified by NONCODE: Linc                                                                                               |
| -2.14 | ---        | Non-coding transcript identified by NONCODE: Linc                                                                                               |
| -2.14 | ---        | Non-coding transcript identified by Luo, et al.                                                                                                 |
| -2.14 | ---        | Mus musculus non-coding RNA, oocyte_clustered_small_RNA11998, complete sequence.                                                                |
| -2.14 | Gm8300     | Mus musculus predicted gene 8300 (Gm8300), mRNA.                                                                                                |
| -2.14 | Gm14292    | predicted gene 14292 [gene_biotype:processed_pseudogene transcript_biotype:processed_pseudogene]                                                |
| -2.15 | ---        | Non-coding transcript identified by NONCODE: Linc                                                                                               |
| -2.15 | ---        | Non-coding transcript identified by NONCODE: Sense No Exonic                                                                                    |
| -2.15 | Gm25815    | predicted gene, 25815 [gene_biotype:snRNA transcript_biotype:snRNA]                                                                             |
| -2.15 | Gm23132    | predicted gene, 23132 [gene_biotype:snoRNA transcript_biotype:snoRNA]                                                                           |
| -2.15 | Gm24997    | predicted gene, 24997 [gene_biotype:snRNA transcript_biotype:snRNA]                                                                             |
| -2.15 | Mir483     | Mus musculus microRNA 483 (Mir483), microRNA.                                                                                                   |
| -2.15 | Gm11408    | predicted gene 11408 [gene_biotype:processed_pseudogene transcript_biotype:processed_pseudogene]                                                |
| -2.15 | ---        | Non-coding transcript identified by NONCODE: Sense No Exonic                                                                                    |
| -2.15 | Gm25448    | predicted gene, 25448 [gene_biotype:snRNA transcript_biotype:snRNA]                                                                             |
| -2.15 | Gm24713    | predicted gene, 24713 [gene_biotype:snRNA transcript_biotype:snRNA]                                                                             |
| -2.15 | Gm7973     | predicted gene 7973 [gene_biotype:processed_pseudogene transcript_biotype:processed_pseudogene]                                                 |
| -2.15 | ---        | Mus musculus non-coding RNA, oocyte_clustered_small_RNA12929, complete sequence.                                                                |
| -2.15 | ---        | Non-coding transcript identified by NONCODE: Linc                                                                                               |
| -2.15 | ---        | Non-coding transcript identified by NONCODE: Linc                                                                                               |
| -2.15 | Gm11484    | predicted gene 11484 [gene_biotype:processed_pseudogene transcript_biotype:processed_pseudogene]                                                |
| -2.15 | ---        | Non-coding transcript identified by NONCODE: Linc                                                                                               |
| -2.15 | ---        | Non-coding transcript identified by NONCODE: Linc                                                                                               |
| -2.15 | Gm23731    | predicted gene, 23731 [gene_biotype:snRNA transcript_biotype:snRNA]                                                                             |
| -2.16 | Gm14519    | predicted gene 14519 [gene_biotype:processed_pseudogene transcript_biotype:processed_pseudogene]                                                |
| -2.16 | Usp30      | ubiquitin specific peptidase 30 [gene_biotype:protein_coding transcript_biotype:processed_transcript]                                           |
| -2.16 | Gm13509    | predicted gene 13509 [gene_biotype:processed_pseudogene transcript_biotype:processed_pseudogene]                                                |
| -2.16 | ---        | Non-coding transcript identified by NONCODE: Linc                                                                                               |
| -2.16 | ---        | Non-coding transcript identified by NONCODE: Linc                                                                                               |
| -2.16 | Gm22770    | predicted gene, 22770 [gene_biotype:snRNA transcript_biotype:snRNA]                                                                             |
| -2.16 | Gm14398    | predicted gene 14398 [gene_biotype:processed_pseudogene transcript_biotype:processed_pseudogene]                                                |
| -2.16 | ---        | Non-coding transcript identified by NONCODE: Linc                                                                                               |
| -2.16 | ---        | Non-coding transcript identified by Luo, et al.                                                                                                 |
| -2.16 | ---        | Non-coding transcript identified by NONCODE: Sense No Exonic                                                                                    |
| -2.16 | Gm26684    | predicted gene, 26684 [gene_biotype:lincRNA transcript_biotype:lincRNA]                                                                         |
| -2.16 | Gm6491     | predicted gene 6491 [gene_biotype:processed_pseudogene transcript_biotype:processed_pseudogene]                                                 |
| -2.16 | Gm23040    | predicted gene, 23040 [gene_biotype:snRNA transcript_biotype:snRNA]                                                                             |
| -2.16 | ---        | Non-coding transcript identified by NONCODE: Sense No Exonic                                                                                    |
| -2.17 | Gm15030    | predicted gene 15030 [gene_biotype:processed_pseudogene transcript_biotype:processed_pseudogene]                                                |
| -2.17 | Gm24762    | predicted gene, 24762 [gene_biotype:snRNA transcript_biotype:snRNA]                                                                             |
| -2.17 | Olf1293-ps | olfactory receptor 1293, pseudogene                                                                                                             |
| -2.17 | ---        | Non-coding transcript identified by NONCODE: Sense No Exonic                                                                                    |
| -2.17 | Gm13831    | predicted gene 13831 [gene_biotype:processed_pseudogene transcript_biotype:processed_pseudogene]                                                |
| -2.17 | Hist1h2ba  | Mus musculus histone cluster 1, H2ba (Hist1h2ba), mRNA.                                                                                         |
| -2.17 | Gm23376    | predicted gene, 23376 [gene_biotype:snRNA transcript_biotype:snRNA]                                                                             |
| -2.17 | Gm25801    | predicted gene, 25801 [gene_biotype:snRNA transcript_biotype:snRNA]                                                                             |
| -2.17 | Smt3h2-ps2 | SMT3 suppressor of mif two 3 homolog 2, pseudogene 2 (S. cerevisiae)[gene_biotype:processed_pseudogene transcript_biotype:processed_pseudogene] |
| -2.17 | ---        | Non-coding transcript identified by NONCODE: Linc                                                                                               |
| -2.17 | Gm24830    | predicted gene, 24830 [gene_biotype:snRNA transcript_biotype:snRNA]                                                                             |
| -2.17 | Gm26232    | predicted gene, 26232 [gene_biotype:snRNA transcript_biotype:snRNA]                                                                             |
| -2.17 | Rnu1b6     | U1b6 small nuclear RNA                                                                                                                          |
| -2.17 | Gm13149    | predicted gene 13149                                                                                                                            |
| -2.17 | Gm26189    | predicted gene, 26189 [gene_biotype:snRNA transcript_biotype:snRNA]                                                                             |
| -2.17 | Gm16180    | predicted gene 16180 [gene_biotype:antisense transcript_biotype:antisense]                                                                      |
| -2.17 | Gm23814    | predicted gene, 23814 [gene_biotype:snRNA transcript_biotype:snRNA]                                                                             |
| -2.17 | Gm22950    | predicted gene, 22950 [gene_biotype:snRNA transcript_biotype:snRNA]                                                                             |
| -2.17 | Gm23435    | predicted gene, 23435 [gene_biotype:snRNA transcript_biotype:snRNA]                                                                             |
| -2.17 | Gm13475    | predicted gene 13475 [gene_biotype:processed_pseudogene transcript_biotype:processed_pseudogene]                                                |
| -2.17 | Gm24445    | predicted gene, 24445 [gene_biotype:snRNA transcript_biotype:snRNA]                                                                             |
| -2.17 | ---        | Non-coding transcript identified by NONCODE: Antisense                                                                                          |
| -2.18 | ---        | Non-coding transcript identified by NONCODE: Sense No Exonic                                                                                    |
| -2.18 | ---        | Non-coding transcript identified by NONCODE: Sense No Exonic                                                                                    |
| -2.18 | Mir467b    | Mus musculus microRNA 467b (Mir467b), microRNA.                                                                                                 |
| -2.18 | Mir6960    | Mus musculus microRNA 6960 (Mir6960), microRNA.                                                                                                 |
| -2.18 | Gm8539     | PREDICTED: predicted gene 8539 (Gm8539), mRNA.                                                                                                  |
| -2.18 | ---        | Non-coding transcript identified by NONCODE: Linc                                                                                               |
| -2.18 | Gm14607    | predicted gene 14607 [gene_biotype:processed_pseudogene transcript_biotype:processed_pseudogene]                                                |
| -2.18 | Gm23445    | predicted gene, 23445 [gene_biotype:snRNA transcript_biotype:snRNA]                                                                             |
| -2.18 | Gm17197    | predicted gene 17197 [gene_biotype:antisense transcript_biotype:antisense]                                                                      |
| -2.18 | ---        | Non-coding transcript identified by Luo, et al.                                                                                                 |
| -2.18 | ---        | Non-coding transcript identified by NONCODE: Sense No Exonic                                                                                    |
| -2.18 | ---        | Non-coding transcript identified by NONCODE: Linc                                                                                               |
| -2.18 | Gm24456    | predicted gene, 24456 [gene_biotype:snRNA transcript_biotype:snRNA]                                                                             |



|       |               |                                                                                                                                      |
|-------|---------------|--------------------------------------------------------------------------------------------------------------------------------------|
| -2.18 | Gm23229       | predicted gene, 23229 [gene_biotype:snRNA transcript_biotype:snRNA]                                                                  |
| -2.18 | Gm13419       | predicted gene 13419 [gene_biotype:processed_pseudogene transcript_biotype:processed_pseudogene]                                     |
| -2.18 | ---           | Non-coding transcript identified by NONCODE: Linc                                                                                    |
| -2.19 | ---           | Non-coding transcript identified by NONCODE: Sense No Exonic                                                                         |
| -2.19 | Hnrnpa0       | Mus musculus heterogeneous nuclear ribonucleoprotein A0 (Hnrnpa0), mRNA.                                                             |
| -2.19 | ---           | Mus musculus non-coding RNA, oocyte_clustered_small_RNA12005, complete sequence.                                                     |
| -2.19 | ---           | Non-coding transcript identified by NONCODE: Linc                                                                                    |
| -2.19 | Gm22424       | predicted gene, 22424 [gene_biotype:snoRNA transcript_biotype:snoRNA]                                                                |
| -2.19 | ---           | Non-coding transcript identified by NONCODE: Antisense                                                                               |
| -2.19 | Rpl9-ps1      | ribosomal protein L9, pseudogene 1 [gene_biotype:translated_processed_pseudogene transcript_biotype:translated_processed_pseudogene] |
| -2.19 | Gm10015       | predicted gene 10015                                                                                                                 |
| -2.19 | Snord93       | Mus musculus small nucleolar RNA, C/D box 93 (Snord93), small nucleolar RNA.                                                         |
| -2.19 | H3f3a-ps1     | H3 histone, family 3A, pseudogene 1 [gene_biotype:processed_pseudogene transcript_biotype:processed_pseudogene]                      |
| -2.20 | ---           | Non-coding transcript identified by NONCODE: Sense No Exonic                                                                         |
| -2.20 | Gm26430       | predicted gene, 26430 [gene_biotype:snRNA transcript_biotype:snRNA]                                                                  |
| -2.20 | ---           | Non-coding transcript identified by NONCODE: Sense No Exonic                                                                         |
| -2.20 | Gm12638       | predicted gene 12638 [gene_biotype:processed_pseudogene transcript_biotype:processed_pseudogene]                                     |
| -2.20 | LOC100862038  | PREDICTED: uncharacterized LOC100862038 (LOC100862038), partial mRNA.                                                                |
| -2.20 | Mir6930       | Mus musculus microRNA 6930 (Mir6930), microRNA.                                                                                      |
| -2.20 | Tpd52-ps      | tumor protein D52, pseudogene [gene_biotype:pseudogene transcript_biotype:pseudogene]                                                |
| -2.20 | Mir7055       | Mus musculus microRNA 7055 (Mir7055), microRNA.                                                                                      |
| -2.20 | Gm22249       | predicted gene, 22249 [gene_biotype:snRNA transcript_biotype:snRNA]                                                                  |
| -2.20 | ---           | Mus musculus piRNA piR-1811, complete sequence.                                                                                      |
| -2.20 | ---           | Non-coding transcript identified by NONCODE: Sense No Exonic                                                                         |
| -2.21 | Gm22689       | predicted gene, 22689 [gene_biotype:miRNA transcript_biotype:miRNA]                                                                  |
| -2.21 | Cd68          | CD68 antigen (Cd68), mRNA.                                                                                                           |
| -2.21 | Gm27449       | predicted gene, 27449 [gene_biotype:snRNA transcript_biotype:snRNA]                                                                  |
| -2.21 | ---           | Non-coding transcript identified by NONCODE: Sense No Exonic                                                                         |
| -2.21 | Gm23928       | predicted gene, 23928 [gene_biotype:snRNA transcript_biotype:snRNA]                                                                  |
| -2.21 | ---           | Non-coding transcript identified by NONCODE: Sense No Exonic                                                                         |
| -2.21 | Gm25358       | predicted gene, 25358 [gene_biotype:rRNA transcript_biotype:rRNA]                                                                    |
| -2.21 | Gm24509       | predicted gene, 24509 [gene_biotype:rRNA transcript_biotype:rRNA]                                                                    |
| -2.21 | Olf1r1144-ps1 | olfactory receptor 1144, pseudogene 1                                                                                                |
| -2.21 | Gm13331       | predicted gene 13331 [gene_biotype:processed_pseudogene transcript_biotype:processed_pseudogene]                                     |
| -2.21 | ---           | Mus musculus non-coding RNA, oocyte_clustered_small_RNA4921, complete sequence.                                                      |
| -2.21 | Gm26338       | predicted gene, 26338 [gene_biotype:miRNA transcript_biotype:miRNA]                                                                  |
| -2.21 | Gm25699       | predicted gene, 25699 [gene_biotype:snRNA transcript_biotype:snRNA]                                                                  |
| -2.22 | Gm15214       | predicted gene 15214 [gene_biotype:processed_pseudogene transcript_biotype:processed_pseudogene]                                     |
| -2.22 | Mir16-2       | Mus musculus microRNA 16-2 (Mir16-2), microRNA.                                                                                      |
| -2.22 | ---           | Non-coding transcript identified by NONCODE: Antisense                                                                               |
| -2.22 | ---           | Mus musculus non-coding RNA, oocyte_clustered_small_RNA6304, complete sequence.                                                      |
| -2.22 | ---           | Mus musculus non-coding RNA, oocyte_clustered_small_RNA6308, complete sequence.                                                      |
| -2.22 | ---           | Non-coding transcript identified by NONCODE: Linc                                                                                    |
| -2.22 | Gm3221        | predicted gene 3221 [gene_biotype:unprocessed_pseudogene transcript_biotype:unprocessed_pseudogene]                                  |
| -2.22 | Gm23149       | predicted gene, 23149                                                                                                                |
| -2.22 | Gm25785       | predicted gene, 25785 [gene_biotype:snRNA transcript_biotype:snRNA]                                                                  |
| -2.22 | Rnu6-ps2      | U6 small nuclear RNA, pseudogene 2 [gene_biotype:snRNA transcript_biotype:snRNA]                                                     |
| -2.22 | Gm23191       | predicted gene, 23191 [gene_biotype:snRNA transcript_biotype:snRNA]                                                                  |
| -2.23 | Gm26404       | predicted gene, 26404 [gene_biotype:snoRNA transcript_biotype:snoRNA]                                                                |
| -2.23 | ---           | Non-coding transcript identified by NONCODE: Sense No Exonic                                                                         |
| -2.23 | Gm25935       | predicted gene, 25935 [gene_biotype:snRNA transcript_biotype:snRNA]                                                                  |
| -2.23 | Gm10643       | predicted gene 10643                                                                                                                 |
| -2.23 | Prss3         | Mus musculus protease, serine 3 (Prss3), mRNA.                                                                                       |
| -2.23 | ---           | Non-coding transcript identified by NONCODE: Sense No Exonic                                                                         |
| -2.23 | ---           | Non-coding transcript identified by NONCODE: Sense No Exonic                                                                         |
| -2.23 | Gm12820       | predicted gene 12820 [gene_biotype:processed_pseudogene transcript_biotype:processed_pseudogene]                                     |
| -2.23 | ---           | Non-coding transcript identified by NONCODE: Linc                                                                                    |
| -2.23 | ---           | Non-coding transcript identified by Luo, et al.                                                                                      |
| -2.23 | ---           | Mus musculus non-coding RNA, oocyte_clustered_small_RNA13072, complete sequence.                                                     |
| -2.23 | Gm23627       | predicted gene, 23627 [gene_biotype:snRNA transcript_biotype:snRNA]                                                                  |
| -2.23 | Gm23816       | predicted gene, 23816 [gene_biotype:snoRNA transcript_biotype:snoRNA]                                                                |
| -2.23 | Gm23725       | predicted gene, 23725 [gene_biotype:snRNA transcript_biotype:snRNA]                                                                  |
| -2.23 | Gm22945       | predicted gene, 22945 [gene_biotype:snRNA transcript_biotype:snRNA]                                                                  |
| -2.24 | ---           | Non-coding transcript identified by NONCODE: Linc                                                                                    |
| -2.24 | ---           | Mus musculus piRNA piR-6897, complete sequence.                                                                                      |
| -2.24 | ---           | Non-coding transcript identified by NONCODE: Sense No Exonic                                                                         |
| -2.24 | Itpa-ps3      | inosine triphosphatase (nucleoside triphosphate pyrophosphatase) pseudogene 3 [gene_biotype:                                         |
| -2.24 | ---           | Non-coding transcript identified by Luo, et al.                                                                                      |
| -2.24 | pRNA          | NoRC associated RNA, pRNA                                                                                                            |
| -2.24 | Gm23981       | predicted gene, 23981 [gene_biotype:snRNA transcript_biotype:snRNA]                                                                  |
| -2.24 | Gm24545       | predicted gene, 24545                                                                                                                |
| -2.24 | ---           | Non-coding transcript identified by NONCODE: Sense No Exonic                                                                         |
| -2.24 | Gm24399       | predicted gene, 24399 [gene_biotype:snRNA transcript_biotype:snRNA]                                                                  |
| -2.24 | Gm25039       | predicted gene, 25039 [gene_biotype:snRNA transcript_biotype:snRNA]                                                                  |
| -2.24 | ---           | Non-coding transcript identified by NONCODE: Linc                                                                                    |
| -2.25 | Gm26217       | predicted gene, 26217 [gene_biotype:miRNA transcript_biotype:miRNA]                                                                  |
| -2.25 | Olf1226       | Mus musculus olfactory receptor 1226 (Olf1226), mRNA.                                                                                |

|       |               |                                                                                                                                |
|-------|---------------|--------------------------------------------------------------------------------------------------------------------------------|
| -2.25 | ---           | Non-coding transcript identified by NONCODE: Antisense                                                                         |
| -2.25 | Mir5615-2     | Mus musculus microRNA 5615-2 (Mir5615-2), microRNA.                                                                            |
| -2.25 | Rpl31-ps15    | ribosomal protein L31, pseudogene 15[ <i>gene_biotype:processed_pseudogene transcript_biotype:processed_pseudogene</i> ]       |
| -2.25 | Gm13603       | predicted gene 13603 [ <i>gene_biotype:processed_pseudogene transcript_biotype:processed_pseudogene</i> ]                      |
| -2.25 | Gm23503       | predicted gene, 23503 [ <i>gene_biotype:snRNA transcript_biotype:snRNA</i> ]                                                   |
| -2.25 | ---           | Non-coding transcript identified by NONCODE: Sense No Exonic                                                                   |
| -2.25 | Gm14813       | predicted gene 14813 [ <i>gene_biotype:processed_pseudogene transcript_biotype:processed_pseudogene</i> ]                      |
| -2.25 | Gm26122       | predicted gene, 26122 [ <i>gene_biotype:snRNA transcript_biotype:snRNA</i> ]                                                   |
| -2.26 | Gm22951       | predicted gene, 22951 [ <i>gene_biotype:snRNA transcript_biotype:snRNA</i> ]                                                   |
| -2.26 | ---           | Non-coding transcript identified by NONCODE: Linc                                                                              |
| -2.26 | Gm12412       | predicted gene 12412 [ <i>gene_biotype:processed_pseudogene transcript_biotype:processed_pseudogene</i> ]                      |
| -2.26 | ---           | Non-coding transcript identified by Luo, et al.                                                                                |
| -2.26 | LOC100862187  | PREDICTED: uncharacterized LOC100862187 (LOC100862187), miscRNA.                                                               |
| -2.26 | Gm25939       | predicted gene, 25939 [ <i>gene_biotype:snRNA transcript_biotype:snRNA</i> ]                                                   |
| -2.26 | Gm23434       | predicted gene, 23434 [ <i>gene_biotype:snRNA transcript_biotype:snRNA</i> ]                                                   |
| -2.26 | Gm23628       | predicted gene, 23628 [ <i>gene_biotype:snRNA transcript_biotype:snRNA</i> ]                                                   |
| -2.26 | ---           | Non-coding transcript identified by NONCODE: Sense No Exonic                                                                   |
| -2.26 | Gtf2e1        | Mus musculus general transcription factor II E, polypeptide 1 (alpha subunit) (Gtf2e1), mRNA.                                  |
| -2.26 | Gm25572       | predicted gene, 25572 [ <i>gene_biotype:snRNA transcript_biotype:snRNA</i> ]                                                   |
| -2.26 | Amd-ps4       | S-adenosylmethionine decarboxylase, pseudogene 4                                                                               |
| -2.26 | Gm23151       | predicted gene, 23151 [ <i>gene_biotype:snRNA transcript_biotype:snRNA</i> ]                                                   |
| -2.26 | Gm15263       | predicted gene 15263 [ <i>gene_biotype:processed_pseudogene transcript_biotype:processed_pseudogene</i> ]                      |
| -2.26 | Gm3279        | Mus musculus predicted gene 3279 (Gm3279), long non-coding RNA.                                                                |
| -2.26 | ---           | Non-coding transcript identified by Luo, et al.                                                                                |
| -2.26 | Gm23904       | predicted gene, 23904 [ <i>gene_biotype:snoRNA transcript_biotype:snoRNA</i> ]                                                 |
| -2.27 | Mir466d       | Mus musculus microRNA 466d (Mir466d), microRNA.                                                                                |
| -2.27 | Mir6938       | Mus musculus microRNA 6938 (Mir6938), microRNA.                                                                                |
| -2.27 | Gm25464       | predicted gene, 25464 [ <i>gene_biotype:snRNA transcript_biotype:snRNA</i> ]                                                   |
| -2.27 | Mir98         | Mus musculus microRNA 98 (Mir98), microRNA.                                                                                    |
| -2.27 | Gm25642       | predicted gene, 25642 [ <i>gene_biotype:miRNA transcript_biotype:miRNA</i> ]                                                   |
| -2.27 | Gm26054       | predicted gene, 26054 [ <i>gene_biotype:snRNA transcript_biotype:snRNA</i> ]                                                   |
| -2.27 | ---           | Non-coding transcript identified by NONCODE: Sense No Exonic                                                                   |
| -2.27 | Rnu1b2        | Mus musculus U1b2 small nuclear RNA (Rnu1b2), small nuclear RNA.                                                               |
| -2.27 | Rnu1b1        | Mus musculus U1b1 small nuclear RNA (Rnu1b1), small nuclear RNA.                                                               |
| -2.27 | ---           | Non-coding transcript identified by NONCODE: Antisense                                                                         |
| -2.27 | Vmn1r167      | Mus musculus vomeronasal 1 receptor 167 (Vmn1r167), mRNA.                                                                      |
| -2.27 | Gm25826       | predicted gene, 25826 [ <i>gene_biotype:snoRNA transcript_biotype:snoRNA</i> ]                                                 |
| -2.27 | Gm12315       | predicted gene 12315 [ <i>gene_biotype:lincRNA transcript_biotype:lincRNA</i> ]                                                |
| -2.27 | Mir5100       | Mus musculus microRNA 5100 (Mir5100), microRNA.                                                                                |
| -2.27 | Mir15a        | Mus musculus microRNA 15a (Mir15a), microRNA.                                                                                  |
| -2.27 | Gm11488       | predicted gene 11488 [ <i>gene_biotype:processed_pseudogene transcript_biotype:processed_pseudogene</i> ]                      |
| -2.27 | Gm22381       | predicted gene, 22381 [ <i>gene_biotype:snRNA transcript_biotype:snRNA</i> ]                                                   |
| -2.27 | Gm24333       | predicted gene, 24333 [ <i>gene_biotype:miRNA transcript_biotype:miRNA</i> ]                                                   |
| -2.28 | ---           | Non-coding transcript identified by NONCODE: Antisense                                                                         |
| -2.28 | Rnu1b6        | Mus musculus U1b6 small nuclear RNA (Rnu1b6), small nuclear RNA.                                                               |
| -2.28 | Gm26166       | predicted gene, 26166 [ <i>gene_biotype:snRNA transcript_biotype:snRNA</i> ]                                                   |
| -2.28 | Gm23407       | predicted gene, 23407 [ <i>gene_biotype:snRNA transcript_biotype:snRNA</i> ]                                                   |
| -2.28 | Gm23622       | predicted gene, 23622 [ <i>gene_biotype:snRNA transcript_biotype:snRNA</i> ]                                                   |
| -2.28 | ---           | Non-coding transcript identified by NONCODE: Sense No Exonic                                                                   |
| -2.28 | 3222401L13Rik | RIKEN cDNA 3222401L13 gene                                                                                                     |
| -2.28 | Vmn2r-ps17    | vomeronasal 2, receptor, pseudogene 17[ <i>gene_biotype:unprocessed_pseudogene transcript_biotype:unprocessed_pseudogene</i> ] |
| -2.28 | Olf1322       | Mus musculus olfactory receptor 1322 (Olf1322), mRNA.                                                                          |
| -2.28 | ---           | Non-coding transcript identified by Luo, et al.                                                                                |
| -2.28 | Gm25618       | predicted gene, 25618 [ <i>gene_biotype:snRNA transcript_biotype:snRNA</i> ]                                                   |
| -2.28 | ---           | Non-coding transcript identified by NONCODE: Sense No Exonic                                                                   |
| -2.28 | ---           | Non-coding transcript identified by NONCODE: Sense No Exonic                                                                   |
| -2.28 | Gm22113       | predicted gene, 22113 [ <i>gene_biotype:snRNA transcript_biotype:snRNA</i> ]                                                   |
| -2.29 | Gm23671       | predicted gene, 23671                                                                                                          |
| -2.29 | Gm25516       | predicted gene, 25516 [ <i>gene_biotype:snRNA transcript_biotype:snRNA</i> ]                                                   |
| -2.29 | Gm9795        | predicted pseudogene 9795 [ <i>gene_biotype:processed_pseudogene transcript_biotype:processed_pseudogene</i> ]                 |
| -2.29 | Rpl15-ps2     | ribosomal protein L15, pseudogene 2[ <i>gene_biotype:processed_pseudogene transcript_biotype:processed_pseudogene</i> ]        |
| -2.29 | ---           | Non-coding transcript identified by NONCODE: Antisense                                                                         |
| -2.29 | ---           | Non-coding transcript identified by NONCODE: Linc                                                                              |
| -2.29 | ---           | Non-coding transcript identified by NONCODE: Linc                                                                              |
| -2.29 | ---           | Non-coding transcript identified by Luo, et al.                                                                                |
| -2.30 | ---           | Non-coding transcript identified by NONCODE: Linc                                                                              |
| -2.30 | Rgs16         | Mus musculus regulator of G-protein signaling 16 (Rgs16), mRNA.                                                                |
| -2.30 | Gm12075       | predicted gene 12075 [ <i>gene_biotype:processed_pseudogene transcript_biotype:processed_pseudogene</i> ]                      |
| -2.30 | Mir6375       | Mus musculus microRNA 6375 (Mir6375), microRNA.                                                                                |
| -2.30 | ---           | Non-coding transcript identified by NONCODE: Linc                                                                              |
| -2.30 | ---           | Non-coding transcript identified by NONCODE: Sense No Exonic                                                                   |
| -2.30 | Gm25683       | predicted gene, 25683 [ <i>gene_biotype:snoRNA transcript_biotype:snoRNA</i> ]                                                 |
| -2.30 | ---           | Non-coding transcript identified by NONCODE: Sense No Exonic                                                                   |
| -2.30 | Gm8151        | predicted gene 8151 [ <i>gene_biotype:processed_pseudogene transcript_biotype:processed_pseudogene</i> ]                       |
| -2.30 | Slc43a3       | Mus musculus solute carrier family 43, member 3 (Slc43a3), mRNA.                                                               |
| -2.30 | Mir138-1      | Mus musculus microRNA 138-1 (Mir138-1), microRNA.                                                                              |
| -2.30 | Taar7e        | Mus musculus trace amine-associated receptor 7E (Taar7e), mRNA.                                                                |

|       |               |                                                                                                                     |
|-------|---------------|---------------------------------------------------------------------------------------------------------------------|
| -2.31 | Siae          | Mus musculus sialic acid acetyltransferase (Siae), mRNA.                                                            |
| -2.31 | Gm22482       | predicted gene, 22482                                                                                               |
| -2.31 | Cpa2          | Mus musculus carboxypeptidase A2, pancreatic (Cpa2), mRNA.                                                          |
| -2.31 | Gm13396       | predicted gene 13396 [gene_biotype:processed_pseudogene transcript_biotype:processed_pseudogene]                    |
| -2.31 | Oxsr1         | Mus musculus oxidative-stress responsive 1 (Oxsr1), transcript variant 1, mRNA.                                     |
| -2.31 | ---           | Non-coding transcript identified by NONCODE: Sense No Exonic                                                        |
| -2.31 | Gm8087        | predicted gene 8087 [gene_biotype:processed_pseudogene transcript_biotype:processed_pseudogene]                     |
| -2.31 | ---           | Non-coding transcript identified by NONCODE: Linc                                                                   |
| -2.31 | n-R5s159      | nuclear encoded rRNA 5S 159 [gene_biotype:rRNA transcript_biotype:rRNA]                                             |
| -2.31 | ---           | Non-coding transcript identified by NONCODE: Linc                                                                   |
| -2.31 | Olf178        | Mus musculus olfactory receptor 178 (Olf178), mRNA.                                                                 |
| -2.31 | Gm24113       | predicted gene, 24113                                                                                               |
| -2.31 | Gm9242        | predicted pseudogene 9242 [gene_biotype:protein_coding transcript_biotype:protein_coding]                           |
| -2.31 | ---           | Non-coding transcript identified by NONCODE: Linc                                                                   |
| -2.31 | Gm10179       | predicted gene 10179 [gene_biotype:pseudogene transcript_biotype:pseudogene]                                        |
| -2.31 | ---           | Mus musculus piRNA piR-115130, complete sequence.                                                                   |
| -2.32 | Gm23330       | predicted gene, 23330 [gene_biotype:snRNA transcript_biotype:snRNA]                                                 |
| -2.32 | ---           | Non-coding transcript identified by NONCODE: Linc                                                                   |
| -2.32 | ---           | Non-coding transcript identified by NONCODE: Linc                                                                   |
| -2.32 | Gm23083       | predicted gene, 23083 [gene_biotype:snoRNA transcript_biotype:snoRNA]                                               |
| -2.33 | ---           | Non-coding transcript identified by NONCODE: Linc                                                                   |
| -2.33 | ---           | Non-coding transcript identified by NONCODE: Linc                                                                   |
| -2.33 | ---           | Mus musculus piRNA piR-108089, complete sequence.                                                                   |
| -2.33 | Gm22756       | predicted gene, 22756 [gene_biotype:snRNA transcript_biotype:snRNA]                                                 |
| -2.33 | Gm22003       | predicted gene, 22003 [gene_biotype:snRNA transcript_biotype:snRNA]                                                 |
| -2.33 | Gm25978       | predicted gene, 25978 [gene_biotype:miRNA transcript_biotype:miRNA]                                                 |
| -2.33 | Gm14087       | predicted gene 14087                                                                                                |
| -2.33 | Gm25382       | predicted gene, 25382 [gene_biotype:snRNA transcript_biotype:snRNA]                                                 |
| -2.34 | Gm22229       | predicted gene, 22229 [gene_biotype:snRNA transcript_biotype:snRNA]                                                 |
| -2.34 | Gm15905       | predicted gene 15905 [gene_biotype:processed_pseudogene transcript_biotype:processed_pseudogene]                    |
| -2.34 | Gm15047       | predicted gene 15047 [gene_biotype:processed_pseudogene transcript_biotype:processed_pseudogene]                    |
| -2.34 | Gm10145       | predicted gene 10145                                                                                                |
| -2.34 | ---           | Non-coding transcript identified by NONCODE: Linc                                                                   |
| -2.34 | ---           | Non-coding transcript identified by NONCODE: Sense No Exonic                                                        |
| -2.34 | ---           | Non-coding transcript identified by NONCODE: Linc                                                                   |
| -2.34 | Gm23038       | predicted gene, 23038 [gene_biotype:snRNA transcript_biotype:snRNA]                                                 |
| -2.34 | Gm12123       | predicted gene 12123                                                                                                |
| -2.34 | Olf935        | Mus musculus olfactory receptor 935 (Olf935), mRNA.                                                                 |
| -2.34 | Gm23428       | predicted gene, 23428 [gene_biotype:snRNA transcript_biotype:snRNA]                                                 |
| -2.34 | Gm22308       | predicted gene, 22308 [gene_biotype:snRNA transcript_biotype:snRNA]                                                 |
| -2.34 | ---           | Non-coding transcript identified by Luo, et al.                                                                     |
| -2.34 | Gm9060        | predicted gene 9060 [gene_biotype:processed_pseudogene transcript_biotype:processed_pseudogene]                     |
| -2.35 | Gm25739       | predicted gene, 25739 [gene_biotype:snRNA transcript_biotype:snRNA]                                                 |
| -2.35 | Rny1          | Mus musculus RNA, Y1 small cytoplasmic, Ro-associated (Rny1), Y RNA.                                                |
| -2.35 | Gm26128       | predicted gene, 26128 [gene_biotype:snRNA transcript_biotype:snRNA]                                                 |
| -2.35 | ---           | Non-coding transcript identified by NONCODE: Linc                                                                   |
| -2.35 | Gm25788       | predicted gene, 25788 [gene_biotype:snoRNA transcript_biotype:snoRNA]                                               |
| -2.35 | 2310036O22Rik | Mus musculus RIKEN cDNA 2310036O22 gene (2310036O22Rik), mRNA.                                                      |
| -2.35 | ---           | Non-coding transcript identified by NONCODE: Linc                                                                   |
| -2.35 | Gm23538       | predicted gene, 23538 [gene_biotype:snRNA transcript_biotype:snRNA]                                                 |
| -2.35 | Ap3m1-ps      | adaptor-related protein complex 3, mu 1 subunit, pseudogene [gene_biotype:pseudogene transcript_biotype:pseudogene] |
| -2.35 | Gm13827       | predicted gene 13827                                                                                                |
| -2.35 | H3f3a-ps2     | H3 histone, family 3A, pseudogene 2 [gene_biotype:processed_pseudogene transcript_biotype:processed_pseudogene]     |
| -2.35 | Gm24813       | predicted gene, 24813 [gene_biotype:miRNA transcript_biotype:miRNA]                                                 |
| -2.35 | Cela3a        | Mus musculus chymotrypsin-like elastase family, member 3A (Cela3a), mRNA.                                           |
| -2.35 | Gm15900       | predicted gene 15900 [gene_biotype:processed_pseudogene transcript_biotype:processed_pseudogene]                    |
| -2.36 | ---           | Non-coding transcript identified by NONCODE: Antisense                                                              |
| -2.36 | Gm25799       | predicted gene, 25799 [gene_biotype:snRNA transcript_biotype:snRNA]                                                 |
| -2.36 | Gm13076       | predicted gene 13076 [gene_biotype:processed_pseudogene transcript_biotype:processed_pseudogene]                    |
| -2.36 | Gm26180       | predicted gene, 26180 [gene_biotype:snRNA transcript_biotype:snRNA]                                                 |
| -2.36 | Gm25518       | predicted gene, 25518 [gene_biotype:snRNA transcript_biotype:snRNA]                                                 |
| -2.36 | Gm26328       | predicted gene, 26328 [gene_biotype:snRNA transcript_biotype:snRNA]                                                 |
| -2.36 | Gm25732       | predicted gene, 25732 [gene_biotype:miRNA transcript_biotype:miRNA]                                                 |
| -2.36 | Gm13804       | predicted gene 13804 [gene_biotype:processed_pseudogene transcript_biotype:processed_pseudogene]                    |
| -2.36 | ---           | Non-coding transcript identified by NONCODE: Sense No Exonic                                                        |
| -2.36 | Gm24259       | predicted gene, 24259 [gene_biotype:snRNA transcript_biotype:snRNA]                                                 |
| -2.36 | Gm23886       | predicted gene, 23886                                                                                               |
| -2.36 | Gm25654       | predicted gene, 25654 [gene_biotype:snRNA transcript_biotype:snRNA]                                                 |
| -2.36 | Hoxb6         | Mus musculus homeobox B6 (Hoxb6), mRNA.                                                                             |
| -2.36 | Gm23523       | predicted gene, 23523 [gene_biotype:snRNA transcript_biotype:snRNA]                                                 |
| -2.37 | Gm12950       | predicted gene 12950 [gene_biotype:processed_pseudogene transcript_biotype:processed_pseudogene]                    |
| -2.37 | Gm9308        | predicted gene 9308 [gene_biotype:processed_pseudogene transcript_biotype:processed_pseudogene]                     |
| -2.37 | ---           | Mus musculus non-coding RNA, oocyte clustered small RNA11980, complete sequence.                                    |
| -2.37 | Gm26070       | predicted gene, 26070 [gene_biotype:snoRNA transcript_biotype:snoRNA]                                               |
| -2.37 | ---           | Non-coding transcript identified by NONCODE: Sense No Exonic                                                        |
| -2.37 | Gm25633       | predicted gene, 25633 [gene_biotype:snRNA transcript_biotype:snRNA]                                                 |
| -2.37 | ---           | Non-coding transcript identified by NONCODE: Linc                                                                   |



|       |            |                                                                                                                                            |
|-------|------------|--------------------------------------------------------------------------------------------------------------------------------------------|
| -2.44 | ---        | Non-coding transcript identified by NONCODE: Linc                                                                                          |
| -2.44 | ---        | Non-coding transcript identified by NONCODE: Linc                                                                                          |
| -2.44 | Gm24535    | predicted gene, 24535 [gene_biotype:snRNA transcript_biotype:snRNA]                                                                        |
| -2.45 | Gm22932    | predicted gene, 22932 [gene_biotype:miRNA transcript_biotype:miRNA]                                                                        |
| -2.45 | Hist1h2bn  | Mus musculus histone cluster 1, H2bn (Hist1h2bn), mRNA.                                                                                    |
| -2.45 | Mir23a     | Mus musculus microRNA 23a (Mir23a), microRNA.                                                                                              |
| -2.45 | Gm8775     | predicted gene 8775 [gene_biotype:processed_pseudogene transcript_biotype:processed_pseudogene]                                            |
| -2.45 | ---        | Non-coding transcript identified by NONCODE: Sense No Exonic                                                                               |
| -2.45 | Gm19974    | PREDICTED: predicted gene, 19974 (Gm19974), miscRNA.                                                                                       |
| -2.45 | Gm15377    | predicted gene 15377 [gene_biotype:processed_pseudogene transcript_biotype:processed_pseudogene]                                           |
| -2.45 | Mir1946b   | Mus musculus microRNA 1946b (Mir1946b), microRNA.                                                                                          |
| -2.45 | Hist1h2bl  | Mus musculus histone cluster 1, H2bl (Hist1h2bl), mRNA.                                                                                    |
| -2.46 | Gm10272    | Mus musculus predicted gene 10272 (Gm10272), non-coding RNA.                                                                               |
| -2.46 | Gm14095    | predicted gene 14095 [gene_biotype:lincRNA transcript_biotype:lincRNA]                                                                     |
| -2.46 | Olf1367    | Mus musculus olfactory receptor 1367 (Olf1367), mRNA.                                                                                      |
| -2.46 | Gm25792    | predicted gene, 25792 [gene_biotype:snRNA transcript_biotype:snRNA]                                                                        |
| -2.46 | Gm5947     | predicted pseudogene 5947                                                                                                                  |
| -2.46 | Eif5a13-ps | eukaryotic translation initiation factor 5A-like 3, pseudogene [gene_biotype:processed_pseudogene transcript_biotype:processed_pseudogene] |
| -2.47 | Gm12131    | predicted gene 12131 [gene_biotype:processed_pseudogene transcript_biotype:processed_pseudogene]                                           |
| -2.47 | Gm26178    | predicted gene, 26178 [gene_biotype:snRNA transcript_biotype:snRNA]                                                                        |
| -2.47 | Gm11893    | predicted gene 11893 [gene_biotype:processed_pseudogene transcript_biotype:processed_pseudogene]                                           |
| -2.47 | Amy2-ps1   | amylase 2, pseudogene 1 [gene_biotype:unprocessed_pseudogene transcript_biotype:unprocessed_pseudogene]                                    |
| -2.47 | ---        | Non-coding transcript identified by NONCODE: Sense No Exonic                                                                               |
| -2.47 | ---        | Non-coding transcript identified by NONCODE: Sense No Exonic                                                                               |
| -2.47 | Dis3       | Mus musculus DIS3 mitotic control homolog (S. cerevisiae) (Dis3), mRNA.                                                                    |
| -2.47 | Gm22043    | predicted gene, 22043 [gene_biotype:snRNA transcript_biotype:snRNA]                                                                        |
| -2.47 | Gm25106    | predicted gene, 25106 [gene_biotype:snRNA transcript_biotype:snRNA]                                                                        |
| -2.48 | ---        | Non-coding transcript identified by NONCODE: Sense No Exonic                                                                               |
| -2.48 | ---        | Non-coding transcript identified by NONCODE: Sense No Exonic                                                                               |
| -2.48 | ---        | Non-coding transcript identified by NONCODE: Linc                                                                                          |
| -2.48 | Gm10134    | predicted gene 10134 [gene_biotype:protein_coding transcript_biotype:protein_coding]                                                       |
| -2.49 | Gm37832    | predicted gene, 37832 [gene_biotype:processed_pseudogene transcript_biotype:processed_pseudogene]                                          |
| -2.49 | Gm22044    | predicted gene, 22044 [gene_biotype:snRNA transcript_biotype:snRNA]                                                                        |
| -2.49 | Gm22444    | predicted gene, 22444 [gene_biotype:snRNA transcript_biotype:snRNA]                                                                        |
| -2.49 | Gm25793    | predicted gene, 25793 [gene_biotype:snRNA transcript_biotype:snRNA]                                                                        |
| -2.50 | Gm24267    | predicted gene, 24267 [gene_biotype:snRNA transcript_biotype:snRNA]                                                                        |
| -2.50 | Olf837     | Mus musculus olfactory receptor 837 (Olf837), mRNA.                                                                                        |
| -2.50 | Mir6924    | Mus musculus microRNA 6924 (Mir6924), microRNA.                                                                                            |
| -2.50 | ---        | Non-coding transcript identified by Luo, et al.                                                                                            |
| -2.50 | Gm15798    | predicted gene 15798                                                                                                                       |
| -2.51 | Gm13065    | predicted gene 13065 [gene_biotype:processed_pseudogene transcript_biotype:processed_pseudogene]                                           |
| -2.51 | Gm25581    | predicted gene, 25581 [gene_biotype:snRNA transcript_biotype:snRNA]                                                                        |
| -2.51 | ---        | Non-coding transcript identified by NONCODE: Sense No Exonic                                                                               |
| -2.51 | Gm23453    | predicted gene, 23453 [gene_biotype:snRNA transcript_biotype:snRNA]                                                                        |
| -2.52 | Gm23583    | predicted gene, 23583                                                                                                                      |
| -2.52 | Gm24405    | predicted gene, 24405 [gene_biotype:snRNA transcript_biotype:snRNA]                                                                        |
| -2.52 | ---        | Non-coding transcript identified by NONCODE: Sense No Exonic                                                                               |
| -2.52 | Gm24707    | predicted gene, 24707 [gene_biotype:snRNA transcript_biotype:snRNA]                                                                        |
| -2.52 | Zfp729b    | Mus musculus zinc finger protein 729b (Zfp729b), mRNA.                                                                                     |
| -2.52 | Mir7061    | Mus musculus microRNA 7061 (Mir7061), microRNA.                                                                                            |
| -2.52 | Gm25040    | predicted gene, 25040 [gene_biotype:miRNA transcript_biotype:miRNA]                                                                        |
| -2.53 | Gm14894    | predicted gene 14894 [gene_biotype:processed_pseudogene transcript_biotype:processed_pseudogene]                                           |
| -2.53 | ---        | Non-coding transcript identified by NONCODE: Sense No Exonic                                                                               |
| -2.53 | Gm24765    | predicted gene, 24765 [gene_biotype:snRNA transcript_biotype:snRNA]                                                                        |
| -2.53 | Mir290b    | Mus musculus microRNA 290b (Mir290b), microRNA.                                                                                            |
| -2.53 | Olf654     | Mus musculus olfactory receptor 654 (Olf654), mRNA.                                                                                        |
| -2.54 | Gp2        | Mus musculus glycoprotein 2 (zymogen granule membrane) (Gp2), mRNA.                                                                        |
| -2.54 | Gm24412    | predicted gene, 24412 [gene_biotype:snoRNA transcript_biotype:snoRNA]                                                                      |
| -2.54 | ---        | Mus musculus non-coding RNA, oocyte_clustered_small_RNA2458, complete sequence.                                                            |
| -2.54 | ---        | Mus musculus piRNA piR-6869, complete sequence.                                                                                            |
| -2.54 | Gm23926    | predicted gene, 23926 [gene_biotype:snRNA transcript_biotype:snRNA]                                                                        |
| -2.54 | ---        | Non-coding transcript identified by NONCODE: Sense No Exonic                                                                               |
| -2.55 | Mir376a    | Mus musculus microRNA 376a (Mir376a), microRNA.                                                                                            |
| -2.55 | Gm23672    | predicted gene, 23672 [gene_biotype:snRNA transcript_biotype:snRNA]                                                                        |
| -2.55 | Gm26485    | predicted gene, 26485 [gene_biotype:snRNA transcript_biotype:snRNA]                                                                        |
| -2.55 | Gm24690    | predicted gene, 24690 [gene_biotype:rRNA transcript_biotype:rRNA]                                                                          |
| -2.55 | Gm22094    | predicted gene, 22094 [gene_biotype:rRNA transcript_biotype:rRNA]                                                                          |
| -2.55 | Gm11954    | predicted gene 11954 [gene_biotype:processed_pseudogene transcript_biotype:processed_pseudogene]                                           |
| -2.55 | ---        | Non-coding transcript identified by NONCODE: Sense No Exonic                                                                               |
| -2.55 | Mir6994    | Mus musculus microRNA 6994 (Mir6994), microRNA.                                                                                            |
| -2.55 | Gm23690    | predicted gene, 23690 [gene_biotype:snRNA transcript_biotype:snRNA]                                                                        |
| -2.56 | Olf1353    | Mus musculus olfactory receptor 1353 (Olf1353), mRNA.                                                                                      |
| -2.56 | Gm25140    | predicted gene, 25140 [gene_biotype:snRNA transcript_biotype:snRNA]                                                                        |
| -2.56 | Gm25670    | predicted gene, 25670 [gene_biotype:snRNA transcript_biotype:snRNA]                                                                        |
| -2.56 | ---        | Mus musculus piRNA piR-101521, complete sequence.                                                                                          |
| -2.57 | Gm23796    | predicted gene, 23796 [gene_biotype:snRNA transcript_biotype:snRNA]                                                                        |
| -2.57 | Gm6397     | predicted gene 6397 [gene_biotype:processed_pseudogene transcript_biotype:processed_pseudogene]                                            |

|       |               |                                                                                                                     |
|-------|---------------|---------------------------------------------------------------------------------------------------------------------|
| -2.57 | Gm23540       | predicted gene, 23540 [gene_biotype:snRNA transcript_biotype:snRNA]                                                 |
| -2.57 | Gm8332        | predicted pseudogene 8332                                                                                           |
| -2.57 | Pla2g1b       | Mus musculus phospholipase A2, group IB, pancreas (Pla2g1b), mRNA.                                                  |
| -2.57 | Mir1191b      | Mus musculus microRNA 1191b (Mir1191b), microRNA.                                                                   |
| -2.58 | Gm23095       | predicted gene, 23095 [gene_biotype:snRNA transcript_biotype:snRNA]                                                 |
| -2.58 | Mir6362       | microRNA 6362 [gene_biotype:miRNA transcript_biotype:miRNA]                                                         |
| -2.58 | ---           | The use of siRNA silencing in the prevention of metastasis.                                                         |
| -2.58 | Gm14068       | predicted gene 14068                                                                                                |
| -2.58 | ---           | Non-coding transcript identified by NONCODE: Linc                                                                   |
| -2.58 | Gm24912       | predicted gene, 24912 [gene_biotype:snoRNA transcript_biotype:snoRNA]                                               |
| -2.58 | Gm23239       | predicted gene, 23239 [gene_biotype:snRNA transcript_biotype:snRNA]                                                 |
| -2.58 | ---           | Mus musculus non-coding RNA, oocyte clustered small RNA7167, complete sequence.                                     |
| -2.59 | Olfir407-ps1  | olfactory receptor 407, pseudogene 1[gene_biotype:unprocessed_pseudogene transcript_biotype:unprocessed_pseudogene] |
| -2.59 | Mir6975       | Mus musculus microRNA 6975 (Mir6975), microRNA.                                                                     |
| -2.59 | Gm24959       | predicted gene, 24959 [gene_biotype:snRNA transcript_biotype:snRNA]                                                 |
| -2.59 | ---           | Non-coding transcript identified by NONCODE: Sense No Exonic                                                        |
| -2.59 | Gm24998       | predicted gene, 24998 [gene_biotype:snoRNA transcript_biotype:snoRNA]                                               |
| -2.59 | Gm14445       | predicted gene 14445 [gene_biotype:unprocessed_pseudogene transcript_biotype:unprocessed_pseudogene]                |
| -2.59 | Gm15311       | predicted gene 15311 [gene_biotype:unprocessed_pseudogene transcript_biotype:unprocessed_pseudogene]                |
| -2.60 | ---           | Non-coding transcript identified by NONCODE: Sense No Exonic                                                        |
| -2.60 | ---           | Non-coding transcript identified by Luo, et al.                                                                     |
| -2.60 | Gm16373       | predicted pseudogene 16373 [gene_biotype:processed_pseudogene transcript_biotype:processed_pseudogene]              |
| -2.60 | Gm11204       | predicted gene 11204 [gene_biotype:processed_pseudogene transcript_biotype:processed_pseudogene]                    |
| -2.60 | Gm24292       | predicted gene, 24292 [gene_biotype:snRNA transcript_biotype:snRNA]                                                 |
| -2.60 | Mir6373       | Mus musculus microRNA 6373 (Mir6373), microRNA.                                                                     |
| -2.60 | Gm23969       | predicted gene, 23969 [gene_biotype:snoRNA transcript_biotype:snoRNA]                                               |
| -2.60 | Gm23966       | predicted gene, 23966 [gene_biotype:snRNA transcript_biotype:snRNA]                                                 |
| -2.60 | Gm22638       | predicted gene, 22638 [gene_biotype:snRNA transcript_biotype:snRNA]                                                 |
| -2.61 | ---           | Non-coding transcript identified by NONCODE: Sense No Exonic                                                        |
| -2.61 | ---           | Non-coding transcript identified by NONCODE: Sense No Exonic                                                        |
| -2.61 | Gm23448       | predicted gene, 23448 [gene_biotype:snRNA transcript_biotype:snRNA]                                                 |
| -2.61 | Gm24077       | predicted gene, 24077 [gene_biotype:snoRNA transcript_biotype:snoRNA]                                               |
| -2.61 | Gm24868       | predicted gene, 24868 [gene_biotype:snoRNA transcript_biotype:snoRNA]                                               |
| -2.61 | Klk1b5        | Mus musculus kallikrein 1-related peptidase b5 (Klk1b5), mRNA.                                                      |
| -2.61 | Gm24036       | predicted gene, 24036 [gene_biotype:snRNA transcript_biotype:snRNA]                                                 |
| -2.62 | Gm5858        | PREDICTED: predicted gene 5858, transcript variant 1 (Gm5858), mRNA.                                                |
| -2.62 | Gm22618       | predicted gene, 22618 [gene_biotype:snRNA transcript_biotype:snRNA]                                                 |
| -2.62 | Mir6388       | Mus musculus microRNA 6388 (Mir6388), microRNA.                                                                     |
| -2.62 | Gm23463       | predicted gene, 23463 [gene_biotype:snRNA transcript_biotype:snRNA]                                                 |
| -2.62 | Gm7426        | predicted gene 7426 [gene_biotype:pseudogene transcript_biotype:pseudogene]                                         |
| -2.62 | Gm23515       | predicted gene, 23515 [gene_biotype:snRNA transcript_biotype:snRNA]                                                 |
| -2.62 | ---           | Non-coding transcript identified by NONCODE: Linc                                                                   |
| -2.63 | Gm22633       | predicted gene, 22633 [gene_biotype:snRNA transcript_biotype:snRNA]                                                 |
| -2.63 | Gm15027       | predicted gene 15027 [gene_biotype:unprocessed_pseudogene transcript_biotype:unprocessed_pseudogene]                |
| -2.63 | Gm14536       | predicted gene 14536 [gene_biotype:unprocessed_pseudogene transcript_biotype:unprocessed_pseudogene]                |
| -2.63 | ---           | Non-coding transcript identified by NONCODE: Linc                                                                   |
| -2.63 | ---           | Non-coding transcript identified by NONCODE: Linc                                                                   |
| -2.64 | Mir7041       | Mus musculus microRNA 7041 (Mir7041), microRNA.                                                                     |
| -2.64 | ---           | Non-coding transcript identified by NONCODE: Sense No Exonic                                                        |
| -2.64 | Gm26465       | predicted gene, 26465 [gene_biotype:snRNA transcript_biotype:snRNA]                                                 |
| -2.64 | Gm25021       | predicted gene, 25021 [gene_biotype:snRNA transcript_biotype:snRNA]                                                 |
| -2.64 | Gm24864       | predicted gene, 24864                                                                                               |
| -2.64 | Gm24424       | predicted gene, 24424 [gene_biotype:snRNA transcript_biotype:snRNA]                                                 |
| -2.64 | Gm24389       | predicted gene, 24389 [gene_biotype:snRNA transcript_biotype:snRNA]                                                 |
| -2.64 | Gm14200       | predicted gene 14200 [gene_biotype:processed_pseudogene transcript_biotype:processed_pseudogene]                    |
| -2.64 | Mir6381       | Mus musculus microRNA 6381 (Mir6381), microRNA.                                                                     |
| -2.65 | ---           | Non-coding transcript identified by NONCODE: Linc                                                                   |
| -2.65 | Gm22307       | predicted gene, 22307 [gene_biotype:snRNA transcript_biotype:snRNA]                                                 |
| -2.65 | Gm25522       | predicted gene, 25522 [gene_biotype:snRNA transcript_biotype:snRNA]                                                 |
| -2.66 | ---           | Non-coding transcript identified by NONCODE: Sense No Exonic                                                        |
| -2.66 | ---           | Non-coding transcript identified by NONCODE: Sense No Exonic                                                        |
| -2.66 | Gm26316       | predicted gene, 26316 [gene_biotype:snRNA transcript_biotype:snRNA]                                                 |
| -2.67 | 9330161L09Rik | RIKEN cDNA 9330161L09 gene [gene_biotype:protein_coding transcript_biotype:protein_coding]                          |
| -2.67 | ---           | Non-coding transcript identified by NONCODE: Sense No Exonic                                                        |
| -2.67 | Mir194-1      | Mus musculus microRNA 194-1 (Mir194-1), microRNA.                                                                   |
| -2.67 | Gm14922       | predicted gene 14922 [gene_biotype:processed_pseudogene transcript_biotype:processed_pseudogene]                    |
| -2.67 | Gm16378       | predicted gene 16378 [gene_biotype:processed_pseudogene transcript_biotype:processed_pseudogene]                    |
| -2.67 | Gm17149       | predicted gene 17149 [gene_biotype:processed_pseudogene transcript_biotype:processed_pseudogene]                    |
| -2.67 | Gm6984        | predicted gene 6984                                                                                                 |
| -2.67 | Scarna13      | Mus musculus small Cajal body-specific RNA 1 (Scarna13), guide RNA.                                                 |
| -2.67 | ---           | Non-coding transcript identified by NONCODE: Sense No Exonic                                                        |
| -2.68 | Gm22042       | predicted gene, 22042 [gene_biotype:snRNA transcript_biotype:snRNA]                                                 |
| -2.68 | Gm3076        | predicted gene 3076 [gene_biotype:processed_pseudogene transcript_biotype:processed_pseudogene]                     |
| -2.68 | ---           | Mus musculus non-coding RNA, oocyte clustered small RNA2003, complete sequence.                                     |
| -2.68 | Gm20782       | predicted gene, 20782 [gene_biotype:protein_coding transcript_biotype:protein_coding]                               |
| -2.69 | Gm22969       | predicted gene, 22969 [gene_biotype:snRNA transcript_biotype:snRNA]                                                 |
| -2.69 | Gm27160       | predicted gene 27160 [gene_biotype:processed_pseudogene transcript_biotype:processed_pseudogene]                    |

|       |           |                                                                                                                                              |
|-------|-----------|----------------------------------------------------------------------------------------------------------------------------------------------|
| -2.69 | Spin2-ps3 | spindlin family, member 2, pseudogene 3                                                                                                      |
| -2.69 | Spin2-ps4 | spindlin family, member 2, pseudogene 4                                                                                                      |
| -2.69 | Gm22717   | predicted gene, 22717 [gene_biotype:snRNA transcript_biotype:snRNA]                                                                          |
| -2.69 | ---       | Non-coding transcript identified by NONCODE: Linc                                                                                            |
| -2.69 | Gm25652   | predicted gene, 25652 [gene_biotype:snRNA transcript_biotype:snRNA]                                                                          |
| -2.69 | Gm23137   | predicted gene, 23137 [gene_biotype:snRNA transcript_biotype:snRNA]                                                                          |
| -2.70 | Gm23730   | predicted gene, 23730 [gene_biotype:snRNA transcript_biotype:snRNA]                                                                          |
| -2.70 | Gm15162   | predicted gene 15162 [gene_biotype:processed_pseudogene transcript_biotype:processed_pseudogene]                                             |
| -2.70 | Mir143    | Mus musculus microRNA 143 (Mir143), microRNA.                                                                                                |
| -2.70 | ---       | Mus musculus non-coding RNA, oocyte_clustered_small_RNA5052, complete sequence.                                                              |
| -2.70 | ---       | Mus musculus non-coding RNA, oocyte_clustered_small_RNA5052, complete sequence.                                                              |
| -2.70 | ---       | Mus musculus non-coding RNA, oocyte_clustered_small_RNA5052, complete sequence.                                                              |
| -2.70 | ---       | Mus musculus non-coding RNA, oocyte_clustered_small_RNA5052, complete sequence.                                                              |
| -2.70 | ---       | Mus musculus non-coding RNA, oocyte_clustered_small_RNA5052, complete sequence.                                                              |
| -2.70 | Mir466d   | microRNA 466d [gene_biotype:miRNA transcript_biotype:miRNA]                                                                                  |
| -2.70 | ---       | Non-coding transcript identified by NONCODE: Sense No Exonic                                                                                 |
| -2.70 | Gm23269   | predicted gene, 23269 [gene_biotype:snRNA transcript_biotype:snRNA]                                                                          |
| -2.71 | Mir6983   | Mus musculus microRNA 6983 (Mir6983), microRNA.                                                                                              |
| -2.71 | ---       | Non-coding transcript identified by NONCODE: Antisense                                                                                       |
| -2.71 | Gm25245   | predicted gene, 25245 [gene_biotype:snRNA transcript_biotype:snRNA]                                                                          |
| -2.71 | ---       | Non-coding transcript identified by NONCODE: Sense No Exonic                                                                                 |
| -2.72 | ---       | Non-coding transcript identified by NONCODE: Sense No Exonic                                                                                 |
| -2.72 | ---       | Non-coding transcript identified by Luo, et al.                                                                                              |
| -2.72 | Gm14253   | predicted gene 14253                                                                                                                         |
| -2.72 | Gm12112   | predicted gene 12112 [gene_biotype:processed_pseudogene transcript_biotype:processed_pseudogene]                                             |
| -2.73 | Rbm4      | Mus musculus RNA binding motif protein 4 (Rbm4), transcript variant 3, mRNA.                                                                 |
| -2.73 | Gm23733   | predicted gene, 23733 [gene_biotype:snRNA transcript_biotype:snRNA]                                                                          |
| -2.73 | ---       | Non-coding transcript identified by NONCODE: Linc                                                                                            |
| -2.74 | Gm24415   | predicted gene, 24415 [gene_biotype:snRNA transcript_biotype:snRNA]                                                                          |
| -2.74 | Gm24336   | predicted gene, 24336 [gene_biotype:snoRNA transcript_biotype:snoRNA]                                                                        |
| -2.74 | ---       | Mus musculus piRNA piR-23129, complete sequence.                                                                                             |
| -2.74 | Gm22260   | predicted gene, 22260 [gene_biotype:snRNA transcript_biotype:snRNA]                                                                          |
| -2.74 | Gm25781   | predicted gene, 25781 [gene_biotype:snRNA transcript_biotype:snRNA]                                                                          |
| -2.74 | Gm26412   | predicted gene, 26412 [gene_biotype:snRNA transcript_biotype:snRNA]                                                                          |
| -2.75 | Gm25071   | predicted gene, 25071 [gene_biotype:miRNA transcript_biotype:miRNA]                                                                          |
| -2.75 | ---       | Mus musculus piRNA piR-109460, complete sequence.                                                                                            |
| -2.75 | Gm20656   | predicted gene 20656 [gene_biotype:unprocessed_pseudogene transcript_biotype:unprocessed_pseudogene]                                         |
| -2.75 | Gm22997   | predicted gene, 22997 [gene_biotype:snRNA transcript_biotype:snRNA]                                                                          |
| -2.75 | Rnu6      | Mus musculus U6 small nuclear RNA (Rnu6), small nuclear RNA.                                                                                 |
| -2.75 | Ap3s1-ps2 | adaptor-related protein complex 3, sigma 1 subunit, pseudogene 2 [gene_biotype:processed_pseudogene transcript_biotype:processed_pseudogene] |
| -2.76 | Gm22740   | predicted gene, 22740 [gene_biotype:snRNA transcript_biotype:snRNA]                                                                          |
| -2.76 | ---       | Non-coding transcript identified by NONCODE: Sense No Exonic                                                                                 |
| -2.77 | Gm15223   | predicted gene 15223 [gene_biotype:processed_pseudogene transcript_biotype:processed_pseudogene]                                             |
| -2.77 | ---       | Mus musculus non-coding RNA, oocyte_clustered_small_RNA2580, complete sequence.                                                              |
| -2.77 | Gm24123   | predicted gene, 24123 [gene_biotype:snoRNA transcript_biotype:snoRNA]                                                                        |
| -2.77 | Mir669m-2 | microRNA 669m-2 [gene_biotype:miRNA transcript_biotype:miRNA]                                                                                |
| -2.77 | Gm23511   | predicted gene, 23511 [gene_biotype:snRNA transcript_biotype:snRNA]                                                                          |
| -2.77 | ---       | Non-coding transcript identified by NONCODE: Sense No Exonic                                                                                 |
| -2.78 | Gm23921   | predicted gene, 23921                                                                                                                        |
| -2.78 | AF357399  | Mus musculus snoRNA AF357399 (AF357399), small nucleolar RNA.                                                                                |
| -2.78 | Rbm4      | Mus musculus RNA binding motif protein 4 (Rbm4), transcript variant 2, mRNA.                                                                 |
| -2.79 | Vmn1r201  | Mus musculus vomeronasal 1 receptor 201 (Vmn1r201), mRNA.                                                                                    |
| -2.79 | Gm24481   | predicted gene, 24481 [gene_biotype:snRNA transcript_biotype:snRNA]                                                                          |
| -2.79 | Rnu5g     | RNA, U5G small nuclear                                                                                                                       |
| -2.79 | Rnu5g     | Mus musculus RNA, U5G small nuclear (Rnu5g), small nuclear RNA.                                                                              |
| -2.80 | Gm22505   | predicted gene, 22505 [gene_biotype:snRNA transcript_biotype:snRNA]                                                                          |
| -2.80 | Gm22363   | predicted gene, 22363 [gene_biotype:snRNA transcript_biotype:snRNA]                                                                          |
| -2.80 | ---       | Non-coding transcript identified by NONCODE: Sense No Exonic                                                                                 |
| -2.80 | Gm25207   | predicted gene, 25207 [gene_biotype:snRNA transcript_biotype:snRNA]                                                                          |
| -2.80 | Gm10554   | PREDICTED: predicted gene 10554 (Gm10554), miscRNA.                                                                                          |
| -2.80 | Gm26110   | predicted gene, 26110 [gene_biotype:snRNA transcript_biotype:snRNA]                                                                          |
| -2.80 | Gm24018   | predicted gene, 24018 [gene_biotype:snRNA transcript_biotype:snRNA]                                                                          |
| -2.81 | Gm23003   | predicted gene, 23003 [gene_biotype:snRNA transcript_biotype:snRNA]                                                                          |
| -2.81 | Gm25457   | predicted gene, 25457 [gene_biotype:snRNA transcript_biotype:snRNA]                                                                          |
| -2.82 | Gm27191   | predicted gene 27191 [gene_biotype:lincRNA transcript_biotype:lincRNA]                                                                       |
| -2.82 | ---       | Non-coding transcript identified by NONCODE: Linc                                                                                            |
| -2.82 | Gm23459   | predicted gene, 23459 [gene_biotype:snRNA transcript_biotype:snRNA]                                                                          |
| -2.83 | Gm15267   | predicted gene 15267 [gene_biotype:processed_pseudogene transcript_biotype:processed_pseudogene]                                             |
| -2.83 | Taar7f    | Mus musculus trace amine-associated receptor 7F (Taar7f), mRNA.                                                                              |
| -2.83 | Gm24173   | predicted gene, 24173 [gene_biotype:snoRNA transcript_biotype:snoRNA]                                                                        |
| -2.83 | Gm25136   | predicted gene, 25136 [gene_biotype:snoRNA transcript_biotype:snoRNA]                                                                        |
| -2.83 | Gm22299   | predicted gene, 22299 [gene_biotype:snoRNA transcript_biotype:snoRNA]                                                                        |
| -2.84 | Gm6161    | predicted gene 6161 [gene_biotype:processed_pseudogene transcript_biotype:processed_pseudogene]                                              |
| -2.85 | ---       | Non-coding transcript identified by NONCODE: Linc                                                                                            |
| -2.85 | Gm24596   | predicted gene, 24596 [gene_biotype:snRNA transcript_biotype:snRNA]                                                                          |
| -2.85 | Gm22974   | predicted gene, 22974 [gene_biotype:snRNA transcript_biotype:snRNA]                                                                          |

|       |           |                                                                                                     |
|-------|-----------|-----------------------------------------------------------------------------------------------------|
| -2.86 | Gm20701   | predicted gene 20701 [gene_biotype:processed_pseudogene transcript_biotype:processed_pseudogene]    |
| -2.87 | Gm11456   | predicted gene 11456 [gene_biotype:processed_pseudogene transcript_biotype:processed_pseudogene]    |
| -2.87 | Gm26585   | predicted gene, 26585 [gene_biotype:processed_pseudogene transcript_biotype:processed_pseudogene]   |
| -2.87 | Gm22126   | predicted gene, 22126 [gene_biotype:snRNA transcript_biotype:snRNA]                                 |
| -2.88 | Gm22866   | predicted gene, 22866 [gene_biotype:snRNA transcript_biotype:snRNA]                                 |
| -2.88 | Gm23430   | predicted gene, 23430                                                                               |
| -2.88 | Gm24918   | predicted gene, 24918 [gene_biotype:snoRNA transcript_biotype:snoRNA]                               |
| -2.89 | Rps18-ps3 | ribosomal protein S18, pseudogene 3 [gene_biotype:protein_coding transcript_biotype:protein_coding] |
| -2.89 | ---       | Non-coding transcript identified by NONCODE: Sense No Exonic                                        |
| -2.89 | Gm17622   | predicted gene, 17622 [gene_biotype:protein_coding transcript_biotype:protein_coding]               |
| -2.89 | Defb34    | Mus musculus defensin beta 34 (Defb34), mRNA.                                                       |
| -2.90 | Gm8623    | predicted gene 8623 [gene_biotype:processed_pseudogene transcript_biotype:processed_pseudogene]     |
| -2.90 | ---       | Non-coding transcript identified by NONCODE: Sense No Exonic                                        |
| -2.90 | ---       | Mus musculus piRNA piR-5723, complete sequence.                                                     |
| -2.90 | ---       | Non-coding transcript identified by NONCODE: Sense No Exonic                                        |
| -2.91 | Gm23934   | predicted gene, 23934 [gene_biotype:snRNA transcript_biotype:snRNA]                                 |
| -2.91 | Gm24182   | predicted gene, 24182 [gene_biotype:snRNA transcript_biotype:snRNA]                                 |
| -2.91 | Gm25829   | predicted gene, 25829 [gene_biotype:snRNA transcript_biotype:snRNA]                                 |
| -2.91 | Gm22360   | predicted gene, 22360 [gene_biotype:snRNA transcript_biotype:snRNA]                                 |
| -2.91 | Gm25583   | predicted gene, 25583 [gene_biotype:snRNA transcript_biotype:snRNA]                                 |
| -2.91 | Gm26496   | predicted gene, 26496 [gene_biotype:snRNA transcript_biotype:snRNA]                                 |
| -2.91 | Gm22295   | predicted gene, 22295 [gene_biotype:snRNA transcript_biotype:snRNA]                                 |
| -2.91 | Gm25869   | predicted gene, 25869 [gene_biotype:snRNA transcript_biotype:snRNA]                                 |
| -2.91 | Gm22682   | predicted gene, 22682 [gene_biotype:snRNA transcript_biotype:snRNA]                                 |
| -2.91 | Gm25127   | predicted gene, 25127 [gene_biotype:snRNA transcript_biotype:snRNA]                                 |
| -2.91 | Gm24458   | predicted gene, 24458 [gene_biotype:snRNA transcript_biotype:snRNA]                                 |
| -2.91 | Gm22798   | predicted gene, 22798 [gene_biotype:snRNA transcript_biotype:snRNA]                                 |
| -2.91 | Gm24260   | predicted gene, 24260 [gene_biotype:snRNA transcript_biotype:snRNA]                                 |
| -2.91 | Gm24978   | predicted gene, 24978 [gene_biotype:snRNA transcript_biotype:snRNA]                                 |
| -2.91 | Gm24967   | predicted gene, 24967 [gene_biotype:snRNA transcript_biotype:snRNA]                                 |
| -2.91 | Gm22092   | predicted gene, 22092 [gene_biotype:snRNA transcript_biotype:snRNA]                                 |
| -2.91 | Gm25737   | predicted gene, 25737 [gene_biotype:snRNA transcript_biotype:snRNA]                                 |
| -2.91 | Gm26058   | predicted gene, 26058 [gene_biotype:snRNA transcript_biotype:snRNA]                                 |
| -2.91 | Gm25405   | predicted gene, 25405 [gene_biotype:snRNA transcript_biotype:snRNA]                                 |
| -2.91 | Gm24414   | predicted gene, 24414 [gene_biotype:snRNA transcript_biotype:snRNA]                                 |
| -2.91 | Gm25790   | predicted gene, 25790 [gene_biotype:snRNA transcript_biotype:snRNA]                                 |
| -2.91 | Gm22822   | predicted gene, 22822 [gene_biotype:snRNA transcript_biotype:snRNA]                                 |
| -2.91 | Gm24693   | predicted gene, 24693 [gene_biotype:snRNA transcript_biotype:snRNA]                                 |
| -2.91 | Gm26427   | predicted gene, 26427 [gene_biotype:snRNA transcript_biotype:snRNA]                                 |
| -2.91 | Gm24205   | predicted gene, 24205 [gene_biotype:snRNA transcript_biotype:snRNA]                                 |
| -2.91 | Gm25064   | predicted gene, 25064 [gene_biotype:snRNA transcript_biotype:snRNA]                                 |
| -2.91 | Gm22288   | predicted gene, 22288 [gene_biotype:snRNA transcript_biotype:snRNA]                                 |
| -2.91 | Gm22580   | predicted gene, 22580 [gene_biotype:snRNA transcript_biotype:snRNA]                                 |
| -2.91 | Gm26317   | predicted gene, 26317 [gene_biotype:snRNA transcript_biotype:snRNA]                                 |
| -2.91 | Gm25256   | predicted gene, 25256 [gene_biotype:snRNA transcript_biotype:snRNA]                                 |
| -2.91 | Gm24486   | predicted gene, 24486 [gene_biotype:snRNA transcript_biotype:snRNA]                                 |
| -2.91 | Gm24019   | predicted gene, 24019 [gene_biotype:snRNA transcript_biotype:snRNA]                                 |
| -2.91 | Gm26243   | predicted gene, 26243 [gene_biotype:snRNA transcript_biotype:snRNA]                                 |
| -2.91 | Gm25709   | predicted gene, 25709 [gene_biotype:snRNA transcript_biotype:snRNA]                                 |
| -2.91 | Gm24803   | predicted gene, 24803 [gene_biotype:snRNA transcript_biotype:snRNA]                                 |
| -2.91 | Gm24859   | predicted gene, 24859 [gene_biotype:snRNA transcript_biotype:snRNA]                                 |
| -2.91 | Gm22246   | predicted gene, 22246 [gene_biotype:snRNA transcript_biotype:snRNA]                                 |
| -2.91 | Gm22170   | predicted gene, 22170 [gene_biotype:snRNA transcript_biotype:snRNA]                                 |
| -2.91 | Gm23296   | predicted gene, 23296 [gene_biotype:snRNA transcript_biotype:snRNA]                                 |
| -2.91 | Gm24873   | predicted gene, 24873 [gene_biotype:snRNA transcript_biotype:snRNA]                                 |
| -2.91 | Gm22823   | predicted gene, 22823 [gene_biotype:snRNA transcript_biotype:snRNA]                                 |
| -2.91 | Gm24540   | predicted gene, 24540 [gene_biotype:snRNA transcript_biotype:snRNA]                                 |
| -2.91 | Gm24753   | predicted gene, 24753 [gene_biotype:snRNA transcript_biotype:snRNA]                                 |
| -2.91 | Gm23217   | predicted gene, 23217 [gene_biotype:snRNA transcript_biotype:snRNA]                                 |
| -2.91 | Gm26295   | predicted gene, 26295 [gene_biotype:snRNA transcript_biotype:snRNA]                                 |
| -2.91 | Gm25547   | predicted gene, 25547 [gene_biotype:snRNA transcript_biotype:snRNA]                                 |
| -2.91 | Gm24722   | predicted gene, 24722 [gene_biotype:snRNA transcript_biotype:snRNA]                                 |
| -2.91 | Rnu6      | U6 small nuclear RNA                                                                                |
| -2.91 | Gm23512   | predicted gene, 23512 [gene_biotype:snRNA transcript_biotype:snRNA]                                 |
| -2.92 | Gm23461   | predicted gene, 23461 [gene_biotype:snRNA transcript_biotype:snRNA]                                 |
| -2.92 | Gm25387   | predicted gene, 25387 [gene_biotype:snoRNA transcript_biotype:snoRNA]                               |
| -2.93 | ---       | Mus musculus piRNA piR-114513, complete sequence.                                                   |
| -2.93 | ---       | Mus musculus piRNA piR-18537, complete sequence.                                                    |
| -2.93 | Gm26202   | predicted gene, 26202 [gene_biotype:snoRNA transcript_biotype:snoRNA]                               |
| -2.93 | ---       | Non-coding transcript identified by NONCODE: Sense No Exonic                                        |
| -2.93 | Gm23452   | predicted gene, 23452 [gene_biotype:snRNA transcript_biotype:snRNA]                                 |
| -2.94 | ---       | Mus musculus non-coding RNA, oocyte clustered small RNA8168, complete sequence.                     |
| -2.95 | Gm26071   | predicted gene, 26071 [gene_biotype:snRNA transcript_biotype:snRNA]                                 |
| -2.95 | uc_338    | TUC338                                                                                              |
| -2.96 | ---       | Non-coding transcript identified by NONCODE: Sense No Exonic                                        |
| -2.96 | Gm22566   | predicted gene, 22566 [gene_biotype:miRNA transcript_biotype:miRNA]                                 |
| -2.96 | Gm23143   | predicted gene, 23143 [gene_biotype:snRNA transcript_biotype:snRNA]                                 |



|       |              |                                                                                                                      |
|-------|--------------|----------------------------------------------------------------------------------------------------------------------|
| -2.96 | Gm22296      | predicted gene, 22296 [gene_biotype:snRNA transcript_biotype:snRNA]                                                  |
| -2.96 | Mir6915      | Mus musculus microRNA 6915 (Mir6915), microRNA.                                                                      |
| -2.98 | Gm20266      | PREDICTED: predicted gene, 20266, transcript variant 2 (Gm20266), miscRNA.                                           |
| -2.98 | Rpl29-ps1    | ribosomal protein L29 (Rpl29) pseudogene [gene_biotype:processed_pseudogene transcript_biotype:processed_pseudogene] |
| -2.98 | ---          | Non-coding transcript identified by NONCODE: Sense No Exonic                                                         |
| -2.99 | ---          | Non-coding transcript identified by NONCODE: Linc                                                                    |
| -2.99 | ---          | Non-coding transcript identified by NONCODE: Sense No Exonic                                                         |
| -2.99 | Gm15305      | predicted gene 15305 [gene_biotype:unprocessed_pseudogene transcript_biotype:unprocessed_pseudogene]                 |
| -2.99 | ---          | Non-coding transcript identified by NONCODE: Antisense                                                               |
| -3.00 | ---          | Non-coding transcript identified by NONCODE: Sense No Exonic                                                         |
| -3.01 | Gm23264      | predicted gene, 23264 [gene_biotype:snRNA transcript_biotype:snRNA]                                                  |
| -3.01 | Gm23531      | predicted gene, 23531 [gene_biotype:snoRNA transcript_biotype:snoRNA]                                                |
| -3.01 | Gm25682      | predicted gene, 25682 [gene_biotype:snRNA transcript_biotype:snRNA]                                                  |
| -3.02 | Gm22685      | predicted gene, 22685 [gene_biotype:snRNA transcript_biotype:snRNA]                                                  |
| -3.02 | ---          | Non-coding transcript identified by NONCODE: Sense No Exonic                                                         |
| -3.03 | Pcyl1b       | Mus musculus phosphate cytidyltransferase 1, choline, beta isoform (Pcyl1b), transcript variant 2, mRNA.             |
| -3.03 | BC085271     | Mus musculus cDNA sequence BC085271, mRNA (cDNA clone MGC:103372 IMAGE:30146389), complete cds.                      |
| -3.03 | Gm5943       | predicted pseudogene 5943 [gene_biotype:processed_pseudogene transcript_biotype:processed_pseudogene]                |
| -3.04 | Gm7099       | predicted gene 7099 [gene_biotype:pseudogene transcript_biotype:pseudogene]                                          |
| -3.04 | ---          | Non-coding transcript identified by NONCODE: Sense No Exonic                                                         |
| -3.04 | Olf1122      | Mus musculus olfactory receptor 1122 (Olf1122), mRNA.                                                                |
| -3.04 | ---          | Mus musculus piRNA piR-20707, complete sequence.                                                                     |
| -3.05 | Mir7015      | Mus musculus microRNA 7015 (Mir7015), microRNA.                                                                      |
| -3.06 | ---          | Non-coding transcript identified by NONCODE: Sense No Exonic                                                         |
| -3.06 | Gm25798      | predicted gene, 25798 [gene_biotype:snRNA transcript_biotype:snRNA]                                                  |
| -3.07 | ---          | Non-coding transcript identified by Luo, et al.                                                                      |
| -3.07 | Gm11653      | predicted gene 11653 [gene_biotype:processed_pseudogene transcript_biotype:processed_pseudogene]                     |
| -3.07 | Gm26002      | predicted gene, 26002 [gene_biotype:snRNA transcript_biotype:snRNA]                                                  |
| -3.07 | Gm9762       | predicted pseudogene 9762 [gene_biotype:processed_pseudogene transcript_biotype:processed_pseudogene]                |
| -3.07 | ---          | Mus musculus RNA for germline small RNA gsRNA367, complete sequence.                                                 |
| -3.08 | Gm28392      | predicted gene 28392 [gene_biotype:processed_pseudogene transcript_biotype:processed_pseudogene]                     |
| -3.08 | Gm24557      | predicted gene, 24557 [gene_biotype:miRNA transcript_biotype:miRNA]                                                  |
| -3.09 | Gm23472      | predicted gene, 23472 [gene_biotype:snRNA transcript_biotype:snRNA]                                                  |
| -3.09 | Gm23444      | predicted gene, 23444 [gene_biotype:snRNA transcript_biotype:snRNA]                                                  |
| -3.10 | LOC100862107 | PREDICTED: uncharacterized LOC100862107 (LOC100862107), miscRNA.                                                     |
| -3.10 | Prss1        | Mus musculus protease, serine 1 (trypsin 1) (Prss1), mRNA.                                                           |
| -3.11 | DLG2-AS1_1   | DLG2 antisense RNA 1 conserved region 1                                                                              |
| -3.11 | ---          | Non-coding transcript identified by NONCODE: Linc                                                                    |
| -3.11 | Gm22302      | predicted gene, 22302 [gene_biotype:snRNA transcript_biotype:snRNA]                                                  |
| -3.12 | ---          | Non-coding transcript identified by NONCODE: Sense No Exonic                                                         |
| -3.13 | ---          | Non-coding transcript identified by NONCODE: Sense No Exonic                                                         |
| -3.13 | Gm13511      | predicted gene 13511 [gene_biotype:processed_pseudogene transcript_biotype:processed_pseudogene]                     |
| -3.14 | Gm26187      | predicted gene, 26187 [gene_biotype:snRNA transcript_biotype:snRNA]                                                  |
| -3.14 | Gm25183      | predicted gene, 25183 [gene_biotype:snoRNA transcript_biotype:snoRNA]                                                |
| -3.15 | Vmn1r217     | Mus musculus vomeronasal 1 receptor 217 (Vmn1r217), mRNA.                                                            |
| -3.15 | Gm23763      | predicted gene, 23763 [gene_biotype:snRNA transcript_biotype:snRNA]                                                  |
| -3.16 | Mir872       | Mus musculus microRNA 872 (Mir872), microRNA.                                                                        |
| -3.16 | Gm25698      | predicted gene, 25698 [gene_biotype:snRNA transcript_biotype:snRNA]                                                  |
| -3.17 | Gm23849      | predicted gene, 23849 [gene_biotype:snRNA transcript_biotype:snRNA]                                                  |
| -3.17 | Gm23971      | predicted gene, 23971 [gene_biotype:snRNA transcript_biotype:snRNA]                                                  |
| -3.17 | Gm25411      | predicted gene, 25411 [gene_biotype:snRNA transcript_biotype:snRNA]                                                  |
| -3.17 | Gm24497      | predicted gene, 24497 [gene_biotype:snRNA transcript_biotype:snRNA]                                                  |
| -3.18 | Gm22351      | predicted gene, 22351 [gene_biotype:snRNA transcript_biotype:snRNA]                                                  |
| -3.20 | ---          | Non-coding transcript identified by NONCODE: Sense No Exonic                                                         |
| -3.21 | ---          | Mus musculus non-coding RNA, oocyte clustered small RNA4586, complete sequence.                                      |
| -3.21 | Gm13450      | predicted gene 13450 [gene_biotype:processed_pseudogene transcript_biotype:processed_pseudogene]                     |
| -3.21 | Spin2-ps2    | spindlin family, member 2, pseudogene 2 [gene_biotype:processed_pseudogene transcript_biotype:processed_pseudogene]  |
| -3.23 | Gm12647      | predicted gene 12647 [gene_biotype:processed_pseudogene transcript_biotype:processed_pseudogene]                     |
| -3.23 | Gm15899      | predicted gene 15899 [gene_biotype:processed_pseudogene transcript_biotype:processed_pseudogene]                     |
| -3.24 | mt-Tc        | mitochondrially encoded tRNA cysteine [gene_biotype:Mt_tRNA transcript_biotype:Mt_tRNA]                              |
| -3.24 | Gm25312      | predicted gene, 25312 [gene_biotype:snRNA transcript_biotype:snRNA]                                                  |
| -3.25 | Cela3b       | Mus musculus chymotrypsin-like elastase family, member 3B (Cela3b), mRNA.                                            |
| -3.26 | LOC100861674 | PREDICTED: uncharacterized LOC100861674 (LOC100861674), miscRNA.                                                     |
| -3.26 | ---          | Non-coding transcript identified by NONCODE: Antisense                                                               |
| -3.26 | Rnu2-10      | Mus musculus U2 small nuclear RNA 10 (Rnu2-10), small nuclear RNA.                                                   |
| -3.29 | Gm12481      | predicted gene 12481                                                                                                 |
| -3.30 | Gm22057      | predicted gene, 22057 [gene_biotype:snRNA transcript_biotype:snRNA]                                                  |
| -3.31 | Gm24798      | predicted gene, 24798 [gene_biotype:snRNA transcript_biotype:snRNA]                                                  |
| -3.31 | Gm22108      | predicted gene, 22108 [gene_biotype:snRNA transcript_biotype:snRNA]                                                  |
| -3.31 | Gm24149      | predicted gene, 24149 [gene_biotype:snRNA transcript_biotype:snRNA]                                                  |
| -3.31 | ---          | Mus musculus non-coding RNA, oocyte clustered small RNA12004, complete sequence.                                     |
| -3.32 | Gm25818      | predicted gene, 25818 [gene_biotype:snRNA transcript_biotype:snRNA]                                                  |
| -3.32 | Gm17136      | predicted gene 17136 [gene_biotype:processed_pseudogene transcript_biotype:processed_pseudogene]                     |
| -3.32 | ---          | Mus musculus RNA for germline small RNA gsRNA285, complete sequence.                                                 |
| -3.33 | Gm23876      | predicted gene, 23876 [gene_biotype:miRNA transcript_biotype:miRNA]                                                  |
| -3.33 | ---          | Non-coding transcript identified by NONCODE: Sense No Exonic                                                         |
| -3.34 | Gm15452      | predicted gene 15452 [gene_biotype:processed_pseudogene transcript_biotype:processed_pseudogene]                     |

|       |            |                                                                                                              |
|-------|------------|--------------------------------------------------------------------------------------------------------------|
| -3.34 | ---        | Non-coding transcript identified by NONCODE: Linc                                                            |
| -3.35 | Mir7210    | Mus musculus microRNA 7210 (Mir7210), microRNA.                                                              |
| -3.35 | ---        | Non-coding transcript identified by Luo, et al.                                                              |
| -3.36 | Gm24150    | predicted gene, 24150 [gene_biotype:snRNA transcript_biotype:snRNA]                                          |
| -3.36 | Gm23287    | predicted gene, 23287 [gene_biotype:snRNA transcript_biotype:snRNA]                                          |
| -3.37 | Mir466h    | Mus musculus microRNA 466h (Mir466h), microRNA.                                                              |
| -3.38 | ---        | Non-coding transcript identified by NONCODE: Sense No Exonic                                                 |
| -3.40 | Gm26285    | predicted gene, 26285 [gene_biotype:snRNA transcript_biotype:snRNA]                                          |
| -3.41 | Mir669d    | microRNA 669d [gene_biotype:miRNA transcript_biotype:miRNA]                                                  |
| -3.42 | Gm22016    | predicted gene, 22016                                                                                        |
| -3.44 | Gm23422    | predicted gene, 23422 [gene_biotype:snRNA transcript_biotype:snRNA]                                          |
| -3.44 | Gm15610    | predicted gene 15610 [gene_biotype:processed_pseudogene transcript_biotype:processed_pseudogene]             |
| -3.45 | Gm24136    | predicted gene, 24136 [gene_biotype:snRNA transcript_biotype:snRNA]                                          |
| -3.47 | Gm25186    | predicted gene, 25186 [gene_biotype:snRNA transcript_biotype:snRNA]                                          |
| -3.49 | Gm22063    | predicted gene, 22063 [gene_biotype:snRNA transcript_biotype:snRNA]                                          |
| -3.50 | mt-Te      | mitochondrially encoded tRNA glutamic acid [gene_biotype:Mt tRNA transcript_biotype:Mt tRNA]                 |
| -3.51 | ---        | Non-coding transcript identified by NONCODE: Sense No Exonic                                                 |
| -3.51 | Gm25848    | predicted gene, 25848 [gene_biotype:snoRNA transcript_biotype:snoRNA]                                        |
| -3.51 | Gm26441    | predicted gene, 26441 [gene_biotype:snRNA transcript_biotype:snRNA]                                          |
| -3.54 | Gm23610    | predicted gene, 23610 [gene_biotype:snRNA transcript_biotype:snRNA]                                          |
| -3.56 | Gm22623    | predicted gene, 22623 [gene_biotype:snRNA transcript_biotype:snRNA]                                          |
| -3.56 | Gm25005    | predicted gene, 25005 [gene_biotype:snRNA transcript_biotype:snRNA]                                          |
| -3.56 | Gm15026    | predicted gene 15026                                                                                         |
| -3.56 | ---        | Non-coding transcript identified by Luo, et al.                                                              |
| -3.57 | ---        | Non-coding transcript identified by NONCODE: Linc                                                            |
| -3.59 | ---        | Non-coding transcript identified by NONCODE: Sense No Exonic                                                 |
| -3.60 | Gm27649    | predicted gene, 27649 [gene_biotype:snRNA transcript_biotype:snRNA]                                          |
| -3.60 | ---        | Non-coding transcript identified by NONCODE: Sense No Exonic                                                 |
| -3.61 | Mir7073    | Mus musculus microRNA 7073 (Mir7073), microRNA.                                                              |
| -3.61 | ---        | Non-coding transcript identified by NONCODE: Linc                                                            |
| -3.63 | Rnu2-10    | U2 small nuclear RNA 10                                                                                      |
| -3.64 | Gm25820    | predicted gene, 25820                                                                                        |
| -3.65 | Gm22456    | predicted gene, 22456 [gene_biotype:snRNA transcript_biotype:snRNA]                                          |
| -3.66 | Gm26135    | predicted gene, 26135 [gene_biotype:snoRNA transcript_biotype:snoRNA]                                        |
| -3.68 | Try10      | Mus musculus trypsin 10 (Try10), mRNA.                                                                       |
| -3.68 | Gm25937    | predicted gene, 25937 [gene_biotype:snRNA transcript_biotype:snRNA]                                          |
| -3.68 | Gm23116    | predicted gene, 23116 [gene_biotype:snRNA transcript_biotype:snRNA]                                          |
| -3.70 | Mir7j      | Mus musculus microRNA 7j (Mir7j), microRNA.                                                                  |
| -3.72 | Gm23570    | predicted gene, 23570 [gene_biotype:snRNA transcript_biotype:snRNA]                                          |
| -3.73 | Gm13401    | predicted gene 13401 [gene_biotype:processed_pseudogene transcript_biotype:processed_pseudogene]             |
| -3.74 | ---        | Non-coding transcript identified by NONCODE: Sense No Exonic                                                 |
| -3.77 | ---        | Mus musculus non-coding RNA, oocyte_clustered_small_RNA7978, complete sequence.                              |
| -3.79 | Gm15035    | predicted gene 15035                                                                                         |
| -3.79 | ---        | Non-coding transcript identified by NONCODE: Sense No Exonic                                                 |
| -3.80 | Gm25032    | predicted gene, 25032 [gene_biotype:miRNA transcript_biotype:miRNA]                                          |
| -3.80 | ---        | Non-coding transcript identified by NONCODE: Sense No Exonic                                                 |
| -3.81 | Gm26254    | predicted gene, 26254 [gene_biotype:snRNA transcript_biotype:snRNA]                                          |
| -3.82 | ---        | Non-coding transcript identified by NONCODE: Linc                                                            |
| -3.84 | ND2        | mitochondrially encoded NADH dehydrogenase 2 [gene_biotype:protein_coding transcript_biotype:protein_coding] |
| -3.84 | Mirlet7f-2 | Mus musculus microRNA let7f-2 (Mirlet7f-2), microRNA.                                                        |
| -3.84 | Gm19945    | PREDICTED: predicted gene, 19945 (Gm19945), mRNA.                                                            |
| -3.85 | Gm5396     | predicted pseudogene 5396                                                                                    |
| -3.85 | Gm5409     | Mus musculus predicted pseudogene 5409 (Gm5409), mRNA.                                                       |
| -3.87 | Gm11794    | predicted gene 11794 [gene_biotype:processed_pseudogene transcript_biotype:processed_pseudogene]             |
| -3.88 | Gm26164    | predicted gene, 26164 [gene_biotype:snRNA transcript_biotype:snRNA]                                          |
| -3.89 | mt-Tg      | mitochondrially encoded tRNA glycine [gene_biotype:Mt tRNA transcript_biotype:Mt tRNA]                       |
| -3.90 | ---        | Mus musculus non-coding RNA, oocyte_clustered_small_RNA1775, complete sequence.                              |
| -3.91 | ---        | Mus musculus piRNA piR-134834, complete sequence.                                                            |
| -3.92 | Gm23645    | predicted gene, 23645 [gene_biotype:snRNA transcript_biotype:snRNA]                                          |
| -3.92 | Gm24522    | predicted gene, 24522 [gene_biotype:snRNA transcript_biotype:snRNA]                                          |
| -3.96 | ---        | Non-coding transcript identified by NONCODE: Sense No Exonic                                                 |
| -3.96 | Gm26160    | predicted gene, 26160 [gene_biotype:snRNA transcript_biotype:snRNA]                                          |
| -4.01 | Tff2       | Mus musculus trefoil factor 2 (spasmolytic protein 1) (Tff2), mRNA.                                          |
| -4.03 | mt-Tv      | mitochondrially encoded tRNA valine [gene_biotype:Mt tRNA transcript_biotype:Mt tRNA]                        |
| -4.03 | Gm22977    | predicted gene, 22977 [gene_biotype:snRNA transcript_biotype:snRNA]                                          |
| -4.05 | Gm25538    | predicted gene, 25538 [gene_biotype:snRNA transcript_biotype:snRNA]                                          |
| -4.05 | mt-Tn      | mitochondrially encoded tRNA asparagine [gene_biotype:Mt tRNA transcript_biotype:Mt tRNA]                    |
| -4.05 | Uck2       | uridine-cytidine kinase 2 [gene_biotype:protein_coding transcript_biotype:protein_coding]                    |
| -4.05 | Gm24311    | predicted gene, 24311 [gene_biotype:snRNA transcript_biotype:snRNA]                                          |
| -4.11 | Gm25364    | predicted gene, 25364 [gene_biotype:snRNA transcript_biotype:snRNA]                                          |
| -4.16 | Ighv1-63   | immunoglobulin heavy variable V1-63                                                                          |
| -4.19 | Gm26048    | predicted gene, 26048 [gene_biotype:snoRNA transcript_biotype:snoRNA]                                        |
| -4.19 | Snord42a   | Mus musculus small nucleolar RNA, C/D box 42A (Snord42a), small nucleolar RNA.                               |
| -4.21 | ---        | Non-coding transcript identified by NONCODE: Sense No Exonic                                                 |
| -4.22 | Ighv6-7    | Ighv6-7 immunoglobulin heavy variable V6-7                                                                   |
| -4.23 | Snord58b   | Mus musculus small nucleolar RNA, C/D box 58B (Snord58b), small nucleolar RNA.                               |
| -4.24 | mt-Th      | mitochondrially encoded tRNA histidine [gene_biotype:Mt tRNA transcript_biotype:Mt tRNA]                     |

|        |               |                                                                                                  |
|--------|---------------|--------------------------------------------------------------------------------------------------|
| -4.25  | Gm22808       | predicted gene, 22808 [gene_biotype:snRNA transcript_biotype:snRNA]                              |
| -4.26  | Gm4596        | predicted gene 4596 [gene_biotype:processed_pseudogene transcript_biotype:processed_pseudogene]  |
| -4.26  | ---           | Non-coding transcript identified by NONCODE: Linc                                                |
| -4.32  | Klk1          | Mus musculus kallikrein 1 (Klk1), mRNA.                                                          |
| -4.34  | Mir466        | Mus musculus microRNA 466 (Mir466), microRNA.                                                    |
| -4.39  | ---           | Non-coding transcript identified by NONCODE: Sense No Exonic                                     |
| -4.40  | ---           | Mus musculus non-coding RNA, oocyte_clustered_small_RNA5118, complete sequence.                  |
| -4.40  | ---           | Mus musculus non-coding RNA, oocyte_clustered_small_RNA5118, complete sequence.                  |
| -4.40  | ---           | Mus musculus non-coding RNA, oocyte_clustered_small_RNA5120, complete sequence.                  |
| -4.40  | ---           | Mus musculus non-coding RNA, oocyte_clustered_small_RNA5120, complete sequence.                  |
| -4.43  | Gm24592       | predicted gene, 24592 [gene_biotype:snRNA transcript_biotype:snRNA]                              |
| -4.43  | Gm25412       | predicted gene, 25412 [gene_biotype:snRNA transcript_biotype:snRNA]                              |
| -4.51  | Pnlipr1       | Mus musculus pancreatic lipase related protein 1 (Pnlipr1), mRNA.                                |
| -4.55  | Gm24390       | predicted gene, 24390 [gene_biotype:snRNA transcript_biotype:snRNA]                              |
| -4.57  | Gm12252       | predicted gene 12252 [gene_biotype:processed_pseudogene transcript_biotype:processed_pseudogene] |
| -4.58  | ---           | Non-coding transcript identified by Luo, et al.                                                  |
| -4.65  | ---           | Non-coding transcript identified by NONCODE: Linc                                                |
| -4.67  | LOC100861957  | PREDICTED: uncharacterized LOC100861957 (LOC100861957), miscRNA.                                 |
| -4.67  | Zg16          | Mus musculus zymogen granule protein 16 (Zg16), mRNA.                                            |
| -4.69  | ---           | Mus musculus non-coding RNA, oocyte_clustered_small_RNA3025, complete sequence.                  |
| -4.72  | ---           | Mus musculus non-coding RNA, oocyte_clustered_small_RNA849, complete sequence.                   |
| -4.78  | Snord58b      | small nucleolar RNA, C/D box 58B (Snord58b), small nucleolar RNA.                                |
| -4.82  | Gm10093       | predicted pseudogene 10093 [gene_biotype:protein_coding transcript_biotype:protein_coding]       |
| -4.92  | LOC100862117  | PREDICTED: uncharacterized LOC100862117 (LOC100862117), miscRNA.                                 |
| -4.92  | LOC100862123  | PREDICTED: uncharacterized LOC100862123 (LOC100862123), miscRNA.                                 |
| -4.92  | LOC100862131  | PREDICTED: uncharacterized LOC100862131 (LOC100862131), miscRNA.                                 |
| -4.92  | LOC100862139  | PREDICTED: uncharacterized LOC100862139 (LOC100862139), miscRNA.                                 |
| -4.99  | ---           | Non-coding transcript identified by NONCODE: Linc                                                |
| -5.07  | ---           | Mus musculus non-coding RNA, oocyte_piRNA3856, complete sequence.                                |
| -5.07  | ---           | Mus musculus non-coding RNA, oocyte_clustered_small_RNA6819, complete sequence.                  |
| -5.59  | Gm26870       | predicted gene, 26870 [gene_biotype:lincRNA transcript_biotype:lincRNA]                          |
| -5.64  | Mir28c        | microRNA 28c (Mir28c), microRNA.                                                                 |
| -5.64  | ---           | Mus musculus non-coding RNA, oocyte_clustered_small_RNA11551, complete sequence.                 |
| -6.11  | ---           | Non-coding transcript identified by NONCODE: Sense No Exonic                                     |
| -6.31  | ---           | Mus musculus non-coding RNA, oocyte_clustered_small_RNA2028, complete sequence.                  |
| -6.58  | ---           | Mus musculus non-coding RNA, oocyte_clustered_small_RNA4916, complete sequence.                  |
| -6.76  | Gm22574       | predicted gene, 22574 [gene_biotype:snoRNA transcript_biotype:snoRNA]                            |
| -6.83  | Ctrl          | Mus musculus chymotrypsin-like (Ctrl), mRNA.                                                     |
| -7.23  | ---           | Mus musculus non-coding RNA, oocyte_clustered_small_RNA7206, complete sequence.                  |
| -7.37  | Try5          | Mus musculus trypsin 5 (Try5), mRNA.                                                             |
| -7.71  | ---           | Non-coding transcript identified by NONCODE: Linc                                                |
| -7.72  | Cpb1          | Mus musculus carboxypeptidase B1 (tissue) (Cpb1), mRNA.                                          |
| -7.82  | Snord61       | Mus musculus small nucleolar RNA, C/D box 61 (Snord61), small nucleolar RNA.                     |
| -7.95  | ---           | Non-coding transcript identified by NONCODE: Sense No Exonic                                     |
| -8.06  | Gm22455       | predicted gene, 22455 [gene_biotype:snoRNA transcript_biotype:snoRNA]                            |
| -8.83  | Mir342        | microRNA 342                                                                                     |
| -8.83  | Mir342        | Mus musculus microRNA 342 (Mir342), microRNA.                                                    |
| -9.06  | Cela2a        | Mus musculus chymotrypsin-like elastase family, member 2A (Cela2a), mRNA.                        |
| -9.14  | Gm24148       | Mus musculus predicted gene, 24148 (Gm24148), microRNA.                                          |
| -9.54  | Mir300        | Mus musculus microRNA 300 (Mir300), microRNA.                                                    |
| -10.71 | Cela1         | Mus musculus chymotrypsin-like elastase family, member 1 (Cela1), mRNA.                          |
| -10.99 | Clps          | Mus musculus colipase, pancreatic (Clps), mRNA.                                                  |
| -11.63 | Sycn          | Mus musculus syncollin (Sycn), mRNA.                                                             |
| -11.89 | Pnlip         | Mus musculus pancreatic lipase (Pnlip), mRNA.                                                    |
| -12.93 | 2210010C04Rik | Mus musculus RIKEN cDNA 2210010C04 gene (2210010C04Rik), mRNA.                                   |
| -13.64 | Rnase1        | Mus musculus ribonuclease, RNase A family, 1 (pancreatic) (Rnase1), mRNA.                        |
| -15.72 | Amy2a5        | amylase 2a5 (Amy2a5), mRNA.                                                                      |
| -15.86 | Mir340        | Mus musculus microRNA 340 (Mir340), microRNA.                                                    |
| -18.40 | Ctrb1         | Mus musculus chymotrypsinogen B1 (Ctrb1), mRNA.                                                  |
| -20.93 | Cpa1          | Mus musculus carboxypeptidase A1, pancreatic (Cpa1), mRNA.                                       |
| -21.16 | Amy2a5        | Mus musculus amylase 2a5 (Amy2a5), mRNA.                                                         |
| -21.32 | Mir224        | microRNA 224                                                                                     |
| -21.32 | Mir224        | Mus musculus microRNA 224 (Mir224), microRNA.                                                    |
| -22.45 | Try4          | Mus musculus trypsin 4 (Try4), mRNA.                                                             |
| -23.75 | Cel           | Mus musculus carboxyl ester lipase (Cel), mRNA.                                                  |
| -26.42 | Gm27616       | predicted gene, 27616 [gene_biotype:miRNA transcript_biotype:miRNA]                              |
| -26.66 | Prss2         | Mus musculus protease, serine 2 (Prss2), mRNA.                                                   |
| -28.60 | Amy2a1        | amylase 2a1 [gene_biotype:protein_coding transcript_biotype:protein_coding]                      |
| -29.38 | Amy2a5        | amylase 2a5 (Amy2a5), mRNA.                                                                      |
| -29.38 | Amy2a5        | amylase 2a5 (Amy2a5), mRNA.                                                                      |
| -41.54 | Amy2b         | Mus musculus amylase 2b (Amy2b), transcript variant 1, mRNA.                                     |
| -57.45 | Gm19347       | PREDICTED: predicted gene, 19347 (Gm19347), miscRNA.                                             |
