# Supplementary material
Source: publisher figshare collection journal article supplement (https://diabetesjournals.figshare.com/articles/dataset/_/13103045)
Supplement: Supplementary file 5 [file 1]

Supplementary Table 5

Pathway analysis of upregulated gene expression at ZT 16 in Bmal1<sup>0V</sup> (HFD) vs. Control (HFD)

| GO: Pathway Name                                                               | P-value    | Genes                                                                                           |
|--------------------------------------------------------------------------------|------------|-------------------------------------------------------------------------------------------------|
| Innate immune response(4)                                                      | 3.795E-06  | APOBEC3,CLEC2D,CSF1,GBP7,GBP7,IFIT1,NFKBIA,NR1D1,OAS2,RIPK2,RSAD2,S100A8,S100A9,SERPING1,STAT2  |
| immune effector process(3)                                                     | 3.354E-04  | ADORA2B,ALPK1,APOBEC3,CLEC2D,DDIT4,GADD45G,HIST1H3E,IFIT1,OAS2,RIPK2,RSAD2,SERPING1,STAT2,ZFP35 |
| leukocyte cell cell adhesion(5)                                                | 3.354E-04  | CCL28,FCGR4,GADD45G,HSPH1,PSMB10,RIPK2,RSAD2,S100A8,S100A9,SOX4,ZBTB16,ZFP35                    |
| negative regulation of catalytic activity(4)                                   | 3.354E-04  | CDKN1A,CNN3,CRY2,ERRF1,GADD45B,GADD45G,PTPN1,SGS2,SERPINA10,SERPINA3F,SERPINA3N,SERPING1,TRIB1  |
| homotypic cell cell adhesion(5)                                                | 4.587E-04  | FCGR4,GADD45G,HSPH1,PLEK,PSMB10,RIPK2,RSAD2,S100A8,S100A9,SOX4,ZBTB16,ZFP35                     |
| response to cytokine(5)                                                        | 4.587E-04  | CSF1,GBP10,GBP7,IFIT1,IFNGR2,JUNB,NFKBIA,RIPK2,SERPINA3F,SERPINA3I,SERPINA3N,STAT2              |
| defense response to other organism(4)                                          | 4.738E-04  | ALPK1,APOBEC3,DDIT4,GBP10,GBP7,HIST1H3E,IFIT1,OAS2,REG3B,RIPK2,RSAD2,STAT2                      |
| negative regulation of phosphorus metabolic process(5)&negative regulation     | 4.738E-04  | BIRC3,CDKN1A,CRY2,DDIT4,ERRF1,GADD45B,GADD45G,HSPH1,PLEK,PTPN1,SGS2,TRIB1                       |
| regulation of defense response(5)                                              | 4.974E-04  | ADORA2B,ALPK1,CLEC2D,HIST1H3E,NFKBIA,NR1D1,RIPK2,RSAD2,S100A8,S100A9,SERPING1,STAT2             |
| inflammatory response(5)                                                       | 5.220E-04  | ADORA2B,CSF1,ELF3,NFKBIZ,NUPR1,REG3A,REG3B,S100A8,S100A9,SERPINA3N,SERPING1,ZFP35               |
| leukocyte aggregation(6)                                                       | 5.220E-04  | FCGR4,GADD45G,HSPH1,PSMB10,RIPK2,RSAD2,S100A8,S100A9,SOX4,ZBTB16,ZFP35                          |
| alpha beta T cell activation(6)                                                | 6.013E-04  | FCGR4,GADD45G,HSPH1,RIPK2,RSAD2,ZBTB16,ZFP35                                                    |
| single organismal cell cell adhesion(4)                                        | 7.237E-04  | CCL28,FCGR4,GADD45G,HSPH1,PLEK,PSMB10,RIPK2,RSAD2,S100A8,S100A9,SOX4,ZBTB16,ZFP35               |
| leukocyte differentiation(6)                                                   | 1.317E-03  | CLEC2D,CSF1,GADD45G,JUNB,RIPK2,RSAD2,SNX10,SOX4,TRIB1,ZBTB16,ZFP35                              |
| negative regulation of phosphorylation(7)                                      | 1.429E-03  | BIRC3,CDKN1A,DDIT4,ERRF1,GADD45B,GADD45G,HSPH1,PTPN1,SGS2,TRIB1                                 |
| negative regulation of protein modification process(6)                         | 3.220E-03  | CDKN1A,CRY2,DDIT4,ERRF1,GADD45B,GADD45G,HSPH1,PTPN1,SGS2,SOX4,TRIB1                             |
| circadian regulation of gene expression(4)                                     | 3.482E-03  | ARNTL,CRY2,NOCT,NPAS2,NR1D1                                                                     |
| defense response to virus(4)                                                   | 4.108E-03  | ALPK1,APOBEC3,DDIT4,HIST1H3E,IFIT1,OAS2,RSAD2,STAT2                                             |
| positive regulation of cell death(4)                                           | 4.195E-03  | BTG1,CDKN1A,DDIT4,GADD45B,GADD45G,NUPR1,RIPK2,S100A8,S100A9,SOX4,ZBTB16                         |
| negative regulation of protein phosphorylation(7)                              | 4.492E-03  | CDKN1A,DDIT4,ERRF1,GADD45B,GADD45G,HSPH1,PTPN1,SGS2,TRIB1                                       |
| negative regulation of immune system process(3)                                | 5.230E-03  | CCL28,CLEC2D,HIST1H4H,NFKBIA,NR1D1,SERPING1,TRIB1,ZBTB16,ZFP35                                  |
| negative regulation of protein kinase activity(7)                              | 5.230E-03  | CDKN1A,ERRF1,GADD45B,GADD45G,PTPN1,SGS2,TRIB1                                                   |
| fat cell differentiation(6)                                                    | 6.089E-03  | ARNTL,CEBPD,NOCT,NR1D1,PEX11A,SGS2,ZBTB16                                                       |
| regulation of immune effector process(4)                                       | 0.00608868 | ADORA2B,ALPK1,CLEC2D,HIST1H3E,RIPK2,RSAD2,SERPING1,STAT2,ZFP35                                  |
| response to lipopolysaccharide(5)                                              | 0.00633785 | FCGR4,GBP10,JUNB,NFKBIA,NOCT,NR1D1,RIPK2,TRIB1                                                  |
| negative regulation of hemopoiesis(4)                                          | 0.00700902 | CLEC2D,HIST1H4H,NFKBIA,TRIB1,ZBTB16,ZFP35                                                       |
| response to virus(4)                                                           | 0.00700902 | ALPK1,APOBEC3,DDIT4,HIST1H3E,IFIT1,OAS2,RSAD2,STAT2                                             |
| negative regulation of kinase activity(6)                                      | 0.00706436 | CDKN1A,ERRF1,GADD45B,GADD45G,PTPN1,SGS2,TRIB1                                                   |
| response to molecule of bacterial origin(5)                                    | 0.00854625 | FCGR4,GBP10,JUNB,NFKBIA,NOCT,NR1D1,RIPK2,TRIB1                                                  |
| response to bacterium(4)                                                       | 0.00855879 | FCGR4,GBP10,GBP7,JUNB,NFKBIA,NOCT,NR1D1,REG3B,RIPK2,TRIB1                                       |
| positive regulation of programmed cell death(5)                                | 0.0101104  | BTG1,CDKN1A,GADD45B,GADD45G,NUPR1,RIPK2,S100A8,S100A9,SOX4,ZBTB16                               |
| T cell aggregation(4)&T cell activation(5)                                     | 0.0104083  | FCGR4,GADD45G,HSPH1,PSMB10,RIPK2,RSAD2,SOX4,ZBTB16,ZFP35                                        |
| lymphocyte aggregation(7)                                                      | 0.0104083  | FCGR4,GADD45G,HSPH1,PSMB10,RIPK2,RSAD2,SOX4,ZBTB16,ZFP35                                        |
| negative regulation of myeloid cell differentiation(5)                         | 0.0104083  | CLEC2D,HIST1H4H,NFKBIA,TRIB1,ZBTB16                                                             |
| alpha beta T cell differentiation(7)                                           | 0.0119615  | GADD45G,RIPK2,RSAD2,ZBTB16,ZFP35                                                                |
| stress activated protein kinase signaling cascade(5)                           | 0.0132328  | ERRF1,GADD45B,GADD45G,HSPH1,PTPN1,RIPK2,TRIB1                                                   |
| regulation of hemopoiesis(4)                                                   | 0.0138499  | CLEC2D,CSF1,HIST1H4H,NFKBIA,RIPK2,TRIB1,ZBTB16,ZFP35                                            |
| myeloid cell differentiation(6)                                                | 0.0153192  | CLEC2D,CSF1,HIST1H4H,JUNB,NFKBIA,SNX10,TRIB1,ZBTB16                                             |
| positive regulation of defense response(4)                                     | 0.0163565  | ADORA2B,NFKBIA,NR1D1,RIPK2,RSAD2,S100A8,S100A9                                                  |
| negative regulation of transferase activity(5)                                 | 0.0185893  | CDKN1A,ERRF1,GADD45B,GADD45G,PTPN1,SGS2,TRIB1                                                   |
| intrinsic apoptotic signaling pathway(6)                                       | 0.022112   | CDKN1A,DDIT4,HSPH1,NUPR1,PTPN1,S100A8,S100A9                                                    |
| positive regulation of protein ubiquitination(8)                               | 0.0227908  | BIRC2,BIRC3,RIPK2,TRIB1,TSPYL5                                                                  |
| regulation of circadian rhythm(3)                                              | 0.0227908  | ARNTL,CRY2,NOCT,NPAS2,NR1D1                                                                     |
| negative regulation of hydrolase activity(5)                                   | 0.0241423  | CNN3,CRY2,SGS2,SERPINA10,SERPINA3F,SERPINA3I,SERPINA3N,SERPING1                                 |
| lymphocyte activation(4)                                                       | 0.0262513  | CDKN1A,FCGR4,GADD45G,HSPH1,PSMB10,RIPK2,RSAD2,SOX4,ZBTB16,ZFP35                                 |
| regulation of myeloid cell differentiation(5)                                  | 0.0262513  | CLEC2D,CSF1,HIST1H4H,NFKBIA,TRIB1,ZBTB16                                                        |
| bile acid biosynthetic process(6)                                              | 0.0273436  | AMACR,CYP39A1,NR1D1                                                                             |
| regulation of innate immune response(5)                                        | 0.0275335  | CLEC2D,NFKBIA,NR1D1,RIPK2,RSAD2,SERPING1                                                        |
| response to peptide(5)                                                         | 0.029527   | CRY2,NFKBIA,PTPN1,RIPK2,SERPINA3F,SERPINA3I,SERPINA3N                                           |
| negative regulation of cell differentiation(4)                                 | 0.0297854  | AREG,ARNTL,CLEC2D,HIST1H4H,NFKBIA,NOCT,REG3A,TRIB1,ZBTB16,ZFP35                                 |
| cellular response to lipopolysaccharide(6)                                     | 0.0300161  | FCGR4,GBP10,NFKBIA,NR1D1,RIPK2,TRIB1                                                            |
| regulation of multi organism process(3)                                        | 0.0312371  | ALPK1,APOBEC3,HIST1H3E,P2RY1,RIPK2,RSAD2,STAT2,TRIB1                                            |
| cellular response to cytokine stimulus(6)                                      | 0.032268   | CSF1,GBP10,GBP7,IFIT1,IFNGR2,NFKBIA,RIPK2,STAT2                                                 |
| positive regulation of protein modification by small protein conjugation or re | 0.032268   | BIRC2,BIRC3,RIPK2,TRIB1,TSPYL5                                                                  |
| regulation of protein ubiquitination(8)                                        | 0.032268   | BIRC2,BIRC3,RIPK2,SOX4,TRIB1,TSPYL5                                                             |
| acute inflammatory response(6)                                                 | 0.033803   | NUPR1,REG3A,REG3B,SERPINA3N,SERPING1                                                            |
| positive regulation of apoptotic process(6)                                    | 0.033803   | BTG1,GADD45B,GADD45G,NUPR1,RIPK2,S100A8,S100A9,SOX4,ZBTB16                                      |
| cellular response to molecule of bacterial origin(5)                           | 0.0340341  | FCGR4,GBP10,NFKBIA,NR1D1,RIPK2,TRIB1                                                            |
| CD4 positive alpha beta T cell differentiation(8)                              | 0.0340958  | GADD45G,RIPK2,RSAD2,ZFP35                                                                       |
| regulation of ossification(4)                                                  | 0.0347529  | AREG,CEBPD,CSF1,NOCT,RSAD2,ZBTB16                                                               |
| regulation of endopeptidase activity(7)                                        | 0.0350303  | S100A8,S100A9,SERPINA10,SERPINA3F,SERPINA3I,SERPINA3N,SERPING1                                  |
| stress activated MAPK cascade(6)                                               | 0.0374615  | GADD45B,GADD45G,HSPH1,PTPN1,RIPK2,TRIB1                                                         |
| wound healing(5)                                                               | 0.0400002  | P2RY1,PLEK,REG3A,S100A9,SCNN1G,SERPINA10,SERPING1                                               |
| regulation of p38MAPK cascade(7)                                               | 0.0414725  | GADD45B,GADD45G,HSPH1                                                                           |
| autophagy(3)                                                                   | 0.0417361  | ALPK1,GABARAPL1,HIST1H3E,PI3K,RIPK2,S100A8,S100A9,STAT2                                         |
| regulation of protein modification by small protein conjugation or removal(7)  | 0.0444898  | BIRC2,BIRC3,RIPK2,SOX4,TRIB1,TSPYL5                                                             |
| cellular response to biotic stimulus(4)                                        | 0.0472753  | FCGR4,GBP10,NFKBIA,NR1D1,RIPK2,TRIB1                                                            |
| CD4 positive alpha beta T cell activation(7)                                   | 0.0477036  | GADD45G,RIPK2,RSAD2,ZFP35                                                                       |
| T cell differentiation(6)                                                      | 0.048755   | GADD45G,RIPK2,RSAD2,SOX4,ZBTB16,ZFP35                                                           |
| p38MAPK cascade(7)                                                             | 0.048755   | GADD45B,GADD45G,HSPH1                                                                           |

| KEGG: Pathway Name                      | P-value | Genes                                              |
|-----------------------------------------|---------|----------------------------------------------------|
| Circadian rhythm                        | 0.0024  | ARNTL,CRY2,NPAS2,NR1D1                             |
| Osteoclast differentiation              | 0.0024  | CSF1,FCGR4,IFNGR2,JUNB,NFKBIA,STAT2                |
| Transcriptional misregulation in cancer | 0.0024  | BIRC3,CDKN1A,HIST1H3E,HIST1H3F,NFKBIZ,NUPR1,ZBTB16 |
| TNF signaling pathway                   | 0.0112  | BIRC2,BIRC3,CSF1,JUNB,NFKBIA                       |
| Herpes simplex infection                | 0.0122  | ARNTL,IFIT1,IFNGR2,NFKBIA,OAS2,STAT2               |
| NOD-like receptor signaling pathway     | 0.0122  | BIRC2,BIRC3,NFKBIA,RIPK2                           |
| Hepatitis C                             | 0.0179  | CDKN1A,IFIT1,NFKBIA,OAS2,STAT2                     |
| Influenza A                             | 0.0392  | IFNGR2,NFKBIA,OAS2,RSAD2,STAT2                     |
